# Supplementary material for: Transcriptomic Analysis in Multiple Myeloma and Primary Plasma Cell Leukemia with t(11;14) Reveals Different Expression Patterns with Biological Implications in Venetoclax Sensitivity
Source: MDPI journal article supplement (doi:10.3390/cancers13194898), 2021-09-29
Supplement: s1 [file s1]

## SUPPLEMENTARY METHODS

### Quantitative real-time PCR (qRT-PCR)

qRT-PCR was performed as previously described<sup>1</sup>. Primers used for the analyses are as follow.

| Primer name    | Sequence (5'-3')               |
|----------------|--------------------------------|
| BCL2 forward   | 5' – TTGTAATTCATCTGCCGCCG – 3' |
| BCL2 reverse   | 5' – CAATGAATCAGGAGTCGCGG – 3' |
| BCL2L1 forward | 5' – CCCCTTAGCCTCCCTGAAAA – 3' |
| BCL2L1 reverse | 5' – GAGTCCTGGTCCTTGCACT – 3'  |
| MCL1 forward   | 5' – CACCACCACAAAACCAGTT – 3'  |
| MCL1 reverse   | 5' – GTCCTCCTCCATAGCTTCCC – 3' |
| CD79A forward  | 5' – GCAACGAGTCATACCAGCAG – 3' |
| CD79A reverse  | 5' – TATTCATCCCCGGCATCCAA – 3' |
| MS4A1 forward  | 5' – AGGATGTCTTCACTGGTGGG – 3' |
| MS4A1 reverse  | 5' – ACACAGTCACACAGATGGGT – 3' |
| BEND5 forward  | 5' – CATCTGGGAAGCGGGATTG – 3'  |
| BEND5 reverse  | 5' – GAGAGGGGTGGTTTAGGGAC – 3' |
| SORT1 forward  | 5' – GGTGACTGACTGTTCCCTGA – 3' |
| SORT1 reverse  | 5' – ACCACATGCTCAGAAAGGGA – 3' |
| GAPDH forward  | 5' – ACAGTCAGCCGCATCTTCTT – 3' |
| GAPDH reverse  | 5' – AATGAAGGGGTCATTGATGG – 3' |

### Multi-Omics Data in CoMMpass Study

Multi-omics data about bone marrow MM samples at baseline (BM\_1) were freely accessible from MMRF CoMMpass Study (<https://research.themmr.org/>) and retrieved from the Interim Analysis 15a (MMRF\_CoMMpass\_IA15a).

Information about t(11;14) occurrence was inferred from CCND1 spike expression estimates from RNA-sequencing (RNA-seq) data (MMRF\_CoMMpass\_IA15a\_RNAseq\_Canonical\_Ig\_Translocations) and Transcript per Million (TPM) reads values of the investigated transcripts were obtained by Salmon gene expression quantification (MMRF\_CoMMpass\_IA15a\_E74GTF\_Salmon\_V7.2\_Filtered\_Gene\_TPM) in 774 BM\_1 MM patients. Clinical data regarding Overall Survival (OS) and Progression free Survival (PFS) were considered in 767 MM patients for which both RNA-seq expression and survival data were available. Non-synonymous (NS) somatic mutation variants and counts data were obtained

from whole exome sequencing (WES) analyses, main IgH translocations were inferred from RNA-seq spike expression estimates of known target genes and Copy Number Alteration (CNA) data were retrieved by means of Next generation Sequencing (NGS)-based fluorescence in situ hybridization (FISH) <sup>2</sup> in 497 MM cases for which all data were available <sup>3</sup>.

The presence of a specific CNA was considered when occurring in at least one of the investigated cytoband at a 20 percent cut-off for each considered chromosomal aberration, as previously reported <sup>3</sup>.

### **Survival and statistical analyses**

Survival analyses were performed using survival and survminer packages in R Bioconductor (version 4.0.0). Kaplan-Meier analysis was applied on OS and PFS data in 767 MM cohort stratified in high/low expression group according to median cut-off on lncRNAs expression levels. Log-Rank test p-value was calculated to measure the global difference between survival curves. The number of samples at risk in each group across time was calculated.

Cox proportional hazards model was applied as univariate analysis on single molecular variables and International Staging System (ISS) groups in relation to OS and PFS data, in 497 MM cases for which all information were accessible and significant features with p-value < 0.05 were tested by Cox regression multivariate analysis.

Wilcoxon and Kruskal-Wallis tests were applied to assess the differences in gene expression levels between two or more groups. Benjamini-Hochberg correction was applied to global p-values. Dunn's test was used to assess pairwise comparisons between multiple groups. Fisher's exact test was performed to verify the association of high/low lncRNA expression groups with main molecular aberrations investigated in CoMMpass cohort.

### **Functional annotation enrichment analysis**

Gene Set Enrichment Analysis (GSEA) <sup>4</sup> was performed under default conditions on pre-ranked protein coding gene list based on fold-change values. Hallmark, Reactome, KEGG and C2-Gene Perturbations, filtered for Multiple Myeloma term and Gene Ontology (GO) gene sets (version 7.1), were selected on the base of nominal p-value < 0.05.

Cluster Profiler analysis <sup>5</sup> was performed in R environment on DE global protein coding gene list and the top (BH adjusted pvalue) GSEA gene sets, based on Gene-Ontology (GO) Biological Process (BP) terms, were selected. Cnetplot function was applied to depict the linkages of genes and biological GO terms as a network.

Functional enrichment analysis by means of the database for annotation, visualization and integrated discovery (DAVID) 6.8<sup>6</sup>, which can be freely accessed at <http://david.abcc.ncifcrf.gov/>, was performed at high stringency by means of functional annotation clustering on GO terms. Significant annotation clusters were selected on the base of Enrichment Score >1.3 and representative GO annotation terms were reported for each cluster.

1. Ronchetti D, Todoerti K, Vinci C, Favasuli V, Agnelli L, Manzoni M, Pelizzoni F, Chiaramonte R, Platonova N, Giuliani N, Tassone P, Amodio N, Neri A, Taiana E. Expression Pattern and Biological Significance of the lncRNA ST3GAL6-AS1 in Multiple Myeloma. *Cancers (Basel)*. 2020 Mar 25;12(4):782. doi: 10.3390/cancers12040782.
2. Miller, C. et al. A comparison of clinical FISH and sequencing based FISH estimates in multiple myeloma: An MMRF CoMMpass analysis. In: Hematology TAsO, editor. The American Society of Hematology; 2016: Blood; 2016. p. 374.
3. Todoerti K, Ronchetti D, Favasuli V, Maura F, Morabito F, Bolli N, Taiana E, Neri A. DIS3 mutations in multiple myeloma impact the transcriptional signature and clinical outcome. *Haematologica*. 2021
4. Subramanian A, Tamayo P, Mootha VK, et al. Gene set enrichment analysis: a knowledge-based approach for interpreting genome-wide expression profiles. *PNAS*. 2005; 102(43):15545-50.
5. Yu G, Wang L, Han Y, He Q (2012). "clusterProfiler: an R package for comparing biological themes among gene clusters." *OMICS: A Journal of Integrative Biology*, 16(5), 284-287.
6. Huang DW, Sherman BT, Lempicki RA. Systematic and integrative analysis of large gene lists using DAVID Bioinformatics Resources. *Nature Protoc*. 2009;4(1):44-57.

**Supplementary Table S1.** List of 2416 differentially expressed coding genes in 7 t(11;14)-pPCL compared to 12 t(11;14)-MM cases, by SAM analysis at FDR<10%. Transcripts are ordered according to SAM (d) score.

| ensembl gene    | gene symbol | Score(d) | Fold Change |
|-----------------|-------------|----------|-------------|
| ENSG00000110321 | EIF4G2      | 8,09     | 2,05        |
| ENSG00000257103 | LSM14A      | 6,51     | 3,16        |
| ENSG00000101182 | PSMA7       | 6,31     | 3,54        |
| ENSG00000159459 | UBR1        | 6,20     | 2,26        |
| ENSG00000105849 | TWISTNB     | 5,67     | 3,06        |
| ENSG00000108107 | RPL28       | 5,63     | 2,21        |
| ENSG00000131711 | MAP1B       | 5,60     | 15,76       |
| ENSG00000101391 | CDK5RAP1    | 5,46     | 1,85        |
| ENSG00000137055 | PLAA        | 5,43     | 2,80        |
| ENSG00000183484 | GPR132      | 5,34     | 2,80        |
| ENSG00000161057 | PSMC2       | 5,13     | 1,91        |
| ENSG00000115053 | NCL         | 5,11     | 1,88        |
| ENSG00000101367 | MAPRE1      | 5,10     | 1,69        |
| ENSG00000164211 | STARD4      | 5,10     | 2,14        |
| ENSG00000198522 | GPN1        | 5,07     | 2,05        |
| ENSG00000141385 | AFG3L2      | 5,02     | 1,92        |
| ENSG00000137955 | RABGGTB     | 5,01     | 1,90        |
| ENSG00000185246 | PRPF39      | 4,93     | 1,81        |
| ENSG00000080824 | HSP90AA1    | 4,93     | 2,94        |
| ENSG00000181061 | HIGD1A      | 4,91     | 2,56        |
| ENSG00000101695 | RNF125      | 4,91     | 5,94        |
| ENSG00000164219 | PGGT1B      | 4,86     | 2,22        |
| ENSG00000177917 | ARL6IP6     | 4,78     | 1,99        |
| ENSG00000163714 | U2SURP      | 4,76     | 1,75        |
| ENSG00000155959 | VBP1        | 4,71     | 2,03        |
| ENSG00000112306 | RPS12       | 4,71     | 4,02        |
| ENSG00000211460 | TSN         | 4,70     | 1,85        |
| ENSG00000198677 | TTC37       | 4,69     | 2,23        |
| ENSG00000108055 | SMC3        | 4,68     | 1,64        |
| ENSG00000174839 | DENND6A     | 4,67     | 2,04        |
| ENSG00000133142 | TCEAL4      | 4,66     | 2,14        |
| ENSG00000173545 | ZNF622      | 4,65     | 2,34        |
| ENSG00000123136 | DDX39A      | 4,63     | 2,33        |
| ENSG00000085274 | MYNN        | 4,62     | 1,76        |
| ENSG00000143344 | RGL1        | 4,61     | 5,56        |
| ENSG00000105379 | ETFB        | 4,55     | 2,15        |
| ENSG00000008018 | PSMB1       | 4,53     | 1,64        |
| ENSG00000115541 | HSPE1       | 4,49     | 4,20        |
| ENSG00000072609 | CHFR        | 4,49     | 1,63        |
| ENSG00000072864 | NDE1        | 4,48     | 2,00        |
| ENSG00000188886 | ASTL        | 4,45     | 1,83        |
| ENSG00000152332 | UHMK1       | 4,44     | 1,92        |
| ENSG00000130935 | NOL11       | 4,44     | 2,00        |
| ENSG00000169251 | NMD3        | 4,43     | 1,79        |
| ENSG00000156515 | HK1         | 4,43     | 2,87        |



| ensembl gene    | gene symbol | Score(d) | Fold Change |
|-----------------|-------------|----------|-------------|
| ENSG00000154723 | ATP5J       | 4,41     | 2,42        |
| ENSG00000198951 | NAGA        | 4,41     | 2,21        |
| ENSG00000241685 | ARPC1A      | 4,41     | 2,21        |
| ENSG00000078043 | PIAS2       | 4,40     | 1,98        |
| ENSG00000131746 | TNS4        | 4,39     | 2,64        |
| ENSG00000100473 | COCH        | 4,38     | 4,15        |
| ENSG00000035681 | NSMAF       | 4,37     | 1,75        |
| ENSG00000114115 | RBP1        | 4,32     | 5,63        |
| ENSG00000180957 | PITPNB      | 4,32     | 2,41        |
| ENSG00000170759 | KIF5B       | 4,32     | 2,10        |
| ENSG00000173486 | FKBP2       | 4,31     | 3,09        |
| ENSG00000060762 | MPC1        | 4,28     | 1,81        |
| ENSG00000120437 | ACAT2       | 4,26     | 2,32        |
| ENSG00000092439 | TRPM7       | 4,26     | 1,65        |
| ENSG00000152133 | GPATCH11    | 4,25     | 1,70        |
| ENSG00000156976 | EIF4A2      | 4,24     | 3,99        |
| ENSG00000165280 | VCP         | 4,21     | 1,44        |
| ENSG00000005075 | POLR2J      | 4,20     | 1,94        |
| ENSG00000077147 | TM9SF3      | 4,18     | 1,37        |
| ENSG00000138231 | DBR1        | 4,18     | 1,72        |
| ENSG00000137776 | SLTM        | 4,18     | 1,76        |
| ENSG00000183340 | JRKL        | 4,17     | 1,79        |
| ENSG00000114062 | UBE3A       | 4,17     | 1,52        |
| ENSG00000164091 | WDR82       | 4,15     | 1,60        |
| ENSG00000105329 | TGFB1       | 4,15     | 2,24        |
| ENSG00000085978 | ATG16L1     | 4,12     | 1,94        |
| ENSG00000114416 | FXR1        | 4,12     | 1,69        |
| ENSG00000256053 | APOPT1      | 4,11     | 2,23        |
| ENSG00000101928 | MOSPD1      | 4,09     | 1,63        |
| ENSG00000274523 | RCC1L       | 4,09     | 1,41        |
| ENSG00000244624 | KRTAP20-1   | 4,08     | 3,16        |
| ENSG00000134697 | GNL2        | 4,08     | 2,03        |
| ENSG00000147251 | DOCK11      | 4,07     | 2,58        |
| ENSG00000083168 | KAT6A       | 4,04     | 1,45        |
| ENSG00000099783 | HNRNPM      | 4,04     | 1,83        |
| ENSG00000165219 | GAPVD1      | 4,03     | 1,53        |
| ENSG00000147155 | EBP         | 4,02     | 1,88        |
| ENSG00000134313 | KIDINS220   | 4,02     | 2,23        |
| ENSG00000170242 | USP47       | 4,01     | 2,36        |
| ENSG00000198836 | OPA1        | 4,01     | 1,79        |
| ENSG00000165644 | COMTD1      | 4,00     | 1,72        |
| ENSG00000158669 | GPAT4       | 4,00     | 1,65        |
| ENSG00000176485 | PLA2G16     | 4,00     | 3,22        |
| ENSG00000092201 | SUPT16H     | 3,99     | 1,60        |
| ENSG00000165650 | PDZD8       | 3,98     | 1,94        |
| ENSG00000260286 | C6orf229    | 3,98     | 1,44        |
| ENSG00000140829 | DHX38       | 3,98     | 1,47        |
| ENSG00000125352 | RNF113A     | 3,95     | 1,61        |
| ENSG00000196141 | SPATS2L     | 3,94     | 3,48        |

| ensembl gene    | gene symbol | Score(d) | Fold Change |
|-----------------|-------------|----------|-------------|
| ENSG00000064419 | TNPO3       | 3,94     | 1,51        |
| ENSG00000236334 | PPIAL4G     | 3,93     | 1,94        |
| ENSG00000130489 | SCO2        | 3,93     | 1,59        |
| ENSG00000144567 | FAM134A     | 3,92     | 1,92        |
| ENSG00000196705 | ZNF431      | 3,92     | 1,72        |
| ENSG00000182552 | RWDD4       | 3,90     | 3,10        |
| ENSG00000204659 | CBY3        | 3,89     | 1,74        |
| ENSG00000067167 | TRAM1       | 3,89     | 1,39        |
| ENSG00000167553 | TUBA1C      | 3,88     | 1,46        |
| ENSG00000101146 | RAE1        | 3,88     | 1,62        |
| ENSG00000180185 | FAHD1       | 3,88     | 1,50        |
| ENSG00000236637 | IFNA4       | 3,87     | 1,84        |
| ENSG00000173598 | NUDT4       | 3,86     | 2,22        |
| ENSG00000183648 | NDUFB1      | 3,86     | 3,77        |
| ENSG00000185627 | PSMD13      | 3,85     | 2,13        |
| ENSG00000150779 | TIMM8B      | 3,85     | 1,97        |
| ENSG00000113141 | IK          | 3,85     | 1,89        |
| ENSG00000147140 | NONO        | 3,83     | 1,71        |
| ENSG00000072182 | ASIC4       | 3,83     | 1,38        |
| ENSG00000128534 | LSM8        | 3,83     | 1,79        |
| ENSG00000109445 | ZNF330      | 3,82     | 1,95        |
| ENSG00000118242 | MREG        | 3,82     | 2,65        |
| ENSG00000095485 | CWF19L1     | 3,81     | 1,58        |
| ENSG00000137404 | NRM         | 3,81     | 1,82        |
| ENSG00000197323 | TRIM33      | 3,80     | 1,59        |
| ENSG00000088320 | REM1        | 3,80     | 1,31        |
| ENSG00000105639 | JAK3        | 3,79     | 2,31        |
| ENSG00000105409 | ATP1A3      | 3,78     | 2,32        |
| ENSG00000130827 | PLXNA3      | 3,78     | 2,14        |
| ENSG00000166200 | COPS2       | 3,78     | 1,68        |
| ENSG00000007168 | PAFAH1B1    | 3,77     | 1,67        |
| ENSG00000164944 | KIAA1429    | 3,76     | 1,81        |
| ENSG00000137154 | RPS6        | 3,76     | 2,04        |
| ENSG00000103342 | GSPT1       | 3,76     | 2,30        |
| ENSG00000116704 | SLC35D1     | 3,75     | 1,85        |
| ENSG00000236543 | RP11-98L5.5 | 3,74     | 1,74        |
| ENSG00000115963 | RND3        | 3,74     | 7,35        |
| ENSG00000125726 | CD70        | 3,74     | 1,60        |
| ENSG00000163041 | H3F3A       | 3,73     | 2,08        |
| ENSG00000196550 | FAM72A      | 3,73     | 1,65        |
| ENSG00000115816 | CEBPZ       | 3,73     | 1,94        |
| ENSG00000102001 | CACNA1F     | 3,73     | 2,11        |
| ENSG00000118804 | STBD1       | 3,72     | 1,84        |
| ENSG00000165194 | PCDH19      | 3,72     | 2,03        |
| ENSG00000163618 | CADPS       | 3,71     | 5,38        |
| ENSG00000100243 | CYB5R3      | 3,71     | 1,53        |
| ENSG00000112081 | SRSF3       | 3,71     | 1,34        |
| ENSG00000196950 | SLC39A10    | 3,69     | 1,89        |
| ENSG00000137073 | UBAP2       | 3,69     | 1,48        |

| ensembl gene    | gene symbol | Score(d) | Fold Change |
|-----------------|-------------|----------|-------------|
| ENSG00000214309 | MBLAC1      | 3,69     | 2,49        |
| ENSG00000167720 | SRR         | 3,68     | 1,84        |
| ENSG00000007520 | TSR3        | 3,68     | 1,90        |
| ENSG00000163162 | RNF149      | 3,67     | 2,37        |
| ENSG00000173692 | PSMD1       | 3,67     | 1,47        |
| ENSG00000132823 | OSER1       | 3,65     | 2,13        |
| ENSG00000240065 | PSMB9       | 3,65     | 2,40        |
| ENSG00000101844 | ATG4A       | 3,65     | 1,69        |
| ENSG00000163584 | RPL22L1     | 3,64     | 3,82        |
| ENSG00000105258 | POLR2I      | 3,64     | 1,70        |
| ENSG00000204388 | HSPA1B      | 3,64     | 5,03        |
| ENSG00000197540 | GZMM        | 3,64     | 1,40        |
| ENSG00000155380 | SLC16A1     | 3,63     | 2,24        |
| ENSG00000119041 | GTF3C3      | 3,62     | 1,93        |
| ENSG00000144741 | SLC25A26    | 3,62     | 1,59        |
| ENSG00000187170 | LCE4A       | 3,62     | 1,42        |
| ENSG00000128191 | DGCR8       | 3,61     | 1,79        |
| ENSG00000068366 | ACSL4       | 3,61     | 2,64        |
| ENSG00000110660 | SLC35F2     | 3,61     | 2,21        |
| ENSG00000125944 | HNRNPR      | 3,61     | 1,80        |
| ENSG00000136718 | IMP4        | 3,61     | 1,75        |
| ENSG00000197647 | ZNF433      | 3,61     | 4,22        |
| ENSG00000133328 | HRASLS2     | 3,61     | 3,31        |
| ENSG00000136930 | PSMB7       | 3,60     | 1,68        |
| ENSG00000166226 | CCT2        | 3,60     | 2,19        |
| ENSG00000042286 | AIFM2       | 3,59     | 1,53        |
| ENSG00000162645 | GBP2        | 3,58     | 7,63        |
| ENSG00000143774 | GUK1        | 3,58     | 1,46        |
| ENSG00000158526 | TSR2        | 3,57     | 1,60        |
| ENSG00000120438 | TCP1        | 3,57     | 1,50        |
| ENSG00000175110 | MRPS22      | 3,57     | 1,65        |
| ENSG00000187189 | TSPYL4      | 3,57     | 1,37        |
| ENSG00000121691 | CAT         | 3,56     | 2,03        |
| ENSG00000151917 | BEND6       | 3,55     | 1,90        |
| ENSG00000135269 | TES         | 3,55     | 2,24        |
| ENSG00000152936 | LMNTD1      | 3,55     | 1,79        |
| ENSG00000110628 | SLC22A18    | 3,55     | 1,77        |
| ENSG00000037474 | NSUN2       | 3,55     | 1,80        |
| ENSG00000214706 | IFRD2       | 3,55     | 1,66        |
| ENSG00000118454 | ANKRD13C    | 3,54     | 1,63        |
| ENSG00000171102 | OBP2B       | 3,54     | 2,23        |
| ENSG00000163904 | SENP2       | 3,54     | 1,77        |
| ENSG00000171960 | PPIH        | 3,54     | 1,63        |
| ENSG00000125454 | SLC25A19    | 3,54     | 1,98        |
| ENSG00000177432 | NAP1L5      | 3,53     | 1,44        |
| ENSG00000166479 | TMX3        | 3,53     | 1,69        |
| ENSG00000166311 | SMPD1       | 3,53     | 2,04        |
| ENSG00000186792 | HYAL3       | 3,53     | 1,65        |
| ENSG00000177370 | TIMM22      | 3,53     | 1,66        |

| ensembl gene    | gene symbol | Score(d) | Fold Change |
|-----------------|-------------|----------|-------------|
| ENSG00000174749 | C4orf32     | 3,53     | 2,22        |
| ENSG00000198231 | DDX42       | 3,53     | 1,68        |
| ENSG00000151470 | C4orf33     | 3,52     | 2,85        |
| ENSG00000185947 | ZNF267      | 3,52     | 2,71        |
| ENSG00000241258 | CRCP        | 3,52     | 1,90        |
| ENSG00000162433 | AK4         | 3,50     | 2,00        |
| ENSG00000111142 | METAP2      | 3,50     | 1,58        |
| ENSG00000198034 | RPS4X       | 3,50     | 1,47        |
| ENSG00000134186 | PRPF38B     | 3,50     | 1,76        |
| ENSG00000068903 | SIRT2       | 3,49     | 2,17        |
| ENSG00000275700 | AATF        | 3,49     | 2,09        |
| ENSG00000265241 | RBM8A       | 3,49     | 1,97        |
| ENSG00000086061 | DNAJA1      | 3,49     | 2,05        |
| ENSG00000164615 | CAMLG       | 3,49     | 1,50        |
| ENSG00000013364 | MVP         | 3,49     | 3,30        |
| ENSG00000179950 | PUF60       | 3,48     | 1,61        |
| ENSG00000204843 | DCTN1       | 3,48     | 1,60        |
| ENSG00000145022 | TCTA        | 3,47     | 1,69        |
| ENSG00000186577 | C6orf1      | 3,47     | 1,60        |
| ENSG00000149136 | SSRP1       | 3,46     | 2,38        |
| ENSG00000178287 | SPAG11A     | 3,46     | 2,18        |
| ENSG00000103257 | SLC7A5      | 3,45     | 2,53        |
| ENSG00000183527 | PSMG1       | 3,45     | 1,92        |
| ENSG00000196072 | BLOC1S2     | 3,45     | 2,03        |
| ENSG00000082153 | BZW1        | 3,44     | 1,91        |
| ENSG00000175416 | CLTB        | 3,44     | 1,74        |
| ENSG00000129083 | COPB1       | 3,44     | 3,51        |
| ENSG00000171566 | PLRG1       | 3,43     | 2,02        |
| ENSG00000237190 | CDKN2AIPNL  | 3,43     | 1,70        |
| ENSG00000087510 | TFAP2C      | 3,43     | 1,57        |
| ENSG00000175105 | ZNF654      | 3,43     | 1,69        |
| ENSG00000163518 | FCRL4       | 3,43     | 1,87        |
| ENSG00000162368 | CMPK1       | 3,41     | 1,45        |
| ENSG00000176531 | PHLDB3      | 3,41     | 1,66        |
| ENSG00000099624 | ATP5D       | 3,41     | 1,59        |
| ENSG00000171497 | PPID        | 3,41     | 1,98        |
| ENSG00000166710 | B2M         | 3,41     | 1,52        |
| ENSG00000069509 | FUNDC1      | 3,39     | 1,61        |
| ENSG00000109586 | GALNT7      | 3,39     | 1,84        |
| ENSG00000179059 | ZFP42       | 3,39     | 1,52        |
| ENSG00000151576 | QTRT2       | 3,39     | 1,65        |
| ENSG00000107581 | EIF3A       | 3,39     | 1,40        |
| ENSG00000197106 | SLC6A17     | 3,39     | 1,65        |
| ENSG00000155622 | XAGE2       | 3,39     | 1,36        |
| ENSG00000185633 | NDUFA4L2    | 3,38     | 1,91        |
| ENSG00000277791 | PSMB3       | 3,37     | 1,70        |
| ENSG00000123892 | RAB38       | 3,37     | 1,67        |
| ENSG00000273540 | AGBL1       | 3,37     | 1,50        |
| ENSG00000198695 | MT-ND6      | 3,37     | 2,07        |

| ensembl gene    | gene symbol   | Score(d) | Fold Change |
|-----------------|---------------|----------|-------------|
| ENSG00000162783 | IER5          | 3,36     | 2,24        |
| ENSG00000204264 | PSMB8         | 3,36     | 3,38        |
| ENSG00000165521 | EML5          | 3,34     | 2,49        |
| ENSG00000116852 | KIF21B        | 3,33     | 1,89        |
| ENSG00000196924 | FLNA          | 3,33     | 2,72        |
| ENSG00000151778 | SERP2         | 3,32     | 1,72        |
| ENSG00000272899 | RP11-309L24.4 | 3,32     | 1,73        |
| ENSG00000134802 | SLC43A3       | 3,32     | 2,64        |
| ENSG00000154518 | ATP5G3        | 3,31     | 1,76        |
| ENSG00000169436 | COL22A1       | 3,31     | 1,83        |
| ENSG00000105851 | PIK3CG        | 3,30     | 2,26        |
| ENSG00000110075 | PPP6R3        | 3,30     | 1,38        |
| ENSG00000067533 | RRP15         | 3,30     | 1,81        |
| ENSG00000164209 | SLC25A46      | 3,30     | 1,56        |
| ENSG00000196214 | ZNF766        | 3,30     | 1,96        |
| ENSG00000013588 | GPRC5A        | 3,30     | 2,31        |
| ENSG00000142227 | EMP3          | 3,29     | 1,70        |
| ENSG00000100796 | PPP4R3A       | 3,29     | 1,65        |
| ENSG00000147381 | MAGEA4        | 3,29     | 1,65        |
| ENSG00000221989 | OR2A2         | 3,29     | 1,68        |
| ENSG00000160799 | CCDC12        | 3,29     | 1,75        |
| ENSG00000100867 | DHRS2         | 3,29     | 1,31        |
| ENSG00000173432 | SAA1          | 3,29     | 1,81        |
| ENSG00000228607 | CLDN25        | 3,28     | 1,32        |
| ENSG00000278540 | ACACA         | 3,28     | 1,72        |
| ENSG00000168454 | TXNDC2        | 3,28     | 1,42        |
| ENSG00000113575 | PPP2CA        | 3,28     | 2,00        |
| ENSG00000127328 | RAB3IP        | 3,28     | 1,69        |
| ENSG00000103489 | XYLT1         | 3,28     | 4,55        |
| ENSG00000092199 | HNRNPC        | 3,27     | 1,30        |
| ENSG00000137251 | TINAG         | 3,27     | 1,62        |
| ENSG00000204370 | SDHD          | 3,27     | 2,09        |
| ENSG00000274068 | RP11-475E11.9 | 3,27     | 1,64        |
| ENSG00000099800 | TIMM13        | 3,27     | 2,60        |
| ENSG00000197969 | VPS13A        | 3,27     | 1,62        |
| ENSG00000138495 | COX17         | 3,26     | 2,54        |
| ENSG00000078596 | ITM2A         | 3,26     | 2,02        |
| ENSG00000100056 | DGCR14        | 3,26     | 1,43        |
| ENSG00000205189 | ZBTB10        | 3,26     | 3,05        |
| ENSG00000166888 | STAT6         | 3,24     | 1,65        |
| ENSG00000178586 | OR6B3         | 3,24     | 1,44        |
| ENSG00000255302 | EID1          | 3,24     | 1,57        |
| ENSG00000213231 | TCL1B         | 3,24     | 3,46        |
| ENSG00000115840 | SLC25A12      | 3,24     | 1,80        |
| ENSG00000169567 | HINT1         | 3,23     | 1,50        |
| ENSG00000175868 | CALCB         | 3,23     | 2,09        |
| ENSG00000170791 | CHCHD7        | 3,23     | 1,95        |
| ENSG00000126460 | PRRG2         | 3,23     | 1,31        |
| ENSG00000085788 | DDHD2         | 3,23     | 1,47        |

| ensembl gene    | gene symbol | Score(d) | Fold Change |
|-----------------|-------------|----------|-------------|
| ENSG00000266412 | NCOA4       | 3,22     | 2,15        |
| ENSG00000172893 | DHCR7       | 3,22     | 1,74        |
| ENSG00000104894 | CD37        | 3,22     | 2,87        |
| ENSG00000129473 | BCL2L2      | 3,22     | 1,90        |
| ENSG00000177684 | DEFB114     | 3,22     | 1,46        |
| ENSG00000100316 | RPL3        | 3,22     | 1,63        |
| ENSG00000176920 | FUT2        | 3,21     | 1,42        |
| ENSG00000181744 | C3orf58     | 3,21     | 2,25        |
| ENSG00000189046 | ALKBH2      | 3,20     | 2,08        |
| ENSG00000023228 | NDUFS1      | 3,20     | 1,55        |
| ENSG00000005243 | COPZ2       | 3,20     | 2,59        |
| ENSG00000116183 | PAPPA2      | 3,19     | 1,32        |
| ENSG00000128641 | MYO1B       | 3,19     | 3,34        |
| ENSG00000214194 | LINC00998   | 3,19     | 1,82        |
| ENSG00000100297 | MCM5        | 3,19     | 1,60        |
| ENSG00000136754 | ABI1        | 3,19     | 1,52        |
| ENSG00000102271 | KLHL4       | 3,19     | 5,79        |
| ENSG00000136630 | HLX         | 3,18     | 2,18        |
| ENSG00000056097 | ZFR         | 3,18     | 1,64        |
| ENSG00000204314 | PRRT1       | 3,18     | 1,58        |
| ENSG00000108671 | PSMD11      | 3,17     | 1,35        |
| ENSG00000107593 | PKD2L1      | 3,17     | 1,49        |
| ENSG00000174780 | SRP72       | 3,16     | 1,35        |
| ENSG00000135404 | CD63        | 3,16     | 2,02        |
| ENSG00000138785 | INTS12      | 3,16     | 1,52        |
| ENSG00000171931 | FBXW10      | 3,15     | 1,39        |
| ENSG00000214954 | LRRC69      | 3,15     | 1,59        |
| ENSG00000238205 | MPC1L       | 3,14     | 1,27        |
| ENSG00000123144 | C19orf43    | 3,14     | 1,70        |
| ENSG00000160185 | UBASH3A     | 3,14     | 1,22        |
| ENSG00000165637 | VDAC2       | 3,14     | 1,34        |
| ENSG00000169126 | ARMC4       | 3,14     | 2,63        |
| ENSG00000213638 | ADAT3       | 3,14     | 1,70        |
| ENSG00000119285 | HEATR1      | 3,14     | 1,97        |
| ENSG00000104885 | DOT1L       | 3,14     | 1,39        |
| ENSG00000057757 | PITHD1      | 3,14     | 1,48        |
| ENSG00000125492 | BARHL1      | 3,13     | 1,37        |
| ENSG00000018510 | AGPS        | 3,13     | 1,60        |
| ENSG00000144681 | STAC        | 3,13     | 1,69        |
| ENSG00000172175 | MALT1       | 3,13     | 1,82        |
| ENSG00000136536 | 42801       | 3,13     | 1,68        |
| ENSG00000143815 | LBR         | 3,13     | 1,90        |
| ENSG00000124191 | TOX2        | 3,12     | 2,22        |
| ENSG00000137876 | RSL24D1     | 3,12     | 1,87        |
| ENSG00000147724 | FAM135B     | 3,12     | 1,63        |
| ENSG00000131668 | BARX1       | 3,12     | 1,31        |
| ENSG00000046774 | MAGEC2      | 3,12     | 1,53        |
| ENSG00000204387 | C6orf48     | 3,11     | 1,85        |
| ENSG00000115761 | NOL10       | 3,11     | 1,59        |

| ensembl gene    | gene symbol | Score(d) | Fold Change |
|-----------------|-------------|----------|-------------|
| ENSG00000159961 | OR3A3       | 3,11     | 1,56        |
| ENSG00000196131 | VN1R2       | 3,11     | 1,84        |
| ENSG00000134160 | TRPM1       | 3,11     | 1,28        |
| ENSG00000153574 | RPIA        | 3,11     | 1,57        |
| ENSG00000129910 | CDH15       | 3,11     | 1,51        |
| ENSG00000172262 | ZNF131      | 3,10     | 1,47        |
| ENSG00000183166 | CALN1       | 3,10     | 1,44        |
| ENSG00000157322 | CLEC18A     | 3,10     | 1,36        |
| ENSG00000105671 | DDX49       | 3,09     | 1,56        |
| ENSG00000110243 | APOA5       | 3,09     | 1,27        |
| ENSG00000041802 | LSG1        | 3,09     | 1,58        |
| ENSG00000055044 | NOP58       | 3,09     | 1,55        |
| ENSG00000115170 | ACVR1       | 3,08     | 1,80        |
| ENSG00000168209 | DDIT4       | 3,08     | 2,76        |
| ENSG00000112972 | HMGCS1      | 3,08     | 1,68        |
| ENSG00000023191 | RNH1        | 3,08     | 1,88        |
| ENSG00000100097 | LGALS1      | 3,07     | 2,05        |
| ENSG00000125457 | MIF4GD      | 3,07     | 1,75        |
| ENSG00000163636 | PSMD6       | 3,07     | 1,56        |
| ENSG00000132872 | SYT4        | 3,07     | 1,48        |
| ENSG00000031823 | RANBP3      | 3,07     | 1,24        |
| ENSG00000060982 | BCAT1       | 3,07     | 4,43        |
| ENSG00000108061 | SHOC2       | 3,07     | 1,43        |
| ENSG00000141543 | EIF4A3      | 3,07     | 1,93        |
| ENSG00000114784 | EIF1B       | 3,07     | 2,09        |
| ENSG00000179010 | MRFAP1      | 3,06     | 1,89        |
| ENSG00000139977 | NAA30       | 3,06     | 1,56        |
| ENSG00000125970 | RALY        | 3,05     | 1,93        |
| ENSG00000119541 | VPS4B       | 3,05     | 1,66        |
| ENSG00000145365 | TIFA        | 3,04     | 1,81        |
| ENSG00000113810 | SMC4        | 3,04     | 1,63        |
| ENSG00000196660 | SLC30A10    | 3,04     | 1,25        |
| ENSG00000095574 | IKZF5       | 3,04     | 1,64        |
| ENSG00000130254 | SAFB2       | 3,04     | 1,84        |
| ENSG00000176410 | DNAJC30     | 3,03     | 1,32        |
| ENSG00000153879 | CEBPG       | 3,03     | 1,69        |
| ENSG00000130703 | OSBPL2      | 3,03     | 1,38        |
| ENSG00000105699 | LSR         | 3,03     | 1,72        |
| ENSG00000087266 | SH3BP2      | 3,03     | 2,00        |
| ENSG00000198271 | KRTAP4-5    | 3,03     | 1,47        |
| ENSG00000112031 | MTRF1L      | 3,03     | 1,88        |
| ENSG00000113758 | DBN1        | 3,03     | 2,01        |
| ENSG00000100629 | CEP128      | 3,03     | 2,14        |
| ENSG00000115267 | IFIH1       | 3,02     | 1,83        |
| ENSG00000269556 | TMEM185A    | 3,02     | 1,50        |
| ENSG00000089234 | BRAP        | 3,02     | 1,51        |
| ENSG00000111727 | HCFC2       | 3,02     | 2,50        |
| ENSG00000163900 | TMEM41A     | 3,02     | 1,80        |
| ENSG00000165733 | BMS1        | 3,02     | 1,52        |

| ensembl gene    | gene symbol | Score(d) | Fold Change |
|-----------------|-------------|----------|-------------|
| ENSG00000138794 | CASP6       | 3,01     | 1,78        |
| ENSG00000215301 | DDX3X       | 3,01     | 1,61        |
| ENSG00000048544 | MRPS10      | 3,01     | 1,57        |
| ENSG00000139697 | SBNO1       | 3,01     | 1,52        |
| ENSG00000102241 | HTATSF1     | 3,01     | 1,60        |
| ENSG00000170881 | RNF139      | 3,00     | 1,48        |
| ENSG00000118513 | MYB         | 3,00     | 2,29        |
| ENSG00000101670 | LIPG        | 3,00     | 1,80        |
| ENSG00000068308 | OTUD5       | 3,00     | 1,44        |
| ENSG00000134987 | WDR36       | 3,00     | 1,59        |
| ENSG00000087191 | PSMC5       | 3,00     | 2,02        |
| ENSG00000141076 | UTP4        | 3,00     | 1,99        |
| ENSG00000150676 | CCDC83      | 2,99     | 1,46        |
| ENSG00000186868 | MAPT        | 2,99     | 1,35        |
| ENSG00000107164 | FUBP3       | 2,99     | 1,34        |
| ENSG00000101972 | STAG2       | 2,99     | 1,56        |
| ENSG00000091436 | AC013461.1  | 2,99     | 2,21        |
| ENSG00000184575 | XPOT        | 2,98     | 2,03        |
| ENSG00000164175 | SLC45A2     | 2,98     | 1,74        |
| ENSG00000147526 | TACC1       | 2,98     | 3,09        |
| ENSG00000075975 | MKRN2       | 2,98     | 1,46        |
| ENSG00000168539 | CHRM1       | 2,98     | 1,28        |
| ENSG00000183747 | ACSM2A      | 2,97     | 1,61        |
| ENSG00000183520 | UTP11       | 2,97     | 1,66        |
| ENSG00000079134 | THOC1       | 2,97     | 1,47        |
| ENSG00000163541 | SUCLG1      | 2,97     | 1,62        |
| ENSG00000171987 | C11orf40    | 2,97     | 1,22        |
| ENSG00000196361 | ELAVL3      | 2,96     | 1,71        |
| ENSG00000151729 | SLC25A4     | 2,96     | 2,23        |
| ENSG00000170619 | COMMD5      | 2,96     | 1,35        |
| ENSG00000144895 | EIF2A       | 2,96     | 1,60        |
| ENSG00000103266 | STUB1       | 2,95     | 1,60        |
| ENSG00000197885 | NKIRAS1     | 2,95     | 2,41        |
| ENSG00000181826 | RELL1       | 2,95     | 2,04        |
| ENSG00000186509 | OR9Q1       | 2,95     | 1,51        |
| ENSG00000158715 | SLC45A3     | 2,95     | 1,40        |
| ENSG00000169488 | OR4K15      | 2,95     | 1,29        |
| ENSG00000103978 | TMEM87A     | 2,95     | 1,55        |
| ENSG00000065978 | YBX1        | 2,95     | 1,58        |
| ENSG00000106397 | PLOD3       | 2,95     | 2,04        |
| ENSG00000266338 | NBPF15      | 2,94     | 1,72        |
| ENSG00000109193 | SULT1E1     | 2,94     | 1,39        |
| ENSG00000076003 | MCM6        | 2,94     | 1,95        |
| ENSG00000157045 | NTAN1       | 2,94     | 2,10        |
| ENSG00000133321 | RARRES3     | 2,94     | 3,33        |
| ENSG00000165006 | UBAP1       | 2,93     | 1,68        |
| ENSG00000164172 | MOCS2       | 2,93     | 1,99        |
| ENSG00000161203 | AP2M1       | 2,93     | 1,81        |
| ENSG00000170088 | TMEM192     | 2,93     | 1,49        |



| ensembl gene    | gene symbol | Score(d) | Fold Change |
|-----------------|-------------|----------|-------------|
| ENSG00000071537 | SEL1L       | 2,93     | 1,63        |
| ENSG00000206557 | TRIM71      | 2,93     | 1,32        |
| ENSG00000107960 | OBFC1       | 2,93     | 1,63        |
| ENSG00000101057 | MYBL2       | 2,93     | 1,60        |
| ENSG00000105193 | RPS16       | 2,93     | 2,79        |
| ENSG00000100003 | SEC14L2     | 2,93     | 2,72        |
| ENSG00000168438 | CDC40       | 2,93     | 1,59        |
| ENSG00000144029 | MRPS5       | 2,93     | 1,44        |
| ENSG00000158615 | PPP1R15B    | 2,93     | 1,50        |
| ENSG00000179826 | MRGPRX3     | 2,93     | 1,49        |
| ENSG00000269404 | SPIB        | 2,93     | 2,10        |
| ENSG00000181264 | TMEM136     | 2,92     | 2,60        |
| ENSG00000197125 | OR8B8       | 2,92     | 1,36        |
| ENSG00000115339 | GALNT3      | 2,92     | 4,58        |
| ENSG00000166012 | TAF1D       | 2,92     | 2,02        |
| ENSG00000137100 | DCTN3       | 2,92     | 1,82        |
| ENSG00000187231 | SESTD1      | 2,92     | 4,43        |
| ENSG00000162520 | SYNC        | 2,92     | 1,36        |
| ENSG00000184162 | NR2C2AP     | 2,92     | 1,50        |
| ENSG00000186480 | INSIG1      | 2,92     | 2,06        |
| ENSG00000140105 | WARS        | 2,92     | 1,98        |
| ENSG00000188372 | ZP3         | 2,91     | 2,26        |
| ENSG00000130766 | SESN2       | 2,91     | 2,59        |
| ENSG00000188295 | ZNF669      | 2,91     | 1,39        |
| ENSG00000163319 | MRPS18C     | 2,91     | 1,48        |
| ENSG00000171858 | RPS21       | 2,91     | 2,50        |
| ENSG00000163898 | LIPH        | 2,91     | 3,62        |
| ENSG00000102119 | EMD         | 2,90     | 1,59        |
| ENSG00000205186 | FABP9       | 2,90     | 1,27        |
| ENSG00000006007 | GDE1        | 2,90     | 1,51        |
| ENSG00000162909 | CAPN2       | 2,90     | 2,51        |
| ENSG00000172020 | GAP43       | 2,90     | 1,38        |
| ENSG00000197343 | ZNF655      | 2,90     | 1,64        |
| ENSG00000073584 | SMARCE1     | 2,89     | 1,62        |
| ENSG00000124134 | KCNS1       | 2,89     | 1,23        |
| ENSG00000061794 | MRPS35      | 2,89     | 2,22        |
| ENSG00000156697 | UTP14A      | 2,89     | 1,40        |
| ENSG00000007237 | GAS7        | 2,89     | 2,63        |
| ENSG00000206026 | SMIM21      | 2,89     | 1,44        |
| ENSG00000134198 | TSPAN2      | 2,89     | 3,60        |
| ENSG00000147274 | RBMX        | 2,88     | 1,58        |
| ENSG00000183891 | TTC32       | 2,88     | 2,28        |
| ENSG00000107625 | DDX50       | 2,88     | 1,76        |
| ENSG00000179051 | RCC2        | 2,88     | 1,55        |
| ENSG00000241123 | KRTAP10-5   | 2,88     | 1,45        |
| ENSG00000080709 | KCNN2       | 2,87     | 1,50        |
| ENSG00000138182 | KIF20B      | 2,87     | 1,94        |
| ENSG00000128609 | NDUFA5      | 2,87     | 1,57        |
| ENSG00000106245 | BUD31       | 2,87     | 1,79        |

| ensembl gene    | gene symbol   | Score(d) | Fold Change |
|-----------------|---------------|----------|-------------|
| ENSG00000158411 | MITD1         | 2,87     | 1,45        |
| ENSG00000031698 | SARS          | 2,87     | 1,87        |
| ENSG00000163743 | RCHY1         | 2,86     | 1,66        |
| ENSG00000109111 | SUPT6H        | 2,86     | 1,49        |
| ENSG00000261341 | CTD-2568A17.1 | 2,86     | 1,44        |
| ENSG00000123983 | ACSL3         | 2,86     | 1,69        |
| ENSG00000137818 | RPLP1         | 2,86     | 1,72        |
| ENSG00000171130 | ATP6V0E2      | 2,86     | 1,51        |
| ENSG00000115944 | COX7A2L       | 2,85     | 1,91        |
| ENSG00000134265 | NAPG          | 2,85     | 1,42        |
| ENSG00000170185 | USP38         | 2,85     | 1,58        |
| ENSG00000188725 | SMIM15        | 2,85     | 1,27        |
| ENSG00000206073 | SERPINB4      | 2,85     | 1,41        |
| ENSG00000176294 | OR4N2         | 2,85     | 2,07        |
| ENSG00000129654 | FOXJ1         | 2,85     | 1,46        |
| ENSG00000134597 | RBMX2         | 2,85     | 1,58        |
| ENSG00000101911 | PRPS2         | 2,84     | 1,91        |
| ENSG00000204161 | C10orf128     | 2,84     | 1,78        |
| ENSG00000105321 | CCDC9         | 2,84     | 1,77        |
| ENSG00000145632 | PLK2          | 2,84     | 3,39        |
| ENSG00000198431 | TXNRD1        | 2,84     | 1,48        |
| ENSG00000139343 | SNRPF         | 2,84     | 1,73        |
| ENSG00000144747 | TMF1          | 2,84     | 1,65        |
| ENSG00000130023 | ERMARD        | 2,84     | 1,48        |
| ENSG00000132792 | CTNBNB1       | 2,84     | 1,55        |
| ENSG00000213341 | CHUK          | 2,83     | 1,77        |
| ENSG00000075413 | MARK3         | 2,83     | 1,31        |
| ENSG00000183379 | SYNDIG1L      | 2,83     | 1,39        |
| ENSG00000112651 | MRPL2         | 2,83     | 1,63        |
| ENSG00000102195 | GPR50         | 2,83     | 1,30        |
| ENSG00000178498 | DTX3          | 2,83     | 1,77        |
| ENSG00000135249 | RINT1         | 2,82     | 1,44        |
| ENSG00000182698 | RESP18        | 2,82     | 1,29        |
| ENSG00000174775 | HRAS          | 2,82     | 1,24        |
| ENSG00000183287 | CCBE1         | 2,82     | 1,41        |
| ENSG00000142871 | CYR61         | 2,82     | 1,51        |
| ENSG00000215375 | MYL5          | 2,82     | 1,39        |
| ENSG00000101222 | SPEF1         | 2,82     | 1,29        |
| ENSG00000142544 | CTU1          | 2,81     | 1,35        |
| ENSG00000091039 | OSBPL8        | 2,81     | 1,44        |
| ENSG00000159259 | CHAF1B        | 2,81     | 1,97        |
| ENSG00000147874 | HAUS6         | 2,81     | 1,61        |
| ENSG00000158639 | PAGE5         | 2,81     | 1,84        |
| ENSG00000186838 | SELV          | 2,81     | 1,22        |
| ENSG00000170775 | GPR37         | 2,81     | 2,20        |
| ENSG00000105668 | UPK1A         | 2,81     | 1,26        |
| ENSG00000183378 | OVCH2         | 2,80     | 1,33        |
| ENSG00000259075 | POC1B-GALNT4  | 2,80     | 2,10        |
| ENSG00000198848 | CES1          | 2,80     | 1,49        |

| ensembl gene    | gene symbol | Score(d) | Fold Change |
|-----------------|-------------|----------|-------------|
| ENSG00000130544 | ZNF557      | 2,80     | 1,45        |
| ENSG00000186806 | VSIG10L     | 2,80     | 1,45        |
| ENSG00000114209 | PDCD10      | 2,79     | 1,66        |
| ENSG00000176783 | RUFY1       | 2,79     | 1,79        |
| ENSG00000187824 | TMEM220     | 2,79     | 1,89        |
| ENSG00000168724 | DNAJC21     | 2,79     | 1,33        |
| ENSG00000155729 | KCTD18      | 2,79     | 1,47        |
| ENSG00000204642 | HLA-F       | 2,79     | 1,39        |
| ENSG00000159261 | CLDN14      | 2,79     | 2,06        |
| ENSG00000105507 | CABP5       | 2,79     | 1,32        |
| ENSG00000058729 | RIOK2       | 2,79     | 1,50        |
| ENSG00000160310 | PRMT2       | 2,78     | 1,54        |
| ENSG00000081014 | AP4E1       | 2,78     | 1,42        |
| ENSG00000147180 | ZNF711      | 2,78     | 2,00        |
| ENSG00000101474 | APMAP       | 2,78     | 1,48        |
| ENSG00000006125 | AP2B1       | 2,78     | 1,66        |
| ENSG00000171314 | PGAM1       | 2,78     | 1,85        |
| ENSG00000186795 | KCNK18      | 2,78     | 1,24        |
| ENSG00000074755 | ZZEF1       | 2,78     | 1,51        |
| ENSG00000182557 | SPNS3       | 2,78     | 1,62        |
| ENSG00000151552 | QDPR        | 2,78     | 1,55        |
| ENSG00000123728 | RAP2C       | 2,77     | 1,48        |
| ENSG00000155330 | C16orf87    | 2,77     | 2,02        |
| ENSG00000178965 | ERICH3      | 2,77     | 1,70        |
| ENSG00000197928 | ZNF677      | 2,77     | 2,49        |
| ENSG00000156127 | BATF        | 2,77     | 1,44        |
| ENSG00000171425 | ZNF581      | 2,77     | 1,64        |
| ENSG00000117984 | CTSD        | 2,77     | 1,41        |
| ENSG00000091140 | DLD         | 2,77     | 1,78        |
| ENSG00000177971 | IMP3        | 2,77     | 1,42        |
| ENSG00000184945 | AQP12A      | 2,77     | 1,38        |
| ENSG00000137824 | RMDN3       | 2,77     | 1,31        |
| ENSG00000115241 | PPM1G       | 2,76     | 1,38        |
| ENSG00000156261 | CCT8        | 2,76     | 1,88        |
| ENSG00000140374 | ETFA        | 2,76     | 1,75        |
| ENSG00000140612 | SEC11A      | 2,76     | 1,92        |
| ENSG00000123505 | AMD1        | 2,76     | 1,52        |
| ENSG00000108094 | CUL2        | 2,76     | 1,42        |
| ENSG00000166292 | TMEM100     | 2,76     | 1,32        |
| ENSG00000168890 | TMEM150A    | 2,76     | 1,74        |
| ENSG00000243910 | TUBA4B      | 2,75     | 1,34        |
| ENSG00000065621 | GSTO2       | 2,75     | 1,95        |
| ENSG00000123143 | PKN1        | 2,75     | 1,67        |
| ENSG00000017260 | ATP2C1      | 2,75     | 1,56        |
| ENSG00000176225 | RTTN        | 2,74     | 2,41        |
| ENSG00000010810 | FYN         | 2,74     | 2,53        |
| ENSG00000119718 | EIF2B2      | 2,74     | 1,65        |
| ENSG00000122565 | CBX3        | 2,74     | 1,72        |
| ENSG00000141437 | SLC25A52    | 2,74     | 1,34        |

| ensembl gene    | gene symbol | Score(d) | Fold Change |
|-----------------|-------------|----------|-------------|
| ENSG00000104142 | VPS18       | 2,74     | 1,39        |
| ENSG00000214642 | DEFB113     | 2,74     | 1,42        |
| ENSG00000145912 | NHP2        | 2,73     | 1,74        |
| ENSG00000162607 | USP1        | 2,73     | 1,64        |
| ENSG00000088986 | DYNLL1      | 2,73     | 2,80        |
| ENSG00000197019 | SERTAD1     | 2,73     | 1,68        |
| ENSG00000132436 | FIGNL1      | 2,73     | 2,19        |
| ENSG00000127603 | MACF1       | 2,73     | 1,54        |
| ENSG00000062524 | LTK         | 2,72     | 1,91        |
| ENSG00000187612 | OR5W2       | 2,72     | 1,26        |
| ENSG00000156232 | WHAMM       | 2,72     | 1,85        |
| ENSG00000165164 | CFAP47      | 2,72     | 1,77        |
| ENSG00000134077 | THUMPD3     | 2,72     | 1,39        |
| ENSG00000112130 | RNF8        | 2,72     | 1,68        |
| ENSG00000163634 | THOC7       | 2,72     | 1,92        |
| ENSG00000171295 | ZNF440      | 2,72     | 1,42        |
| ENSG00000155438 | NIFK        | 2,72     | 1,75        |
| ENSG00000108651 | UTP6        | 2,72     | 1,60        |
| ENSG00000180745 | CLRN3       | 2,71     | 1,27        |
| ENSG00000197417 | SHPK        | 2,71     | 1,97        |
| ENSG00000187516 | HYPM        | 2,71     | 1,39        |
| ENSG00000172421 | EFCAB3      | 2,71     | 1,33        |
| ENSG00000083937 | CHMP2B      | 2,71     | 1,52        |
| ENSG00000121680 | PEX16       | 2,71     | 1,28        |
| ENSG00000100941 | PNN         | 2,71     | 1,71        |
| ENSG00000138068 | SULT6B1     | 2,71     | 1,48        |
| ENSG00000157870 | FAM213B     | 2,70     | 1,45        |
| ENSG00000130707 | ASS1        | 2,70     | 3,85        |
| ENSG00000131203 | IDO1        | 2,70     | 1,55        |
| ENSG00000122971 | ACADS       | 2,70     | 1,23        |
| ENSG00000206172 | HBA1        | 2,70     | 1,69        |
| ENSG00000183735 | TBK1        | 2,70     | 1,67        |
| ENSG00000163754 | GYG1        | 2,69     | 1,47        |
| ENSG00000102034 | ELF4        | 2,69     | 2,37        |
| ENSG00000278053 | DDX52       | 2,69     | 1,55        |
| ENSG00000173660 | UQCRH       | 2,69     | 2,05        |
| ENSG00000114942 | EEF1B2      | 2,69     | 1,87        |
| ENSG00000159579 | RSPRY1      | 2,69     | 1,58        |
| ENSG00000283526 | RP11-40A7.2 | 2,69     | 1,31        |
| ENSG00000105617 | LENG1       | 2,68     | 1,35        |
| ENSG00000197386 | HTT         | 2,68     | 1,58        |
| ENSG00000151012 | SLC7A11     | 2,68     | 4,53        |
| ENSG00000166441 | RPL27A      | 2,68     | 1,77        |
| ENSG00000151338 | MIPOL1      | 2,68     | 1,28        |
| ENSG00000197790 | OR52M1      | 2,68     | 1,33        |
| ENSG00000123159 | GIPC1       | 2,67     | 1,47        |
| ENSG00000073067 | CYP2W1      | 2,67     | 1,22        |
| ENSG00000170802 | FOXN2       | 2,67     | 1,61        |
| ENSG00000111087 | GLI1        | 2,67     | 1,28        |

| ensembl gene    | gene symbol | Score(d) | Fold Change |
|-----------------|-------------|----------|-------------|
| ENSG00000106459 | NRF1        | 2,67     | 1,64        |
| ENSG00000143878 | RHOB        | 2,66     | 2,33        |
| ENSG00000198898 | CAPZA2      | 2,66     | 1,61        |
| ENSG00000168297 | PXK         | 2,66     | 2,33        |
| ENSG00000132259 | CNGA4       | 2,66     | 1,31        |
| ENSG00000164647 | STEAP1      | 2,66     | 1,64        |
| ENSG00000145975 | FAM217A     | 2,66     | 1,55        |
| ENSG00000130772 | MED18       | 2,66     | 1,32        |
| ENSG00000164038 | SLC9B2      | 2,66     | 1,63        |
| ENSG00000140284 | SLC27A2     | 2,66     | 1,90        |
| ENSG00000023909 | GCLM        | 2,65     | 1,72        |
| ENSG00000114854 | TNNC1       | 2,65     | 1,43        |
| ENSG00000155744 | FAM126B     | 2,65     | 1,56        |
| ENSG00000003096 | KLHL13      | 2,65     | 1,54        |
| ENSG00000168488 | ATXN2L      | 2,65     | 1,47        |
| ENSG00000160948 | VPS28       | 2,65     | 1,47        |
| ENSG00000136710 | CCDC115     | 2,65     | 1,28        |
| ENSG00000173264 | GPR137      | 2,65     | 1,40        |
| ENSG00000076043 | REXO2       | 2,64     | 2,35        |
| ENSG00000148335 | NTMT1       | 2,64     | 1,43        |
| ENSG00000127334 | DYRK2       | 2,64     | 2,39        |
| ENSG00000021355 | SERPINB1    | 2,64     | 1,53        |
| ENSG00000160161 | CILP2       | 2,64     | 1,37        |
| ENSG00000129951 | PLPPR3      | 2,64     | 1,23        |
| ENSG00000186281 | GPAT2       | 2,64     | 2,00        |
| ENSG00000178952 | TUFM        | 2,64     | 1,77        |
| ENSG00000126698 | DNAJC8      | 2,64     | 1,43        |
| ENSG00000204520 | MICA        | 2,64     | 1,56        |
| ENSG00000033050 | ABCF2       | 2,64     | 1,43        |
| ENSG00000151923 | TIAL1       | 2,64     | 1,24        |
| ENSG00000154529 | CNTNAP3B    | 2,64     | 1,37        |
| ENSG00000171202 | TMEM126A    | 2,64     | 1,97        |
| ENSG00000157800 | SLC37A3     | 2,63     | 2,05        |
| ENSG00000101782 | RIOK3       | 2,63     | 1,64        |
| ENSG00000160445 | ZER1        | 2,63     | 1,37        |
| ENSG00000065883 | CDK13       | 2,63     | 1,36        |
| ENSG00000164128 | NPY1R       | 2,63     | 1,53        |
| ENSG00000185085 | INTS5       | 2,63     | 1,48        |
| ENSG00000147432 | CHRNA3      | 2,63     | 1,32        |
| ENSG00000060971 | ACAA1       | 2,63     | 1,53        |
| ENSG00000214367 | HAUS3       | 2,63     | 2,16        |
| ENSG00000249751 | ECSCR       | 2,63     | 1,32        |
| ENSG00000150456 | EEF1AKMT1   | 2,63     | 1,34        |
| ENSG00000204946 | ZNF783      | 2,63     | 1,53        |
| ENSG00000144802 | NFKBIZ      | 2,63     | 2,55        |
| ENSG00000163098 | BIRC8       | 2,62     | 1,48        |
| ENSG00000167461 | RAB8A       | 2,62     | 1,58        |
| ENSG00000138028 | CGREF1      | 2,62     | 1,36        |
| ENSG00000169155 | ZBTB43      | 2,62     | 1,64        |

| ensembl gene    | gene symbol | Score(d) | Fold Change |
|-----------------|-------------|----------|-------------|
| ENSG00000105290 | APLP1       | 2,62     | 1,23        |
| ENSG00000132286 | TIMM10B     | 2,62     | 1,47        |
| ENSG00000222047 | C10orf55    | 2,62     | 1,37        |
| ENSG00000146757 | ZNF92       | 2,62     | 1,76        |
| ENSG00000145337 | PYURF       | 2,62     | 1,51        |
| ENSG00000033030 | ZCCHC8      | 2,62     | 1,49        |
| ENSG00000204887 | KRTAP1-4    | 2,62     | 1,54        |
| ENSG00000127125 | PPCS        | 2,62     | 1,72        |
| ENSG00000116473 | RAP1A       | 2,62     | 1,64        |
| ENSG00000116171 | SCP2        | 2,61     | 1,75        |
| ENSG00000074695 | LMAN1       | 2,61     | 1,48        |
| ENSG00000183569 | SERHL2      | 2,61     | 1,89        |
| ENSG00000164758 | MED30       | 2,61     | 1,57        |
| ENSG00000261857 | MIA         | 2,61     | 2,93        |
| ENSG00000222014 | RAB6C       | 2,61     | 1,47        |
| ENSG00000134982 | APC         | 2,61     | 1,58        |
| ENSG00000185730 | ZNF696      | 2,61     | 1,33        |
| ENSG00000152223 | EPG5        | 2,61     | 1,31        |
| ENSG00000136717 | BIN1        | 2,61     | 1,75        |
| ENSG00000179055 | OR13D1      | 2,60     | 1,40        |
| ENSG00000183048 | SLC25A10    | 2,60     | 1,30        |
| ENSG00000180573 | HIST1H2AC   | 2,60     | 2,31        |
| ENSG00000067900 | ROCK1       | 2,60     | 1,41        |
| ENSG00000160932 | LY6E        | 2,60     | 3,05        |
| ENSG00000074211 | PPP2R2C     | 2,60     | 1,35        |
| ENSG00000081307 | UBA5        | 2,60     | 1,34        |
| ENSG00000160993 | ALKBH4      | 2,60     | 1,34        |
| ENSG00000031081 | ARHGAP31    | 2,59     | 1,89        |
| ENSG00000133020 | MYH8        | 2,59     | 1,39        |
| ENSG00000172538 | FAM170B     | 2,59     | 1,34        |
| ENSG00000138802 | SEC24B      | 2,59     | 1,36        |
| ENSG00000112249 | ASCC3       | 2,59     | 1,67        |
| ENSG00000196420 | S100A5      | 2,59     | 1,27        |
| ENSG00000115758 | ODC1        | 2,59     | 1,41        |
| ENSG00000109832 | DDX25       | 2,59     | 1,31        |
| ENSG00000170369 | CST2        | 2,59     | 1,34        |
| ENSG00000188672 | RHCE        | 2,58     | 1,53        |
| ENSG00000167384 | ZNF180      | 2,58     | 1,67        |
| ENSG00000140320 | BAHD1       | 2,58     | 1,53        |
| ENSG00000105619 | TFPT        | 2,58     | 1,48        |
| ENSG00000239900 | ADSL        | 2,58     | 1,75        |
| ENSG00000162877 | PM20D1      | 2,58     | 2,13        |
| ENSG00000138685 | FGF2        | 2,58     | 3,77        |
| ENSG00000055332 | EIF2AK2     | 2,58     | 1,55        |
| ENSG00000015479 | MATR3       | 2,58     | 1,56        |
| ENSG00000141161 | UNC45B      | 2,58     | 1,17        |
| ENSG00000150787 | PTS         | 2,58     | 1,42        |
| ENSG00000135976 | ANKRD36     | 2,58     | 1,96        |
| ENSG00000221823 | PPP3R1      | 2,58     | 1,41        |

| ensembl gene    | gene symbol | Score(d) | Fold Change |
|-----------------|-------------|----------|-------------|
| ENSG00000205856 | C22orf42    | 2,57     | 1,30        |
| ENSG00000178473 | UCN3        | 2,57     | 1,37        |
| ENSG00000088247 | KHSRP       | 2,57     | 1,35        |
| ENSG00000135655 | USP15       | 2,57     | 1,41        |
| ENSG00000155368 | DBI         | 2,57     | 1,67        |
| ENSG00000130598 | TNNI2       | 2,57     | 1,34        |
| ENSG00000114520 | SNX4        | 2,57     | 1,80        |
| ENSG00000147872 | PLIN2       | 2,56     | 1,38        |
| ENSG00000136960 | ENPP2       | 2,56     | 4,23        |
| ENSG00000075223 | SEMA3C      | 2,56     | 1,64        |
| ENSG00000100028 | SNRPD3      | 2,56     | 1,72        |
| ENSG00000130720 | FIBCD1      | 2,56     | 1,46        |
| ENSG00000090266 | NDUFB2      | 2,56     | 1,43        |
| ENSG00000130755 | GMFG        | 2,56     | 1,75        |
| ENSG00000131437 | KIF3A       | 2,56     | 1,85        |
| ENSG00000143971 | ETAA1       | 2,56     | 1,66        |
| ENSG00000093000 | NUP50       | 2,56     | 1,66        |
| ENSG00000111445 | RFC5        | 2,56     | 1,54        |
| ENSG00000113739 | STC2        | 2,56     | 2,57        |
| ENSG00000099785 | MARCHF2     | 2,55     | 1,36        |
| ENSG00000166780 | C16orf45    | 2,55     | 1,46        |
| ENSG00000139350 | NEDD1       | 2,55     | 1,48        |
| ENSG00000137831 | UACA        | 2,55     | 1,64        |
| ENSG00000176903 | PNMA1       | 2,55     | 1,91        |
| ENSG00000123737 | EXOSC9      | 2,55     | 1,33        |
| ENSG00000130764 | LRRC47      | 2,55     | 1,43        |
| ENSG00000197061 | HIST1H4C    | 2,55     | 1,62        |
| ENSG00000111450 | STX2        | 2,55     | 1,88        |
| ENSG00000239810 | PRAMEF11    | 2,54     | 1,39        |
| ENSG00000096384 | HSP90AB1    | 2,54     | 1,51        |
| ENSG00000107807 | TLX1        | 2,54     | 1,53        |
| ENSG00000049541 | RFC2        | 2,54     | 1,57        |
| ENSG00000132467 | UTP3        | 2,54     | 1,64        |
| ENSG00000033867 | SLC4A7      | 2,54     | 1,73        |
| ENSG00000162654 | GBP4        | 2,54     | 4,46        |
| ENSG00000078808 | SDF4        | 2,54     | 1,40        |
| ENSG00000174137 | FAM53A      | 2,54     | 1,27        |
| ENSG00000128040 | SPINK2      | 2,54     | 1,37        |
| ENSG00000147869 | CER1        | 2,54     | 1,26        |
| ENSG00000166869 | CHP2        | 2,54     | 1,28        |
| ENSG00000048162 | NOP16       | 2,54     | 1,98        |
| ENSG00000170653 | ATF7        | 2,53     | 1,91        |
| ENSG00000196376 | SLC35F1     | 2,53     | 3,00        |
| ENSG00000134962 | KLB         | 2,53     | 1,27        |
| ENSG00000006659 | LGALS14     | 2,53     | 7,29        |
| ENSG00000082515 | MRPL22      | 2,53     | 1,61        |
| ENSG00000070669 | ASNS        | 2,53     | 2,14        |
| ENSG00000113013 | HSPA9       | 2,53     | 1,46        |
| ENSG00000186335 | SLC36A2     | 2,53     | 1,38        |

| ensembl gene    | gene symbol | Score(d) | Fold Change |
|-----------------|-------------|----------|-------------|
| ENSG00000176853 | FAM91A1     | 2,53     | 1,35        |
| ENSG00000187608 | ISG15       | 2,53     | 2,14        |
| ENSG00000127774 | EMC6        | 2,52     | 1,38        |
| ENSG00000139194 | RBP5        | 2,52     | 1,27        |
| ENSG00000121064 | SCPEP1      | 2,52     | 2,08        |
| ENSG00000158786 | PLA2G2F     | 2,52     | 1,29        |
| ENSG00000206549 | PRSS50      | 2,52     | 1,19        |
| ENSG00000221878 | PSG7        | 2,52     | 1,31        |
| ENSG00000107282 | APBA1       | 2,52     | 1,63        |
| ENSG00000101132 | PFDN4       | 2,52     | 1,45        |
| ENSG00000013441 | CLK1        | 2,52     | 1,58        |
| ENSG00000112208 | BAG2        | 2,51     | 1,69        |
| ENSG00000119787 | ATL2        | 2,51     | 1,59        |
| ENSG00000165688 | PMPCA       | 2,51     | 1,60        |
| ENSG00000169967 | MAP3K2      | 2,51     | 1,55        |
| ENSG00000148835 | TAF5        | 2,51     | 1,44        |
| ENSG00000167210 | LOXHD1      | 2,51     | 1,20        |
| ENSG00000163069 | SGCB        | 2,51     | 3,64        |
| ENSG00000082438 | COBLL1      | 2,51     | 1,85        |
| ENSG00000127580 | WDR24       | 2,51     | 1,26        |
| ENSG00000085721 | RRN3        | 2,50     | 1,66        |
| ENSG00000215906 | LACTBL1     | 2,50     | 1,20        |
| ENSG00000205220 | PSMB10      | 2,50     | 1,56        |
| ENSG00000183644 | C11orf88    | 2,50     | 1,28        |
| ENSG00000165732 | DDX21       | 2,50     | 1,72        |
| ENSG00000117620 | SLC35A3     | 2,50     | 1,38        |
| ENSG00000008277 | ADAM22      | 2,50     | 2,28        |
| ENSG00000242110 | AMACR       | 2,49     | 1,45        |
| ENSG00000104818 | CGB2        | 2,49     | 1,33        |
| ENSG00000138750 | NUP54       | 2,49     | 1,34        |
| ENSG00000174886 | NDUFA11     | 2,49     | 1,43        |
| ENSG00000127530 | OR7C1       | 2,49     | 1,36        |
| ENSG00000107819 | SFXN3       | 2,49     | 1,48        |
| ENSG00000135842 | FAM129A     | 2,49     | 2,99        |
| ENSG00000119820 | YIPF4       | 2,49     | 1,63        |
| ENSG00000181191 | PJA1        | 2,49     | 1,86        |
| ENSG00000069345 | DNAJA2      | 2,49     | 1,58        |
| ENSG00000109787 | KLF3        | 2,49     | 1,46        |
| ENSG00000165259 | HDX         | 2,49     | 1,57        |
| ENSG00000163071 | SPATA18     | 2,49     | 1,41        |
| ENSG00000085449 | WDFY1       | 2,49     | 1,73        |
| ENSG00000162687 | KCNT2       | 2,49     | 2,80        |
| ENSG00000182957 | SPATA13     | 2,49     | 3,06        |
| ENSG00000085741 | WNT11       | 2,48     | 1,46        |
| ENSG00000163510 | CWC22       | 2,48     | 1,47        |
| ENSG00000168259 | DNAJC7      | 2,48     | 1,37        |
| ENSG00000137574 | TGS1        | 2,48     | 1,46        |
| ENSG00000107771 | CCSER2      | 2,48     | 1,47        |
| ENSG00000124659 | TBCC        | 2,48     | 1,44        |



| ensembl gene    | gene symbol | Score(d) | Fold Change |
|-----------------|-------------|----------|-------------|
| ENSG00000197930 | ERO1A       | 2,48     | 1,38        |
| ENSG00000171954 | CYP4F22     | 2,48     | 1,18        |
| ENSG00000177854 | TMEM187     | 2,48     | 1,75        |
| ENSG00000086288 | NME8        | 2,48     | 1,65        |
| ENSG00000116783 | TNNI3K      | 2,47     | 1,84        |
| ENSG00000102858 | MGRN1       | 2,47     | 1,43        |
| ENSG00000176624 | MEX3C       | 2,47     | 1,34        |
| ENSG00000181499 | OR6T1       | 2,47     | 1,36        |
| ENSG00000144635 | DYNC1LI1    | 2,47     | 1,46        |
| ENSG00000170486 | KRT72       | 2,47     | 1,55        |
| ENSG00000171262 | FAM98B      | 2,46     | 1,66        |
| ENSG00000072786 | STK10       | 2,46     | 1,55        |
| ENSG00000026025 | VIM         | 2,46     | 1,70        |
| ENSG00000141391 | PRELID3A    | 2,46     | 1,34        |
| ENSG00000165264 | NDUFB6      | 2,46     | 1,64        |
| ENSG00000181523 | SGSH        | 2,46     | 1,49        |
| ENSG00000169297 | NROB1       | 2,46     | 1,30        |
| ENSG00000159202 | UBE2Z       | 2,46     | 1,60        |
| ENSG00000009954 | BAZ1B       | 2,46     | 1,40        |
| ENSG00000197780 | TAF13       | 2,45     | 1,59        |
| ENSG00000171492 | LRRC8D      | 2,45     | 1,58        |
| ENSG00000128805 | ARHGAP22    | 2,45     | 1,87        |
| ENSG00000103507 | BCKDK       | 2,45     | 1,69        |
| ENSG00000043591 | ADRB1       | 2,45     | 1,34        |
| ENSG00000120215 | MLANA       | 2,45     | 1,21        |
| ENSG00000213213 | CCDC183     | 2,45     | 1,66        |
| ENSG00000056558 | TRAF1       | 2,45     | 1,48        |
| ENSG00000196151 | WDSUB1      | 2,45     | 1,58        |
| ENSG00000002919 | SNX11       | 2,45     | 1,46        |
| ENSG00000067829 | IDH3G       | 2,45     | 1,40        |
| ENSG00000111046 | MYF6        | 2,45     | 2,31        |
| ENSG00000178105 | DDX10       | 2,45     | 2,02        |
| ENSG00000237515 | SHISA9      | 2,45     | 1,30        |
| ENSG00000146232 | NFKBIE      | 2,44     | 2,02        |
| ENSG00000244165 | P2RY11      | 2,44     | 1,67        |
| ENSG00000214860 | EVPLL       | 2,44     | 1,54        |
| ENSG00000149488 | TMC2        | 2,44     | 1,29        |
| ENSG00000067248 | DHX29       | 2,44     | 1,38        |
| ENSG00000139620 | KANSL2      | 2,44     | 1,29        |
| ENSG00000135972 | MRPS9       | 2,44     | 1,50        |
| ENSG00000105982 | RNF32       | 2,44     | 1,71        |
| ENSG00000181218 | HIST3H2A    | 2,44     | 2,22        |
| ENSG00000204308 | RNF5        | 2,44     | 1,51        |
| ENSG00000167112 | TRUB2       | 2,44     | 1,54        |
| ENSG00000258713 | C20orf141   | 2,43     | 1,34        |
| ENSG00000118707 | TGIF2       | 2,43     | 1,60        |
| ENSG00000144736 | SHQ1        | 2,43     | 1,77        |
| ENSG00000108588 | CCDC47      | 2,43     | 1,45        |
| ENSG00000132846 | ZBED3       | 2,43     | 1,57        |

| ensembl gene    | gene symbol  | Score(d) | Fold Change |
|-----------------|--------------|----------|-------------|
| ENSG00000142279 | WTIP         | 2,43     | 1,23        |
| ENSG00000146872 | TLK2         | 2,43     | 1,34        |
| ENSG00000092148 | HECTD1       | 2,43     | 1,25        |
| ENSG00000142230 | SAE1         | 2,43     | 1,44        |
| ENSG00000075188 | NUP37        | 2,43     | 1,64        |
| ENSG00000173464 | RNASE11      | 2,43     | 1,96        |
| ENSG00000165916 | PSMC3        | 2,43     | 1,54        |
| ENSG00000108443 | RPS6KB1      | 2,43     | 1,49        |
| ENSG00000108582 | CPD          | 2,43     | 2,00        |
| ENSG00000205730 | ITPRIPL2     | 2,43     | 1,42        |
| ENSG00000163946 | FAM208A      | 2,43     | 1,51        |
| ENSG00000170128 | GPR25        | 2,43     | 1,28        |
| ENSG00000069424 | KCNAB2       | 2,43     | 1,41        |
| ENSG00000146755 | TRIM50       | 2,42     | 1,39        |
| ENSG00000169594 | BNC1         | 2,42     | 1,19        |
| ENSG00000067064 | IDI1         | 2,42     | 1,46        |
| ENSG00000185883 | ATP6V0C      | 2,42     | 1,26        |
| ENSG00000236279 | CLEC2L       | 2,42     | 1,44        |
| ENSG00000283697 | RP5-937E21.8 | 2,42     | 1,32        |
| ENSG00000181215 | C4orf50      | 2,42     | 1,20        |
| ENSG00000163749 | CCDC158      | 2,41     | 1,82        |
| ENSG00000213973 | ZNF99        | 2,41     | 1,29        |
| ENSG00000175324 | LSM1         | 2,41     | 1,43        |
| ENSG00000124783 | SSR1         | 2,41     | 1,34        |
| ENSG00000188761 | BCL2L15      | 2,41     | 1,62        |
| ENSG00000197603 | C5orf42      | 2,41     | 1,57        |
| ENSG00000120725 | SIL1         | 2,41     | 1,59        |
| ENSG00000171100 | MTM1         | 2,41     | 1,47        |
| ENSG00000090013 | BLVRB        | 2,41     | 1,89        |
| ENSG00000183798 | EMILIN3      | 2,41     | 1,24        |
| ENSG00000158315 | RHBDL2       | 2,41     | 1,28        |
| ENSG00000006042 | TMEM98       | 2,41     | 1,43        |
| ENSG00000130045 | NXNL2        | 2,41     | 1,42        |
| ENSG00000178338 | ZNF354B      | 2,40     | 1,35        |
| ENSG00000205277 | MUC12        | 2,40     | 1,25        |
| ENSG00000240857 | RDH14        | 2,40     | 1,33        |
| ENSG00000186141 | POLR3C       | 2,40     | 1,58        |
| ENSG00000113318 | MSH3         | 2,40     | 1,32        |
| ENSG00000196368 | NUDT11       | 2,40     | 1,63        |
| ENSG00000212710 | CTAGE1       | 2,40     | 1,37        |
| ENSG00000180988 | OR52N2       | 2,40     | 1,39        |
| ENSG00000126247 | CAPNS1       | 2,40     | 1,56        |
| ENSG00000118620 | ZNF430       | 2,40     | 2,12        |
| ENSG00000160410 | SHKBP1       | 2,39     | 1,35        |
| ENSG00000171824 | EXOSC10      | 2,39     | 1,27        |
| ENSG00000085433 | WDR47        | 2,39     | 1,70        |
| ENSG00000100749 | VRK1         | 2,39     | 1,94        |
| ENSG00000166743 | ACSM1        | 2,39     | 1,43        |
| ENSG00000166557 | TMED3        | 2,39     | 1,69        |

| ensembl gene    | gene symbol | Score(d) | Fold Change |
|-----------------|-------------|----------|-------------|
| ENSG00000155868 | MED7        | 2,39     | 1,31        |
| ENSG00000140471 | LINS1       | 2,39     | 1,48        |
| ENSG00000100083 | GGA1        | 2,39     | 1,40        |
| ENSG00000174963 | ZIC4        | 2,39     | 1,24        |
| ENSG00000166788 | SAAL1       | 2,38     | 1,46        |
| ENSG00000006062 | MAP3K14     | 2,38     | 1,76        |
| ENSG00000119185 | ITGB1BP1    | 2,38     | 1,60        |
| ENSG00000129675 | ARHGEF6     | 2,38     | 2,10        |
| ENSG00000213160 | KLHL23      | 2,38     | 1,96        |
| ENSG00000149050 | ZNF214      | 2,38     | 1,27        |
| ENSG00000175550 | DRAP1       | 2,38     | 1,79        |
| ENSG00000197410 | DCHS2       | 2,38     | 1,27        |
| ENSG00000029725 | RABEP1      | 2,38     | 1,63        |
| ENSG00000099995 | SF3A1       | 2,38     | 1,44        |
| ENSG00000154451 | GBP5        | 2,38     | 2,72        |
| ENSG00000113407 | TARS        | 2,38     | 1,69        |
| ENSG00000214842 | RAD51AP2    | 2,38     | 1,14        |
| ENSG00000183549 | ACSM5       | 2,38     | 1,46        |
| ENSG00000129219 | PLD2        | 2,38     | 1,72        |
| ENSG00000131871 | VIMP        | 2,38     | 1,51        |
| ENSG00000105085 | MED26       | 2,38     | 1,67        |
| ENSG00000174748 | RPL15       | 2,37     | 1,48        |
| ENSG00000082516 | GEMIN5      | 2,37     | 1,70        |
| ENSG00000174227 | PIGG        | 2,37     | 1,72        |
| ENSG00000164284 | GRPEL2      | 2,37     | 1,66        |
| ENSG00000086289 | EPDR1       | 2,37     | 2,01        |
| ENSG00000113580 | NR3C1       | 2,37     | 1,54        |
| ENSG00000015171 | ZMYND11     | 2,37     | 1,34        |
| ENSG00000138315 | OIT3        | 2,37     | 1,30        |
| ENSG00000145113 | MUC4        | 2,37     | 1,60        |
| ENSG00000196365 | LONP1       | 2,37     | 1,67        |
| ENSG00000133641 | C12orf29    | 2,37     | 1,40        |
| ENSG00000125841 | NRSN2       | 2,36     | 1,59        |
| ENSG00000178913 | TAF7        | 2,36     | 1,48        |
| ENSG00000123349 | PFDN5       | 2,36     | 1,44        |
| ENSG00000171503 | ETFDH       | 2,36     | 1,56        |
| ENSG00000176406 | RIMS2       | 2,36     | 3,40        |
| ENSG00000126895 | AVPR2       | 2,36     | 1,20        |
| ENSG00000111877 | MCM9        | 2,36     | 1,35        |
| ENSG00000241241 | KRTAP4-16   | 2,36     | 1,54        |
| ENSG00000138796 | HADH        | 2,36     | 2,28        |
| ENSG00000104549 | SQLE        | 2,36     | 1,63        |
| ENSG00000121905 | HPCA        | 2,36     | 1,47        |
| ENSG00000178226 | PRSS36      | 2,36     | 1,53        |
| ENSG00000186575 | NF2         | 2,36     | 1,65        |
| ENSG00000120709 | FAM53C      | 2,36     | 1,43        |
| ENSG00000100079 | LGALS2      | 2,36     | 1,40        |
| ENSG00000241128 | OR14A2      | 2,36     | 1,46        |
| ENSG00000158710 | TAGLN2      | 2,36     | 1,83        |

| ensembl gene    | gene symbol | Score(d) | Fold Change |
|-----------------|-------------|----------|-------------|
| ENSG00000165449 | SLC16A9     | 2,35     | 1,39        |
| ENSG00000101200 | AVP         | 2,35     | 1,29        |
| ENSG00000062650 | WAPL        | 2,35     | 1,41        |
| ENSG0000006634  | DBF4        | 2,35     | 1,82        |
| ENSG00000149150 | SLC43A1     | 2,35     | 2,03        |
| ENSG00000186329 | TMEM212     | 2,35     | 1,46        |
| ENSG00000187581 | COX8C       | 2,35     | 1,20        |
| ENSG00000166582 | CENPV       | 2,35     | 1,70        |
| ENSG00000166411 | IDH3A       | 2,35     | 1,35        |
| ENSG00000173769 | TOPAZ1      | 2,35     | 1,16        |
| ENSG00000117682 | DHDDS       | 2,35     | 1,59        |
| ENSG00000124216 | SNAI1       | 2,35     | 1,43        |
| ENSG00000137713 | PPP2R1B     | 2,34     | 1,53        |
| ENSG00000196890 | HIST3H2BB   | 2,34     | 1,68        |
| ENSG00000109805 | NCAPG       | 2,34     | 2,12        |
| ENSG00000173335 | CST9        | 2,34     | 1,21        |
| ENSG00000159884 | CCDC107     | 2,34     | 1,27        |
| ENSG00000179262 | RAD23A      | 2,34     | 1,34        |
| ENSG00000077454 | LRCH4       | 2,34     | 1,52        |
| ENSG00000204315 | FKBPL       | 2,34     | 1,25        |
| ENSG00000156269 | NAA11       | 2,34     | 1,69        |
| ENSG00000168615 | ADAM9       | 2,34     | 2,46        |
| ENSG00000069764 | PLA2G10     | 2,33     | 2,10        |
| ENSG00000255713 | OR4D2       | 2,33     | 1,55        |
| ENSG00000078668 | VDAC3       | 2,33     | 1,78        |
| ENSG0000006652  | IFRD1       | 2,33     | 1,68        |
| ENSG00000168143 | FAM83B      | 2,33     | 1,23        |
| ENSG00000143977 | SNRPG       | 2,33     | 1,52        |
| ENSG00000227500 | SCAMP4      | 2,33     | 1,48        |
| ENSG00000164045 | CDC25A      | 2,33     | 1,37        |
| ENSG00000152463 | OLAH        | 2,33     | 3,57        |
| ENSG00000103067 | ESRP2       | 2,33     | 1,52        |
| ENSG00000108479 | GALK1       | 2,32     | 1,21        |
| ENSG00000108854 | SMURF2      | 2,32     | 1,46        |
| ENSG00000133055 | MYBPH       | 2,32     | 1,19        |
| ENSG00000179331 | RAB39A      | 2,32     | 1,95        |
| ENSG00000172031 | EPHX4       | 2,32     | 1,43        |
| ENSG00000095917 | TPSD1       | 2,32     | 1,38        |
| ENSG00000132530 | XAF1        | 2,32     | 2,17        |
| ENSG00000103174 | NAGPA       | 2,32     | 1,68        |
| ENSG00000169856 | ONECUT1     | 2,31     | 1,28        |
| ENSG00000102007 | PLP2        | 2,31     | 1,40        |
| ENSG00000160087 | UBE2J2      | 2,31     | 1,51        |
| ENSG00000177733 | HNRNPA0     | 2,31     | 1,38        |
| ENSG00000102683 | SGCG        | 2,31     | 1,32        |
| ENSG00000184305 | CCSER1      | -2,14    | 0,40        |
| ENSG00000165457 | FOLR2       | -2,14    | 0,65        |
| ENSG00000126773 | PCNX4       | -2,14    | 0,59        |
| ENSG00000004975 | DVL2        | -2,14    | 0,75        |

| ensembl gene    | gene symbol | Score(d) | Fold Change |
|-----------------|-------------|----------|-------------|
| ENSG00000118096 | IFT46       | -2,14    | 0,60        |
| ENSG00000140678 | ITGAX       | -2,14    | 0,61        |
| ENSG00000104643 | MTMR9       | -2,15    | 0,69        |
| ENSG00000115884 | SDC1        | -2,15    | 0,66        |
| ENSG00000170549 | IRX1        | -2,15    | 0,77        |
| ENSG00000196557 | CACNA1H     | -2,15    | 0,70        |
| ENSG00000105479 | CCDC114     | -2,15    | 0,75        |
| ENSG00000197584 | KCNMB2      | -2,15    | 0,36        |
| ENSG00000160055 | TMEM234     | -2,15    | 0,76        |
| ENSG00000135439 | AGAP2       | -2,15    | 0,62        |
| ENSG00000100429 | HDAC10      | -2,15    | 0,56        |
| ENSG00000149932 | TMEM219     | -2,15    | 0,73        |
| ENSG00000092009 | CMA1        | -2,15    | 0,86        |
| ENSG00000256436 | TAS2R31     | -2,15    | 0,55        |
| ENSG00000071909 | MYO3B       | -2,15    | 0,38        |
| ENSG00000111536 | IL26        | -2,15    | 0,63        |
| ENSG00000196505 | GDAP2       | -2,15    | 0,71        |
| ENSG00000116690 | PRG4        | -2,15    | 0,72        |
| ENSG00000179902 | C1orf194    | -2,15    | 0,83        |
| ENSG00000170989 | S1PR1       | -2,15    | 0,41        |
| ENSG00000181751 | C5orf30     | -2,16    | 0,64        |
| ENSG00000198894 | CIPC        | -2,16    | 0,73        |
| ENSG00000112033 | PPARD       | -2,16    | 0,74        |
| ENSG00000103769 | RAB11A      | -2,16    | 0,73        |
| ENSG00000184992 | BRI3BP      | -2,16    | 0,65        |
| ENSG00000143353 | LYPLAL1     | -2,16    | 0,62        |
| ENSG00000140400 | MAN2C1      | -2,16    | 0,68        |
| ENSG00000105829 | BET1        | -2,16    | 0,50        |
| ENSG00000183091 | NEB         | -2,16    | 0,25        |
| ENSG00000140398 | NEIL1       | -2,16    | 0,51        |
| ENSG00000075420 | FNDC3B      | -2,16    | 0,66        |
| ENSG00000215343 | ZNF705D     | -2,16    | 0,80        |
| ENSG00000152767 | FARP1       | -2,16    | 0,46        |
| ENSG00000126456 | IRF3        | -2,16    | 0,69        |
| ENSG00000153982 | GDPD1       | -2,16    | 0,45        |
| ENSG00000132688 | NES         | -2,16    | 0,43        |
| ENSG00000155506 | LARP1       | -2,17    | 0,77        |
| ENSG00000078269 | SYNJ2       | -2,17    | 0,75        |
| ENSG00000196372 | ASB13       | -2,17    | 0,70        |
| ENSG00000197879 | MYO1C       | -2,17    | 0,65        |
| ENSG00000132424 | PNISR       | -2,17    | 0,77        |
| ENSG00000135097 | MSI1        | -2,17    | 0,81        |
| ENSG00000168772 | CXXC4       | -2,17    | 0,40        |
| ENSG00000168447 | SCNN1B      | -2,17    | 0,42        |
| ENSG00000105204 | DYRK1B      | -2,17    | 0,71        |
| ENSG00000204186 | ZDBF2       | -2,17    | 0,62        |
| ENSG00000131788 | PIAS3       | -2,17    | 0,74        |
| ENSG00000115652 | UXS1        | -2,17    | 0,66        |
| ENSG00000257335 | MGAM        | -2,17    | 0,48        |

| ensembl gene    | gene symbol | Score(d) | Fold Change |
|-----------------|-------------|----------|-------------|
| ENSG00000001629 | ANKIB1      | -2,17    | 0,67        |
| ENSG00000178852 | EFCAB13     | -2,17    | 0,63        |
| ENSG00000197428 | OR51D1      | -2,17    | 0,72        |
| ENSG00000150967 | ABCB9       | -2,17    | 0,60        |
| ENSG00000082482 | KCNK2       | -2,17    | 0,81        |
| ENSG00000100292 | HMOX1       | -2,18    | 0,51        |
| ENSG00000256294 | ZNF225      | -2,18    | 0,68        |
| ENSG00000184384 | MAML2       | -2,18    | 0,57        |
| ENSG00000149243 | KLHL35      | -2,18    | 0,68        |
| ENSG00000148655 | C10orf11    | -2,18    | 0,48        |
| ENSG00000100246 | DNAL4       | -2,18    | 0,65        |
| ENSG00000156738 | MS4A1       | -2,18    | 0,15        |
| ENSG00000112624 | GLTSCR1L    | -2,18    | 0,69        |
| ENSG00000170734 | POLH        | -2,18    | 0,48        |
| ENSG00000170323 | FABP4       | -2,18    | 0,44        |
| ENSG00000164086 | DUSP7       | -2,18    | 0,68        |
| ENSG00000100330 | MTMR3       | -2,18    | 0,64        |
| ENSG00000151117 | TMEM86A     | -2,18    | 0,68        |
| ENSG00000163832 | ELP6        | -2,18    | 0,70        |
| ENSG00000174989 | FBXW8       | -2,19    | 0,59        |
| ENSG00000162819 | BROX        | -2,19    | 0,76        |
| ENSG00000159189 | C1QC        | -2,19    | 0,48        |
| ENSG00000169683 | LRRC45      | -2,19    | 0,71        |
| ENSG00000152207 | CYSLTR2     | -2,19    | 0,42        |
| ENSG00000136929 | HEMGN       | -2,19    | 0,68        |
| ENSG00000105997 | HOXA3       | -2,19    | 0,78        |
| ENSG00000168813 | ZNF507      | -2,19    | 0,66        |
| ENSG00000177479 | ARIH2       | -2,19    | 0,78        |
| ENSG00000046651 | OFD1        | -2,19    | 0,72        |
| ENSG00000165959 | CLMN        | -2,19    | 0,61        |
| ENSG00000141905 | NFIC        | -2,19    | 0,77        |
| ENSG00000108091 | CCDC6       | -2,19    | 0,48        |
| ENSG00000215612 | HMX1        | -2,19    | 0,83        |
| ENSG00000103150 | MLYCD       | -2,19    | 0,71        |
| ENSG00000197165 | SULT1A2     | -2,19    | 0,75        |
| ENSG00000143776 | CDC42BPA    | -2,19    | 0,70        |
| ENSG00000135093 | USP30       | -2,19    | 0,70        |
| ENSG00000263465 | SRSF8       | -2,20    | 0,68        |
| ENSG00000132470 | ITGB4       | -2,20    | 0,76        |
| ENSG00000139624 | CERS5       | -2,20    | 0,71        |
| ENSG00000158717 | RNF166      | -2,20    | 0,64        |
| ENSG00000171044 | XKR6        | -2,20    | 0,41        |
| ENSG00000145414 | NAF1        | -2,20    | 0,72        |
| ENSG00000152213 | ARL11       | -2,20    | 0,66        |
| ENSG00000169223 | LMAN2       | -2,20    | 0,67        |
| ENSG00000123411 | IKZF4       | -2,20    | 0,65        |
| ENSG00000183337 | BCOR        | -2,20    | 0,54        |
| ENSG00000136371 | MTHFS       | -2,20    | 0,69        |
| ENSG00000116157 | GPX7        | -2,20    | 0,67        |

| ensembl gene    | gene symbol | Score(d) | Fold Change |
|-----------------|-------------|----------|-------------|
| ENSG00000064961 | HMG20B      | -2,20    | 0,71        |
| ENSG00000171649 | ZIK1        | -2,20    | 0,57        |
| ENSG00000166987 | MBD6        | -2,20    | 0,67        |
| ENSG00000268089 | GABRQ       | -2,21    | 0,84        |
| ENSG00000169905 | TOR1AIP2    | -2,21    | 0,75        |
| ENSG00000197561 | ELANE       | -2,21    | 0,52        |
| ENSG00000154478 | GPR26       | -2,21    | 0,84        |
| ENSG00000166167 | BTRC        | -2,21    | 0,68        |
| ENSG00000145979 | TBC1D7      | -2,21    | 0,62        |
| ENSG00000101040 | ZMYND8      | -2,21    | 0,59        |
| ENSG00000178741 | COX5A       | -2,21    | 0,68        |
| ENSG00000251369 | ZNF550      | -2,21    | 0,64        |
| ENSG00000178764 | ZHX2        | -2,21    | 0,72        |
| ENSG00000186399 | GOLGA8R     | -2,21    | 0,57        |
| ENSG00000182551 | ADI1        | -2,21    | 0,75        |
| ENSG00000139651 | ZNF740      | -2,21    | 0,67        |
| ENSG00000033170 | FUT8        | -2,21    | 0,29        |
| ENSG00000169047 | IRS1        | -2,21    | 0,45        |
| ENSG00000198832 | SELM        | -2,22    | 0,55        |
| ENSG00000154589 | LY96        | -2,22    | 0,44        |
| ENSG00000100023 | PPIL2       | -2,22    | 0,73        |
| ENSG00000145779 | TNFAIP8     | -2,22    | 0,57        |
| ENSG00000119801 | YPEL5       | -2,22    | 0,73        |
| ENSG00000147905 | ZCCHC7      | -2,22    | 0,64        |
| ENSG00000166435 | XRR1        | -2,22    | 0,48        |
| ENSG00000275074 | NUDT18      | -2,22    | 0,77        |
| ENSG00000136895 | GARNL3      | -2,22    | 0,64        |
| ENSG00000113441 | LNPEP       | -2,22    | 0,54        |
| ENSG00000148180 | GSN         | -2,23    | 0,59        |
| ENSG00000189362 | NEMP2       | -2,23    | 0,64        |
| ENSG00000130382 | MLLT1       | -2,23    | 0,66        |
| ENSG00000074370 | ATP2A3      | -2,23    | 0,60        |
| ENSG00000186889 | TMEM17      | -2,23    | 0,60        |
| ENSG00000072736 | NFATC3      | -2,23    | 0,65        |
| ENSG00000081791 | KIAA0141    | -2,23    | 0,69        |
| ENSG00000132716 | DCAF8       | -2,23    | 0,65        |
| ENSG00000162980 | ARL5A       | -2,23    | 0,55        |
| ENSG00000172780 | RAB43       | -2,23    | 0,58        |
| ENSG00000112787 | FBRSL1      | -2,23    | 0,79        |
| ENSG00000171840 | NINJ2       | -2,23    | 0,68        |
| ENSG00000196576 | PLXNB2      | -2,23    | 0,57        |
| ENSG00000168286 | THAP11      | -2,23    | 0,76        |
| ENSG00000165282 | PIGO        | -2,23    | 0,64        |
| ENSG00000170345 | FOS         | -2,24    | 0,46        |
| ENSG00000156398 | SFXN2       | -2,24    | 0,69        |
| ENSG00000145982 | FARS2       | -2,24    | 0,63        |
| ENSG00000059804 | SLC2A3      | -2,24    | 0,49        |
| ENSG00000157985 | AGAP1       | -2,24    | 0,50        |
| ENSG00000151623 | NR3C2       | -2,24    | 0,61        |

| ensembl gene    | gene symbol   | Score(d) | Fold Change |
|-----------------|---------------|----------|-------------|
| ENSG00000168404 | MLKL          | -2,24    | 0,47        |
| ENSG00000115042 | FAHD2A        | -2,24    | 0,58        |
| ENSG00000187193 | MT1X          | -2,24    | 0,40        |
| ENSG00000163563 | MNDA          | -2,24    | 0,42        |
| ENSG00000188124 | OR2AG2        | -2,24    | 0,60        |
| ENSG00000140443 | IGF1R         | -2,24    | 0,55        |
| ENSG00000178719 | GRINA         | -2,24    | 0,67        |
| ENSG00000178917 | ZNF852        | -2,24    | 0,71        |
| ENSG00000270024 | C8orf44-SGK3  | -2,24    | 0,49        |
| ENSG00000166825 | ANPEP         | -2,24    | 0,59        |
| ENSG00000249948 | GBA3          | -2,24    | 0,47        |
| ENSG00000100228 | RAB36         | -2,24    | 0,48        |
| ENSG00000137040 | RANBP6        | -2,24    | 0,61        |
| ENSG00000188573 | FBLL1         | -2,24    | 0,81        |
| ENSG00000140262 | TCF12         | -2,24    | 0,76        |
| ENSG00000176994 | SMCR8         | -2,24    | 0,73        |
| ENSG00000142494 | SLC47A1       | -2,24    | 0,21        |
| ENSG00000177830 | CHID1         | -2,25    | 0,67        |
| ENSG00000166669 | ATF7IP2       | -2,25    | 0,40        |
| ENSG00000166503 | RP11-382A20.3 | -2,25    | 0,81        |
| ENSG00000186487 | MYT1L         | -2,25    | 0,70        |
| ENSG00000152455 | SUV39H2       | -2,25    | 0,58        |
| ENSG00000182896 | TMEM95        | -2,25    | 0,82        |
| ENSG00000117691 | NENF          | -2,25    | 0,67        |
| ENSG00000102053 | ZC3H12B       | -2,25    | 0,48        |
| ENSG00000168872 | DDX19A        | -2,25    | 0,69        |
| ENSG00000197782 | ZNF780A       | -2,25    | 0,64        |
| ENSG00000132612 | VPS4A         | -2,25    | 0,62        |
| ENSG00000188086 | PRSS45        | -2,25    | 0,71        |
| ENSG00000125245 | GPR18         | -2,25    | 0,75        |
| ENSG00000110057 | UNC93B1       | -2,25    | 0,67        |
| ENSG00000139874 | SSTR1         | -2,25    | 0,79        |
| ENSG00000164597 | COG5          | -2,25    | 0,67        |
| ENSG00000187118 | CMC1          | -2,25    | 0,61        |
| ENSG00000144120 | TMEM177       | -2,25    | 0,57        |
| ENSG00000205209 | SCGB2B2       | -2,25    | 0,71        |
| ENSG00000113328 | CCNG1         | -2,25    | 0,74        |
| ENSG00000043039 | BARX2         | -2,25    | 0,57        |
| ENSG00000157216 | SSBP3         | -2,26    | 0,70        |
| ENSG00000168310 | IRF2          | -2,26    | 0,52        |
| ENSG00000143811 | PYCR2         | -2,26    | 0,59        |
| ENSG00000116962 | NID1          | -2,26    | 0,77        |
| ENSG00000035403 | VCL           | -2,26    | 0,62        |
| ENSG00000108784 | NAGLU         | -2,26    | 0,45        |
| ENSG00000159618 | ADGRG5        | -2,26    | 0,43        |
| ENSG00000182183 | FAM159A       | -2,26    | 0,53        |
| ENSG00000108306 | FBXL20        | -2,26    | 0,64        |
| ENSG00000156575 | PRG3          | -2,26    | 0,62        |
| ENSG00000136295 | TTYH3         | -2,26    | 0,71        |



| ensembl gene    | gene symbol | Score(d) | Fold Change |
|-----------------|-------------|----------|-------------|
| ENSG00000183808 | RBM12B      | -2,27    | 0,63        |
| ENSG00000156463 | SH3RF2      | -2,27    | 0,60        |
| ENSG00000213626 | LBH         | -2,27    | 0,68        |
| ENSG00000241399 | CD302       | -2,27    | 0,57        |
| ENSG00000158435 | CNOT11      | -2,27    | 0,81        |
| ENSG00000175592 | FOSL1       | -2,27    | 0,79        |
| ENSG00000174579 | MSL2        | -2,27    | 0,65        |
| ENSG00000107829 | FBXW4       | -2,27    | 0,62        |
| ENSG00000168243 | GNG4        | -2,27    | 0,72        |
| ENSG00000077157 | PPP1R12B    | -2,27    | 0,58        |
| ENSG00000173409 | ARV1        | -2,27    | 0,62        |
| ENSG00000171604 | CXXC5       | -2,27    | 0,60        |
| ENSG00000176182 | MYPOP       | -2,27    | 0,76        |
| ENSG00000125637 | PSD4        | -2,27    | 0,75        |
| ENSG00000156869 | FRRS1       | -2,27    | 0,60        |
| ENSG00000138944 | KIAA1644    | -2,27    | 0,76        |
| ENSG00000173210 | ABLIM3      | -2,27    | 0,78        |
| ENSG00000169435 | RASSF6      | -2,27    | 0,35        |
| ENSG00000169764 | UGP2        | -2,28    | 0,67        |
| ENSG00000175536 | LIPT2       | -2,28    | 0,74        |
| ENSG00000111348 | ARHGDIB     | -2,28    | 0,73        |
| ENSG00000122728 | TAF1L       | -2,28    | 0,79        |
| ENSG00000137393 | RNF144B     | -2,28    | 0,31        |
| ENSG00000132640 | BTBD3       | -2,28    | 0,31        |
| ENSG00000078967 | UBE2D4      | -2,28    | 0,68        |
| ENSG00000131368 | MRPS25      | -2,28    | 0,75        |
| ENSG00000164035 | EMCN        | -2,28    | 0,68        |
| ENSG00000167861 | HID1        | -2,28    | 0,59        |
| ENSG00000197774 | EME2        | -2,28    | 0,78        |
| ENSG00000163875 | MEAF6       | -2,29    | 0,74        |
| ENSG00000175567 | UCP2        | -2,29    | 0,51        |
| ENSG00000258223 | PRSS58      | -2,29    | 0,83        |
| ENSG00000171843 | MLLT3       | -2,29    | 0,58        |
| ENSG00000164576 | SAP30L      | -2,29    | 0,66        |
| ENSG00000007129 | CEACAM21    | -2,29    | 0,65        |
| ENSG00000198728 | LDB1        | -2,29    | 0,65        |
| ENSG00000154945 | ANKRD40     | -2,29    | 0,74        |
| ENSG00000073598 | FNDC8       | -2,29    | 0,88        |
| ENSG00000135423 | GLS2        | -2,29    | 0,75        |
| ENSG00000127920 | GNG11       | -2,29    | 0,57        |
| ENSG00000264364 | DYNLL2      | -2,29    | 0,66        |
| ENSG00000102837 | OLFM4       | -2,29    | 0,35        |
| ENSG00000165682 | CLEC1B      | -2,29    | 0,74        |
| ENSG00000168646 | AXIN2       | -2,29    | 0,57        |
| ENSG00000079841 | RIMS1       | -2,30    | 0,39        |
| ENSG00000100600 | LGMN        | -2,30    | 0,41        |
| ENSG00000179776 | CDH5        | -2,30    | 0,78        |
| ENSG00000137210 | TMEM14B     | -2,30    | 0,70        |
| ENSG00000110074 | FOXRED1     | -2,30    | 0,71        |

| ensembl gene    | gene symbol  | Score(d) | Fold Change |
|-----------------|--------------|----------|-------------|
| ENSG00000132313 | MRPL35       | -2,30    | 0,61        |
| ENSG00000134452 | FBXO18       | -2,30    | 0,62        |
| ENSG00000119335 | SET          | -2,30    | 0,64        |
| ENSG00000162148 | PPP1R32      | -2,30    | 0,81        |
| ENSG00000157637 | SLC38A10     | -2,30    | 0,63        |
| ENSG00000100504 | PYGL         | -2,31    | 0,48        |
| ENSG00000162722 | TRIM58       | -2,31    | 0,78        |
| ENSG00000177354 | C10orf71     | -2,31    | 0,69        |
| ENSG00000163545 | NUAK2        | -2,31    | 0,52        |
| ENSG00000147573 | TRIM55       | -2,31    | 0,42        |
| ENSG00000166432 | ZMAT1        | -2,31    | 0,46        |
| ENSG00000158201 | ABHD3        | -2,31    | 0,68        |
| ENSG00000099814 | CEP170B      | -2,31    | 0,69        |
| ENSG00000103037 | SETD6        | -2,31    | 0,68        |
| ENSG00000175857 | GAPT         | -2,31    | 0,64        |
| ENSG00000119899 | SLC17A5      | -2,31    | 0,66        |
| ENSG00000112679 | DUSP22       | -2,31    | 0,60        |
| ENSG00000100218 | RSPH14       | -2,31    | 0,66        |
| ENSG00000182087 | TMEM259      | -2,31    | 0,64        |
| ENSG00000115020 | PIKFYVE      | -2,31    | 0,65        |
| ENSG00000115446 | UNC50        | -2,31    | 0,73        |
| ENSG00000081052 | COL4A4       | -2,32    | 0,70        |
| ENSG00000122188 | LAX1         | -2,32    | 0,42        |
| ENSG00000073169 | SELO         | -2,32    | 0,76        |
| ENSG00000154930 | ACSS1        | -2,32    | 0,51        |
| ENSG00000185669 | SNAI3        | -2,32    | 0,75        |
| ENSG00000160688 | FLAD1        | -2,32    | 0,60        |
| ENSG00000104967 | NOVA2        | -2,32    | 0,62        |
| ENSG00000143621 | ILF2         | -2,32    | 0,79        |
| ENSG00000122641 | INHBA        | -2,32    | 0,78        |
| ENSG00000143457 | GOLPH3L      | -2,33    | 0,47        |
| ENSG00000105650 | PDE4C        | -2,33    | 0,78        |
| ENSG00000205364 | MT1M         | -2,33    | 0,68        |
| ENSG00000173890 | GPR160       | -2,33    | 0,53        |
| ENSG00000149346 | SLX4IP       | -2,33    | 0,58        |
| ENSG00000065526 | SPEN         | -2,33    | 0,67        |
| ENSG00000103043 | VAC14        | -2,33    | 0,68        |
| ENSG00000267561 | RP5-1052I5.2 | -2,33    | 0,58        |
| ENSG00000099834 | CDHR5        | -2,33    | 0,80        |
| ENSG00000130024 | PHF10        | -2,33    | 0,71        |
| ENSG00000100985 | MMP9         | -2,34    | 0,37        |
| ENSG00000106823 | ECM2         | -2,34    | 0,68        |
| ENSG00000128052 | KDR          | -2,34    | 0,74        |
| ENSG00000179832 | MROH1        | -2,34    | 0,77        |
| ENSG00000131779 | PEX11B       | -2,34    | 0,58        |
| ENSG00000169439 | SDC2         | -2,34    | 0,26        |
| ENSG00000125835 | SNRPB        | -2,34    | 0,62        |
| ENSG00000182022 | CHST15       | -2,34    | 0,59        |
| ENSG00000066382 | MPPED2       | -2,35    | 0,33        |

| ensembl gene    | gene symbol | Score(d) | Fold Change |
|-----------------|-------------|----------|-------------|
| ENSG00000154429 | CCSAP       | -2,35    | 0,50        |
| ENSG00000137801 | THBS1       | -2,35    | 0,36        |
| ENSG00000240184 | PCDHGC3     | -2,35    | 0,50        |
| ENSG00000163877 | SNIP1       | -2,35    | 0,62        |
| ENSG00000101307 | SIRPB1      | -2,35    | 0,59        |
| ENSG00000089063 | TMEM230     | -2,35    | 0,76        |
| ENSG00000163138 | PACRGL      | -2,35    | 0,46        |
| ENSG00000198833 | UBE2J1      | -2,35    | 0,81        |
| ENSG00000179085 | DPM3        | -2,35    | 0,63        |
| ENSG00000206102 | KRTAP19-8   | -2,35    | 0,38        |
| ENSG00000164830 | OXR1        | -2,35    | 0,65        |
| ENSG00000197530 | MIB2        | -2,35    | 0,76        |
| ENSG00000164654 | MIOS        | -2,35    | 0,57        |
| ENSG00000112232 | KHDRBS2     | -2,35    | 0,39        |
| ENSG00000180447 | GAS1        | -2,35    | 0,67        |
| ENSG00000204231 | RXRB        | -2,35    | 0,76        |
| ENSG00000237172 | B3GNT9      | -2,36    | 0,60        |
| ENSG00000177138 | FAM9B       | -2,36    | 0,77        |
| ENSG00000013016 | EHD3        | -2,36    | 0,40        |
| ENSG00000119508 | NR4A3       | -2,36    | 0,45        |
| ENSG00000088179 | PTPN4       | -2,36    | 0,66        |
| ENSG00000196126 | HLA-DRB1    | -2,36    | 0,34        |
| ENSG00000174943 | KCTD13      | -2,36    | 0,78        |
| ENSG00000127837 | AAMP        | -2,36    | 0,74        |
| ENSG00000188938 | FAM120AOS   | -2,36    | 0,71        |
| ENSG00000113595 | TRIM23      | -2,36    | 0,68        |
| ENSG00000167523 | SPATA33     | -2,36    | 0,54        |
| ENSG00000180658 | OR2A4       | -2,36    | 0,75        |
| ENSG00000090581 | GNPTG       | -2,36    | 0,53        |
| ENSG00000113194 | FAF2        | -2,36    | 0,76        |
| ENSG00000106077 | ABHD11      | -2,36    | 0,67        |
| ENSG00000153707 | PTPRD       | -2,36    | 0,45        |
| ENSG00000162511 | LAPTM5      | -2,36    | 0,28        |
| ENSG00000255823 | MTRNR2L8    | -2,36    | 0,77        |
| ENSG00000187650 | VMAC        | -2,36    | 0,72        |
| ENSG00000204531 | POU5F1      | -2,36    | 0,43        |
| ENSG00000129657 | SEC14L1     | -2,37    | 0,62        |
| ENSG00000116497 | S100PBP     | -2,37    | 0,61        |
| ENSG00000177570 | SAMD12      | -2,37    | 0,44        |
| ENSG00000135407 | AVIL        | -2,37    | 0,67        |
| ENSG00000182870 | GALNT9      | -2,37    | 0,59        |
| ENSG00000187147 | RNF220      | -2,37    | 0,75        |
| ENSG00000114902 | SPCS1       | -2,37    | 0,78        |
| ENSG00000150977 | RILPL2      | -2,37    | 0,54        |
| ENSG00000087460 | GNAS        | -2,37    | 0,78        |
| ENSG00000072657 | TRHDE       | -2,37    | 0,63        |
| ENSG00000039600 | SOX30       | -2,37    | 0,74        |
| ENSG00000086506 | HBQ1        | -2,37    | 0,77        |
| ENSG00000163083 | INHBB       | -2,37    | 0,83        |

| ensembl gene    | gene symbol | Score(d) | Fold Change |
|-----------------|-------------|----------|-------------|
| ENSG00000116017 | ARID3A      | -2,38    | 0,69        |
| ENSG00000090402 | SI          | -2,38    | 0,59        |
| ENSG00000135686 | KLHL36      | -2,38    | 0,51        |
| ENSG00000063322 | MED29       | -2,38    | 0,80        |
| ENSG00000122254 | HS3ST2      | -2,38    | 0,62        |
| ENSG00000197594 | ENPP1       | -2,38    | 0,28        |
| ENSG00000178665 | ZNF713      | -2,38    | 0,46        |
| ENSG00000128383 | APOBEC3A    | -2,38    | 0,53        |
| ENSG00000243317 | C7orf73     | -2,38    | 0,70        |
| ENSG00000002745 | WNT16       | -2,38    | 0,61        |
| ENSG00000149357 | LAMTOR1     | -2,38    | 0,62        |
| ENSG00000163463 | KRTCAP2     | -2,39    | 0,71        |
| ENSG00000215883 | CYB5RL      | -2,39    | 0,73        |
| ENSG00000078177 | N4BP2       | -2,39    | 0,63        |
| ENSG00000154822 | PLCL2       | -2,39    | 0,50        |
| ENSG00000160796 | NBEAL2      | -2,39    | 0,49        |
| ENSG00000174500 | GCSAM       | -2,39    | 0,28        |
| ENSG00000159899 | NPR2        | -2,39    | 0,65        |
| ENSG00000213347 | MXD3        | -2,39    | 0,64        |
| ENSG00000225973 | PIGBOS1     | -2,39    | 0,76        |
| ENSG00000203710 | CR1         | -2,39    | 0,49        |
| ENSG00000204815 | TTC25       | -2,39    | 0,78        |
| ENSG00000136100 | VPS36       | -2,39    | 0,65        |
| ENSG00000125409 | TEKT3       | -2,39    | 0,67        |
| ENSG00000260314 | MRC1        | -2,39    | 0,70        |
| ENSG00000040487 | PQLC2       | -2,39    | 0,68        |
| ENSG00000130208 | APOC1       | -2,40    | 0,58        |
| ENSG00000186132 | C2orf76     | -2,40    | 0,61        |
| ENSG00000130312 | MRPL34      | -2,40    | 0,57        |
| ENSG00000165209 | STRBP       | -2,40    | 0,58        |
| ENSG00000182158 | CREB3L2     | -2,40    | 0,65        |
| ENSG00000103313 | MEFV        | -2,40    | 0,62        |
| ENSG00000228439 | TSTD3       | -2,40    | 0,63        |
| ENSG00000172466 | ZNF24       | -2,40    | 0,72        |
| ENSG00000133740 | E2F5        | -2,40    | 0,62        |
| ENSG00000115866 | DARS        | -2,41    | 0,61        |
| ENSG00000110719 | TCIRG1      | -2,41    | 0,68        |
| ENSG00000185112 | FAM43A      | -2,41    | 0,54        |
| ENSG00000141627 | DYM         | -2,41    | 0,75        |
| ENSG00000167419 | LPO         | -2,41    | 0,63        |
| ENSG00000178585 | CTNNBIP1    | -2,41    | 0,82        |
| ENSG00000197070 | ARRDC1      | -2,41    | 0,69        |
| ENSG00000162729 | IGSF8       | -2,41    | 0,67        |
| ENSG00000171443 | ZNF524      | -2,42    | 0,80        |
| ENSG00000165997 | ARL5B       | -2,42    | 0,64        |
| ENSG00000112303 | VNN2        | -2,42    | 0,38        |
| ENSG00000196290 | NIF3L1      | -2,42    | 0,62        |
| ENSG00000161664 | ASB16       | -2,42    | 0,72        |
| ENSG00000185278 | ZBTB37      | -2,42    | 0,67        |

| ensembl gene    | gene symbol | Score(d) | Fold Change |
|-----------------|-------------|----------|-------------|
| ENSG00000172086 | KRCC1       | -2,42    | 0,59        |
| ENSG00000164080 | RAD54L2     | -2,42    | 0,72        |
| ENSG00000089022 | MAPKAPK5    | -2,43    | 0,76        |
| ENSG00000157741 | UBN2        | -2,43    | 0,65        |
| ENSG00000164587 | RPS14       | -2,43    | 0,66        |
| ENSG00000134744 | ZCCHC11     | -2,43    | 0,64        |
| ENSG00000196329 | GIMAP5      | -2,43    | 0,38        |
| ENSG00000105793 | GTPBP10     | -2,43    | 0,62        |
| ENSG00000130748 | TMEM160     | -2,43    | 0,53        |
| ENSG00000134326 | CMPK2       | -2,43    | 0,37        |
| ENSG00000196569 | LAMA2       | -2,43    | 0,28        |
| ENSG00000198108 | CHSY3       | -2,43    | 0,37        |
| ENSG00000167635 | ZNF146      | -2,44    | 0,63        |
| ENSG00000187474 | FPR3        | -2,44    | 0,64        |
| ENSG00000048462 | TNFRSF17    | -2,44    | 0,44        |
| ENSG00000213015 | ZNF580      | -2,44    | 0,82        |
| ENSG00000182919 | C11orf54    | -2,44    | 0,64        |
| ENSG00000205038 | PKHD1L1     | -2,44    | 0,52        |
| ENSG00000186529 | CYP4F3      | -2,44    | 0,50        |
| ENSG00000160917 | CPSF4       | -2,45    | 0,61        |
| ENSG00000161980 | POLR3K      | -2,45    | 0,63        |
| ENSG00000100578 | KIAA0586    | -2,45    | 0,64        |
| ENSG00000112936 | C7          | -2,45    | 0,57        |
| ENSG00000221869 | CEBPD       | -2,45    | 0,71        |
| ENSG00000124256 | ZBP1        | -2,45    | 0,55        |
| ENSG00000091106 | NLRC4       | -2,45    | 0,79        |
| ENSG00000133878 | DUSP26      | -2,45    | 0,43        |
| ENSG00000134574 | DDB2        | -2,45    | 0,61        |
| ENSG00000154229 | PRKCA       | -2,45    | 0,30        |
| ENSG00000187815 | ZFP69       | -2,45    | 0,65        |
| ENSG00000119725 | ZNF410      | -2,45    | 0,43        |
| ENSG00000173391 | OLR1        | -2,45    | 0,51        |
| ENSG00000050820 | BCAR1       | -2,45    | 0,60        |
| ENSG00000116525 | TRIM62      | -2,45    | 0,64        |
| ENSG00000091490 | SEL1L3      | -2,45    | 0,56        |
| ENSG00000148943 | LIN7C       | -2,46    | 0,64        |
| ENSG00000169962 | TAS1R3      | -2,46    | 0,62        |
| ENSG00000010626 | LRRC23      | -2,46    | 0,68        |
| ENSG00000147799 | ARHGAP39    | -2,46    | 0,61        |
| ENSG00000102221 | JADE3       | -2,46    | 0,62        |
| ENSG00000176209 | SMIM19      | -2,46    | 0,52        |
| ENSG00000173065 | FAM222B     | -2,46    | 0,68        |
| ENSG00000138175 | ARL3        | -2,46    | 0,64        |
| ENSG00000119912 | IDE         | -2,46    | 0,70        |
| ENSG00000176444 | CLK2        | -2,46    | 0,60        |
| ENSG00000136731 | UGGT1       | -2,46    | 0,76        |
| ENSG00000106868 | SUSD1       | -2,47    | 0,42        |
| ENSG00000129151 | BBOX1       | -2,47    | 0,58        |
| ENSG00000163795 | ZNF513      | -2,47    | 0,77        |

| ensembl gene    | gene symbol | Score(d) | Fold Change |
|-----------------|-------------|----------|-------------|
| ENSG00000187742 | SECISBP2    | -2,47    | 0,75        |
| ENSG00000185900 | POMK        | -2,47    | 0,54        |
| ENSG00000151612 | ZNF827      | -2,47    | 0,61        |
| ENSG00000126261 | UBA2        | -2,47    | 0,68        |
| ENSG00000051620 | HEBP2       | -2,47    | 0,61        |
| ENSG00000160058 | BSDC1       | -2,47    | 0,66        |
| ENSG00000107147 | KCNT1       | -2,47    | 0,67        |
| ENSG00000225698 | IGHV3-72    | -2,47    | 0,42        |
| ENSG00000149212 | SESN3       | -2,47    | 0,66        |
| ENSG00000116918 | TSNAX       | -2,47    | 0,36        |
| ENSG00000151893 | CACUL1      | -2,47    | 0,67        |
| ENSG00000104154 | SLC30A4     | -2,47    | 0,61        |
| ENSG00000180340 | FZD2        | -2,47    | 0,78        |
| ENSG00000104765 | BNIP3L      | -2,48    | 0,71        |
| ENSG00000007541 | PIGQ        | -2,48    | 0,61        |
| ENSG00000167346 | MMP26       | -2,48    | 0,77        |
| ENSG00000152443 | ZNF776      | -2,48    | 0,60        |
| ENSG00000106638 | TBL2        | -2,48    | 0,67        |
| ENSG00000158195 | WASF2       | -2,48    | 0,68        |
| ENSG00000188021 | UBQLN2      | -2,48    | 0,65        |
| ENSG00000215455 | KRTAP10-1   | -2,48    | 0,63        |
| ENSG00000121053 | EPX         | -2,48    | 0,38        |
| ENSG00000102763 | VWA8        | -2,48    | 0,60        |
| ENSG00000188033 | ZNF490      | -2,48    | 0,71        |
| ENSG00000162739 | SLAMF6      | -2,48    | 0,20        |
| ENSG00000136156 | ITM2B       | -2,48    | 0,74        |
| ENSG00000265190 | ANXA8       | -2,49    | 0,72        |
| ENSG00000118260 | CREB1       | -2,49    | 0,70        |
| ENSG00000198881 | ASB12       | -2,49    | 0,77        |
| ENSG00000168036 | CTNNB1      | -2,49    | 0,57        |
| ENSG00000179151 | EDC3        | -2,49    | 0,55        |
| ENSG00000111652 | COPS7A      | -2,49    | 0,65        |
| ENSG00000100299 | ARSA        | -2,49    | 0,59        |
| ENSG00000145012 | LPP         | -2,49    | 0,57        |
| ENSG00000169519 | METTL15     | -2,49    | 0,50        |
| ENSG00000103363 | TCEB2       | -2,49    | 0,65        |
| ENSG00000168763 | CNNM3       | -2,49    | 0,73        |
| ENSG00000188554 | NBR1        | -2,49    | 0,62        |
| ENSG00000230510 | PPP5D1      | -2,49    | 0,72        |
| ENSG00000046647 | GEMIN8      | -2,50    | 0,65        |
| ENSG00000123096 | SSPN        | -2,50    | 0,51        |
| ENSG00000133812 | SBF2        | -2,50    | 0,35        |
| ENSG00000147654 | EBAG9       | -2,50    | 0,74        |
| ENSG00000159199 | ATP5G1      | -2,50    | 0,41        |
| ENSG00000105323 | HNRNPUL1    | -2,50    | 0,75        |
| ENSG00000133818 | RRAS2       | -2,50    | 0,20        |
| ENSG00000141458 | NPC1        | -2,50    | 0,54        |
| ENSG00000196812 | ZSCAN16     | -2,51    | 0,65        |
| ENSG00000053770 | AP5M1       | -2,51    | 0,71        |

| ensembl gene    | gene symbol | Score(d) | Fold Change |
|-----------------|-------------|----------|-------------|
| ENSG00000051523 | CYBA        | -2,51    | 0,64        |
| ENSG00000167964 | RAB26       | -2,51    | 0,69        |
| ENSG00000152291 | TGOLN2      | -2,51    | 0,73        |
| ENSG00000168530 | MYL1        | -2,51    | 0,57        |
| ENSG00000146083 | RNF44       | -2,51    | 0,66        |
| ENSG00000164142 | FAM160A1    | -2,51    | 0,27        |
| ENSG00000162735 | PEX19       | -2,51    | 0,69        |
| ENSG00000171236 | LRG1        | -2,51    | 0,61        |
| ENSG00000113448 | PDE4D       | -2,51    | 0,22        |
| ENSG00000102760 | RGCC        | -2,51    | 0,25        |
| ENSG00000108950 | FAM20A      | -2,51    | 0,71        |
| ENSG00000170142 | UBE2E1      | -2,51    | 0,58        |
| ENSG00000155275 | TRMT44      | -2,52    | 0,71        |
| ENSG00000143252 | SDHC        | -2,52    | 0,62        |
| ENSG00000177380 | PPFIA3      | -2,52    | 0,65        |
| ENSG00000109220 | CHIC2       | -2,52    | 0,61        |
| ENSG00000138061 | CYP1B1      | -2,52    | 0,64        |
| ENSG00000169116 | PARM1       | -2,52    | 0,48        |
| ENSG00000121316 | PLBD1       | -2,52    | 0,37        |
| ENSG00000109083 | IFT20       | -2,52    | 0,65        |
| ENSG00000147454 | SLC25A37    | -2,52    | 0,64        |
| ENSG00000109133 | TMEM33      | -2,52    | 0,71        |
| ENSG00000132906 | CASP9       | -2,52    | 0,77        |
| ENSG00000120279 | MYCT1       | -2,52    | 0,71        |
| ENSG00000077044 | DGKD        | -2,52    | 0,53        |
| ENSG00000282218 | RP1-179P9.3 | -2,52    | 0,51        |
| ENSG00000169877 | AHSP        | -2,53    | 0,42        |
| ENSG00000168556 | ING2        | -2,53    | 0,73        |
| ENSG00000188167 | TMPPE       | -2,53    | 0,59        |
| ENSG00000171388 | APLN        | -2,53    | 0,74        |
| ENSG00000109436 | TBC1D9      | -2,53    | 0,58        |
| ENSG00000079150 | FKBP7       | -2,53    | 0,51        |
| ENSG00000177469 | PTRF        | -2,53    | 0,77        |
| ENSG00000171310 | CHST11      | -2,53    | 0,41        |
| ENSG00000176422 | SPRYD4      | -2,53    | 0,56        |
| ENSG00000162736 | NCSTN       | -2,53    | 0,69        |
| ENSG00000152464 | RPP38       | -2,53    | 0,68        |
| ENSG00000173372 | C1QA        | -2,54    | 0,53        |
| ENSG00000084693 | AGBL5       | -2,54    | 0,64        |
| ENSG00000085224 | ATRX        | -2,54    | 0,63        |
| ENSG00000136059 | VILL        | -2,54    | 0,76        |
| ENSG00000166352 | C11orf74    | -2,54    | 0,51        |
| ENSG00000135070 | ISCA1       | -2,54    | 0,76        |
| ENSG00000189056 | RELN        | -2,54    | 0,28        |
| ENSG00000138443 | ABI2        | -2,54    | 0,57        |
| ENSG00000144677 | CTDSPL      | -2,54    | 0,64        |
| ENSG00000213865 | C8orf44     | -2,54    | 0,56        |
| ENSG00000170634 | ACYP2       | -2,54    | 0,75        |
| ENSG00000213859 | KCTD11      | -2,54    | 0,68        |

| ensembl gene    | gene symbol | Score(d) | Fold Change |
|-----------------|-------------|----------|-------------|
| ENSG00000090975 | PITPNM2     | -2,54    | 0,70        |
| ENSG00000133114 | GPALPP1     | -2,55    | 0,68        |
| ENSG00000163884 | KLF15       | -2,55    | 0,65        |
| ENSG00000178562 | CD28        | -2,55    | 0,22        |
| ENSG00000137504 | CREBZF      | -2,55    | 0,69        |
| ENSG00000125734 | GPR108      | -2,55    | 0,63        |
| ENSG00000110435 | PDHX        | -2,55    | 0,64        |
| ENSG00000175137 | SH3BP5L     | -2,56    | 0,57        |
| ENSG00000118520 | ARG1        | -2,56    | 0,56        |
| ENSG00000100234 | TIMP3       | -2,56    | 0,71        |
| ENSG00000087253 | LPCAT2      | -2,56    | 0,37        |
| ENSG00000120913 | PDLIM2      | -2,56    | 0,69        |
| ENSG00000137726 | FXYP6       | -2,56    | 0,60        |
| ENSG00000138593 | SECISBP2L   | -2,56    | 0,56        |
| ENSG00000111653 | ING4        | -2,56    | 0,59        |
| ENSG00000126351 | THRA        | -2,56    | 0,60        |
| ENSG00000075914 | EXOSC7      | -2,56    | 0,69        |
| ENSG00000094916 | CBX5        | -2,56    | 0,56        |
| ENSG00000237541 | HLA-DQA2    | -2,56    | 0,75        |
| ENSG00000198018 | ENTPD7      | -2,56    | 0,75        |
| ENSG00000135605 | TEC         | -2,56    | 0,55        |
| ENSG00000155659 | VSIG4       | -2,56    | 0,63        |
| ENSG00000137101 | CD72        | -2,56    | 0,66        |
| ENSG00000166471 | TMEM41B     | -2,56    | 0,68        |
| ENSG00000043143 | JADE2       | -2,56    | 0,62        |
| ENSG00000173757 | STAT5B      | -2,56    | 0,46        |
| ENSG00000166927 | MS4A7       | -2,56    | 0,37        |
| ENSG00000213619 | NDUFS3      | -2,57    | 0,66        |
| ENSG00000103222 | ABCC1       | -2,57    | 0,43        |
| ENSG00000011405 | PIK3C2A     | -2,57    | 0,63        |
| ENSG00000105738 | SIPA1L3     | -2,57    | 0,59        |
| ENSG00000196865 | NHLRC2      | -2,57    | 0,59        |
| ENSG00000167363 | FN3K        | -2,57    | 0,29        |
| ENSG00000109099 | PMP22       | -2,57    | 0,60        |
| ENSG00000149634 | SPATA25     | -2,57    | 0,66        |
| ENSG00000169871 | TRIM56      | -2,57    | 0,52        |
| ENSG00000155957 | TMBIM4      | -2,57    | 0,70        |
| ENSG00000149262 | INTS4       | -2,57    | 0,59        |
| ENSG00000087095 | NLK         | -2,57    | 0,47        |
| ENSG00000166233 | ARIH1       | -2,57    | 0,65        |
| ENSG00000233493 | TMEM238     | -2,57    | 0,56        |
| ENSG00000101439 | CST3        | -2,57    | 0,35        |
| ENSG00000123384 | LRP1        | -2,57    | 0,42        |
| ENSG00000178104 | PDE4DIP     | -2,58    | 0,51        |
| ENSG00000184716 | SERINC4     | -2,58    | 0,59        |
| ENSG00000215454 | KRTAP10-4   | -2,58    | 0,71        |
| ENSG00000105205 | CLC         | -2,58    | 0,27        |
| ENSG00000172375 | C2CD2L      | -2,58    | 0,64        |
| ENSG00000185305 | ARL15       | -2,58    | 0,58        |



| ensembl gene    | gene symbol | Score(d) | Fold Change |
|-----------------|-------------|----------|-------------|
| ENSG00000107719 | PALD1       | -2,58    | 0,52        |
| ENSG00000120594 | PLXDC2      | -2,58    | 0,47        |
| ENSG00000168229 | PTGDR       | -2,58    | 0,53        |
| ENSG00000168300 | PCMTD1      | -2,58    | 0,61        |
| ENSG00000135525 | MAP7        | -2,59    | 0,41        |
| ENSG00000125107 | CNOT1       | -2,59    | 0,54        |
| ENSG00000112237 | CCNC        | -2,59    | 0,62        |
| ENSG00000167642 | SPINT2      | -2,59    | 0,28        |
| ENSG00000257365 | FNTB        | -2,59    | 0,56        |
| ENSG00000163633 | C4orf36     | -2,59    | 0,69        |
| ENSG00000125571 | IL37        | -2,59    | 0,68        |
| ENSG00000166211 | SPIC        | -2,59    | 0,32        |
| ENSG00000139197 | PEX5        | -2,59    | 0,66        |
| ENSG00000073417 | PDE8A       | -2,59    | 0,73        |
| ENSG00000203943 | SAMD13      | -2,60    | 0,54        |
| ENSG00000112378 | PERP        | -2,60    | 0,56        |
| ENSG00000144455 | SUMF1       | -2,60    | 0,60        |
| ENSG00000104324 | CPQ         | -2,60    | 0,36        |
| ENSG00000003400 | CASP10      | -2,60    | 0,64        |
| ENSG00000133048 | CHI3L1      | -2,60    | 0,47        |
| ENSG00000197943 | PLCG2       | -2,60    | 0,59        |
| ENSG00000121741 | ZMYM2       | -2,60    | 0,58        |
| ENSG00000119535 | CSF3R       | -2,60    | 0,41        |
| ENSG00000072756 | TRNT1       | -2,60    | 0,64        |
| ENSG00000167644 | C19orf33    | -2,60    | 0,64        |
| ENSG00000088812 | ATRN        | -2,61    | 0,63        |
| ENSG00000100105 | PATZ1       | -2,61    | 0,67        |
| ENSG00000103064 | SLC7A6      | -2,61    | 0,54        |
| ENSG00000165632 | TAF3        | -2,61    | 0,71        |
| ENSG00000174695 | TMEM167A    | -2,61    | 0,71        |
| ENSG00000112658 | SRF         | -2,61    | 0,67        |
| ENSG00000120088 | CRHR1       | -2,61    | 0,57        |
| ENSG00000178409 | BEND3       | -2,61    | 0,66        |
| ENSG00000093009 | CDC45       | -2,61    | 0,62        |
| ENSG00000135473 | PAN2        | -2,62    | 0,51        |
| ENSG00000204713 | TRIM27      | -2,62    | 0,70        |
| ENSG00000089775 | ZBTB25      | -2,62    | 0,72        |
| ENSG00000125337 | KIF25       | -2,62    | 0,78        |
| ENSG00000163528 | CHCHD4      | -2,62    | 0,74        |
| ENSG00000197629 | MPEG1       | -2,62    | 0,37        |
| ENSG00000179941 | BBS10       | -2,62    | 0,63        |
| ENSG00000123095 | BHLHE41     | -2,62    | 0,25        |
| ENSG00000009413 | REV3L       | -2,62    | 0,63        |
| ENSG00000164048 | ZNF589      | -2,62    | 0,61        |
| ENSG00000172264 | MACROD2     | -2,62    | 0,58        |
| ENSG00000213416 | KRTAP4-12   | -2,62    | 0,72        |
| ENSG00000070269 | TMEM260     | -2,62    | 0,60        |
| ENSG00000166428 | PLD4        | -2,62    | 0,28        |
| ENSG00000184867 | ARMCX2      | -2,62    | 0,49        |

| ensembl gene    | gene symbol | Score(d) | Fold Change |
|-----------------|-------------|----------|-------------|
| ENSG00000177238 | TRIM72      | -2,62    | 0,74        |
| ENSG00000117335 | CD46        | -2,62    | 0,58        |
| ENSG00000137502 | RAB30       | -2,62    | 0,57        |
| ENSG00000039319 | ZFYVE16     | -2,62    | 0,53        |
| ENSG00000280165 | PCDH20      | -2,63    | 0,50        |
| ENSG00000118496 | FBXO30      | -2,63    | 0,64        |
| ENSG00000114503 | NCBP2       | -2,63    | 0,70        |
| ENSG00000160679 | CHTOP       | -2,63    | 0,59        |
| ENSG00000052126 | PLEKHA5     | -2,63    | 0,38        |
| ENSG00000131067 | GGT7        | -2,63    | 0,59        |
| ENSG00000143183 | TMCO1       | -2,63    | 0,68        |
| ENSG00000175390 | EIF3F       | -2,63    | 0,78        |
| ENSG00000126759 | CFP         | -2,63    | 0,74        |
| ENSG00000013392 | RWDD2A      | -2,63    | 0,67        |
| ENSG00000250254 | PTTG2       | -2,64    | 0,66        |
| ENSG00000133275 | CSNK1G2     | -2,64    | 0,52        |
| ENSG00000170456 | DENND5B     | -2,64    | 0,63        |
| ENSG00000156928 | MALSU1      | -2,64    | 0,61        |
| ENSG00000155465 | SLC7A7      | -2,64    | 0,49        |
| ENSG00000143297 | FCRL5       | -2,64    | 0,32        |
| ENSG00000076928 | ARHGEF1     | -2,64    | 0,61        |
| ENSG00000165238 | WNK2        | -2,64    | 0,53        |
| ENSG00000104450 | SPAG1       | -2,64    | 0,57        |
| ENSG00000116194 | ANGPTL1     | -2,65    | 0,59        |
| ENSG00000152240 | HAUS1       | -2,65    | 0,53        |
| ENSG00000187486 | KCNJ11      | -2,65    | 0,72        |
| ENSG00000148400 | NOTCH1      | -2,65    | 0,69        |
| ENSG00000167548 | KMT2D       | -2,65    | 0,60        |
| ENSG00000185608 | MRPL40      | -2,65    | 0,57        |
| ENSG00000197536 | C5orf56     | -2,65    | 0,61        |
| ENSG00000106080 | FKBP14      | -2,65    | 0,62        |
| ENSG00000047597 | XK          | -2,65    | 0,63        |
| ENSG00000022267 | FHL1        | -2,65    | 0,17        |
| ENSG00000182489 | XKRX        | -2,65    | 0,32        |
| ENSG00000275385 | CCL18       | -2,66    | 0,65        |
| ENSG00000150681 | RGS18       | -2,66    | 0,51        |
| ENSG00000180660 | MAB21L1     | -2,66    | 0,50        |
| ENSG00000139629 | GALNT6      | -2,66    | 0,61        |
| ENSG00000130368 | MAS1        | -2,66    | 0,71        |
| ENSG00000186166 | CCDC84      | -2,66    | 0,58        |
| ENSG00000157350 | ST3GAL2     | -2,66    | 0,58        |
| ENSG00000168026 | TTC21A      | -2,66    | 0,61        |
| ENSG00000118523 | CTGF        | -2,66    | 0,33        |
| ENSG00000196715 | VKORC1L1    | -2,67    | 0,61        |
| ENSG00000143614 | GATAD2B     | -2,67    | 0,73        |
| ENSG00000148730 | EIF4EBP2    | -2,67    | 0,69        |
| ENSG00000158711 | ELK4        | -2,67    | 0,76        |
| ENSG00000204560 | DHX16       | -2,67    | 0,73        |
| ENSG00000137509 | PRCP        | -2,67    | 0,60        |

| ensembl gene    | gene symbol | Score(d) | Fold Change |
|-----------------|-------------|----------|-------------|
| ENSG00000156467 | UQCRB       | -2,67    | 0,70        |
| ENSG00000144401 | METTL21A    | -2,67    | 0,54        |
| ENSG00000111666 | CHPT1       | -2,67    | 0,45        |
| ENSG00000185245 | GP1BA       | -2,68    | 0,70        |
| ENSG00000175727 | MLXIP       | -2,68    | 0,65        |
| ENSG00000172139 | SLC9C1      | -2,68    | 0,57        |
| ENSG00000153048 | CARHSP1     | -2,68    | 0,67        |
| ENSG00000198856 | OSTC        | -2,68    | 0,71        |
| ENSG00000240764 | PCDHGC5     | -2,68    | 0,54        |
| ENSG00000165494 | PCF11       | -2,68    | 0,64        |
| ENSG00000178922 | HYI         | -2,68    | 0,59        |
| ENSG00000088053 | GP6         | -2,68    | 0,73        |
| ENSG00000184640 | SEPTIN9     | -2,68    | 0,56        |
| ENSG00000197646 | PDCD1LG2    | -2,68    | 0,44        |
| ENSG00000186591 | UBE2H       | -2,68    | 0,68        |
| ENSG00000158042 | MRPL17      | -2,68    | 0,53        |
| ENSG00000188211 | NCR3LG1     | -2,68    | 0,47        |
| ENSG00000164548 | TRA2A       | -2,68    | 0,75        |
| ENSG00000187239 | FNBP1       | -2,68    | 0,17        |
| ENSG00000108773 | KAT2A       | -2,68    | 0,54        |
| ENSG00000171606 | ZNF274      | -2,68    | 0,65        |
| ENSG00000086598 | TMED2       | -2,68    | 0,77        |
| ENSG00000177076 | ACER2       | -2,69    | 0,53        |
| ENSG00000239264 | TXNDC5      | -2,69    | 0,44        |
| ENSG00000144445 | KANSL1L     | -2,69    | 0,44        |
| ENSG00000107341 | UBE2R2      | -2,69    | 0,66        |
| ENSG00000040633 | PHF23       | -2,69    | 0,66        |
| ENSG00000174238 | PITPNA      | -2,69    | 0,63        |
| ENSG00000101938 | CHRD1L      | -2,69    | 0,61        |
| ENSG00000038427 | VCAN        | -2,69    | 0,57        |
| ENSG00000144840 | RABL3       | -2,69    | 0,61        |
| ENSG00000072042 | RDH11       | -2,69    | 0,65        |
| ENSG00000101624 | CEP76       | -2,69    | 0,62        |
| ENSG00000165490 | DDIAS       | -2,70    | 0,41        |
| ENSG00000144792 | ZNF660      | -2,70    | 0,32        |
| ENSG00000135678 | CPM         | -2,70    | 0,34        |
| ENSG00000169031 | COL4A3      | -2,70    | 0,47        |
| ENSG00000102780 | DGKH        | -2,70    | 0,65        |
| ENSG00000175899 | A2M         | -2,70    | 0,41        |
| ENSG00000115828 | QPCT        | -2,70    | 0,13        |
| ENSG00000179909 | ZNF154      | -2,70    | 0,50        |
| ENSG00000165185 | KIAA1958    | -2,70    | 0,65        |
| ENSG00000103381 | CPPED1      | -2,70    | 0,35        |
| ENSG00000175482 | POLD4       | -2,70    | 0,56        |
| ENSG00000118922 | KLF12       | -2,70    | 0,45        |
| ENSG00000196220 | SRGAP3      | -2,70    | 0,62        |
| ENSG00000135974 | C2orf49     | -2,70    | 0,66        |
| ENSG00000185697 | MYBL1       | -2,70    | 0,28        |
| ENSG00000170615 | SLC26A5     | -2,70    | 0,19        |

| ensembl gene    | gene symbol   | Score(d) | Fold Change |
|-----------------|---------------|----------|-------------|
| ENSG00000033627 | ATP6V0A1      | -2,71    | 0,44        |
| ENSG00000068784 | SRBD1         | -2,71    | 0,58        |
| ENSG00000258644 | SYNJ2BP-COX16 | -2,71    | 0,51        |
| ENSG00000134121 | CHL1          | -2,71    | 0,61        |
| ENSG00000090659 | CD209         | -2,71    | 0,55        |
| ENSG00000145087 | STXBP5L       | -2,71    | 0,27        |
| ENSG00000144959 | NCEH1         | -2,71    | 0,63        |
| ENSG00000137074 | APTX          | -2,71    | 0,69        |
| ENSG00000138777 | PPA2          | -2,71    | 0,56        |
| ENSG00000136868 | SLC31A1       | -2,71    | 0,65        |
| ENSG00000196092 | PAX5          | -2,71    | 0,51        |
| ENSG00000134717 | BTF3L4        | -2,72    | 0,63        |
| ENSG00000150907 | FOXO1         | -2,72    | 0,50        |
| ENSG00000188916 | FAM196A       | -2,72    | 0,83        |
| ENSG00000067141 | NEO1          | -2,72    | 0,56        |
| ENSG00000140416 | TPM1          | -2,72    | 0,51        |
| ENSG00000134007 | ADAM20        | -2,72    | 0,65        |
| ENSG00000113300 | CNOT6         | -2,72    | 0,69        |
| ENSG00000011600 | TYROBP        | -2,72    | 0,54        |
| ENSG00000108846 | ABCC3         | -2,72    | 0,67        |
| ENSG00000197233 | OR1J2         | -2,73    | 0,59        |
| ENSG00000099797 | TECR          | -2,73    | 0,64        |
| ENSG00000197385 | ZNF860        | -2,73    | 0,38        |
| ENSG00000103365 | GGA2          | -2,73    | 0,56        |
| ENSG00000181481 | RNF135        | -2,73    | 0,64        |
| ENSG00000127526 | SLC35E1       | -2,73    | 0,68        |
| ENSG00000111254 | AKAP3         | -2,73    | 0,65        |
| ENSG00000172380 | GNG12         | -2,73    | 0,60        |
| ENSG00000108559 | NUP88         | -2,73    | 0,63        |
| ENSG00000185920 | PTCH1         | -2,74    | 0,36        |
| ENSG00000235750 | KIAA0040      | -2,74    | 0,60        |
| ENSG00000138119 | MYOF          | -2,74    | 0,40        |
| ENSG00000185442 | FAM174B       | -2,74    | 0,50        |
| ENSG00000100711 | ZFYVE21       | -2,74    | 0,59        |
| ENSG00000095059 | DHPS          | -2,74    | 0,58        |
| ENSG00000111537 | IFNG          | -2,74    | 0,50        |
| ENSG00000111642 | CHD4          | -2,74    | 0,77        |
| ENSG00000132199 | ENOSF1        | -2,74    | 0,55        |
| ENSG00000109743 | BST1          | -2,74    | 0,57        |
| ENSG00000112394 | SLC16A10      | -2,74    | 0,59        |
| ENSG00000158869 | FCER1G        | -2,74    | 0,38        |
| ENSG00000182255 | KCNA4         | -2,74    | 0,59        |
| ENSG00000106686 | SPATA6L       | -2,75    | 0,56        |
| ENSG00000149418 | ST14          | -2,75    | 0,31        |
| ENSG00000169908 | TM4SF1        | -2,75    | 0,50        |
| ENSG00000049618 | ARID1B        | -2,75    | 0,66        |
| ENSG00000073849 | ST6GAL1       | -2,75    | 0,53        |
| ENSG00000143258 | USP21         | -2,75    | 0,65        |
| ENSG00000170545 | SMAGP         | -2,75    | 0,50        |

| ensembl gene    | gene symbol | Score(d) | Fold Change |
|-----------------|-------------|----------|-------------|
| ENSG00000149292 | TTC12       | -2,75    | 0,61        |
| ENSG00000138606 | SHF         | -2,75    | 0,58        |
| ENSG00000185015 | CA13        | -2,75    | 0,49        |
| ENSG00000198520 | C1orf228    | -2,75    | 0,55        |
| ENSG00000163626 | COX18       | -2,76    | 0,62        |
| ENSG00000143442 | POGZ        | -2,76    | 0,66        |
| ENSG00000117394 | SLC2A1      | -2,76    | 0,57        |
| ENSG00000242616 | GNG10       | -2,76    | 0,48        |
| ENSG00000100632 | ERH         | -2,76    | 0,53        |
| ENSG00000185101 | ANO9        | -2,76    | 0,58        |
| ENSG00000121897 | LIAS        | -2,76    | 0,63        |
| ENSG00000004468 | CD38        | -2,77    | 0,68        |
| ENSG00000167468 | GPX4        | -2,77    | 0,64        |
| ENSG00000142599 | RERE        | -2,77    | 0,49        |
| ENSG00000141759 | TXNL4A      | -2,77    | 0,63        |
| ENSG00000215251 | FASTKD5     | -2,77    | 0,62        |
| ENSG00000205593 | DENND6B     | -2,77    | 0,43        |
| ENSG00000136709 | WDR33       | -2,78    | 0,64        |
| ENSG00000196998 | WDR45       | -2,78    | 0,69        |
| ENSG00000116285 | ERRFI1      | -2,78    | 0,44        |
| ENSG00000139971 | C14orf37    | -2,78    | 0,58        |
| ENSG00000174175 | SELP        | -2,78    | 0,49        |
| ENSG00000187210 | GCNT1       | -2,78    | 0,55        |
| ENSG00000139133 | ALG10       | -2,78    | 0,59        |
| ENSG00000134375 | TIMM17A     | -2,78    | 0,54        |
| ENSG00000130787 | HIP1R       | -2,79    | 0,69        |
| ENSG00000115275 | MOGS        | -2,79    | 0,66        |
| ENSG00000180979 | LRRC57      | -2,79    | 0,64        |
| ENSG00000055118 | KCNH2       | -2,79    | 0,48        |
| ENSG00000181817 | LSM10       | -2,79    | 0,62        |
| ENSG00000169403 | PTAFR       | -2,79    | 0,64        |
| ENSG00000127720 | METTL25     | -2,79    | 0,59        |
| ENSG00000105662 | CRTC1       | -2,79    | 0,65        |
| ENSG00000138722 | MMRN1       | -2,80    | 0,41        |
| ENSG00000104093 | DMXL2       | -2,80    | 0,46        |
| ENSG00000095397 | WHRN        | -2,80    | 0,40        |
| ENSG00000163171 | CDC42EP3    | -2,80    | 0,41        |
| ENSG00000170271 | FAXDC2      | -2,80    | 0,51        |
| ENSG00000164040 | PGRMC2      | -2,80    | 0,67        |
| ENSG00000166833 | NAV2        | -2,80    | 0,43        |
| ENSG00000135338 | LCA5        | -2,81    | 0,39        |
| ENSG00000162777 | DENND2D     | -2,81    | 0,59        |
| ENSG00000154144 | TBRG1       | -2,81    | 0,54        |
| ENSG00000158604 | TMED4       | -2,81    | 0,55        |
| ENSG00000105698 | USF2        | -2,81    | 0,71        |
| ENSG00000143479 | DYRK3       | -2,82    | 0,59        |
| ENSG00000128563 | PRKRIP1     | -2,82    | 0,68        |
| ENSG00000165338 | HECTD2      | -2,82    | 0,44        |
| ENSG00000178057 | NDUFAF3     | -2,82    | 0,61        |

| ensembl gene    | gene symbol | Score(d) | Fold Change |
|-----------------|-------------|----------|-------------|
| ENSG00000113811 | SELK        | -2,82    | 0,61        |
| ENSG00000172590 | MRPL52      | -2,83    | 0,65        |
| ENSG00000117533 | VAMP4       | -2,83    | 0,57        |
| ENSG00000127364 | TAS2R4      | -2,83    | 0,68        |
| ENSG00000137944 | KYAT3       | -2,83    | 0,63        |
| ENSG00000172927 | MYEOV       | -2,83    | 0,30        |
| ENSG00000197136 | PCNX3       | -2,83    | 0,73        |
| ENSG00000223865 | HLA-DPB1    | -2,83    | 0,50        |
| ENSG00000170962 | PDGFD       | -2,83    | 0,53        |
| ENSG00000140396 | NCOA2       | -2,83    | 0,57        |
| ENSG00000119929 | CUTC        | -2,83    | 0,78        |
| ENSG00000203737 | GPR52       | -2,83    | 0,48        |
| ENSG00000267508 | ZNF285      | -2,83    | 0,68        |
| ENSG00000111554 | MDM1        | -2,84    | 0,48        |
| ENSG00000185477 | GPRIN3      | -2,84    | 0,26        |
| ENSG00000124491 | F13A1       | -2,84    | 0,33        |
| ENSG00000136161 | RCBTB2      | -2,84    | 0,49        |
| ENSG00000123352 | SPATS2      | -2,84    | 0,67        |
| ENSG00000149636 | DSN1        | -2,84    | 0,65        |
| ENSG00000124733 | MEA1        | -2,84    | 0,58        |
| ENSG00000160345 | C9orf116    | -2,84    | 0,44        |
| ENSG00000129625 | REEP5       | -2,84    | 0,76        |
| ENSG00000143013 | LMO4        | -2,85    | 0,63        |
| ENSG00000164920 | OSR2        | -2,85    | 0,60        |
| ENSG00000182185 | RAD51B      | -2,85    | 0,50        |
| ENSG00000104691 | UBXN8       | -2,86    | 0,49        |
| ENSG00000108312 | UBTF        | -2,86    | 0,58        |
| ENSG00000187676 | B3GLCT      | -2,86    | 0,47        |
| ENSG00000122786 | CALD1       | -2,86    | 0,51        |
| ENSG00000129472 | RAB2B       | -2,87    | 0,65        |
| ENSG00000187266 | EPOR        | -2,87    | 0,60        |
| ENSG00000005381 | MPO         | -2,87    | 0,22        |
| ENSG00000128881 | TTBK2       | -2,87    | 0,69        |
| ENSG00000130749 | ZC3H4       | -2,87    | 0,52        |
| ENSG00000133704 | IPO8        | -2,87    | 0,47        |
| ENSG00000135048 | TMEM2       | -2,87    | 0,29        |
| ENSG00000135144 | DTX1        | -2,88    | 0,38        |
| ENSG00000041353 | RAB27B      | -2,88    | 0,64        |
| ENSG00000186951 | PPARA       | -2,88    | 0,64        |
| ENSG00000169814 | BTD         | -2,88    | 0,64        |
| ENSG00000153250 | RBMS1       | -2,88    | 0,52        |
| ENSG00000116584 | ARHGEF2     | -2,88    | 0,39        |
| ENSG00000161921 | CXCL16      | -2,88    | 0,38        |
| ENSG00000114544 | SLC41A3     | -2,88    | 0,67        |
| ENSG00000128567 | PODXL       | -2,88    | 0,73        |
| ENSG00000160551 | TAOK1       | -2,88    | 0,66        |
| ENSG00000186812 | ZNF397      | -2,88    | 0,50        |
| ENSG00000276234 | TADA2A      | -2,88    | 0,51        |
| ENSG00000141956 | PRDM15      | -2,88    | 0,31        |

| ensembl gene    | gene symbol   | Score(d) | Fold Change |
|-----------------|---------------|----------|-------------|
| ENSG00000131094 | C1QL1         | -2,88    | 0,57        |
| ENSG00000124181 | PLCG1         | -2,89    | 0,73        |
| ENSG00000130818 | ZNF426        | -2,89    | 0,47        |
| ENSG00000078140 | UBE2K         | -2,89    | 0,65        |
| ENSG00000197249 | SERPINA1      | -2,89    | 0,47        |
| ENSG00000177628 | GBA           | -2,89    | 0,55        |
| ENSG00000250719 | RP11-322N21.2 | -2,89    | 0,65        |
| ENSG00000124772 | CPNE5         | -2,89    | 0,43        |
| ENSG00000179397 | C1orf101      | -2,89    | 0,62        |
| ENSG00000144021 | CIAO1         | -2,89    | 0,71        |
| ENSG00000165215 | CLDN3         | -2,89    | 0,73        |
| ENSG00000100321 | SYNGR1        | -2,90    | 0,41        |
| ENSG00000108691 | CCL2          | -2,90    | 0,19        |
| ENSG00000269028 | MTRNR2L12     | -2,90    | 0,38        |
| ENSG00000021776 | AQR           | -2,90    | 0,65        |
| ENSG00000143458 | GABPB2        | -2,90    | 0,50        |
| ENSG00000183778 | B3GALT5       | -2,90    | 0,61        |
| ENSG00000181555 | SETD2         | -2,90    | 0,62        |
| ENSG00000137642 | SORL1         | -2,90    | 0,31        |
| ENSG00000114487 | MORC1         | -2,91    | 0,36        |
| ENSG00000060237 | WNK1          | -2,91    | 0,51        |
| ENSG00000168038 | ULK4          | -2,91    | 0,51        |
| ENSG00000163539 | CLASP2        | -2,91    | 0,62        |
| ENSG00000126561 | STAT5A        | -2,91    | 0,39        |
| ENSG00000153815 | CMIP          | -2,91    | 0,49        |
| ENSG00000089006 | SNX5          | -2,91    | 0,69        |
| ENSG00000100445 | SDR39U1       | -2,91    | 0,70        |
| ENSG00000185219 | ZNF445        | -2,91    | 0,62        |
| ENSG00000224877 | C17orf89      | -2,92    | 0,69        |
| ENSG00000118113 | MMP8          | -2,92    | 0,14        |
| ENSG00000129245 | FXR2          | -2,92    | 0,49        |
| ENSG00000179979 | CRIPAK        | -2,92    | 0,60        |
| ENSG00000006740 | ARHGAP44      | -2,92    | 0,29        |
| ENSG00000118518 | RNF146        | -2,92    | 0,66        |
| ENSG00000153339 | TRAPPC8       | -2,92    | 0,44        |
| ENSG00000122783 | C7orf49       | -2,92    | 0,68        |
| ENSG00000088970 | KIZ           | -2,92    | 0,62        |
| ENSG00000147144 | CCDC120       | -2,92    | 0,51        |
| ENSG00000096006 | CRISP3        | -2,92    | 0,25        |
| ENSG00000154639 | CXADR         | -2,92    | 0,36        |
| ENSG00000182504 | CEP97         | -2,93    | 0,45        |
| ENSG00000116539 | ASH1L         | -2,93    | 0,51        |
| ENSG00000171757 | LRRC34        | -2,93    | 0,45        |
| ENSG00000106066 | CPVL          | -2,93    | 0,21        |
| ENSG00000118690 | ARMC2         | -2,93    | 0,25        |
| ENSG00000175470 | PPP2R2D       | -2,93    | 0,67        |
| ENSG00000139974 | SLC38A6       | -2,93    | 0,44        |
| ENSG00000174206 | C12orf66      | -2,93    | 0,71        |
| ENSG00000196562 | SULF2         | -2,94    | 0,27        |

| ensembl gene    | gene symbol | Score(d) | Fold Change |
|-----------------|-------------|----------|-------------|
| ENSG00000129911 | KLF16       | -2,94    | 0,59        |
| ENSG00000189241 | TSPYL1      | -2,95    | 0,71        |
| ENSG00000196405 | EVL         | -2,95    | 0,51        |
| ENSG00000160991 | ORAI2       | -2,95    | 0,66        |
| ENSG00000147316 | MCPH1       | -2,95    | 0,66        |
| ENSG00000177732 | SOX12       | -2,95    | 0,74        |
| ENSG00000104774 | MAN2B1      | -2,95    | 0,58        |
| ENSG00000204060 | FOXO6       | -2,95    | 0,68        |
| ENSG00000242114 | MTFP1       | -2,95    | 0,55        |
| ENSG00000151746 | BICD1       | -2,95    | 0,53        |
| ENSG00000101384 | JAG1        | -2,96    | 0,42        |
| ENSG00000111679 | PTPN6       | -2,96    | 0,47        |
| ENSG00000146021 | KLHL3       | -2,96    | 0,53        |
| ENSG00000184905 | TCEAL2      | -2,96    | 0,69        |
| ENSG00000125952 | MAX         | -2,96    | 0,68        |
| ENSG00000163932 | PRKCD       | -2,96    | 0,56        |
| ENSG00000147408 | CSGALNACT1  | -2,96    | 0,37        |
| ENSG00000138670 | RASGEF1B    | -2,96    | 0,71        |
| ENSG00000148290 | SURF1       | -2,97    | 0,63        |
| ENSG00000145781 | COMMD10     | -2,97    | 0,65        |
| ENSG00000167165 | UGT1A6      | -2,97    | 0,62        |
| ENSG00000102710 | SUPT20H     | -2,97    | 0,57        |
| ENSG00000090316 | MAEA        | -2,97    | 0,73        |
| ENSG00000170525 | PFKFB3      | -2,97    | 0,36        |
| ENSG00000049323 | LTBP1       | -2,97    | 0,36        |
| ENSG00000173120 | KDM2A       | -2,97    | 0,59        |
| ENSG00000118579 | MED28       | -2,98    | 0,62        |
| ENSG00000157554 | ERG         | -2,98    | 0,72        |
| ENSG00000060749 | QSER1       | -2,98    | 0,71        |
| ENSG00000145335 | SNCA        | -2,98    | 0,51        |
| ENSG00000104880 | ARHGEF18    | -2,98    | 0,36        |
| ENSG00000074201 | CLNS1A      | -2,99    | 0,46        |
| ENSG00000079215 | SLC1A3      | -2,99    | 0,63        |
| ENSG00000116005 | PCYOX1      | -2,99    | 0,46        |
| ENSG00000124557 | BTN1A1      | -2,99    | 0,38        |
| ENSG00000168283 | BMI1        | -2,99    | 0,51        |
| ENSG00000206530 | CFAP44      | -2,99    | 0,19        |
| ENSG00000178568 | ERBB4       | -2,99    | 0,26        |
| ENSG00000132953 | XPO4        | -2,99    | 0,60        |
| ENSG00000119685 | TTLL5       | -3,00    | 0,61        |
| ENSG00000163645 | ERICH6      | -3,00    | 0,73        |
| ENSG00000243927 | MRPS6       | -3,00    | 0,60        |
| ENSG00000164002 | EXO5        | -3,00    | 0,57        |
| ENSG00000169499 | PLEKHA2     | -3,00    | 0,54        |
| ENSG00000173369 | C1QB        | -3,00    | 0,34        |
| ENSG00000163348 | PYGO2       | -3,00    | 0,28        |
| ENSG00000152904 | GGPS1       | -3,00    | 0,61        |
| ENSG00000148737 | TCF7L2      | -3,01    | 0,43        |
| ENSG00000158161 | EYA3        | -3,01    | 0,55        |



| ensembl gene     | gene symbol | Score(d) | Fold Change |
|------------------|-------------|----------|-------------|
| ENSG00000185591  | SP1         | -3,01    | 0,56        |
| ENSG00000136193  | SCRN1       | -3,01    | 0,48        |
| ENSG00000142507  | PSMB6       | -3,01    | 0,50        |
| ENSG00000241233  | KRTAP5-8    | -3,01    | 0,69        |
| ENSG00000198270  | TMEM116     | -3,02    | 0,56        |
| ENSG00000160856  | FCRL3       | -3,02    | 0,36        |
| ENSG00000164603  | BMT2        | -3,02    | 0,53        |
| ENSG00000127507  | ADGRE2      | -3,02    | 0,52        |
| ENSG00000106609  | TMEM248     | -3,03    | 0,74        |
| ENSG00000141556  | TBCD        | -3,03    | 0,56        |
| ENSG00000116574  | RHOU        | -3,03    | 0,63        |
| ENSG00000174851  | YIF1A       | -3,03    | 0,51        |
| ENSG00000137845  | ADAM10      | -3,04    | 0,55        |
| ENSG00000119042  | SATB2       | -3,04    | 0,52        |
| ENSG00000182578  | CSF1R       | -3,04    | 0,52        |
| ENSG00000114446  | IFT57       | -3,04    | 0,60        |
| ENSG00000102471  | NDFIP2      | -3,04    | 0,34        |
| ENSG00000175471  | MCTP1       | -3,04    | 0,54        |
| ENSG00000120833  | SOCS2       | -3,04    | 0,57        |
| ENSG00000152582  | SPEF2       | -3,04    | 0,55        |
| ENSG00000156642  | NPTN        | -3,05    | 0,53        |
| ENSG00000144560  | VGLL4       | -3,05    | 0,51        |
| ENSG00000109208  | SMR3A       | -3,05    | 0,65        |
| ENSG00000141441  | GAREM1      | -3,05    | 0,22        |
| ENSG00000173209  | AHSA2       | -3,05    | 0,67        |
| ENSG00000198105  | ZNF248      | -3,05    | 0,51        |
| ENSG00000186088  | GSAP        | -3,06    | 0,64        |
| ENSG00000124767  | GLO1        | -3,06    | 0,68        |
| ENSG00000100307  | CBX7        | -3,06    | 0,39        |
| ENSG00000104341  | LAPTM4B     | -3,06    | 0,16        |
| ENSG00000000419  | DPM1        | -3,07    | 0,53        |
| ENSG00000143603  | KCNN3       | -3,07    | 0,43        |
| ENSG00000271605  | MILR1       | -3,07    | 0,29        |
| ENSG000000005020 | SKAP2       | -3,07    | 0,34        |
| ENSG00000185565  | LSAMP       | -3,07    | 0,18        |
| ENSG00000127415  | IDUA        | -3,07    | 0,65        |
| ENSG00000181027  | FKRP        | -3,07    | 0,62        |
| ENSG00000168916  | ZNF608      | -3,07    | 0,30        |
| ENSG00000106344  | RBM28       | -3,08    | 0,51        |
| ENSG00000136643  | RPS6KC1     | -3,09    | 0,45        |
| ENSG00000178252  | WDR6        | -3,09    | 0,50        |
| ENSG00000075568  | TMEM131     | -3,10    | 0,58        |
| ENSG00000128594  | LRRC4       | -3,10    | 0,69        |
| ENSG00000113068  | PFDN1       | -3,10    | 0,43        |
| ENSG00000170296  | GABARAP     | -3,10    | 0,69        |
| ENSG00000104824  | HNRNPPL     | -3,10    | 0,57        |
| ENSG00000169213  | RAB3B       | -3,10    | 0,33        |
| ENSG00000254999  | BRK1        | -3,10    | 0,53        |
| ENSG00000143315  | PIGM        | -3,10    | 0,50        |

| ensembl gene    | gene symbol | Score(d) | Fold Change |
|-----------------|-------------|----------|-------------|
| ENSG00000065970 | FOXJ2       | -3,10    | 0,60        |
| ENSG00000133678 | TMEM254     | -3,10    | 0,55        |
| ENSG00000168081 | PNOC        | -3,11    | 0,47        |
| ENSG00000183291 | SELENOF     | -3,11    | 0,71        |
| ENSG00000221916 | C19orf73    | -3,11    | 0,56        |
| ENSG00000149084 | HSD17B12    | -3,11    | 0,65        |
| ENSG00000145246 | ATP10D      | -3,11    | 0,47        |
| ENSG00000185989 | RASA3       | -3,11    | 0,44        |
| ENSG00000059145 | UNKL        | -3,12    | 0,73        |
| ENSG00000159063 | ALG8        | -3,12    | 0,54        |
| ENSG00000170949 | ZNF160      | -3,13    | 0,66        |
| ENSG00000173875 | ZNF791      | -3,13    | 0,66        |
| ENSG00000163527 | STT3B       | -3,13    | 0,65        |
| ENSG00000274641 | HIST1H2BO   | -3,13    | 0,37        |
| ENSG00000171634 | BPTF        | -3,13    | 0,60        |
| ENSG00000196781 | TLE1        | -3,13    | 0,25        |
| ENSG00000181408 | UTS2R       | -3,13    | 0,49        |
| ENSG00000168056 | LTBP3       | -3,13    | 0,54        |
| ENSG00000115607 | IL18RAP     | -3,13    | 0,39        |
| ENSG00000101224 | CDC25B      | -3,14    | 0,53        |
| ENSG00000154760 | SLFN13      | -3,14    | 0,40        |
| ENSG00000114423 | CBLB        | -3,14    | 0,51        |
| ENSG00000011295 | TTC19       | -3,14    | 0,52        |
| ENSG00000110077 | MS4A6A      | -3,14    | 0,29        |
| ENSG00000197776 | KLHDC1      | -3,15    | 0,38        |
| ENSG00000123358 | NR4A1       | -3,15    | 0,37        |
| ENSG00000137486 | ARRB1       | -3,15    | 0,42        |
| ENSG00000125753 | VASP        | -3,16    | 0,56        |
| ENSG00000184363 | PKP3        | -3,16    | 0,66        |
| ENSG00000132535 | DLG4        | -3,16    | 0,31        |
| ENSG00000213593 | TMX2        | -3,16    | 0,50        |
| ENSG00000104957 | CCDC130     | -3,17    | 0,63        |
| ENSG00000223501 | VPS52       | -3,17    | 0,62        |
| ENSG00000148057 | IDNK        | -3,17    | 0,59        |
| ENSG00000226761 | TAS2R46     | -3,18    | 0,33        |
| ENSG00000164889 | SLC4A2      | -3,18    | 0,58        |
| ENSG00000176261 | ZBTB8OS     | -3,18    | 0,48        |
| ENSG00000073754 | CD5L        | -3,19    | 0,47        |
| ENSG00000120675 | DNAJC15     | -3,19    | 0,51        |
| ENSG00000262180 | OCLM        | -3,19    | 0,59        |
| ENSG00000170166 | HOXD4       | -3,19    | 0,64        |
| ENSG00000183401 | CCDC159     | -3,19    | 0,49        |
| ENSG00000166341 | DCHS1       | -3,19    | 0,74        |
| ENSG00000174574 | AKIRIN1     | -3,20    | 0,69        |
| ENSG00000071655 | MBD3        | -3,20    | 0,55        |
| ENSG00000104529 | EEF1D       | -3,20    | 0,70        |
| ENSG00000131196 | NFATC1      | -3,20    | 0,49        |
| ENSG00000140525 | FANCI       | -3,20    | 0,56        |
| ENSG00000154309 | DISP1       | -3,20    | 0,50        |

| ensembl gene    | gene symbol | Score(d) | Fold Change |
|-----------------|-------------|----------|-------------|
| ENSG00000175106 | TVP23C      | -3,20    | 0,48        |
| ENSG00000170571 | EMB         | -3,21    | 0,68        |
| ENSG00000111328 | CDK2AP1     | -3,21    | 0,42        |
| ENSG00000146701 | MDH2        | -3,21    | 0,59        |
| ENSG00000155903 | RASA2       | -3,21    | 0,51        |
| ENSG00000070087 | PFN2        | -3,21    | 0,37        |
| ENSG00000158473 | CD1D        | -3,22    | 0,30        |
| ENSG00000198146 | ZNF770      | -3,22    | 0,57        |
| ENSG00000104671 | DCTN6       | -3,22    | 0,69        |
| ENSG00000160255 | ITGB2       | -3,22    | 0,53        |
| ENSG00000099326 | MZF1        | -3,22    | 0,62        |
| ENSG00000012061 | ERCC1       | -3,22    | 0,63        |
| ENSG00000124588 | NQO2        | -3,23    | 0,57        |
| ENSG00000213024 | NUP62       | -3,23    | 0,38        |
| ENSG00000163221 | S100A12     | -3,23    | 0,14        |
| ENSG00000146963 | LUC7L2      | -3,23    | 0,64        |
| ENSG00000250722 | SEPP1       | -3,23    | 0,35        |
| ENSG00000140749 | IGSF6       | -3,23    | 0,35        |
| ENSG00000185344 | ATP6V0A2    | -3,23    | 0,73        |
| ENSG00000166068 | SPRED1      | -3,23    | 0,22        |
| ENSG00000157014 | TATDN2      | -3,23    | 0,42        |
| ENSG00000101290 | CDS2        | -3,23    | 0,44        |
| ENSG00000110079 | MS4A4A      | -3,23    | 0,33        |
| ENSG00000135824 | RGS8        | -3,23    | 0,64        |
| ENSG00000088387 | DOCK9       | -3,24    | 0,48        |
| ENSG00000180386 | KRTAP9-7    | -3,24    | 0,69        |
| ENSG00000122417 | ODF2L       | -3,24    | 0,45        |
| ENSG00000091879 | ANGPT2      | -3,25    | 0,76        |
| ENSG00000118363 | SPCS2       | -3,25    | 0,28        |
| ENSG00000114529 | C3orf52     | -3,25    | 0,50        |
| ENSG00000165140 | FBP1        | -3,25    | 0,22        |
| ENSG00000175634 | RPS6KB2     | -3,25    | 0,55        |
| ENSG00000125818 | PSMF1       | -3,25    | 0,73        |
| ENSG00000111325 | OGFOD2      | -3,26    | 0,58        |
| ENSG00000139289 | PHLDA1      | -3,26    | 0,26        |
| ENSG00000187116 | LILRA5      | -3,27    | 0,56        |
| ENSG00000137494 | ANKRD42     | -3,27    | 0,46        |
| ENSG00000176142 | TMEM39A     | -3,27    | 0,71        |
| ENSG00000171552 | BCL2L1      | -3,27    | 0,59        |
| ENSG00000160007 | ARHGAP35    | -3,28    | 0,64        |
| ENSG00000171766 | GATM        | -3,28    | 0,22        |
| ENSG00000197734 | C14orf178   | -3,28    | 0,77        |
| ENSG00000073605 | GSDMB       | -3,28    | 0,49        |
| ENSG00000112893 | MAN2A1      | -3,28    | 0,42        |
| ENSG00000204420 | C6orf25     | -3,28    | 0,64        |
| ENSG00000153071 | DAB2        | -3,29    | 0,33        |
| ENSG00000184831 | APOO        | -3,29    | 0,32        |
| ENSG00000172366 | MCRIP2      | -3,29    | 0,42        |
| ENSG00000243789 | JMJD7       | -3,30    | 0,47        |

| ensembl gene    | gene symbol | Score(d) | Fold Change |
|-----------------|-------------|----------|-------------|
| ENSG00000198799 | LRIG2       | -3,30    | 0,63        |
| ENSG00000159958 | TNFRSF13C   | -3,30    | 0,32        |
| ENSG00000072134 | EPN2        | -3,30    | 0,53        |
| ENSG00000172663 | TMEM134     | -3,31    | 0,70        |
| ENSG00000198088 | NUP62CL     | -3,31    | 0,47        |
| ENSG00000213020 | ZNF611      | -3,31    | 0,47        |
| ENSG00000198081 | ZBTB14      | -3,32    | 0,51        |
| ENSG00000181722 | ZBTB20      | -3,32    | 0,53        |
| ENSG00000196712 | NF1         | -3,32    | 0,51        |
| ENSG00000115756 | HPCAL1      | -3,32    | 0,64        |
| ENSG00000106723 | SPIN1       | -3,33    | 0,48        |
| ENSG00000196236 | XPNPEP3     | -3,33    | 0,61        |
| ENSG00000126461 | SCAF1       | -3,33    | 0,72        |
| ENSG00000105723 | GSK3A       | -3,33    | 0,75        |
| ENSG00000168491 | CCDC110     | -3,34    | 0,34        |
| ENSG00000075651 | PLD1        | -3,34    | 0,51        |
| ENSG00000173166 | RAPH1       | -3,34    | 0,18        |
| ENSG00000109079 | TNFAIP1     | -3,35    | 0,64        |
| ENSG00000149177 | PTPRJ       | -3,35    | 0,28        |
| ENSG00000103018 | CYB5B       | -3,35    | 0,42        |
| ENSG00000125703 | ATG4C       | -3,35    | 0,43        |
| ENSG00000129538 | RNASE1      | -3,35    | 0,27        |
| ENSG00000140022 | STON2       | -3,35    | 0,38        |
| ENSG00000154146 | NRGN        | -3,36    | 0,58        |
| ENSG00000139687 | RB1         | -3,36    | 0,39        |
| ENSG00000126464 | PRR12       | -3,36    | 0,66        |
| ENSG00000073756 | PTGS2       | -3,36    | 0,27        |
| ENSG00000100320 | RBFOX2      | -3,37    | 0,45        |
| ENSG00000138336 | TET1        | -3,38    | 0,37        |
| ENSG00000219626 | FAM228B     | -3,38    | 0,58        |
| ENSG00000116729 | WLS         | -3,38    | 0,44        |
| ENSG00000068971 | PPP2R5B     | -3,38    | 0,62        |
| ENSG00000130234 | ACE2        | -3,38    | 0,59        |
| ENSG00000198837 | DENND4B     | -3,38    | 0,57        |
| ENSG00000178229 | ZNF543      | -3,38    | 0,59        |
| ENSG00000204424 | LY6G6F      | -3,39    | 0,58        |
| ENSG00000160588 | MPZL3       | -3,40    | 0,43        |
| ENSG00000172716 | SLFN11      | -3,41    | 0,27        |
| ENSG00000130723 | PRRC2B      | -3,41    | 0,74        |
| ENSG00000205497 | OR51A4      | -3,42    | 0,52        |
| ENSG00000149516 | MS4A3       | -3,42    | 0,21        |
| ENSG00000116668 | SWT1        | -3,43    | 0,48        |
| ENSG00000120333 | MRPS14      | -3,46    | 0,36        |
| ENSG00000111906 | HDDC2       | -3,46    | 0,56        |
| ENSG00000279342 | AP000866.1  | -3,46    | 0,37        |
| ENSG00000212128 | TAS2R13     | -3,46    | 0,42        |
| ENSG00000178115 | GOLGA8Q     | -3,47    | 0,36        |
| ENSG00000101162 | TUBB1       | -3,48    | 0,41        |
| ENSG00000063854 | HAGH        | -3,48    | 0,43        |

| ensembl gene    | gene symbol         | Score(d) | Fold Change |
|-----------------|---------------------|----------|-------------|
| ENSG00000172775 | FAM192A             | -3,48    | 0,61        |
| ENSG00000105538 | RASIP1              | -3,49    | 0,75        |
| ENSG00000166145 | SPINT1              | -3,49    | 0,39        |
| ENSG00000100564 | PIGH                | -3,49    | 0,65        |
| ENSG00000133983 | COX16               | -3,49    | 0,58        |
| ENSG00000212126 | TAS2R50             | -3,50    | 0,37        |
| ENSG00000204977 | TRIM13              | -3,51    | 0,43        |
| ENSG00000153936 | HS2ST1              | -3,51    | 0,47        |
| ENSG00000132003 | ZSWIM4              | -3,52    | 0,57        |
| ENSG00000095303 | PTGS1               | -3,52    | 0,52        |
| ENSG00000165028 | NIPSNAP3B           | -3,52    | 0,33        |
| ENSG00000211584 | SLC48A1             | -3,52    | 0,59        |
| ENSG00000181631 | P2RY13              | -3,52    | 0,39        |
| ENSG00000283199 | ABC13-47488600E17.1 | -3,52    | 0,55        |
| ENSG00000168298 | HIST1H1E            | -3,53    | 0,50        |
| ENSG00000136869 | TLR4                | -3,53    | 0,49        |
| ENSG00000107669 | ATE1                | -3,53    | 0,66        |
| ENSG00000198879 | SFMBT2              | -3,54    | 0,45        |
| ENSG0000018280  | SLC11A1             | -3,54    | 0,46        |
| ENSG00000079931 | MOXD1               | -3,54    | 0,20        |
| ENSG00000177463 | NR2C2               | -3,55    | 0,56        |
| ENSG00000156858 | PRR14               | -3,55    | 0,56        |
| ENSG00000181381 | DDX60L              | -3,55    | 0,46        |
| ENSG00000069966 | GNB5                | -3,56    | 0,41        |
| ENSG00000149131 | SERPING1            | -3,57    | 0,31        |
| ENSG00000122592 | HOXA7               | -3,57    | 0,68        |
| ENSG00000139174 | PRICKLE1            | -3,57    | 0,41        |
| ENSG00000138639 | ARHGAP24            | -3,58    | 0,34        |
| ENSG00000157869 | RAB28               | -3,58    | 0,55        |
| ENSG00000124177 | CHD6                | -3,58    | 0,48        |
| ENSG00000179833 | SERTAD2             | -3,59    | 0,36        |
| ENSG00000111707 | SUDS3               | -3,59    | 0,62        |
| ENSG00000108557 | RAI1                | -3,60    | 0,66        |
| ENSG00000117020 | AKT3                | -3,61    | 0,21        |
| ENSG00000128272 | ATF4                | -3,61    | 0,72        |
| ENSG00000157379 | DHRS1               | -3,61    | 0,52        |
| ENSG00000134243 | SORT1               | -3,62    | 0,24        |
| ENSG00000114125 | RNF7                | -3,62    | 0,33        |
| ENSG00000244734 | HBB                 | -3,62    | 0,14        |
| ENSG00000233822 | HIST1H2BN           | -3,62    | 0,53        |
| ENSG00000168389 | MFSD2A              | -3,63    | 0,35        |
| ENSG00000204482 | LST1                | -3,63    | 0,47        |
| ENSG00000198369 | SPRED2              | -3,63    | 0,44        |
| ENSG00000185267 | CDNF                | -3,63    | 0,55        |
| ENSG00000169385 | RNASE2              | -3,63    | 0,15        |
| ENSG00000154237 | LRRK1               | -3,64    | 0,32        |
| ENSG00000149547 | EI24                | -3,65    | 0,47        |
| ENSG00000166405 | RIC3                | -3,65    | 0,44        |
| ENSG00000111269 | CREBL2              | -3,66    | 0,50        |

| ensembl gene    | gene symbol | Score(d) | Fold Change |
|-----------------|-------------|----------|-------------|
| ENSG00000212124 | TAS2R19     | -3,66    | 0,28        |
| ENSG00000105352 | CEACAM4     | -3,67    | 0,58        |
| ENSG00000144711 | IQSEC1      | -3,67    | 0,47        |
| ENSG00000139193 | CD27        | -3,69    | 0,08        |
| ENSG00000158773 | USF1        | -3,69    | 0,51        |
| ENSG00000155749 | ALS2CR12    | -3,69    | 0,45        |
| ENSG00000196911 | KPNA5       | -3,70    | 0,60        |
| ENSG00000169696 | ASPSCR1     | -3,70    | 0,61        |
| ENSG00000078699 | CBFA2T2     | -3,70    | 0,46        |
| ENSG00000167766 | ZNF83       | -3,71    | 0,28        |
| ENSG00000173376 | NDNF        | -3,71    | 0,20        |
| ENSG00000205659 | LIN52       | -3,72    | 0,53        |
| ENSG00000231389 | HLA-DPA1    | -3,72    | 0,31        |
| ENSG00000136144 | RCBTB1      | -3,72    | 0,48        |
| ENSG00000136104 | RNASEH2B    | -3,73    | 0,51        |
| ENSG00000111271 | ACAD10      | -3,73    | 0,49        |
| ENSG00000146674 | IGFBP3      | -3,74    | 0,52        |
| ENSG00000108840 | HDAC5       | -3,74    | 0,55        |
| ENSG00000021461 | CYP3A43     | -3,74    | 0,37        |
| ENSG00000172765 | TMCC1       | -3,74    | 0,62        |
| ENSG00000133800 | LYVE1       | -3,75    | 0,22        |
| ENSG00000169397 | RNASE3      | -3,76    | 0,11        |
| ENSG00000160094 | ZNF362      | -3,76    | 0,66        |
| ENSG00000186815 | TPCN1       | -3,76    | 0,37        |
| ENSG00000132704 | FCRL2       | -3,76    | 0,21        |
| ENSG00000072121 | ZFYVE26     | -3,76    | 0,65        |
| ENSG00000160213 | CSTB        | -3,77    | 0,59        |
| ENSG00000064115 | TM7SF3      | -3,77    | 0,40        |
| ENSG00000153291 | SLC25A27    | -3,78    | 0,15        |
| ENSG00000119616 | FCF1        | -3,79    | 0,63        |
| ENSG00000107185 | RGP1        | -3,79    | 0,70        |
| ENSG00000137513 | NARS2       | -3,79    | 0,50        |
| ENSG00000119638 | NEK9        | -3,79    | 0,56        |
| ENSG00000057935 | MTA3        | -3,81    | 0,49        |
| ENSG00000177666 | PNPLA2      | -3,81    | 0,52        |
| ENSG00000147535 | PLPP5       | -3,82    | 0,67        |
| ENSG00000130702 | LAMA5       | -3,82    | 0,45        |
| ENSG00000091972 | CD200       | -3,82    | 0,20        |
| ENSG00000128218 | VPREB3      | -3,83    | 0,12        |
| ENSG00000254598 | CSNK2A3     | -3,83    | 0,55        |
| ENSG00000135046 | ANXA1       | -3,84    | 0,13        |
| ENSG00000130347 | RTN4IP1     | -3,85    | 0,44        |
| ENSG00000086200 | IPO11       | -3,86    | 0,42        |
| ENSG00000079691 | LRRC16A     | -3,86    | 0,41        |
| ENSG00000135185 | TMEM243     | -3,87    | 0,49        |
| ENSG00000101138 | CSTF1       | -3,88    | 0,63        |
| ENSG00000090382 | LYZ         | -3,89    | 0,26        |
| ENSG00000157429 | ZNF19       | -3,90    | 0,60        |
| ENSG00000241058 | NSUN6       | -3,90    | 0,51        |

| ensembl gene    | gene symbol | Score(d) | Fold Change |
|-----------------|-------------|----------|-------------|
| ENSG00000197054 | ZNF763      | -3,90    | 0,42        |
| ENSG00000113638 | TTC33       | -3,90    | 0,44        |
| ENSG00000110717 | NDUFS8      | -3,91    | 0,44        |
| ENSG00000107249 | GLIS3       | -3,91    | 0,15        |
| ENSG00000082074 | FYB         | -3,91    | 0,32        |
| ENSG00000105771 | SMG9        | -3,91    | 0,61        |
| ENSG00000008226 | DLEC1       | -3,92    | 0,51        |
| ENSG00000198900 | TOP1        | -3,92    | 0,59        |
| ENSG00000198121 | LPAR1       | -3,93    | 0,57        |
| ENSG00000110713 | NUP98       | -3,94    | 0,54        |
| ENSG00000168288 | MMADHC      | -3,95    | 0,40        |
| ENSG00000144791 | LIMD1       | -3,96    | 0,43        |
| ENSG00000076108 | BAZ2A       | -3,96    | 0,51        |
| ENSG00000160209 | PDXK        | -3,96    | 0,51        |
| ENSG00000136715 | SAP130      | -3,97    | 0,46        |
| ENSG00000106603 | COA1        | -3,99    | 0,54        |
| ENSG00000176102 | CSTF3       | -4,00    | 0,49        |
| ENSG00000078747 | ITCH        | -4,01    | 0,78        |
| ENSG00000174282 | ZBTB4       | -4,01    | 0,62        |
| ENSG00000182986 | ZNF320      | -4,01    | 0,41        |
| ENSG00000196227 | FAM217B     | -4,02    | 0,44        |
| ENSG00000171735 | CAMTA1      | -4,02    | 0,64        |
| ENSG00000099250 | NRP1        | -4,02    | 0,18        |
| ENSG00000188732 | FAM221A     | -4,02    | 0,36        |
| ENSG00000241106 | HLA-DOB     | -4,03    | 0,38        |
| ENSG00000121481 | RNF2        | -4,03    | 0,56        |
| ENSG00000154016 | GRAP        | -4,03    | 0,48        |
| ENSG00000214078 | CPNE1       | -4,05    | 0,49        |
| ENSG00000179104 | TMTC2       | -4,06    | 0,48        |
| ENSG00000034713 | GABARAPL2   | -4,07    | 0,45        |
| ENSG00000196476 | C20orf96    | -4,09    | 0,51        |
| ENSG00000274750 | HIST1H3E    | -4,10    | 0,27        |
| ENSG00000198417 | MT1F        | -4,11    | 0,19        |
| ENSG00000167280 | ENGASE      | -4,12    | 0,53        |
| ENSG00000139352 | ASCL1       | -4,13    | 0,60        |
| ENSG00000148358 | GPR107      | -4,14    | 0,61        |
| ENSG00000107562 | CXCL12      | -4,16    | 0,17        |
| ENSG00000170348 | TMED10      | -4,17    | 0,55        |
| ENSG00000212127 | TAS2R14     | -4,17    | 0,30        |
| ENSG00000161911 | TREML1      | -4,18    | 0,36        |
| ENSG00000131100 | ATP6V1E1    | -4,19    | 0,52        |
| ENSG00000130227 | XPO7        | -4,19    | 0,62        |
| ENSG00000111676 | ATN1        | -4,19    | 0,50        |
| ENSG00000180357 | ZNF609      | -4,21    | 0,66        |
| ENSG00000164406 | LEAP2       | -4,22    | 0,58        |
| ENSG00000196735 | HLA-DQA1    | -4,22    | 0,26        |
| ENSG00000120727 | PAIP2       | -4,22    | 0,53        |
| ENSG00000134369 | NAV1        | -4,24    | 0,46        |
| ENSG00000165702 | GFI1B       | -4,25    | 0,68        |

| ensembl gene    | gene symbol | Score(d) | Fold Change |
|-----------------|-------------|----------|-------------|
| ENSG00000197980 | LEKR1       | -4,25    | 0,54        |
| ENSG00000114956 | DGUOK       | -4,25    | 0,58        |
| ENSG00000136205 | TNS3        | -4,27    | 0,30        |
| ENSG00000259207 | ITGB3       | -4,31    | 0,21        |
| ENSG00000117009 | KMO         | -4,31    | 0,09        |
| ENSG00000064225 | ST3GAL6     | -4,32    | 0,48        |
| ENSG00000100934 | SEC23A      | -4,33    | 0,50        |
| ENSG00000255837 | TAS2R20     | -4,33    | 0,27        |
| ENSG00000118689 | FOXO3       | -4,33    | 0,29        |
| ENSG00000139190 | VAMP1       | -4,34    | 0,32        |
| ENSG00000116750 | UCHL5       | -4,34    | 0,47        |
| ENSG00000107984 | DKK1        | -4,35    | 0,19        |
| ENSG00000104866 | PPP1R37     | -4,36    | 0,43        |
| ENSG00000172915 | NBEA        | -4,37    | 0,29        |
| ENSG00000162373 | BEND5       | -4,38    | 0,46        |
| ENSG00000214413 | BBIP1       | -4,40    | 0,48        |
| ENSG00000139318 | DUSP6       | -4,45    | 0,27        |
| ENSG00000006468 | ETV1        | -4,46    | 0,07        |
| ENSG00000139737 | SLAIN1      | -4,46    | 0,40        |
| ENSG00000161267 | BDH1        | -4,47    | 0,27        |
| ENSG00000106415 | GLCCI1      | -4,48    | 0,47        |
| ENSG00000188215 | DCUN1D3     | -4,48    | 0,41        |
| ENSG00000135503 | ACVR1B      | -4,48    | 0,38        |
| ENSG00000163785 | RYK         | -4,52    | 0,53        |
| ENSG00000100647 | SUSD6       | -4,52    | 0,38        |
| ENSG00000102897 | LYRM1       | -4,53    | 0,51        |
| ENSG00000112977 | DAP         | -4,54    | 0,51        |
| ENSG00000163513 | TGFBR2      | -4,55    | 0,34        |
| ENSG00000172728 | FUT10       | -4,55    | 0,50        |
| ENSG00000137814 | HAUS2       | -4,59    | 0,42        |
| ENSG00000119688 | ABCD4       | -4,60    | 0,58        |
| ENSG00000099364 | FBXL19      | -4,63    | 0,59        |
| ENSG00000197959 | DNM3        | -4,72    | 0,51        |
| ENSG00000237441 | RGL2        | -4,73    | 0,42        |
| ENSG00000119669 | IRF2BPL     | -4,73    | 0,55        |
| ENSG00000143222 | UFC1        | -4,74    | 0,55        |
| ENSG00000111341 | MGP         | -4,77    | 0,38        |
| ENSG00000140382 | HMG20A      | -4,79    | 0,46        |
| ENSG00000119711 | ALDH6A1     | -4,84    | 0,39        |
| ENSG00000138738 | PRDM5       | -4,85    | 0,22        |
| ENSG00000119650 | IFT43       | -4,85    | 0,55        |
| ENSG00000154553 | PDLIM3      | -4,87    | 0,18        |
| ENSG00000004534 | RBM6        | -4,88    | 0,49        |
| ENSG00000186918 | ZNF395      | -4,89    | 0,40        |
| ENSG00000105369 | CD79A       | -4,89    | 0,11        |
| ENSG00000136267 | DGKB        | -4,89    | 0,54        |
| ENSG00000134215 | VAV3        | -4,94    | 0,23        |
| ENSG00000065457 | ADAT1       | -4,94    | 0,31        |
| ENSG00000177045 | SIX5        | -4,94    | 0,56        |



| <b>ensembl gene</b> | <b>gene symbol</b> | <b>Score(d)</b> | <b>Fold Change</b> |
|---------------------|--------------------|-----------------|--------------------|
| ENSG00000121318     | TAS2R10            | -4,96           | 0,29               |
| ENSG00000135218     | CD36               | -4,97           | 0,24               |
| ENSG00000196628     | TCF4               | -5,01           | 0,12               |
| ENSG00000160999     | SH2B2              | -5,06           | 0,24               |
| ENSG00000165685     | TMEM52B            | -5,10           | 0,21               |
| ENSG00000163736     | PPBP               | -5,14           | 0,11               |
| ENSG00000213999     | MEF2B              | -5,17           | 0,59               |
| ENSG00000182985     | CADM1              | -5,18           | 0,04               |
| ENSG00000184445     | KNTC1              | -5,21           | 0,39               |
| ENSG00000005961     | ITGA2B             | -5,23           | 0,18               |
| ENSG00000139132     | FGD4               | -5,26           | 0,19               |
| ENSG00000120805     | ARL1               | -5,35           | 0,41               |
| ENSG00000244405     | ETV5               | -5,41           | 0,17               |
| ENSG00000144645     | OSBPL10            | -5,43           | 0,05               |
| ENSG00000219545     | UMAD1              | -5,58           | 0,42               |
| ENSG00000152818     | UTRN               | -5,64           | 0,25               |
| ENSG00000070610     | GBA2               | -5,89           | 0,45               |
| ENSG00000180953     | ST20               | -6,55           | 0,34               |
| ENSG00000176788     | BASP1              | -7,06           | 0,05               |

**Supplementary Table S2.** List of 4847 differentially expressed coding genes in 15PCL compared to 50 MM cases, by SAM analysis at FDR<10%. Transcripts are ordered according to SAM (d) score.

| ensembl gene    | gene symbol | Score(d) | Fold Change |
|-----------------|-------------|----------|-------------|
| ENSG00000101182 | PSMA7       | 7,75     | 2,54        |
| ENSG00000211460 | TSN         | 7,59     | 1,85        |
| ENSG00000198522 | GPN1        | 7,10     | 1,77        |
| ENSG00000120437 | ACAT2       | 6,94     | 2,27        |
| ENSG00000110321 | EIF4G2      | 6,92     | 1,62        |
| ENSG00000180957 | PITPNB      | 6,72     | 2,15        |
| ENSG00000165650 | PDZD8       | 6,60     | 1,78        |
| ENSG00000257103 | LSM14A      | 6,54     | 2,38        |
| ENSG00000100281 | HMGXB4      | 6,30     | 1,89        |
| ENSG00000170881 | RNF139      | 6,27     | 1,80        |
| ENSG00000105849 | TWISTNB     | 6,25     | 2,41        |
| ENSG00000173486 | FKBP2       | 6,20     | 2,57        |
| ENSG00000152332 | UHMK1       | 6,07     | 1,92        |
| ENSG00000007520 | TSR3        | 6,05     | 1,82        |
| ENSG00000177917 | ARL6IP6     | 6,00     | 1,81        |
| ENSG00000131746 | TNS4        | 5,97     | 2,11        |
| ENSG00000170759 | KIF5B       | 5,85     | 1,88        |
| ENSG00000128191 | DGCR8       | 5,75     | 1,92        |
| ENSG00000174839 | DENND6A     | 5,75     | 1,86        |
| ENSG00000100221 | JOSD1       | 5,70     | 1,85        |
| ENSG00000101367 | MAPRE1      | 5,70     | 1,51        |
| ENSG00000198951 | NAGA        | 5,69     | 2,23        |
| ENSG00000185947 | ZNF267      | 5,68     | 3,20        |
| ENSG00000100243 | CYB5R3      | 5,65     | 1,62        |
| ENSG00000139977 | NAA30       | 5,65     | 1,87        |
| ENSG00000162783 | IER5        | 5,63     | 2,70        |
| ENSG00000244624 | KRTAP20-1   | 5,55     | 2,09        |
| ENSG00000162433 | AK4         | 5,52     | 1,75        |
| ENSG00000275700 | AATF        | 5,49     | 1,75        |
| ENSG00000125944 | HNRNPR      | 5,49     | 1,64        |
| ENSG00000132823 | OSER1       | 5,48     | 2,38        |
| ENSG00000183891 | TTC32       | 5,48     | 2,28        |
| ENSG00000274523 | RCC1L       | 5,48     | 1,40        |
| ENSG00000125457 | MIF4GD      | 5,45     | 1,73        |
| ENSG00000124191 | TOX2        | 5,45     | 2,16        |
| ENSG00000118804 | STBD1       | 5,44     | 1,88        |
| ENSG00000256053 | APOPT1      | 5,42     | 1,83        |
| ENSG00000013588 | GPRC5A      | 5,41     | 2,25        |
| ENSG00000085274 | MYNN        | 5,37     | 1,59        |
| ENSG00000181061 | HIGD1A      | 5,37     | 2,10        |
| ENSG00000156976 | EIF4A2      | 5,34     | 3,11        |
| ENSG00000107960 | OBFC1       | 5,34     | 1,58        |
| ENSG00000154723 | ATP5J       | 5,32     | 1,91        |
| ENSG00000164091 | WDR82       | 5,31     | 1,56        |
| ENSG00000100028 | SNRPD3      | 5,29     | 1,79        |

| ensembl gene    | gene symbol | Score(d) | Fold Change |
|-----------------|-------------|----------|-------------|
| ENSG00000106245 | BUD31       | 5,28     | 1,75        |
| ENSG00000056097 | ZFR         | 5,27     | 1,54        |
| ENSG00000115053 | NCL         | 5,24     | 1,55        |
| ENSG00000168488 | ATXN2L      | 5,21     | 1,48        |
| ENSG00000114209 | PDCD10      | 5,19     | 1,69        |
| ENSG00000196141 | SPATS2L     | 5,17     | 2,44        |
| ENSG00000185627 | PSMD13      | 5,16     | 1,73        |
| ENSG00000126247 | CAPNS1      | 5,14     | 1,55        |
| ENSG00000164022 | AIMP1       | 5,14     | 1,40        |
| ENSG00000138071 | ACTR2       | 5,13     | 1,38        |
| ENSG00000163162 | RNF149      | 5,13     | 2,39        |
| ENSG00000169251 | NMD3        | 5,13     | 1,47        |
| ENSG00000173432 | SAA1        | 5,12     | 1,59        |
| ENSG00000136718 | IMP4        | 5,12     | 1,64        |
| ENSG00000141385 | AFG3L2      | 5,09     | 1,76        |
| ENSG00000091140 | DLD         | 5,08     | 1,81        |
| ENSG00000134077 | THUMPD3     | 5,07     | 1,41        |
| ENSG00000182552 | RWDD4       | 5,07     | 2,25        |
| ENSG00000047410 | TPR         | 5,07     | 1,64        |
| ENSG00000083937 | CHMP2B      | 5,07     | 1,63        |
| ENSG00000023191 | RNH1        | 5,05     | 1,82        |
| ENSG00000126945 | HNRNPH2     | 5,05     | 1,80        |
| ENSG00000204843 | DCTN1       | 5,05     | 1,41        |
| ENSG00000183648 | NDUFB1      | 5,04     | 2,51        |
| ENSG00000071127 | WDR1        | 5,03     | 1,69        |
| ENSG00000116473 | RAP1A       | 5,03     | 2,04        |
| ENSG00000131981 | LGALS3      | 5,03     | 3,02        |
| ENSG00000101844 | ATG4A       | 5,00     | 1,54        |
| ENSG00000163714 | U2SURP      | 4,99     | 1,52        |
| ENSG00000099783 | HNRNPM      | 4,99     | 1,55        |
| ENSG00000163636 | PSMD6       | 4,99     | 1,57        |
| ENSG00000105321 | CCDC9       | 4,98     | 1,97        |
| ENSG00000108055 | SMC3        | 4,98     | 1,47        |
| ENSG00000176225 | RTTN        | 4,98     | 2,57        |
| ENSG00000164713 | BRI3        | 4,97     | 1,62        |
| ENSG00000185730 | ZNF696      | 4,95     | 1,33        |
| ENSG00000205937 | RNPS1       | 4,93     | 1,59        |
| ENSG00000138279 | ANXA7       | 4,90     | 1,69        |
| ENSG00000147155 | EBP         | 4,88     | 1,67        |
| ENSG00000138495 | COX17       | 4,88     | 2,35        |
| ENSG00000166224 | SGPL1       | 4,88     | 1,66        |
| ENSG00000139350 | NEDD1       | 4,87     | 1,68        |
| ENSG00000135269 | TES         | 4,87     | 1,87        |
| ENSG00000143977 | SNRPG       | 4,86     | 1,71        |
| ENSG00000196924 | FLNA        | 4,86     | 2,42        |
| ENSG00000101391 | CDK5RAP1    | 4,85     | 1,59        |
| ENSG00000107625 | DDX50       | 4,85     | 1,58        |
| ENSG00000241685 | ARPC1A      | 4,85     | 1,77        |
| ENSG00000082153 | BZW1        | 4,84     | 1,75        |

| ensembl gene    | gene symbol | Score(d) | Fold Change |
|-----------------|-------------|----------|-------------|
| ENSG00000176903 | PNMA1       | 4,84     | 2,11        |
| ENSG00000075975 | MKRN2       | 4,84     | 1,43        |
| ENSG00000146232 | NFKBIE      | 4,83     | 2,10        |
| ENSG00000061794 | MRPS35      | 4,83     | 2,00        |
| ENSG00000173598 | NUDT4       | 4,82     | 1,92        |
| ENSG00000085978 | ATG16L1     | 4,82     | 1,56        |
| ENSG00000158710 | TAGLN2      | 4,81     | 2,40        |
| ENSG00000158526 | TSR2        | 4,80     | 1,59        |
| ENSG00000108107 | RPL28       | 4,78     | 1,61        |
| ENSG00000074800 | ENO1        | 4,77     | 1,65        |
| ENSG00000055044 | NOP58       | 4,77     | 1,53        |
| ENSG00000198231 | DDX42       | 4,77     | 1,53        |
| ENSG00000102241 | HTATSF1     | 4,76     | 1,61        |
| ENSG00000183520 | UTP11       | 4,76     | 1,60        |
| ENSG00000171566 | PLRG1       | 4,75     | 1,88        |
| ENSG00000171262 | FAM98B      | 4,74     | 1,70        |
| ENSG00000151012 | SLC7A11     | 4,74     | 4,03        |
| ENSG00000089048 | ESF1        | 4,74     | 1,94        |
| ENSG00000186577 | C6orf1      | 4,73     | 1,44        |
| ENSG00000162645 | GBP2        | 4,73     | 4,57        |
| ENSG00000068366 | ACSL4       | 4,72     | 1,90        |
| ENSG00000179010 | MRFAP1      | 4,72     | 1,67        |
| ENSG00000023909 | GCLM        | 4,71     | 1,83        |
| ENSG00000103174 | NAGPA       | 4,69     | 1,86        |
| ENSG00000042286 | AIFM2       | 4,68     | 1,39        |
| ENSG00000159202 | UBE2Z       | 4,67     | 1,59        |
| ENSG00000113739 | STC2        | 4,66     | 2,41        |
| ENSG00000165733 | BMS1        | 4,66     | 1,50        |
| ENSG00000125352 | RNF113A     | 4,65     | 1,39        |
| ENSG00000174744 | BRMS1       | 4,64     | 1,41        |
| ENSG00000144567 | FAM134A     | 4,63     | 1,51        |
| ENSG00000113141 | IK          | 4,63     | 1,61        |
| ENSG00000183340 | JRKL        | 4,62     | 1,45        |
| ENSG00000126698 | DNAJC8      | 4,62     | 1,43        |
| ENSG00000154001 | PPP2R5E     | 4,61     | 1,70        |
| ENSG00000013364 | MVP         | 4,61     | 2,14        |
| ENSG00000143774 | GUK1        | 4,60     | 1,43        |
| ENSG00000183527 | PSMG1       | 4,60     | 1,83        |
| ENSG00000119787 | ATL2        | 4,60     | 1,61        |
| ENSG00000130956 | HABP4       | 4,60     | 2,30        |
| ENSG00000186792 | HYAL3       | 4,59     | 1,50        |
| ENSG00000163319 | MRPS18C     | 4,58     | 1,52        |
| ENSG00000007168 | PAFAH1B1    | 4,58     | 1,54        |
| ENSG00000130772 | MED18       | 4,57     | 1,42        |
| ENSG00000076003 | MCM6        | 4,56     | 1,89        |
| ENSG00000164219 | PGGT1B      | 4,56     | 1,59        |
| ENSG00000006125 | AP2B1       | 4,55     | 1,48        |
| ENSG00000139343 | SNRPF       | 4,55     | 1,62        |
| ENSG00000175104 | TRAF6       | 4,54     | 1,95        |

| ensembl gene    | gene symbol   | Score(d) | Fold Change |
|-----------------|---------------|----------|-------------|
| ENSG00000116874 | WARS2         | 4,54     | 1,84        |
| ENSG00000132872 | SYT4          | 4,53     | 1,45        |
| ENSG00000103342 | GSPT1         | 4,53     | 1,69        |
| ENSG00000158480 | SPATA2        | 4,52     | 1,83        |
| ENSG00000188886 | ASTL          | 4,52     | 1,42        |
| ENSG00000100796 | PPP4R3A       | 4,51     | 1,65        |
| ENSG00000114115 | RBP1          | 4,51     | 2,95        |
| ENSG00000114784 | EIF1B         | 4,51     | 2,13        |
| ENSG00000160087 | UBE2J2        | 4,50     | 1,49        |
| ENSG00000153879 | CEBPG         | 4,50     | 1,88        |
| ENSG00000133142 | TCEAL4        | 4,48     | 1,83        |
| ENSG00000123728 | RAP2C         | 4,48     | 1,50        |
| ENSG00000128534 | LSM8          | 4,47     | 1,66        |
| ENSG00000158615 | PPP1R15B      | 4,47     | 1,60        |
| ENSG00000068308 | OTUD5         | 4,47     | 1,38        |
| ENSG00000179331 | RAB39A        | 4,46     | 1,68        |
| ENSG00000120438 | TCP1          | 4,46     | 1,44        |
| ENSG00000173269 | MMRN2         | 4,45     | 1,35        |
| ENSG00000007237 | GAS7          | 4,44     | 1,92        |
| ENSG00000112972 | HMGCS1        | 4,44     | 1,65        |
| ENSG00000117228 | GBP1          | 4,44     | 4,28        |
| ENSG00000166226 | CCT2          | 4,43     | 1,81        |
| ENSG00000123685 | BATF3         | 4,43     | 2,06        |
| ENSG00000196072 | BLOC1S2       | 4,42     | 1,97        |
| ENSG00000109047 | RCVRN         | 4,42     | 1,47        |
| ENSG00000144802 | NFKBIZ        | 4,41     | 2,36        |
| ENSG00000235169 | SMIM1         | 4,41     | 1,34        |
| ENSG00000179950 | PUF60         | 4,41     | 1,44        |
| ENSG00000005075 | POLR2J        | 4,41     | 1,58        |
| ENSG00000118454 | ANKRD13C      | 4,41     | 1,68        |
| ENSG00000091039 | OSBPL8        | 4,40     | 1,57        |
| ENSG00000176485 | PLA2G16       | 4,39     | 2,11        |
| ENSG00000151651 | ADAM8         | 4,39     | 1,66        |
| ENSG00000185883 | ATP6VOC       | 4,38     | 1,29        |
| ENSG00000100100 | PIK3IP1       | 4,38     | 2,05        |
| ENSG00000056558 | TRAF1         | 4,37     | 1,48        |
| ENSG00000274068 | RP11-475E11.9 | 4,37     | 1,52        |
| ENSG00000178913 | TAF7          | 4,37     | 1,50        |
| ENSG00000125726 | CD70          | 4,36     | 1,51        |
| ENSG00000125356 | NDUFA1        | 4,35     | 1,46        |
| ENSG00000173175 | ADCY5         | 4,35     | 1,62        |
| ENSG00000155959 | VBP1          | 4,34     | 1,63        |
| ENSG00000196151 | WDSUB1        | 4,34     | 1,60        |
| ENSG00000178952 | TUFM          | 4,34     | 1,60        |
| ENSG00000183484 | GPR132        | 4,34     | 1,73        |
| ENSG00000073584 | SMARCE1       | 4,33     | 1,70        |
| ENSG00000100106 | TRIOBP        | 4,33     | 1,69        |
| ENSG00000077147 | TM9SF3        | 4,33     | 1,30        |
| ENSG00000100316 | RPL3          | 4,33     | 1,62        |

| ensembl gene    | gene symbol | Score(d) | Fold Change |
|-----------------|-------------|----------|-------------|
| ENSG00000142227 | EMP3        | 4,33     | 1,44        |
| ENSG00000198677 | TTC37       | 4,32     | 1,60        |
| ENSG00000185246 | PRPF39      | 4,32     | 1,74        |
| ENSG00000130935 | NOL11       | 4,31     | 1,78        |
| ENSG00000198783 | ZNF830      | 4,31     | 1,66        |
| ENSG00000147119 | CHST7       | 4,30     | 1,78        |
| ENSG00000006634 | DBF4        | 4,30     | 1,70        |
| ENSG00000204314 | PRRT1       | 4,30     | 1,36        |
| ENSG00000126353 | CCR7        | 4,30     | 2,55        |
| ENSG00000154359 | LONRF1      | 4,30     | 2,35        |
| ENSG00000171612 | SLC25A33    | 4,29     | 1,79        |
| ENSG00000156261 | CCT8        | 4,29     | 1,75        |
| ENSG00000100941 | PNN         | 4,29     | 1,75        |
| ENSG00000170242 | USP47       | 4,29     | 1,83        |
| ENSG00000143344 | RGL1        | 4,28     | 3,56        |
| ENSG00000133641 | C12orf29    | 4,28     | 1,52        |
| ENSG00000106459 | NRF1        | 4,28     | 1,64        |
| ENSG00000077549 | CAPZB       | 4,27     | 1,37        |
| ENSG00000164430 | MB21D1      | 4,27     | 1,83        |
| ENSG00000138785 | INTS12      | 4,27     | 1,46        |
| ENSG00000130703 | OSBPL2      | 4,27     | 1,44        |
| ENSG00000091317 | CMTM6       | 4,26     | 1,68        |
| ENSG00000136758 | YME1L1      | 4,26     | 1,40        |
| ENSG00000115541 | HSPE1       | 4,26     | 2,93        |
| ENSG00000173848 | NET1        | 4,26     | 2,37        |
| ENSG00000182698 | RESP18      | 4,26     | 1,22        |
| ENSG00000005844 | ITGAL       | 4,25     | 2,28        |
| ENSG00000269404 | SPIB        | 4,25     | 1,81        |
| ENSG00000162607 | USP1        | 4,25     | 1,70        |
| ENSG00000155380 | SLC16A1     | 4,24     | 1,85        |
| ENSG00000174109 | C16orf91    | 4,24     | 1,37        |
| ENSG00000054118 | THRAP3      | 4,24     | 1,47        |
| ENSG00000110660 | SLC35F2     | 4,24     | 2,11        |
| ENSG00000163719 | MTMR14      | 4,23     | 1,61        |
| ENSG00000167553 | TUBA1C      | 4,23     | 1,33        |
| ENSG00000147140 | NONO        | 4,22     | 1,41        |
| ENSG00000100603 | SNW1        | 4,22     | 1,51        |
| ENSG00000186806 | VSIG10L     | 4,22     | 1,34        |
| ENSG00000101695 | RNF125      | 4,22     | 3,24        |
| ENSG00000004961 | HCCS        | 4,22     | 1,57        |
| ENSG00000123136 | DDX39A      | 4,22     | 1,60        |
| ENSG00000187170 | LCE4A       | 4,22     | 1,28        |
| ENSG00000239900 | ADSL        | 4,22     | 1,72        |
| ENSG00000145022 | TCTA        | 4,21     | 1,58        |
| ENSG00000113575 | PPP2CA      | 4,21     | 1,68        |
| ENSG00000085721 | RRN3        | 4,21     | 1,58        |
| ENSG00000107581 | EIF3A       | 4,21     | 1,28        |
| ENSG00000165732 | DDX21       | 4,20     | 1,61        |
| ENSG00000115816 | CEBPZ       | 4,20     | 1,65        |

| ensembl gene    | gene symbol | Score(d) | Fold Change |
|-----------------|-------------|----------|-------------|
| ENSG00000255112 | CHMP1B      | 4,18     | 1,50        |
| ENSG00000134265 | NAPG        | 4,18     | 1,42        |
| ENSG00000137404 | NRM         | 4,17     | 1,69        |
| ENSG00000120063 | GNA13       | 4,17     | 1,52        |
| ENSG00000147526 | TACC1       | 4,17     | 2,47        |
| ENSG00000181191 | PJA1        | 4,17     | 1,57        |
| ENSG00000236543 | RP11-98L5.5 | 4,16     | 1,38        |
| ENSG00000006652 | IFRD1       | 4,16     | 1,86        |
| ENSG00000116852 | KIF21B      | 4,16     | 1,65        |
| ENSG00000095485 | CWF19L1     | 4,15     | 1,50        |
| ENSG00000184575 | XPOT        | 4,15     | 1,74        |
| ENSG00000146757 | ZNF92       | 4,15     | 1,59        |
| ENSG00000165195 | PIGA        | 4,14     | 2,02        |
| ENSG00000067900 | ROCK1       | 4,14     | 1,50        |
| ENSG00000155729 | KCTD18      | 4,13     | 1,38        |
| ENSG00000236334 | PPIAL4G     | 4,13     | 1,53        |
| ENSG00000112031 | MTRF1L      | 4,13     | 1,77        |
| ENSG00000196214 | ZNF766      | 4,13     | 1,61        |
| ENSG00000075089 | ACTR6       | 4,13     | 1,77        |
| ENSG00000106153 | CHCHD2      | 4,13     | 1,72        |
| ENSG00000277791 | PSMB3       | 4,12     | 1,49        |
| ENSG00000171497 | PPID        | 4,12     | 1,81        |
| ENSG00000169967 | MAP3K2      | 4,11     | 1,61        |
| ENSG00000164758 | MED30       | 4,11     | 1,69        |
| ENSG00000107537 | PHYH        | 4,11     | 1,64        |
| ENSG00000109445 | ZNF330      | 4,10     | 1,57        |
| ENSG00000116809 | ZBTB17      | 4,10     | 1,34        |
| ENSG00000168297 | PXK         | 4,10     | 1,92        |
| ENSG00000134186 | PRPF38B     | 4,09     | 1,61        |
| ENSG00000168884 | TNIP2       | 4,08     | 1,52        |
| ENSG00000075223 | SEMA3C      | 4,08     | 1,87        |
| ENSG00000127125 | PPCS        | 4,08     | 1,63        |
| ENSG00000171202 | TMEM126A    | 4,07     | 1,68        |
| ENSG00000170088 | TMEM192     | 4,07     | 1,42        |
| ENSG00000189319 | FAM53B      | 4,07     | 2,07        |
| ENSG00000147251 | DOCK11      | 4,07     | 2,21        |
| ENSG00000066427 | ATXN3       | 4,06     | 1,59        |
| ENSG00000132436 | FIGNL1      | 4,06     | 1,95        |
| ENSG00000119403 | PHF19       | 4,06     | 1,69        |
| ENSG00000083807 | SLC27A5     | 4,05     | 1,90        |
| ENSG00000004700 | RECQL       | 4,05     | 1,70        |
| ENSG00000156232 | WHAMM       | 4,05     | 1,65        |
| ENSG00000136842 | TMOD1       | 4,05     | 2,23        |
| ENSG00000131871 | VIMP        | 4,05     | 1,51        |
| ENSG00000162929 | KIAA1841    | 4,04     | 1,57        |
| ENSG00000143815 | LBR         | 4,04     | 1,84        |
| ENSG00000099995 | SF3A1       | 4,04     | 1,49        |
| ENSG00000067334 | DNTTIP2     | 4,04     | 1,68        |
| ENSG00000123143 | PKN1        | 4,04     | 1,45        |

| ensembl gene    | gene symbol  | Score(d) | Fold Change |
|-----------------|--------------|----------|-------------|
| ENSG00000178287 | SPAG11A      | 4,04     | 1,63        |
| ENSG00000158290 | CUL4B        | 4,03     | 1,44        |
| ENSG00000163584 | RPL22L1      | 4,03     | 2,25        |
| ENSG00000177854 | TMEM187      | 4,03     | 1,53        |
| ENSG00000138231 | DBR1         | 4,03     | 1,46        |
| ENSG00000173545 | ZNF622       | 4,03     | 1,57        |
| ENSG00000134198 | TSPAN2       | 4,03     | 2,81        |
| ENSG00000123240 | OPTN         | 4,03     | 1,63        |
| ENSG00000164209 | SLC25A46     | 4,02     | 1,36        |
| ENSG00000175110 | MRPS22       | 4,02     | 1,44        |
| ENSG00000214309 | MBLAC1       | 4,02     | 1,79        |
| ENSG00000197930 | ERO1A        | 4,02     | 1,43        |
| ENSG00000130489 | SCO2         | 4,02     | 1,37        |
| ENSG00000189306 | RRP7A        | 4,02     | 1,27        |
| ENSG00000163743 | RCHY1        | 4,02     | 1,45        |
| ENSG00000048544 | MRPS10       | 4,01     | 1,41        |
| ENSG00000064419 | TNPO3        | 4,01     | 1,28        |
| ENSG00000157796 | WDR19        | 4,01     | 1,86        |
| ENSG00000259075 | POC1B-GALNT4 | 4,01     | 1,85        |
| ENSG00000100003 | SEC14L2      | 4,01     | 2,16        |
| ENSG00000009780 | FAM76A       | 4,01     | 1,41        |
| ENSG00000129083 | COPB1        | 4,01     | 2,32        |
| ENSG00000008018 | PSMB1        | 4,00     | 1,53        |
| ENSG00000205531 | NAP1L4       | 3,99     | 1,38        |
| ENSG00000069345 | DNAJA2       | 3,99     | 1,56        |
| ENSG00000107863 | ARHGAP21     | 3,99     | 2,05        |
| ENSG00000119041 | GTF3C3       | 3,98     | 1,52        |
| ENSG00000119185 | ITGB1BP1     | 3,98     | 1,56        |
| ENSG00000240542 | KRTAP9-1     | 3,98     | 1,64        |
| ENSG00000136436 | CALCOCO2     | 3,98     | 1,41        |
| ENSG00000087470 | DNM1L        | 3,98     | 1,48        |
| ENSG00000149136 | SSRP1        | 3,98     | 1,68        |
| ENSG00000102007 | PLP2         | 3,97     | 1,38        |
| ENSG00000213213 | CCDC183      | 3,97     | 1,62        |
| ENSG00000101350 | KIF3B        | 3,97     | 1,42        |
| ENSG00000197885 | NKIRAS1      | 3,97     | 2,05        |
| ENSG00000237765 | FAM200B      | 3,96     | 1,54        |
| ENSG00000224960 | PPP4R3CP     | 3,96     | 1,94        |
| ENSG00000163041 | H3F3A        | 3,96     | 1,56        |
| ENSG00000184545 | DUSP8        | 3,96     | 1,77        |
| ENSG00000073712 | FERMT2       | 3,96     | 3,38        |
| ENSG00000102858 | MGRN1        | 3,95     | 1,39        |
| ENSG00000136754 | ABI1         | 3,95     | 1,47        |
| ENSG00000128309 | MPST         | 3,94     | 1,28        |
| ENSG00000121594 | CD80         | 3,94     | 1,71        |
| ENSG00000133703 | KRAS         | 3,94     | 1,62        |
| ENSG00000155926 | SLA          | 3,93     | 2,75        |
| ENSG00000197928 | ZNF677       | 3,93     | 2,07        |
| ENSG00000112701 | SENP6        | 3,93     | 1,34        |



| ensembl gene    | gene symbol | Score(d) | Fold Change |
|-----------------|-------------|----------|-------------|
| ENSG00000107897 | ACBD5       | 3,92     | 1,41        |
| ENSG00000158669 | GPAT4       | 3,92     | 1,51        |
| ENSG00000079134 | THOC1       | 3,92     | 1,47        |
| ENSG00000165502 | RPL36AL     | 3,92     | 1,49        |
| ENSG00000167613 | LAIR1       | 3,92     | 2,83        |
| ENSG00000197780 | TAF13       | 3,92     | 1,67        |
| ENSG00000183735 | TBK1        | 3,92     | 1,80        |
| ENSG00000080824 | HSP90AA1    | 3,91     | 1,95        |
| ENSG00000123983 | ACSL3       | 3,91     | 1,47        |
| ENSG00000103507 | BCKDK       | 3,91     | 1,50        |
| ENSG00000103502 | CDIPT       | 3,91     | 1,44        |
| ENSG00000162520 | SYNC        | 3,91     | 1,39        |
| ENSG00000163946 | FAM208A     | 3,90     | 1,52        |
| ENSG00000122565 | CBX3        | 3,90     | 1,64        |
| ENSG00000087191 | PSMC5       | 3,90     | 1,70        |
| ENSG00000163634 | THOC7       | 3,89     | 1,61        |
| ENSG00000174885 | NLRP6       | 3,89     | 1,66        |
| ENSG00000031698 | SARS        | 3,89     | 1,81        |
| ENSG00000182944 | EWSR1       | 3,88     | 1,40        |
| ENSG00000107485 | GATA3       | 3,88     | 2,10        |
| ENSG00000015171 | ZMYND11     | 3,88     | 1,44        |
| ENSG00000114416 | FXR1        | 3,88     | 1,41        |
| ENSG00000100056 | DGCR14      | 3,88     | 1,31        |
| ENSG00000161057 | PSMC2       | 3,87     | 1,46        |
| ENSG00000171100 | MTM1        | 3,87     | 1,60        |
| ENSG00000132792 | CTNBL1      | 3,86     | 1,38        |
| ENSG00000086061 | DNAJA1      | 3,86     | 1,72        |
| ENSG00000115339 | GALNT3      | 3,86     | 2,92        |
| ENSG00000184144 | CNTN2       | 3,86     | 1,50        |
| ENSG00000153147 | SMARCA5     | 3,86     | 1,31        |
| ENSG00000119326 | CTNNAL1     | 3,86     | 2,49        |
| ENSG00000144741 | SLC25A26    | 3,85     | 1,38        |
| ENSG00000171102 | OBP2B       | 3,85     | 1,74        |
| ENSG00000116691 | MIIP        | 3,85     | 1,40        |
| ENSG00000196967 | ZNF585A     | 3,85     | 1,66        |
| ENSG00000131504 | DIAPH1      | 3,84     | 1,70        |
| ENSG00000154978 | VOPP1       | 3,84     | 2,07        |
| ENSG00000119541 | VPS4B       | 3,84     | 1,50        |
| ENSG00000125821 | DTD1        | 3,84     | 1,51        |
| ENSG00000099800 | TIMM13      | 3,84     | 1,76        |
| ENSG00000108588 | CCDC47      | 3,83     | 1,33        |
| ENSG00000138081 | FBXO11      | 3,83     | 1,43        |
| ENSG00000101474 | APMAP       | 3,83     | 1,43        |
| ENSG00000198758 | EPS8L3      | 3,83     | 1,42        |
| ENSG00000023734 | STRAP       | 3,83     | 1,48        |
| ENSG00000114742 | WDR48       | 3,83     | 1,84        |
| ENSG00000215906 | LACTBL1     | 3,82     | 1,21        |
| ENSG00000232388 | LINC00493   | 3,82     | 1,68        |
| ENSG00000162441 | LZIC        | 3,82     | 1,50        |

| ensembl gene    | gene symbol | Score(d) | Fold Change |
|-----------------|-------------|----------|-------------|
| ENSG00000104856 | RELB        | 3,82     | 1,73        |
| ENSG00000156269 | NAA11       | 3,81     | 1,60        |
| ENSG00000138068 | SULT6B1     | 3,81     | 1,29        |
| ENSG00000130764 | LRRC47      | 3,81     | 1,36        |
| ENSG00000176531 | PHLDB3      | 3,80     | 1,45        |
| ENSG00000164221 | CCDC112     | 3,80     | 1,61        |
| ENSG00000143971 | ETAA1       | 3,80     | 1,76        |
| ENSG00000151576 | QTRT2       | 3,79     | 1,46        |
| ENSG00000137955 | RABGGTB     | 3,79     | 1,62        |
| ENSG00000204659 | CBY3        | 3,79     | 1,41        |
| ENSG0000018510  | AGPS        | 3,79     | 1,39        |
| ENSG00000187522 | HSPA14      | 3,79     | 1,65        |
| ENSG00000173660 | UQCRH       | 3,79     | 1,70        |
| ENSG00000104312 | RIPK2       | 3,78     | 1,66        |
| ENSG00000123737 | EXOSC9      | 3,78     | 1,37        |
| ENSG00000156795 | WDYHV1      | 3,78     | 1,50        |
| ENSG00000176853 | FAM91A1     | 3,78     | 1,35        |
| ENSG00000035681 | NSMAF       | 3,78     | 1,77        |
| ENSG00000140575 | IQGAP1      | 3,78     | 1,38        |
| ENSG00000130766 | SESN2       | 3,78     | 2,31        |
| ENSG00000170802 | FOXN2       | 3,78     | 1,50        |
| ENSG00000183549 | ACSM5       | 3,78     | 1,46        |
| ENSG00000116171 | SCP2        | 3,77     | 1,54        |
| ENSG00000081377 | CDC14B      | 3,77     | 1,93        |
| ENSG00000092201 | SUPT16H     | 3,77     | 1,64        |
| ENSG00000196639 | HRH1        | 3,77     | 1,28        |
| ENSG00000144744 | UBA3        | 3,76     | 1,32        |
| ENSG00000181523 | SGSH        | 3,76     | 1,50        |
| ENSG00000172538 | FAM170B     | 3,76     | 1,21        |
| ENSG00000155906 | RMND1       | 3,76     | 1,59        |
| ENSG00000101146 | RAE1        | 3,76     | 1,40        |
| ENSG00000101052 | IFT52       | 3,75     | 1,55        |
| ENSG00000112308 | C6orf62     | 3,75     | 1,41        |
| ENSG00000154640 | BTG3        | 3,75     | 2,29        |
| ENSG00000262919 | FAM58A      | 3,75     | 1,37        |
| ENSG00000104549 | SQLE        | 3,75     | 2,25        |
| ENSG00000254087 | LYN         | 3,75     | 1,63        |
| ENSG00000005059 | CCDC109B    | 3,74     | 1,50        |
| ENSG00000236637 | IFNA4       | 3,74     | 1,48        |
| ENSG00000067533 | RRP15       | 3,74     | 1,70        |
| ENSG00000166483 | WEE1        | 3,74     | 3,04        |
| ENSG00000169020 | ATP5I       | 3,74     | 1,36        |
| ENSG00000136167 | LCP1        | 3,74     | 3,44        |
| ENSG00000187555 | USP7        | 3,74     | 1,28        |
| ENSG00000265241 | RBM8A       | 3,74     | 1,61        |
| ENSG00000089234 | BRAP        | 3,73     | 1,46        |
| ENSG00000166913 | YWHAB       | 3,73     | 1,40        |
| ENSG00000125970 | RALY        | 3,73     | 1,56        |
| ENSG00000213231 | TCL1B       | 3,73     | 2,33        |

| ensembl gene    | gene symbol   | Score(d) | Fold Change |
|-----------------|---------------|----------|-------------|
| ENSG00000174021 | GNG5          | 3,73     | 1,98        |
| ENSG00000102271 | KLHL4         | 3,72     | 2,96        |
| ENSG00000105254 | TBCB          | 3,72     | 1,56        |
| ENSG00000101084 | C20orf24      | 3,72     | 1,67        |
| ENSG00000182809 | CRIP2         | 3,72     | 1,80        |
| ENSG00000138794 | CASP6         | 3,72     | 1,59        |
| ENSG00000179826 | MRGPRX3       | 3,72     | 1,33        |
| ENSG00000080845 | DLGAP4        | 3,72     | 1,62        |
| ENSG00000160932 | LY6E          | 3,71     | 2,64        |
| ENSG00000127328 | RAB3IP        | 3,71     | 1,55        |
| ENSG00000165637 | VDAC2         | 3,71     | 1,29        |
| ENSG00000204264 | PSMB8         | 3,70     | 1,94        |
| ENSG00000146425 | DYNLT1        | 3,70     | 1,71        |
| ENSG00000162341 | TPCN2         | 3,70     | 1,43        |
| ENSG00000160799 | CCDC12        | 3,70     | 1,49        |
| ENSG00000237190 | CDKN2AIPNL    | 3,70     | 1,48        |
| ENSG00000204887 | KRTAP1-4      | 3,70     | 1,41        |
| ENSG00000131828 | PDHA1         | 3,70     | 1,39        |
| ENSG00000167720 | SRR           | 3,70     | 1,67        |
| ENSG00000135090 | TAOK3         | 3,70     | 1,65        |
| ENSG00000115091 | ACTR3         | 3,69     | 1,31        |
| ENSG00000167291 | TBC1D16       | 3,69     | 1,48        |
| ENSG00000119950 | MXI1          | 3,69     | 1,65        |
| ENSG00000122335 | SERAC1        | 3,69     | 1,54        |
| ENSG00000114520 | SNX4          | 3,69     | 1,53        |
| ENSG00000170340 | B3GNT2        | 3,69     | 1,45        |
| ENSG00000168003 | SLC3A2        | 3,68     | 1,48        |
| ENSG00000134313 | KIDINS220     | 3,68     | 1,51        |
| ENSG00000182208 | MOB2          | 3,68     | 1,34        |
| ENSG00000172893 | DHCR7         | 3,68     | 1,51        |
| ENSG00000100097 | LGALS1        | 3,68     | 1,84        |
| ENSG00000131711 | MAP1B         | 3,68     | 4,06        |
| ENSG00000197106 | SLC6A17       | 3,68     | 1,37        |
| ENSG00000266338 | NBPF15        | 3,67     | 1,58        |
| ENSG00000144635 | DYNC1LI1      | 3,67     | 1,40        |
| ENSG00000163590 | PPM1L         | 3,67     | 1,85        |
| ENSG00000155330 | C16orf87      | 3,67     | 1,79        |
| ENSG00000165644 | COMTD1        | 3,67     | 1,38        |
| ENSG00000100596 | SPTLC2        | 3,67     | 1,70        |
| ENSG00000006007 | GDE1          | 3,67     | 1,37        |
| ENSG00000272899 | RP11-309L24.4 | 3,67     | 1,37        |
| ENSG00000093000 | NUP50         | 3,66     | 1,43        |
| ENSG00000174749 | C4orf32       | 3,66     | 1,61        |
| ENSG00000197540 | GZMM          | 3,66     | 1,23        |
| ENSG00000221823 | PPP3R1        | 3,66     | 1,34        |
| ENSG00000143367 | TUFT1         | 3,65     | 1,54        |
| ENSG00000187608 | ISG15         | 3,65     | 1,65        |
| ENSG00000062650 | WAPL          | 3,65     | 1,39        |
| ENSG00000162909 | CAPN2         | 3,64     | 1,83        |

| ensembl gene    | gene symbol  | Score(d) | Fold Change |
|-----------------|--------------|----------|-------------|
| ENSG00000183741 | CBX6         | 3,64     | 1,71        |
| ENSG00000281899 | C1QTNF9B-AS1 | 3,64     | 1,28        |
| ENSG00000170385 | SLC30A1      | 3,64     | 1,72        |
| ENSG00000196470 | SIAH1        | 3,63     | 1,79        |
| ENSG00000157870 | FAM213B      | 3,63     | 1,33        |
| ENSG00000107771 | CCSER2       | 3,63     | 1,43        |
| ENSG00000013441 | CLK1         | 3,63     | 1,53        |
| ENSG00000185189 | NRBP2        | 3,63     | 1,28        |
| ENSG00000197125 | OR8B8        | 3,62     | 1,29        |
| ENSG00000165006 | UBAP1        | 3,62     | 1,46        |
| ENSG00000230124 | ACBD6        | 3,62     | 1,52        |
| ENSG00000118007 | STAG1        | 3,62     | 1,33        |
| ENSG00000119285 | HEATR1       | 3,62     | 1,63        |
| ENSG00000153165 | RGPD3        | 3,62     | 1,88        |
| ENSG00000168159 | RNF187       | 3,61     | 1,61        |
| ENSG00000130254 | SAFB2        | 3,61     | 1,55        |
| ENSG00000015479 | MATR3        | 3,61     | 1,81        |
| ENSG00000163904 | SENP2        | 3,61     | 1,66        |
| ENSG00000118242 | MREG         | 3,61     | 1,78        |
| ENSG00000240204 | SMKR1        | 3,61     | 1,54        |
| ENSG00000151287 | TEX30        | 3,61     | 1,87        |
| ENSG00000134698 | AGO4         | 3,60     | 2,01        |
| ENSG00000119673 | ACOT2        | 3,60     | 2,23        |
| ENSG00000224531 | SMIM13       | 3,60     | 1,44        |
| ENSG00000091436 | AC013461.1   | 3,60     | 2,00        |
| ENSG00000128283 | CDC42EP1     | 3,60     | 1,33        |
| ENSG00000112305 | SMAP1        | 3,59     | 1,35        |
| ENSG00000214367 | HAUS3        | 3,59     | 2,01        |
| ENSG00000151553 | FAM160B1     | 3,59     | 1,69        |
| ENSG00000160271 | RALGDS       | 3,59     | 1,69        |
| ENSG00000145365 | TIFA         | 3,59     | 1,69        |
| ENSG00000124089 | MC3R         | 3,59     | 1,22        |
| ENSG00000275152 | CCL16        | 3,59     | 1,32        |
| ENSG00000178473 | UCN3         | 3,59     | 1,23        |
| ENSG00000174840 | PDE12        | 3,58     | 1,46        |
| ENSG00000060971 | ACAA1        | 3,58     | 1,39        |
| ENSG00000185633 | NDUFA4L2     | 3,58     | 1,45        |
| ENSG00000143633 | C1orf131     | 3,58     | 1,54        |
| ENSG00000163444 | TMEM183A     | 3,57     | 1,65        |
| ENSG00000177733 | HNRNPA0      | 3,57     | 1,38        |
| ENSG00000152242 | C18orf25     | 3,56     | 1,41        |
| ENSG00000100345 | MYH9         | 3,56     | 1,69        |
| ENSG00000157368 | IL34         | 3,56     | 1,33        |
| ENSG00000117614 | SYF2         | 3,55     | 1,43        |
| ENSG00000142871 | CYR61        | 3,55     | 1,33        |
| ENSG00000156515 | HK1          | 3,55     | 1,72        |
| ENSG00000244509 | APOBEC3C     | 3,55     | 1,78        |
| ENSG00000181826 | RELL1        | 3,55     | 1,89        |
| ENSG00000240857 | RDH14        | 3,55     | 1,31        |

| ensembl gene    | gene symbol | Score(d) | Fold Change |
|-----------------|-------------|----------|-------------|
| ENSG00000107593 | PKD2L1      | 3,54     | 1,32        |
| ENSG00000169860 | P2RY1       | 3,54     | 1,25        |
| ENSG00000067167 | TRAM1       | 3,54     | 1,28        |
| ENSG00000136710 | CCDC115     | 3,54     | 1,24        |
| ENSG00000124140 | SLC12A5     | 3,54     | 1,45        |
| ENSG00000134697 | GNL2        | 3,54     | 1,48        |
| ENSG00000182557 | SPNS3       | 3,53     | 1,30        |
| ENSG00000124134 | KCNS1       | 3,53     | 1,20        |
| ENSG00000103126 | AXIN1       | 3,53     | 1,32        |
| ENSG00000127334 | DYRK2       | 3,53     | 1,80        |
| ENSG00000010810 | FYN         | 3,52     | 2,26        |
| ENSG00000180488 | FAM73A      | 3,52     | 1,43        |
| ENSG00000153574 | RPIA        | 3,52     | 1,43        |
| ENSG00000083168 | KAT6A       | 3,52     | 1,38        |
| ENSG00000099942 | CRKL        | 3,52     | 1,32        |
| ENSG00000151914 | DST         | 3,51     | 2,52        |
| ENSG00000092330 | TINF2       | 3,51     | 1,34        |
| ENSG00000047849 | MAP4        | 3,51     | 1,46        |
| ENSG00000153310 | FAM49B      | 3,51     | 1,54        |
| ENSG00000104064 | GABPB1      | 3,51     | 1,74        |
| ENSG00000137776 | SLTM        | 3,51     | 1,41        |
| ENSG00000104447 | TRPS1       | 3,51     | 2,69        |
| ENSG00000109586 | GALNT7      | 3,51     | 1,64        |
| ENSG00000167618 | LAIR2       | 3,50     | 1,58        |
| ENSG00000155961 | RAB39B      | 3,50     | 1,54        |
| ENSG00000109846 | CRYAB       | 3,50     | 1,21        |
| ENSG00000118197 | DDX59       | 3,50     | 1,60        |
| ENSG00000171861 | MRM3        | 3,50     | 1,48        |
| ENSG00000197417 | SHPK        | 3,50     | 1,64        |
| ENSG00000160993 | ALKBH4      | 3,50     | 1,24        |
| ENSG00000145832 | SLC25A48    | 3,49     | 1,42        |
| ENSG00000145216 | FIP1L1      | 3,49     | 1,34        |
| ENSG00000170876 | TMEM43      | 3,49     | 1,54        |
| ENSG00000136930 | PSMB7       | 3,49     | 1,37        |
| ENSG00000100485 | SOS2        | 3,49     | 1,84        |
| ENSG00000103266 | STUB1       | 3,49     | 1,47        |
| ENSG00000144747 | TMF1        | 3,49     | 1,46        |
| ENSG00000184647 | PRSS55      | 3,49     | 1,24        |
| ENSG00000139697 | SBNO1       | 3,48     | 1,39        |
| ENSG00000135801 | TAF5L       | 3,48     | 1,40        |
| ENSG00000100591 | AHSA1       | 3,48     | 1,56        |
| ENSG00000160908 | ZNF394      | 3,48     | 1,33        |
| ENSG00000144426 | NBEAL1      | 3,48     | 1,55        |
| ENSG00000177684 | DEFB114     | 3,48     | 1,31        |
| ENSG00000100083 | GGA1        | 3,48     | 1,31        |
| ENSG00000145247 | OCIAD2      | 3,47     | 1,46        |
| ENSG00000137876 | RSL24D1     | 3,47     | 1,49        |
| ENSG00000140612 | SEC11A      | 3,47     | 1,54        |
| ENSG00000105507 | CABP5       | 3,47     | 1,25        |

| ensembl gene    | gene symbol | Score(d) | Fold Change |
|-----------------|-------------|----------|-------------|
| ENSG00000168591 | TMUB2       | 3,47     | 1,23        |
| ENSG00000136634 | IL10        | 3,47     | 1,86        |
| ENSG00000106397 | PLOD3       | 3,46     | 1,59        |
| ENSG00000170185 | USP38       | 3,46     | 1,39        |
| ENSG00000197019 | SERTAD1     | 3,46     | 1,46        |
| ENSG00000049541 | RFC2        | 3,46     | 1,52        |
| ENSG00000104472 | CHRA1       | 3,46     | 1,50        |
| ENSG00000165678 | GHITM       | 3,46     | 1,30        |
| ENSG00000100297 | MCM5        | 3,46     | 1,58        |
| ENSG00000092871 | RFFL        | 3,46     | 1,51        |
| ENSG00000159023 | EPB41       | 3,46     | 1,30        |
| ENSG00000188295 | ZNF669      | 3,46     | 1,30        |
| ENSG00000175203 | DCTN2       | 3,45     | 1,43        |
| ENSG00000002919 | SNX11       | 3,45     | 1,33        |
| ENSG00000072864 | NDE1        | 3,45     | 1,51        |
| ENSG00000160179 | ABCG1       | 3,45     | 2,80        |
| ENSG00000105251 | SHD         | 3,45     | 1,40        |
| ENSG00000166333 | ILK         | 3,44     | 1,42        |
| ENSG00000116752 | BCAS2       | 3,44     | 1,36        |
| ENSG00000180185 | FAHD1       | 3,44     | 1,31        |
| ENSG00000068903 | SIRT2       | 3,44     | 1,53        |
| ENSG00000154174 | TOMM70      | 3,44     | 1,53        |
| ENSG00000166012 | TAF1D       | 3,44     | 1,61        |
| ENSG00000105193 | RPS16       | 3,44     | 1,99        |
| ENSG00000174775 | HRAS        | 3,43     | 1,22        |
| ENSG00000139269 | INHBE       | 3,43     | 2,84        |
| ENSG00000104142 | VPS18       | 3,43     | 1,27        |
| ENSG00000102172 | SMS         | 3,43     | 1,54        |
| ENSG00000157045 | NTAN1       | 3,43     | 1,84        |
| ENSG00000111911 | HINT3       | 3,42     | 1,36        |
| ENSG00000101928 | MOSPD1      | 3,42     | 1,50        |
| ENSG00000213341 | CHUK        | 3,42     | 1,53        |
| ENSG00000214642 | DEFB113     | 3,42     | 1,26        |
| ENSG00000160326 | SLC2A6      | 3,42     | 1,27        |
| ENSG00000197951 | ZNF71       | 3,42     | 1,38        |
| ENSG00000181744 | C3orf58     | 3,42     | 1,71        |
| ENSG00000137055 | PLAA        | 3,42     | 1,55        |
| ENSG00000196466 | ZNF799      | 3,42     | 1,64        |
| ENSG00000123505 | AMD1        | 3,42     | 1,55        |
| ENSG00000188739 | RBM34       | 3,41     | 1,98        |
| ENSG00000128609 | NDUFA5      | 3,41     | 1,36        |
| ENSG00000115649 | CNPPD1      | 3,41     | 1,54        |
| ENSG00000198060 | 42799       | 3,41     | 1,58        |
| ENSG00000204524 | ZNF805      | 3,40     | 1,53        |
| ENSG00000176920 | FUT2        | 3,40     | 1,30        |
| ENSG00000215301 | DDX3X       | 3,40     | 1,37        |
| ENSG00000126775 | ATG14       | 3,40     | 1,63        |
| ENSG00000178988 | MRFAP1L1    | 3,40     | 1,37        |
| ENSG00000123689 | GOS2        | 3,40     | 2,12        |

| ensembl gene    | gene symbol | Score(d) | Fold Change |
|-----------------|-------------|----------|-------------|
| ENSG00000144713 | RPL32       | 3,39     | 1,60        |
| ENSG00000114166 | KAT2B       | 3,39     | 1,42        |
| ENSG00000119718 | EIF2B2      | 3,39     | 1,46        |
| ENSG00000119689 | DLST        | 3,39     | 1,44        |
| ENSG00000068079 | IFI35       | 3,39     | 1,58        |
| ENSG00000069493 | CLEC2D      | 3,39     | 2,42        |
| ENSG00000136960 | ENPP2       | 3,39     | 2,90        |
| ENSG00000221989 | OR2A2       | 3,39     | 1,36        |
| ENSG00000172175 | MALT1       | 3,39     | 1,51        |
| ENSG00000241563 | CORT        | 3,39     | 1,33        |
| ENSG00000227471 | AKR1B15     | 3,39     | 1,77        |
| ENSG00000151461 | UPF2        | 3,38     | 1,49        |
| ENSG00000114978 | MOB1A       | 3,38     | 1,37        |
| ENSG00000138685 | FGF2        | 3,38     | 3,17        |
| ENSG00000143167 | GPA33       | 3,38     | 1,35        |
| ENSG00000007944 | MYLIP       | 3,38     | 1,90        |
| ENSG00000162377 | COA7        | 3,38     | 1,38        |
| ENSG00000124228 | DDX27       | 3,38     | 1,23        |
| ENSG00000204388 | HSPA1B      | 3,38     | 2,71        |
| ENSG00000115762 | PLEKHB2     | 3,38     | 1,50        |
| ENSG00000108651 | UTP6        | 3,37     | 1,44        |
| ENSG00000121691 | CAT         | 3,37     | 1,50        |
| ENSG00000198271 | KRTAP4-5    | 3,37     | 1,23        |
| ENSG00000072609 | CHFR        | 3,37     | 1,44        |
| ENSG00000166780 | C16orf45    | 3,37     | 1,37        |
| ENSG00000242173 | ARHGDIG     | 3,37     | 1,27        |
| ENSG00000017797 | RALBP1      | 3,37     | 1,46        |
| ENSG00000198909 | MAP3K3      | 3,37     | 1,32        |
| ENSG00000142867 | BCL10       | 3,36     | 1,51        |
| ENSG00000198898 | CAPZA2      | 3,36     | 1,41        |
| ENSG00000023228 | NDUFS1      | 3,35     | 1,32        |
| ENSG00000155256 | ZFYVE27     | 3,35     | 1,40        |
| ENSG00000008324 | SS18L2      | 3,35     | 1,41        |
| ENSG00000069509 | FUNDC1      | 3,35     | 1,36        |
| ENSG00000131381 | RBSN        | 3,35     | 1,38        |
| ENSG00000182512 | GLRX5       | 3,35     | 1,41        |
| ENSG00000189030 | VHLL        | 3,34     | 1,24        |
| ENSG00000184945 | AQP12A      | 3,34     | 1,23        |
| ENSG00000253719 | ATXN7L3B    | 3,34     | 1,32        |
| ENSG00000149231 | CCDC82      | 3,34     | 1,43        |
| ENSG00000214819 | CDRT15L2    | 3,34     | 1,52        |
| ENSG00000179476 | C14orf28    | 3,34     | 1,56        |
| ENSG00000101132 | PFDN4       | 3,33     | 1,39        |
| ENSG00000181626 | ANKRD62     | 3,33     | 1,18        |
| ENSG00000177370 | TIMM22      | 3,33     | 1,38        |
| ENSG00000006451 | RALA        | 3,33     | 1,41        |
| ENSG00000001497 | LAS1L       | 3,33     | 1,21        |
| ENSG00000101972 | STAG2       | 3,33     | 1,45        |
| ENSG00000108671 | PSMD11      | 3,33     | 1,26        |

| ensembl gene    | gene symbol | Score(d) | Fold Change |
|-----------------|-------------|----------|-------------|
| ENSG00000060762 | MPC1        | 3,33     | 1,48        |
| ENSG00000132259 | CNGA4       | 3,33     | 1,24        |
| ENSG00000130045 | NXNL2       | 3,33     | 1,33        |
| ENSG00000157954 | WIP12       | 3,33     | 1,54        |
| ENSG00000067064 | IDI1        | 3,33     | 1,31        |
| ENSG00000143878 | RHOB        | 3,33     | 1,94        |
| ENSG00000082515 | MRPL22      | 3,32     | 1,45        |
| ENSG00000103044 | HAS3        | 3,32     | 1,24        |
| ENSG00000023892 | DEF6        | 3,32     | 1,51        |
| ENSG00000169762 | TAPT1       | 3,32     | 1,41        |
| ENSG00000159596 | TMEM69      | 3,32     | 1,60        |
| ENSG00000189164 | ZNF527      | 3,32     | 1,87        |
| ENSG00000153933 | DGKE        | 3,32     | 1,45        |
| ENSG00000102119 | EMD         | 3,32     | 1,43        |
| ENSG00000122085 | MTERF4      | 3,31     | 1,27        |
| ENSG00000169446 | MMGT1       | 3,31     | 1,36        |
| ENSG00000111445 | RFC5        | 3,31     | 1,70        |
| ENSG00000165512 | ZNF22       | 3,31     | 1,29        |
| ENSG00000110075 | PPP6R3      | 3,31     | 1,28        |
| ENSG00000196365 | LONP1       | 3,31     | 1,42        |
| ENSG00000136536 | 42801       | 3,31     | 1,43        |
| ENSG00000067829 | IDH3G       | 3,30     | 1,37        |
| ENSG00000173013 | CCDC96      | 3,30     | 1,19        |
| ENSG00000168890 | TMEM150A    | 3,30     | 1,37        |
| ENSG00000109255 | NMU         | 3,30     | 1,53        |
| ENSG00000088986 | DYNLL1      | 3,30     | 1,89        |
| ENSG00000149792 | MRPL49      | 3,30     | 1,39        |
| ENSG00000101361 | NOP56       | 3,30     | 1,37        |
| ENSG00000115761 | NOL10       | 3,30     | 1,40        |
| ENSG00000184381 | PLA2G6      | 3,30     | 1,39        |
| ENSG00000102001 | CACNA1F     | 3,30     | 1,49        |
| ENSG00000082512 | TRAF5       | 3,29     | 2,02        |
| ENSG00000169914 | OTUD3       | 3,29     | 1,50        |
| ENSG00000177954 | RPS27       | 3,29     | 1,50        |
| ENSG00000116514 | RNF19B      | 3,29     | 1,67        |
| ENSG00000150676 | CCDC83      | 3,29     | 1,30        |
| ENSG00000182899 | RPL35A      | 3,29     | 1,23        |
| ENSG00000213741 | RPS29       | 3,29     | 1,61        |
| ENSG00000185250 | PPIL6       | 3,29     | 1,77        |
| ENSG00000120798 | NR2C1       | 3,29     | 1,49        |
| ENSG00000156860 | FBR1        | 3,29     | 1,33        |
| ENSG00000198390 | KRTAP13-1   | 3,28     | 1,18        |
| ENSG00000229676 | ZNF492      | 3,28     | 1,23        |
| ENSG00000149923 | PPP4C       | 3,28     | 1,28        |
| ENSG00000103274 | NUBP1       | 3,28     | 1,41        |
| ENSG00000159259 | CHAF1B      | 3,28     | 1,94        |
| ENSG00000164919 | COX6C       | 3,28     | 1,45        |
| ENSG00000175105 | ZNF654      | 3,28     | 1,38        |
| ENSG00000100532 | CGRRF1      | 3,28     | 1,49        |



| ensembl gene    | gene symbol   | Score(d) | Fold Change |
|-----------------|---------------|----------|-------------|
| ENSG00000240065 | PSMB9         | 3,28     | 1,54        |
| ENSG00000134109 | EDEM1         | 3,27     | 1,51        |
| ENSG00000166889 | PATL1         | 3,27     | 1,40        |
| ENSG00000069329 | VPS35         | 3,27     | 1,47        |
| ENSG00000149150 | SLC43A1       | 3,27     | 1,81        |
| ENSG00000162972 | C2orf47       | 3,26     | 1,46        |
| ENSG00000105379 | ETFB          | 3,26     | 1,54        |
| ENSG00000197323 | TRIM33        | 3,26     | 1,51        |
| ENSG00000110063 | DCPS          | 3,26     | 1,45        |
| ENSG00000198836 | OPA1          | 3,26     | 1,44        |
| ENSG00000022277 | RTFDC1        | 3,26     | 1,34        |
| ENSG00000107959 | PITRM1        | 3,26     | 1,44        |
| ENSG00000111142 | METAP2        | 3,26     | 1,30        |
| ENSG00000160310 | PRMT2         | 3,26     | 1,43        |
| ENSG00000179299 | NSUN7         | 3,25     | 2,07        |
| ENSG00000034152 | MAP2K3        | 3,25     | 1,72        |
| ENSG00000111371 | SLC38A1       | 3,25     | 1,38        |
| ENSG00000234224 | TMEM229A      | 3,25     | 1,44        |
| ENSG00000108349 | CASC3         | 3,24     | 1,35        |
| ENSG00000095951 | HIVEP1        | 3,24     | 1,54        |
| ENSG00000116747 | TROVE2        | 3,24     | 1,56        |
| ENSG00000173264 | GPR137        | 3,24     | 1,27        |
| ENSG00000108582 | CPD           | 3,24     | 1,65        |
| ENSG00000111450 | STX2          | 3,24     | 1,68        |
| ENSG00000070950 | RAD18         | 3,24     | 1,51        |
| ENSG00000249141 | RP11-514O12.4 | 3,24     | 1,87        |
| ENSG00000117620 | SLC35A3       | 3,23     | 1,49        |
| ENSG00000110324 | IL10RA        | 3,23     | 2,70        |
| ENSG00000112306 | RPS12         | 3,23     | 1,89        |
| ENSG00000135114 | OASL          | 3,23     | 1,52        |
| ENSG00000164849 | GPR146        | 3,23     | 1,32        |
| ENSG00000134602 | STK26         | 3,23     | 1,43        |
| ENSG00000106052 | TAX1BP1       | 3,23     | 1,32        |
| ENSG00000160185 | UBASH3A       | 3,23     | 1,17        |
| ENSG00000164729 | SLC35G3       | 3,23     | 1,16        |
| ENSG00000198453 | ZNF568        | 3,23     | 1,48        |
| ENSG00000273540 | AGBL1         | 3,22     | 1,24        |
| ENSG00000180228 | PRKRA         | 3,22     | 1,37        |
| ENSG00000170369 | CST2          | 3,22     | 1,23        |
| ENSG00000171492 | LRRC8D        | 3,22     | 1,53        |
| ENSG00000161203 | AP2M1         | 3,22     | 1,45        |
| ENSG00000150593 | PDCD4         | 3,22     | 2,30        |
| ENSG00000170903 | MSANTD4       | 3,22     | 1,68        |
| ENSG00000196224 | KRTAP5-3      | 3,22     | 1,35        |
| ENSG00000163599 | CTLA4         | 3,22     | 1,64        |
| ENSG00000100473 | COCH          | 3,22     | 2,40        |
| ENSG00000143947 | RPS27A        | 3,21     | 1,87        |
| ENSG00000188807 | TMEM201       | 3,21     | 1,28        |
| ENSG00000185825 | BCAP31        | 3,21     | 1,29        |

| ensembl gene    | gene symbol | Score(d) | Fold Change |
|-----------------|-------------|----------|-------------|
| ENSG00000145901 | TNIP1       | 3,21     | 1,71        |
| ENSG00000087510 | TFAP2C      | 3,21     | 1,34        |
| ENSG00000072182 | ASIC4       | 3,21     | 1,17        |
| ENSG00000167106 | FAM102A     | 3,21     | 2,04        |
| ENSG00000177105 | RHOG        | 3,21     | 1,37        |
| ENSG00000197265 | GTF2E2      | 3,20     | 1,43        |
| ENSG00000196420 | S100A5      | 3,20     | 1,22        |
| ENSG00000162687 | KCNT2       | 3,20     | 1,66        |
| ENSG00000181264 | TMEM136     | 3,20     | 1,71        |
| ENSG00000109832 | DDX25       | 3,20     | 1,24        |
| ENSG00000008300 | CELSR3      | 3,20     | 1,23        |
| ENSG00000137574 | TGS1        | 3,20     | 1,30        |
| ENSG00000129187 | DCTD        | 3,19     | 1,30        |
| ENSG00000052802 | MSMO1       | 3,19     | 1,65        |
| ENSG00000151917 | BEND6       | 3,19     | 1,60        |
| ENSG00000105329 | TGFB1       | 3,19     | 1,58        |
| ENSG00000124783 | SSR1        | 3,19     | 1,28        |
| ENSG00000178860 | MSC         | 3,19     | 1,68        |
| ENSG00000138303 | ASCC1       | 3,19     | 1,63        |
| ENSG00000241258 | CRCP        | 3,19     | 1,36        |
| ENSG00000115241 | PPM1G       | 3,18     | 1,27        |
| ENSG00000125870 | SNRPB2      | 3,18     | 1,32        |
| ENSG00000212710 | CTAGE1      | 3,17     | 1,26        |
| ENSG00000047365 | ARAP2       | 3,17     | 2,16        |
| ENSG00000133055 | MYBPH       | 3,17     | 1,14        |
| ENSG00000147789 | ZNF7        | 3,17     | 1,29        |
| ENSG00000106025 | TSPAN12     | 3,17     | 1,43        |
| ENSG00000121022 | COPS5       | 3,17     | 1,42        |
| ENSG00000178950 | GAK         | 3,17     | 1,33        |
| ENSG00000152463 | OLAH        | 3,17     | 2,20        |
| ENSG00000136051 | KIAA1033    | 3,17     | 1,38        |
| ENSG00000149043 | SYT8        | 3,16     | 1,43        |
| ENSG00000260286 | C6orf229    | 3,16     | 1,22        |
| ENSG00000136504 | KAT7        | 3,16     | 1,38        |
| ENSG00000175305 | CCNE2       | 3,16     | 2,22        |
| ENSG00000106028 | SSBP1       | 3,16     | 1,38        |
| ENSG00000188707 | ZBED6CL     | 3,16     | 1,26        |
| ENSG00000100612 | DHRS7       | 3,16     | 1,48        |
| ENSG00000034053 | APBA2       | 3,16     | 2,03        |
| ENSG00000182372 | CLN8        | 3,15     | 1,69        |
| ENSG00000175550 | DRAP1       | 3,15     | 1,56        |
| ENSG00000133321 | RARRES3     | 3,15     | 2,13        |
| ENSG00000135655 | USP15       | 3,15     | 1,34        |
| ENSG00000168438 | CDC40       | 3,15     | 1,39        |
| ENSG00000037474 | NSUN2       | 3,15     | 1,50        |
| ENSG00000240230 | COX19       | 3,15     | 1,21        |
| ENSG00000187180 | LCE2C       | 3,15     | 1,30        |
| ENSG00000170619 | COMMD5      | 3,15     | 1,24        |
| ENSG00000114062 | UBE3A       | 3,15     | 1,28        |

| ensembl gene    | gene symbol | Score(d) | Fold Change |
|-----------------|-------------|----------|-------------|
| ENSG00000130881 | LRP3        | 3,15     | 1,27        |
| ENSG00000141668 | CBLN2       | 3,14     | 1,33        |
| ENSG00000071537 | SEL1L       | 3,14     | 1,49        |
| ENSG00000103671 | TRIP4       | 3,14     | 1,29        |
| ENSG00000169032 | MAP2K1      | 3,14     | 1,47        |
| ENSG00000214694 | ARHGEF33    | 3,14     | 1,36        |
| ENSG00000144895 | EIF2A       | 3,14     | 1,39        |
| ENSG00000173692 | PSMD1       | 3,14     | 1,25        |
| ENSG00000196378 | ZNF34       | 3,14     | 1,30        |
| ENSG00000130598 | TNNI2       | 3,14     | 1,23        |
| ENSG00000242259 | C22orf39    | 3,14     | 1,27        |
| ENSG00000165269 | AQP7        | 3,13     | 1,33        |
| ENSG00000172059 | KLF11       | 3,13     | 1,92        |
| ENSG00000014824 | SLC30A9     | 3,13     | 1,38        |
| ENSG00000095917 | TPSD1       | 3,13     | 1,22        |
| ENSG00000138802 | SEC24B      | 3,13     | 1,34        |
| ENSG00000107745 | MICU1       | 3,13     | 1,38        |
| ENSG00000182187 | CRYGB       | 3,13     | 1,25        |
| ENSG00000183569 | SERHL2      | 3,13     | 1,50        |
| ENSG00000019995 | ZRANB1      | 3,12     | 1,45        |
| ENSG00000100425 | BRD1        | 3,12     | 1,33        |
| ENSG00000160948 | VPS28       | 3,12     | 1,29        |
| ENSG00000143155 | TIPRL       | 3,12     | 1,41        |
| ENSG00000171503 | ETFDH       | 3,12     | 1,47        |
| ENSG00000167595 | PROSER3     | 3,12     | 1,22        |
| ENSG00000161031 | PGLYRP2     | 3,12     | 1,30        |
| ENSG00000105851 | PIK3CG      | 3,12     | 1,79        |
| ENSG00000135317 | SNX14       | 3,12     | 1,27        |
| ENSG00000100206 | DMC1        | 3,11     | 1,37        |
| ENSG00000100982 | PCIF1       | 3,11     | 1,39        |
| ENSG00000138182 | KIF20B      | 3,11     | 1,71        |
| ENSG00000132432 | SEC61G      | 3,11     | 1,47        |
| ENSG00000122359 | ANXA11      | 3,11     | 1,49        |
| ENSG00000147687 | TATDN1      | 3,11     | 1,63        |
| ENSG00000072786 | STK10       | 3,10     | 1,39        |
| ENSG00000154781 | CCDC174     | 3,10     | 1,31        |
| ENSG00000120254 | MTHFD1L     | 3,10     | 1,70        |
| ENSG00000077458 | FAM76B      | 3,10     | 1,74        |
| ENSG00000165194 | PCDH19      | 3,10     | 1,42        |
| ENSG00000156875 | MFSD14A     | 3,10     | 1,65        |
| ENSG00000129744 | ART1        | 3,10     | 1,42        |
| ENSG00000057757 | PITHD1      | 3,10     | 1,31        |
| ENSG00000122958 | VPS26A      | 3,10     | 1,32        |
| ENSG00000142784 | WDTC1       | 3,10     | 1,31        |
| ENSG00000078549 | ADCYAP1R1   | 3,10     | 1,14        |
| ENSG00000131437 | KIF3A       | 3,10     | 1,62        |
| ENSG00000011021 | CLCN6       | 3,10     | 1,61        |
| ENSG00000168795 | ZBTB5       | 3,09     | 1,37        |
| ENSG00000148481 | FAM188A     | 3,09     | 1,37        |

| ensembl gene    | gene symbol | Score(d) | Fold Change |
|-----------------|-------------|----------|-------------|
| ENSG00000130827 | PLXNA3      | 3,09     | 1,66        |
| ENSG00000106524 | ANKMY2      | 3,09     | 1,38        |
| ENSG00000093183 | SEC22C      | 3,09     | 1,34        |
| ENSG00000115484 | CCT4        | 3,09     | 1,40        |
| ENSG00000198034 | RPS4X       | 3,09     | 1,29        |
| ENSG00000170677 | SOCS6       | 3,09     | 1,54        |
| ENSG00000137073 | UBAP2       | 3,08     | 1,28        |
| ENSG00000132514 | CLEC10A     | 3,08     | 1,31        |
| ENSG00000124209 | RAB22A      | 3,08     | 1,43        |
| ENSG00000102054 | RBBP7       | 3,08     | 1,27        |
| ENSG00000187672 | ERC2        | 3,07     | 1,79        |
| ENSG00000080709 | KCNN2       | 3,07     | 1,35        |
| ENSG00000135241 | PNPLA8      | 3,07     | 1,64        |
| ENSG00000100393 | EP300       | 3,07     | 1,41        |
| ENSG00000206073 | SERPINB4    | 3,07     | 1,27        |
| ENSG00000132821 | VSTM2L      | 3,07     | 1,22        |
| ENSG00000124596 | OARD1       | 3,07     | 1,24        |
| ENSG00000198695 | MT-ND6      | 3,07     | 1,58        |
| ENSG00000081154 | PCNP        | 3,07     | 1,29        |
| ENSG00000163605 | PPP4R2      | 3,07     | 1,23        |
| ENSG00000185294 | SPPL2C      | 3,06     | 1,13        |
| ENSG00000109111 | SUPT6H      | 3,06     | 1,35        |
| ENSG00000213977 | TAX1BP3     | 3,06     | 1,60        |
| ENSG00000179636 | TPPP2       | 3,06     | 1,28        |
| ENSG00000088930 | XRN2        | 3,06     | 1,32        |
| ENSG00000143093 | STRIP1      | 3,06     | 1,40        |
| ENSG00000187840 | EIF4EBP1    | 3,06     | 1,89        |
| ENSG00000163412 | EIF4E3      | 3,06     | 1,39        |
| ENSG00000169994 | MYO7B       | 3,06     | 1,15        |
| ENSG00000175874 | CREG2       | 3,06     | 1,40        |
| ENSG00000115267 | IFIH1       | 3,05     | 1,76        |
| ENSG00000159692 | CTBP1       | 3,05     | 1,37        |
| ENSG00000105617 | LENG1       | 3,05     | 1,21        |
| ENSG00000103160 | HSDL1       | 3,05     | 1,71        |
| ENSG00000198171 | DDR GK1     | 3,05     | 1,39        |
| ENSG00000115129 | TP53I3      | 3,05     | 1,40        |
| ENSG00000114480 | GBE1        | 3,05     | 1,57        |
| ENSG00000106105 | GARS        | 3,05     | 1,52        |
| ENSG00000100258 | LMF2        | 3,05     | 1,34        |
| ENSG00000176281 | OR4K5       | 3,05     | 1,17        |
| ENSG00000062582 | MRPS24      | 3,05     | 1,52        |
| ENSG00000151247 | EIF4E       | 3,04     | 1,44        |
| ENSG00000173621 | LRFN4       | 3,04     | 1,21        |
| ENSG00000140694 | PARN        | 3,04     | 1,30        |
| ENSG00000127870 | RNF6        | 3,04     | 1,44        |
| ENSG00000110944 | IL23A       | 3,04     | 1,57        |
| ENSG00000213822 | CEACAM18    | 3,04     | 1,16        |
| ENSG00000113013 | HSPA9       | 3,04     | 1,31        |
| ENSG00000134996 | OSTF1       | 3,04     | 1,52        |

| ensembl gene    | gene symbol | Score(d) | Fold Change |
|-----------------|-------------|----------|-------------|
| ENSG00000109323 | MANBA       | 3,04     | 1,33        |
| ENSG00000176410 | DNAJC30     | 3,04     | 1,26        |
| ENSG00000163378 | EOGT        | 3,03     | 1,44        |
| ENSG00000112208 | BAG2        | 3,03     | 1,56        |
| ENSG00000101144 | BMP7        | 3,03     | 1,37        |
| ENSG00000158813 | EDA         | 3,03     | 1,63        |
| ENSG00000104331 | IMPAD1      | 3,03     | 1,30        |
| ENSG00000108239 | TBC1D12     | 3,02     | 1,43        |
| ENSG00000065911 | MTHFD2      | 3,02     | 1,57        |
| ENSG00000196437 | ZNF569      | 3,02     | 1,80        |
| ENSG00000111011 | RSRC2       | 3,02     | 1,31        |
| ENSG00000214706 | IFRD2       | 3,02     | 1,34        |
| ENSG00000135316 | SYNCRIP     | 3,02     | 1,21        |
| ENSG00000166295 | ANAPC16     | 3,01     | 1,28        |
| ENSG00000108061 | SHOC2       | 3,01     | 1,32        |
| ENSG00000174718 | KIAA1551    | 3,01     | 1,58        |
| ENSG00000196767 | POU3F4      | 3,01     | 1,17        |
| ENSG00000009954 | BAZ1B       | 3,01     | 1,24        |
| ENSG00000011590 | ZBTB32      | 3,01     | 1,36        |
| ENSG00000178826 | TMEM139     | 3,01     | 1,40        |
| ENSG00000095574 | IKZF5       | 3,00     | 1,42        |
| ENSG00000081307 | UBA5        | 3,00     | 1,35        |
| ENSG00000110243 | APOA5       | 3,00     | 1,15        |
| ENSG00000106605 | BLVRA       | 3,00     | 1,35        |
| ENSG00000166200 | COPS2       | 3,00     | 1,38        |
| ENSG00000164104 | HMGB2       | 3,00     | 1,54        |
| ENSG00000101197 | BIRC7       | 3,00     | 1,23        |
| ENSG00000165916 | PSMC3       | 3,00     | 1,34        |
| ENSG00000162885 | B3GALNT2    | 3,00     | 1,47        |
| ENSG00000075945 | KIFAP3      | 3,00     | 1,49        |
| ENSG00000169217 | CD2BP2      | 2,99     | 1,29        |
| ENSG00000157119 | KLHL40      | 2,99     | 1,19        |
| ENSG00000130707 | ASS1        | 2,99     | 2,51        |
| ENSG00000006062 | MAP3K14     | 2,99     | 1,60        |
| ENSG00000176783 | RUFY1       | 2,99     | 1,40        |
| ENSG00000127951 | FGL2        | 2,99     | 1,87        |
| ENSG00000114120 | SLC25A36    | 2,99     | 1,47        |
| ENSG00000116863 | ADPRHL2     | 2,99     | 1,25        |
| ENSG00000181499 | OR6T1       | 2,99     | 1,27        |
| ENSG00000168303 | MPLKIP      | 2,99     | 1,29        |
| ENSG00000166949 | SMAD3       | 2,99     | 1,61        |
| ENSG00000132017 | DCAF15      | 2,99     | 1,30        |
| ENSG00000164287 | CDC20B      | 2,99     | 1,18        |
| ENSG00000130023 | ERMARD      | 2,98     | 1,43        |
| ENSG00000196361 | ELAVL3      | 2,98     | 1,37        |
| ENSG00000110442 | COMMD9      | 2,98     | 1,30        |
| ENSG00000152936 | LMNTD1      | 2,98     | 1,32        |
| ENSG00000169379 | ARL13B      | 2,98     | 1,40        |
| ENSG00000100522 | GNPNAT1     | 2,98     | 1,64        |

| ensembl gene    | gene symbol | Score(d) | Fold Change |
|-----------------|-------------|----------|-------------|
| ENSG00000134962 | KLB         | 2,98     | 1,16        |
| ENSG00000103351 | CLUAP1      | 2,98     | 1,50        |
| ENSG00000128699 | ORMDL1      | 2,98     | 1,32        |
| ENSG00000056972 | TRAF3IP2    | 2,98     | 1,49        |
| ENSG00000175868 | CALCB       | 2,98     | 1,75        |
| ENSG00000186222 | BLOC1S4     | 2,97     | 1,24        |
| ENSG00000157502 | MUM1L1      | 2,97     | 1,22        |
| ENSG00000181804 | SLC9A9      | 2,97     | 1,84        |
| ENSG00000160161 | CILP2       | 2,97     | 1,26        |
| ENSG00000126460 | PRRG2       | 2,97     | 1,16        |
| ENSG00000139620 | KANSL2      | 2,97     | 1,32        |
| ENSG00000180233 | ZNRF2       | 2,97     | 1,31        |
| ENSG00000134597 | RBMX2       | 2,97     | 1,33        |
| ENSG00000114316 | USP4        | 2,97     | 1,21        |
| ENSG00000179873 | NLRP11      | 2,97     | 1,64        |
| ENSG00000171858 | RPS21       | 2,96     | 1,65        |
| ENSG00000187994 | RINL        | 2,96     | 1,23        |
| ENSG00000159961 | OR3A3       | 2,96     | 1,27        |
| ENSG00000105053 | VRK3        | 2,96     | 1,44        |
| ENSG00000205186 | FABP9       | 2,96     | 1,16        |
| ENSG00000147852 | VLDLR       | 2,96     | 1,63        |
| ENSG00000174004 | NRROS       | 2,96     | 1,66        |
| ENSG00000115183 | TANC1       | 2,96     | 1,89        |
| ENSG00000204595 | DPRX        | 2,96     | 1,18        |
| ENSG00000137713 | PPP2R1B     | 2,96     | 1,41        |
| ENSG00000130779 | CLIP1       | 2,96     | 1,51        |
| ENSG00000102078 | SLC25A14    | 2,96     | 1,37        |
| ENSG00000147224 | PRPS1       | 2,96     | 1,29        |
| ENSG00000165521 | EML5        | 2,96     | 1,65        |
| ENSG00000104885 | DOT1L       | 2,96     | 1,32        |
| ENSG00000156482 | RPL30       | 2,96     | 1,59        |
| ENSG00000065809 | FAM107B     | 2,96     | 2,52        |
| ENSG00000170310 | STX8        | 2,95     | 1,32        |
| ENSG00000113407 | TARS        | 2,95     | 1,44        |
| ENSG00000198521 | ZNF43       | 2,95     | 1,78        |
| ENSG00000236279 | CLEC2L      | 2,95     | 1,29        |
| ENSG00000132463 | GRSF1       | 2,95     | 1,30        |
| ENSG00000101343 | CRNKL1      | 2,95     | 1,29        |
| ENSG00000089225 | TBX5        | 2,95     | 1,16        |
| ENSG00000066557 | LRRC40      | 2,94     | 1,46        |
| ENSG00000026025 | VIM         | 2,94     | 1,37        |
| ENSG00000099960 | SLC7A4      | 2,94     | 1,17        |
| ENSG00000162923 | WDR26       | 2,94     | 1,58        |
| ENSG00000174780 | SRP72       | 2,94     | 1,22        |
| ENSG00000094841 | UPRT        | 2,94     | 1,27        |
| ENSG00000023287 | RB1CC1      | 2,94     | 1,56        |
| ENSG00000180776 | ZDHHC20     | 2,94     | 1,52        |
| ENSG00000159648 | TEPP        | 2,94     | 1,24        |
| ENSG00000147724 | FAM135B     | 2,94     | 1,38        |

| ensembl gene    | gene symbol | Score(d) | Fold Change |
|-----------------|-------------|----------|-------------|
| ENSG00000168209 | DDIT4       | 2,94     | 1,92        |
| ENSG00000179094 | PER1        | 2,94     | 1,92        |
| ENSG00000078808 | SDF4        | 2,93     | 1,32        |
| ENSG00000185359 | HGS         | 2,93     | 1,34        |
| ENSG00000222047 | C10orf55    | 2,93     | 1,19        |
| ENSG00000121905 | HPCA        | 2,93     | 1,32        |
| ENSG00000164120 | HPGD        | 2,93     | 1,44        |
| ENSG00000204899 | MZT1        | 2,93     | 1,37        |
| ENSG00000133401 | PDZD2       | 2,93     | 1,48        |
| ENSG00000152133 | GPATCH11    | 2,93     | 1,36        |
| ENSG00000129515 | SNX6        | 2,93     | 1,37        |
| ENSG00000041802 | LSG1        | 2,93     | 1,30        |
| ENSG00000136463 | TACO1       | 2,93     | 1,27        |
| ENSG00000167384 | ZNF180      | 2,93     | 1,36        |
| ENSG00000077264 | PAK3        | 2,93     | 1,32        |
| ENSG00000120458 | MSANTD2     | 2,92     | 1,32        |
| ENSG00000171368 | TPPP        | 2,92     | 1,28        |
| ENSG00000185721 | DRG1        | 2,92     | 1,40        |
| ENSG00000169155 | ZBTB43      | 2,92     | 1,36        |
| ENSG00000115839 | RAB3GAP1    | 2,92     | 1,27        |
| ENSG00000268223 | ARL14EPL    | 2,92     | 1,20        |
| ENSG00000117625 | RCOR3       | 2,92     | 1,45        |
| ENSG00000182329 | KIAA2012    | 2,92     | 1,44        |
| ENSG00000170893 | TRH         | 2,92     | 1,18        |
| ENSG00000131725 | WDR44       | 2,92     | 1,48        |
| ENSG00000111885 | MAN1A1      | 2,91     | 1,47        |
| ENSG00000164941 | INTS8       | 2,91     | 1,25        |
| ENSG00000188730 | VWC2        | 2,91     | 1,38        |
| ENSG00000017260 | ATP2C1      | 2,91     | 1,37        |
| ENSG00000129292 | PHF20L1     | 2,91     | 1,24        |
| ENSG00000164038 | SLC9B2      | 2,91     | 1,50        |
| ENSG00000100478 | AP4S1       | 2,91     | 1,47        |
| ENSG00000102081 | FMR1        | 2,91     | 1,50        |
| ENSG00000065883 | CDK13       | 2,91     | 1,31        |
| ENSG00000106336 | FBXO24      | 2,91     | 1,24        |
| ENSG00000033030 | ZCCHC8      | 2,90     | 1,40        |
| ENSG00000133256 | PDE6B       | 2,90     | 1,22        |
| ENSG00000092439 | TRPM7       | 2,90     | 1,31        |
| ENSG00000167536 | DHRS13      | 2,90     | 1,46        |
| ENSG00000198839 | ZNF277      | 2,90     | 1,33        |
| ENSG00000112218 | GPR63       | 2,90     | 2,27        |
| ENSG00000214860 | EVPLL       | 2,90     | 1,30        |
| ENSG00000134028 | ADAMDEC1    | 2,90     | 1,44        |
| ENSG00000143702 | CEP170      | 2,90     | 1,41        |
| ENSG00000087274 | ADD1        | 2,90     | 1,31        |
| ENSG00000124659 | TBCC        | 2,90     | 1,29        |
| ENSG00000122884 | P4HA1       | 2,89     | 1,95        |
| ENSG00000179387 | ELMOD2      | 2,89     | 1,34        |
| ENSG00000158411 | MITD1       | 2,89     | 1,36        |

| ensembl gene    | gene symbol | Score(d) | Fold Change |
|-----------------|-------------|----------|-------------|
| ENSG00000153975 | ZUFSP       | 2,89     | 1,85        |
| ENSG00000135052 | GOLM1       | 2,89     | 2,13        |
| ENSG00000105642 | KCNN1       | 2,89     | 1,28        |
| ENSG00000109424 | UCP1        | 2,89     | 1,15        |
| ENSG00000102218 | RP2         | 2,89     | 1,47        |
| ENSG00000204308 | RNF5        | 2,89     | 1,28        |
| ENSG00000181472 | ZBTB2       | 2,89     | 1,47        |
| ENSG00000213799 | ZNF845      | 2,89     | 1,39        |
| ENSG00000105258 | POLR2I      | 2,88     | 1,31        |
| ENSG00000140299 | BNIP2       | 2,88     | 1,28        |
| ENSG00000102317 | RBM3        | 2,88     | 1,26        |
| ENSG00000127241 | MASP1       | 2,88     | 1,36        |
| ENSG00000099949 | LZTR1       | 2,88     | 1,24        |
| ENSG00000085449 | WDFY1       | 2,88     | 1,47        |
| ENSG00000170191 | NANP        | 2,88     | 1,25        |
| ENSG00000204160 | ZDHHC18     | 2,88     | 1,46        |
| ENSG00000170653 | ATF7        | 2,88     | 1,53        |
| ENSG00000101546 | RBFA        | 2,88     | 1,43        |
| ENSG00000197860 | SGTB        | 2,88     | 1,80        |
| ENSG00000141429 | GALNT1      | 2,88     | 1,56        |
| ENSG00000068120 | COASY       | 2,88     | 1,28        |
| ENSG00000026103 | FAS         | 2,88     | 2,14        |
| ENSG00000137825 | ITPKA       | 2,87     | 1,18        |
| ENSG00000065665 | SEC61A2     | 2,87     | 1,63        |
| ENSG00000134668 | SPOCD1      | 2,87     | 1,16        |
| ENSG00000173418 | NAA20       | 2,87     | 1,31        |
| ENSG00000239605 | C2orf61     | 2,87     | 1,24        |
| ENSG00000171931 | FBXW10      | 2,87     | 1,23        |
| ENSG00000070193 | FGF10       | 2,87     | 1,20        |
| ENSG00000108523 | RNF167      | 2,87     | 1,29        |
| ENSG00000134317 | GRHL1       | 2,87     | 1,39        |
| ENSG00000136697 | IL1F10      | 2,87     | 1,17        |
| ENSG00000136738 | STAM        | 2,87     | 1,43        |
| ENSG00000172073 | TEX37       | 2,87     | 1,16        |
| ENSG00000137500 | CCDC90B     | 2,86     | 1,28        |
| ENSG00000178965 | ERICH3      | 2,86     | 1,33        |
| ENSG00000176171 | BNIP3       | 2,86     | 2,38        |
| ENSG00000154529 | CNTNAP3B    | 2,86     | 1,27        |
| ENSG00000153113 | CAST        | 2,86     | 1,27        |
| ENSG00000104714 | ERICH1      | 2,86     | 1,41        |
| ENSG00000117500 | TMED5       | 2,86     | 1,30        |
| ENSG00000163218 | PGLYRP4     | 2,86     | 1,34        |
| ENSG00000108828 | VAT1        | 2,86     | 1,39        |
| ENSG00000122042 | UBL3        | 2,86     | 1,62        |
| ENSG00000145975 | FAM217A     | 2,86     | 1,27        |
| ENSG00000141391 | PRELID3A    | 2,85     | 1,19        |
| ENSG00000139160 | ETFBKMT     | 2,85     | 1,50        |
| ENSG00000115944 | COX7A2L     | 2,85     | 1,42        |
| ENSG00000151726 | ACSL1       | 2,85     | 1,83        |



| ensembl gene    | gene symbol | Score(d) | Fold Change |
|-----------------|-------------|----------|-------------|
| ENSG00000164128 | NPY1R       | 2,85     | 1,34        |
| ENSG00000151778 | SERP2       | 2,85     | 1,34        |
| ENSG00000186141 | POLR3C      | 2,85     | 1,35        |
| ENSG00000164076 | CAMKV       | 2,85     | 1,16        |
| ENSG00000221963 | APOL6       | 2,85     | 1,48        |
| ENSG00000128165 | ADM2        | 2,85     | 1,28        |
| ENSG00000204315 | FKBPL       | 2,85     | 1,19        |
| ENSG00000170486 | KRT72       | 2,85     | 1,29        |
| ENSG00000091583 | APOH        | 2,84     | 1,79        |
| ENSG00000132530 | XAF1        | 2,84     | 1,98        |
| ENSG00000100304 | TTLL12      | 2,84     | 1,31        |
| ENSG00000168061 | SAC3D1      | 2,84     | 1,19        |
| ENSG00000186868 | MAPT        | 2,84     | 1,18        |
| ENSG00000172809 | RPL38       | 2,84     | 1,39        |
| ENSG00000107937 | GTPBP4      | 2,84     | 1,37        |
| ENSG00000108094 | CUL2        | 2,84     | 1,25        |
| ENSG00000163320 | CGGBP1      | 2,84     | 1,20        |
| ENSG00000147432 | CHRNA3      | 2,84     | 1,20        |
| ENSG00000100220 | RTCB        | 2,84     | 1,71        |
| ENSG00000165219 | GAPVD1      | 2,83     | 1,24        |
| ENSG00000152270 | PDE3B       | 2,83     | 2,63        |
| ENSG00000175073 | VCPIP1      | 2,83     | 1,29        |
| ENSG00000116704 | SLC35D1     | 2,83     | 1,41        |
| ENSG00000106089 | STX1A       | 2,83     | 1,37        |
| ENSG00000107105 | ELAVL2      | 2,83     | 1,33        |
| ENSG00000139044 | B4GALNT3    | 2,83     | 1,25        |
| ENSG00000265763 | ZNF488      | 2,83     | 1,22        |
| ENSG00000157106 | SMG1        | 2,83     | 1,35        |
| ENSG00000222014 | RAB6C       | 2,82     | 1,25        |
| ENSG00000103023 | PRSS54      | 2,82     | 1,16        |
| ENSG00000123684 | LPGAT1      | 2,82     | 1,59        |
| ENSG00000100325 | ASCC2       | 2,82     | 1,28        |
| ENSG00000062485 | CS          | 2,82     | 1,27        |
| ENSG00000158786 | PLA2G2F     | 2,82     | 1,19        |
| ENSG00000173960 | UBXN2A      | 2,82     | 1,36        |
| ENSG00000105668 | UPK1A       | 2,82     | 1,15        |
| ENSG00000080189 | SLC35C2     | 2,82     | 1,24        |
| ENSG00000004478 | FKBP4       | 2,82     | 1,24        |
| ENSG00000055332 | EIF2AK2     | 2,82     | 1,50        |
| ENSG00000101782 | RIOK3       | 2,82     | 1,45        |
| ENSG00000058272 | PPP1R12A    | 2,82     | 1,41        |
| ENSG00000165684 | SNAPC4      | 2,82     | 1,27        |
| ENSG00000122299 | ZC3H7A      | 2,81     | 1,36        |
| ENSG00000257727 | CNPY2       | 2,81     | 1,38        |
| ENSG00000104825 | NFKBIB      | 2,81     | 1,32        |
| ENSG00000112110 | MRPL18      | 2,81     | 1,37        |
| ENSG00000105619 | TFPT        | 2,81     | 1,30        |
| ENSG00000172687 | ZNF738      | 2,81     | 1,54        |
| ENSG00000240694 | PNMA2       | 2,81     | 1,20        |

| ensembl gene    | gene symbol | Score(d) | Fold Change |
|-----------------|-------------|----------|-------------|
| ENSG00000162654 | GBP4        | 2,81     | 2,47        |
| ENSG00000089220 | PEBP1       | 2,81     | 1,62        |
| ENSG00000166888 | STAT6       | 2,80     | 1,39        |
| ENSG00000140067 | FAM181A     | 2,80     | 1,26        |
| ENSG00000108064 | TFAM        | 2,80     | 1,27        |
| ENSG00000176946 | THAP4       | 2,80     | 1,33        |
| ENSG00000173218 | VANGL1      | 2,80     | 1,52        |
| ENSG00000110696 | C11orf58    | 2,80     | 1,24        |
| ENSG00000115963 | RND3        | 2,80     | 3,17        |
| ENSG00000141522 | ARHGDIA     | 2,80     | 1,24        |
| ENSG00000179059 | ZFP42       | 2,80     | 1,23        |
| ENSG00000104689 | TNFRSF10A   | 2,79     | 1,46        |
| ENSG00000155511 | GRIA1       | 2,79     | 1,78        |
| ENSG00000090273 | NUDC        | 2,79     | 1,28        |
| ENSG00000166984 | TCP10L2     | 2,79     | 1,19        |
| ENSG00000178226 | PRSS36      | 2,79     | 1,31        |
| ENSG00000240021 | TEX35       | 2,79     | 1,55        |
| ENSG00000101109 | STK4        | 2,79     | 1,32        |
| ENSG00000269556 | TMEM185A    | 2,79     | 1,34        |
| ENSG00000198848 | CES1        | 2,79     | 1,27        |
| ENSG00000117868 | ESYT2       | 2,78     | 1,33        |
| ENSG00000138594 | TMOD3       | 2,78     | 1,25        |
| ENSG00000185347 | C14orf80    | 2,78     | 1,24        |
| ENSG00000151465 | CDC123      | 2,78     | 1,25        |
| ENSG00000187189 | TSPYL4      | 2,78     | 1,33        |
| ENSG00000124103 | FAM209A     | 2,78     | 1,48        |
| ENSG00000198746 | GPATCH3     | 2,78     | 1,18        |
| ENSG00000160211 | G6PD        | 2,78     | 1,35        |
| ENSG00000169756 | LIMS1       | 2,78     | 1,35        |
| ENSG00000116761 | CTH         | 2,78     | 2,06        |
| ENSG00000143674 | RP5-862P8.2 | 2,78     | 1,59        |
| ENSG00000082438 | COBLL1      | 2,78     | 1,63        |
| ENSG00000175520 | UBQLN3      | 2,78     | 1,34        |
| ENSG00000170322 | NFRKB       | 2,78     | 1,34        |
| ENSG00000142327 | RNPEPL1     | 2,78     | 1,37        |
| ENSG00000170477 | KRT4        | 2,78     | 1,22        |
| ENSG00000068354 | TBC1D25     | 2,78     | 1,25        |
| ENSG00000101161 | PRPF6       | 2,77     | 1,19        |
| ENSG00000169410 | PTPN9       | 2,77     | 1,28        |
| ENSG00000196498 | NCOR2       | 2,77     | 1,35        |
| ENSG00000173349 | SFT2D3      | 2,77     | 1,20        |
| ENSG00000189186 | DCAF8L2     | 2,77     | 1,34        |
| ENSG00000215274 | GAGE10      | 2,77     | 1,24        |
| ENSG00000197386 | HTT         | 2,77     | 1,34        |
| ENSG00000122490 | PQLC1       | 2,77     | 1,37        |
| ENSG00000169504 | CLIC4       | 2,77     | 1,39        |
| ENSG00000198455 | ZXDB        | 2,77     | 1,43        |
| ENSG00000186407 | CD300E      | 2,77     | 1,29        |
| ENSG00000177551 | NHLH2       | 2,77     | 1,16        |

| ensembl gene    | gene symbol | Score(d) | Fold Change |
|-----------------|-------------|----------|-------------|
| ENSG00000136628 | EPRS        | 2,77     | 1,31        |
| ENSG00000186314 | PRELID2     | 2,77     | 1,47        |
| ENSG00000198625 | MDM4        | 2,77     | 1,33        |
| ENSG00000162434 | JAK1        | 2,77     | 1,36        |
| ENSG00000144655 | CSRNP1      | 2,76     | 1,57        |
| ENSG00000075785 | RAB7A       | 2,76     | 1,16        |
| ENSG00000155313 | USP25       | 2,76     | 1,50        |
| ENSG00000105700 | KXD1        | 2,76     | 1,23        |
| ENSG00000153914 | SREK1       | 2,76     | 1,22        |
| ENSG00000144381 | HSPD1       | 2,76     | 1,33        |
| ENSG00000134247 | PTGFRN      | 2,76     | 1,59        |
| ENSG00000186335 | SLC36A2     | 2,76     | 1,24        |
| ENSG00000141552 | ANAPC11     | 2,76     | 1,28        |
| ENSG00000179674 | ARL14       | 2,76     | 1,18        |
| ENSG00000183379 | SYNDIG1L    | 2,76     | 1,18        |
| ENSG00000186930 | KRTAP6-2    | 2,75     | 1,19        |
| ENSG00000108219 | TSPAN14     | 2,75     | 1,55        |
| ENSG00000060982 | BCAT1       | 2,75     | 1,96        |
| ENSG00000118503 | TNFAIP3     | 2,75     | 1,89        |
| ENSG00000107949 | BCCIP       | 2,75     | 1,39        |
| ENSG00000118513 | MYB         | 2,75     | 2,20        |
| ENSG00000165943 | MOAP1       | 2,75     | 1,23        |
| ENSG00000103257 | SLC7A5      | 2,75     | 1,80        |
| ENSG00000106049 | HIBADH      | 2,75     | 1,31        |
| ENSG00000081721 | DUSP12      | 2,75     | 1,41        |
| ENSG00000138750 | NUP54       | 2,75     | 1,31        |
| ENSG00000183696 | UPP1        | 2,74     | 1,39        |
| ENSG00000087053 | MTMR2       | 2,74     | 1,39        |
| ENSG00000165516 | KLHDC2      | 2,74     | 1,37        |
| ENSG00000243056 | EIF4EBP3    | 2,74     | 1,52        |
| ENSG00000234545 | FAM133B     | 2,74     | 1,37        |
| ENSG00000124787 | RPP40       | 2,74     | 1,80        |
| ENSG00000166135 | HIF1AN      | 2,74     | 1,28        |
| ENSG00000111877 | MCM9        | 2,74     | 1,35        |
| ENSG00000147180 | ZNF711      | 2,74     | 1,85        |
| ENSG00000085511 | MAP3K4      | 2,74     | 1,36        |
| ENSG00000196900 | TEX43       | 2,74     | 1,19        |
| ENSG00000205442 | IZUMO3      | 2,74     | 1,16        |
| ENSG00000197343 | ZNF655      | 2,74     | 1,39        |
| ENSG00000162545 | CAMK2N1     | 2,73     | 1,19        |
| ENSG00000198768 | APCDD1L     | 2,73     | 1,30        |
| ENSG00000066455 | GOLGA5      | 2,73     | 1,39        |
| ENSG00000147381 | MAGEA4      | 2,73     | 1,30        |
| ENSG00000124564 | SLC17A3     | 2,73     | 1,16        |
| ENSG00000144118 | RALB        | 2,73     | 1,25        |
| ENSG00000244165 | P2RY11      | 2,73     | 1,50        |
| ENSG00000130813 | C19orf66    | 2,73     | 1,29        |
| ENSG00000111237 | VPS29       | 2,73     | 1,27        |
| ENSG00000168476 | REEP4       | 2,73     | 1,36        |

| ensembl gene    | gene symbol | Score(d) | Fold Change |
|-----------------|-------------|----------|-------------|
| ENSG00000089041 | P2RX7       | 2,73     | 2,16        |
| ENSG00000162129 | CLPB        | 2,73     | 1,28        |
| ENSG00000118156 | ZNF541      | 2,72     | 1,15        |
| ENSG00000225526 | MKRN2OS     | 2,72     | 1,16        |
| ENSG00000102401 | ARMCX3      | 2,72     | 1,27        |
| ENSG00000147601 | TERF1       | 2,72     | 1,38        |
| ENSG00000141378 | PTRH2       | 2,72     | 1,36        |
| ENSG00000168612 | ZSWIM1      | 2,72     | 1,27        |
| ENSG00000239474 | KLHL41      | 2,72     | 1,39        |
| ENSG00000176435 | CLEC14A     | 2,72     | 1,22        |
| ENSG00000167461 | RAB8A       | 2,72     | 1,33        |
| ENSG00000180209 | MYLPF       | 2,72     | 1,16        |
| ENSG00000181852 | RNF41       | 2,72     | 1,31        |
| ENSG00000112651 | MRPL2       | 2,72     | 1,33        |
| ENSG00000215375 | MYL5        | 2,72     | 1,21        |
| ENSG00000183828 | NUDT14      | 2,72     | 1,23        |
| ENSG00000137818 | RPLP1       | 2,72     | 1,42        |
| ENSG00000100483 | VCPKMT      | 2,71     | 1,46        |
| ENSG00000060491 | OGFR        | 2,71     | 1,35        |
| ENSG00000042429 | MED17       | 2,71     | 1,31        |
| ENSG00000154451 | GBP5        | 2,71     | 2,20        |
| ENSG00000188488 | SERPINA5    | 2,71     | 1,21        |
| ENSG00000071242 | RPS6KA2     | 2,71     | 1,86        |
| ENSG00000145337 | PYURF       | 2,71     | 1,30        |
| ENSG00000163918 | RFC4        | 2,71     | 1,49        |
| ENSG00000116688 | MFN2        | 2,71     | 1,23        |
| ENSG00000196507 | TCEAL3      | 2,71     | 1,13        |
| ENSG00000234127 | TRIM26      | 2,71     | 1,26        |
| ENSG00000163344 | PMVK        | 2,71     | 1,46        |
| ENSG00000066654 | THUMPD1     | 2,70     | 1,30        |
| ENSG00000165917 | RAPSN       | 2,70     | 1,18        |
| ENSG00000138018 | EPT1        | 2,70     | 1,25        |
| ENSG00000092820 | EZR         | 2,70     | 1,36        |
| ENSG00000139233 | LLPH        | 2,70     | 1,24        |
| ENSG00000019169 | MARCO       | 2,70     | 1,27        |
| ENSG00000179918 | SEPHS2      | 2,70     | 1,30        |
| ENSG00000100335 | MIEF1       | 2,70     | 1,34        |
| ENSG00000172594 | SMPDL3A     | 2,70     | 1,62        |
| ENSG00000186838 | SELV        | 2,70     | 1,13        |
| ENSG00000060566 | CREB3L3     | 2,70     | 1,12        |
| ENSG00000107438 | PDLIM1      | 2,70     | 1,53        |
| ENSG00000032219 | ARID4A      | 2,70     | 1,82        |
| ENSG00000086619 | ERO1B       | 2,70     | 1,45        |
| ENSG00000165525 | NEMF        | 2,70     | 1,30        |
| ENSG00000121766 | ZCCHC17     | 2,69     | 1,28        |
| ENSG00000124216 | SNAI1       | 2,69     | 1,31        |
| ENSG00000151552 | QDPR        | 2,69     | 1,31        |
| ENSG00000112249 | ASCC3       | 2,69     | 1,46        |
| ENSG00000164828 | SUN1        | 2,69     | 1,36        |

| ensembl gene    | gene symbol | Score(d) | Fold Change |
|-----------------|-------------|----------|-------------|
| ENSG00000161896 | IP6K3       | 2,69     | 1,26        |
| ENSG00000070718 | AP3M2       | 2,69     | 1,39        |
| ENSG00000096384 | HSP90AB1    | 2,69     | 1,39        |
| ENSG00000135521 | LTV1        | 2,69     | 1,44        |
| ENSG00000140105 | WARS        | 2,69     | 1,63        |
| ENSG00000141437 | SLC25A52    | 2,69     | 1,20        |
| ENSG00000109536 | FRG1        | 2,69     | 1,47        |
| ENSG00000170967 | DDI1        | 2,69     | 1,16        |
| ENSG00000110619 | CARS        | 2,69     | 1,40        |
| ENSG00000139973 | SYT16       | 2,69     | 1,18        |
| ENSG00000179632 | MAF1        | 2,69     | 1,31        |
| ENSG00000112715 | VEGFA       | 2,69     | 1,58        |
| ENSG00000140511 | HAPLN3      | 2,69     | 1,60        |
| ENSG00000096717 | SIRT1       | 2,69     | 1,34        |
| ENSG00000109332 | UBE2D3      | 2,69     | 1,29        |
| ENSG00000180353 | HCLS1       | 2,69     | 1,31        |
| ENSG00000149488 | TMC2        | 2,69     | 1,19        |
| ENSG00000119820 | YIPF4       | 2,68     | 1,34        |
| ENSG00000228607 | CLDN25      | 2,68     | 1,17        |
| ENSG00000173769 | TOPAZ1      | 2,68     | 1,10        |
| ENSG00000074211 | PPP2R2C     | 2,68     | 1,20        |
| ENSG00000172939 | OXSRI       | 2,68     | 1,31        |
| ENSG00000178586 | OR6B3       | 2,68     | 1,20        |
| ENSG00000184394 | OR4N5       | 2,68     | 1,20        |
| ENSG00000168259 | DNAJC7      | 2,68     | 1,26        |
| ENSG00000106299 | WASL        | 2,68     | 1,36        |
| ENSG00000147874 | HAUS6       | 2,68     | 1,32        |
| ENSG00000189046 | ALKBH2      | 2,68     | 1,40        |
| ENSG00000100426 | ZBED4       | 2,68     | 1,20        |
| ENSG00000153767 | GTF2E1      | 2,68     | 1,33        |
| ENSG00000116586 | LAMTOR2     | 2,68     | 1,29        |
| ENSG00000141873 | SLC39A3     | 2,68     | 1,72        |
| ENSG00000178425 | NT5DC1      | 2,68     | 1,59        |
| ENSG00000000938 | FGR         | 2,68     | 1,28        |
| ENSG00000119048 | UBE2B       | 2,68     | 1,44        |
| ENSG00000129473 | BCL2L2      | 2,68     | 1,42        |
| ENSG00000113810 | SMC4        | 2,68     | 1,46        |
| ENSG00000141027 | NCOR1       | 2,68     | 1,25        |
| ENSG00000161960 | EIF4A1      | 2,68     | 1,66        |
| ENSG00000204370 | SDHD        | 2,67     | 1,50        |
| ENSG00000173557 | C2orf70     | 2,67     | 1,17        |
| ENSG00000249751 | ECSCR       | 2,67     | 1,17        |
| ENSG00000104879 | CKM         | 2,67     | 1,17        |
| ENSG00000203950 | FAM127B     | 2,67     | 1,34        |
| ENSG00000103549 | RNF40       | 2,66     | 1,24        |
| ENSG00000101654 | RNMT        | 2,66     | 1,56        |
| ENSG00000182973 | CNOT10      | 2,66     | 1,43        |
| ENSG00000107938 | EDRF1       | 2,66     | 1,31        |
| ENSG00000043093 | DCUN1D1     | 2,66     | 1,33        |

| ensembl gene    | gene symbol | Score(d) | Fold Change |
|-----------------|-------------|----------|-------------|
| ENSG00000127399 | LRRC61      | 2,66     | 1,22        |
| ENSG00000130640 | TUBGCP2     | 2,66     | 1,17        |
| ENSG00000109046 | WSB1        | 2,66     | 1,38        |
| ENSG00000104805 | NUCB1       | 2,66     | 1,31        |
| ENSG00000054267 | ARID4B      | 2,66     | 1,44        |
| ENSG00000170689 | HOXB9       | 2,66     | 1,23        |
| ENSG00000188725 | SMIM15      | 2,66     | 1,22        |
| ENSG00000134440 | NARS        | 2,66     | 1,28        |
| ENSG00000111647 | UHRF1BP1L   | 2,66     | 1,41        |
| ENSG00000204161 | C10orf128   | 2,65     | 1,39        |
| ENSG00000176624 | MEX3C       | 2,65     | 1,37        |
| ENSG00000125484 | GTF3C4      | 2,65     | 1,30        |
| ENSG00000233412 | OR5H15      | 2,65     | 1,19        |
| ENSG00000142089 | IFITM3      | 2,65     | 1,85        |
| ENSG00000090013 | BLVRB       | 2,65     | 1,45        |
| ENSG00000011523 | CEP68       | 2,65     | 1,43        |
| ENSG00000065613 | SLK         | 2,65     | 1,46        |
| ENSG00000235942 | LCE6A       | 2,65     | 1,11        |
| ENSG00000166441 | RPL27A      | 2,65     | 1,39        |
| ENSG00000110700 | RPS13       | 2,65     | 1,32        |
| ENSG00000156802 | ATAD2       | 2,65     | 1,74        |
| ENSG00000139668 | WDFY2       | 2,65     | 1,29        |
| ENSG00000125249 | RAP2A       | 2,65     | 1,63        |
| ENSG00000092148 | HECTD1      | 2,65     | 1,27        |
| ENSG00000090432 | MUL1        | 2,65     | 1,32        |
| ENSG00000144736 | SHQ1        | 2,65     | 1,38        |
| ENSG00000161011 | SQSTM1      | 2,64     | 1,32        |
| ENSG00000100442 | FKBP3       | 2,64     | 1,49        |
| ENSG00000105699 | LSR         | 2,64     | 1,31        |
| ENSG00000102032 | RENBP       | 2,64     | 1,16        |
| ENSG00000170540 | ARL6IP1     | 2,64     | 1,37        |
| ENSG00000122971 | ACADS       | 2,64     | 1,16        |
| ENSG00000072506 | HSD17B10    | 2,64     | 1,33        |
| ENSG00000186509 | OR9Q1       | 2,64     | 1,21        |
| ENSG00000139278 | GLIPR1      | 2,64     | 1,96        |
| ENSG00000258713 | C20orf141   | 2,64     | 1,26        |
| ENSG00000002822 | MAD1L1      | 2,64     | 1,27        |
| ENSG00000126067 | PSMB2       | 2,64     | 1,23        |
| ENSG00000138069 | RAB1A       | 2,64     | 1,22        |
| ENSG00000168672 | FAM84B      | 2,64     | 2,77        |
| ENSG00000172500 | FIBP        | 2,64     | 1,32        |
| ENSG00000205857 | NANOGNB     | 2,64     | 1,18        |
| ENSG00000006659 | LGALS14     | 2,63     | 3,06        |
| ENSG00000116350 | SRSF4       | 2,63     | 1,24        |
| ENSG00000164089 | ETNPPL      | 2,63     | 1,12        |
| ENSG00000122376 | FAM35A      | 2,63     | 1,35        |
| ENSG00000126903 | SLC10A3     | 2,63     | 1,23        |
| ENSG00000117410 | ATP6V0B     | 2,63     | 1,29        |
| ENSG00000004059 | ARF5        | 2,62     | 1,31        |

| ensembl gene    | gene symbol | Score(d) | Fold Change |
|-----------------|-------------|----------|-------------|
| ENSG00000171824 | EXOSC10     | 2,62     | 1,26        |
| ENSG00000119953 | SMNDC1      | 2,62     | 1,36        |
| ENSG00000184502 | GAST        | 2,62     | 1,17        |
| ENSG00000171867 | PRNP        | 2,62     | 1,40        |
| ENSG00000172602 | RND1        | 2,62     | 1,28        |
| ENSG00000110958 | PTGES3      | 2,62     | 1,27        |
| ENSG00000141551 | CSNK1D      | 2,62     | 1,32        |
| ENSG00000092621 | PHGDH       | 2,62     | 1,73        |
| ENSG00000188786 | MTF1        | 2,62     | 1,37        |
| ENSG00000135900 | MRPL44      | 2,62     | 1,24        |
| ENSG00000159459 | UBR1        | 2,61     | 1,37        |
| ENSG00000161040 | FBXL13      | 2,61     | 1,40        |
| ENSG00000147419 | CCDC25      | 2,61     | 1,32        |
| ENSG00000187980 | PLA2G2C     | 2,61     | 1,23        |
| ENSG00000144029 | MRPS5       | 2,61     | 1,25        |
| ENSG00000182584 | ACTL10      | 2,61     | 1,16        |
| ENSG00000131019 | ULBP3       | 2,61     | 1,27        |
| ENSG00000118680 | MYL12B      | 2,61     | 1,40        |
| ENSG00000164951 | PDP1        | 2,61     | 1,28        |
| ENSG00000117682 | DHDDS       | 2,61     | 1,32        |
| ENSG00000171314 | PGAM1       | 2,61     | 1,46        |
| ENSG00000173812 | EIF1        | 2,61     | 1,13        |
| ENSG00000126458 | RRAS        | 2,60     | 1,92        |
| ENSG00000196550 | FAM72A      | 2,60     | 1,40        |
| ENSG00000135404 | CD63        | 2,60     | 1,59        |
| ENSG00000166747 | AP1G1       | 2,60     | 1,44        |
| ENSG00000127774 | EMC6        | 2,60     | 1,23        |
| ENSG00000134684 | YARS        | 2,60     | 1,37        |
| ENSG00000278540 | ACACA       | 2,60     | 1,32        |
| ENSG00000187097 | ENTPD5      | 2,60     | 1,35        |
| ENSG00000114942 | EEF1B2      | 2,60     | 1,50        |
| ENSG00000083520 | DIS3        | 2,60     | 1,37        |
| ENSG00000092841 | MYL6        | 2,60     | 1,33        |
| ENSG00000196381 | ZNF781      | 2,59     | 1,25        |
| ENSG00000182890 | GLUD2       | 2,59     | 1,23        |
| ENSG00000103550 | KNOP1       | 2,59     | 1,36        |
| ENSG00000148688 | RPP30       | 2,59     | 1,28        |
| ENSG00000148680 | HTR7        | 2,59     | 1,25        |
| ENSG00000144035 | NAT8        | 2,59     | 1,20        |
| ENSG00000261115 | TMEM178B    | 2,59     | 1,27        |
| ENSG00000156313 | RPGR        | 2,58     | 1,33        |
| ENSG00000163931 | TKT         | 2,58     | 1,48        |
| ENSG00000100814 | CCNB1IP1    | 2,58     | 1,77        |
| ENSG00000140941 | MAP1LC3B    | 2,58     | 1,63        |
| ENSG00000127337 | YEATS4      | 2,58     | 1,32        |
| ENSG00000100629 | CEP128      | 2,58     | 1,71        |
| ENSG00000143622 | RIT1        | 2,58     | 1,37        |
| ENSG00000175793 | SFN         | 2,58     | 1,29        |
| ENSG00000179912 | R3HDM2      | 2,58     | 1,40        |

| ensembl gene    | gene symbol | Score(d) | Fold Change |
|-----------------|-------------|----------|-------------|
| ENSG00000183287 | CCBE1       | 2,58     | 1,22        |
| ENSG00000204389 | HSPA1A      | 2,58     | 2,39        |
| ENSG00000187735 | TCEA1       | 2,58     | 1,30        |
| ENSG00000180929 | GPR62       | 2,57     | 1,13        |
| ENSG00000176542 | USF3        | 2,57     | 1,28        |
| ENSG00000075188 | NUP37       | 2,57     | 1,38        |
| ENSG00000135776 | ABCB10      | 2,57     | 1,25        |
| ENSG00000184564 | SLITRK6     | 2,57     | 1,15        |
| ENSG00000089101 | CFAP61      | 2,57     | 1,31        |
| ENSG00000136404 | TM6SF1      | 2,57     | 2,01        |
| ENSG00000105639 | JAK3        | 2,57     | 1,48        |
| ENSG00000164032 | H2AFZ       | 2,57     | 1,33        |
| ENSG00000243910 | TUBA4B      | 2,57     | 1,16        |
| ENSG00000182107 | TMEM30B     | 2,57     | 1,35        |
| ENSG00000147274 | RBMX        | 2,57     | 1,38        |
| ENSG00000163098 | BIRC8       | 2,57     | 1,20        |
| ENSG00000103978 | TMEM87A     | 2,57     | 1,27        |
| ENSG00000114439 | BBX         | 2,57     | 1,36        |
| ENSG00000130487 | KLHDC7B     | 2,57     | 1,37        |
| ENSG00000136048 | DRAM1       | 2,56     | 1,70        |
| ENSG00000177971 | IMP3        | 2,56     | 1,23        |
| ENSG00000164211 | STARD4      | 2,56     | 1,40        |
| ENSG00000213085 | CFAP45      | 2,56     | 1,40        |
| ENSG00000167550 | RHEBL1      | 2,56     | 1,32        |
| ENSG00000178623 | GPR35       | 2,56     | 1,17        |
| ENSG00000244752 | CRYBB2      | 2,56     | 1,13        |
| ENSG00000117595 | IRF6        | 2,56     | 1,38        |
| ENSG00000100916 | BRMS1L      | 2,56     | 1,63        |
| ENSG00000103145 | HCFC1R1     | 2,56     | 1,23        |
| ENSG00000197622 | CDC42SE1    | 2,56     | 1,40        |
| ENSG00000129910 | CDH15       | 2,56     | 1,20        |
| ENSG00000165264 | NDUFB6      | 2,56     | 1,33        |
| ENSG00000176022 | B3GALT6     | 2,56     | 1,23        |
| ENSG00000150403 | TMCO3       | 2,55     | 1,46        |
| ENSG00000180878 | C11orf42    | 2,55     | 1,16        |
| ENSG00000261609 | GAN         | 2,55     | 1,11        |
| ENSG00000150779 | TIMM8B      | 2,55     | 1,31        |
| ENSG00000058729 | RIOK2       | 2,55     | 1,34        |
| ENSG00000102683 | SGCG        | 2,55     | 1,19        |
| ENSG00000170633 | RNF34       | 2,55     | 1,23        |
| ENSG00000163794 | UCN         | 2,55     | 1,14        |
| ENSG00000155008 | APOOL       | 2,55     | 1,22        |
| ENSG00000183779 | ZNF703      | 2,55     | 1,33        |
| ENSG00000135632 | SMYD5       | 2,55     | 1,27        |
| ENSG00000087206 | UIMC1       | 2,55     | 1,30        |
| ENSG00000135378 | PRRG4       | 2,55     | 2,05        |
| ENSG00000176390 | CRLF3       | 2,55     | 1,30        |
| ENSG00000165449 | SLC16A9     | 2,55     | 1,32        |
| ENSG00000182199 | SHMT2       | 2,55     | 1,54        |



| ensembl gene    | gene symbol  | Score(d) | Fold Change |
|-----------------|--------------|----------|-------------|
| ENSG00000114854 | TNNC1        | 2,54     | 1,22        |
| ENSG00000134160 | TRPM1        | 2,54     | 1,15        |
| ENSG00000128510 | CPA4         | 2,54     | 1,19        |
| ENSG00000163491 | NEK10        | 2,54     | 1,20        |
| ENSG00000134575 | ACP2         | 2,54     | 1,37        |
| ENSG00000123992 | DNPEP        | 2,54     | 1,21        |
| ENSG00000173110 | HSPA6        | 2,54     | 1,61        |
| ENSG00000070669 | ASNS         | 2,54     | 1,50        |
| ENSG00000198742 | SMURF1       | 2,54     | 1,51        |
| ENSG00000100784 | RPS6KA5      | 2,54     | 1,46        |
| ENSG00000011114 | BTBD7        | 2,54     | 1,30        |
| ENSG00000109390 | NDUFC1       | 2,54     | 1,27        |
| ENSG00000123349 | PFDN5        | 2,54     | 1,30        |
| ENSG00000103429 | BFAR         | 2,54     | 1,21        |
| ENSG00000177885 | GRB2         | 2,54     | 1,25        |
| ENSG00000172890 | NADSYN1      | 2,53     | 1,23        |
| ENSG00000236981 | OR10G9       | 2,53     | 1,16        |
| ENSG00000134108 | ARL8B        | 2,53     | 1,34        |
| ENSG00000172867 | KRT2         | 2,53     | 1,18        |
| ENSG00000137692 | DCUN1D5      | 2,53     | 1,44        |
| ENSG00000164604 | GPR85        | 2,53     | 1,24        |
| ENSG00000165410 | CFL2         | 2,53     | 1,50        |
| ENSG00000090104 | RGS1         | 2,53     | 2,32        |
| ENSG00000065978 | YBX1         | 2,53     | 1,28        |
| ENSG00000165309 | ARMC3        | 2,53     | 1,35        |
| ENSG00000072401 | UBE2D1       | 2,53     | 1,41        |
| ENSG00000157625 | TAB3         | 2,52     | 1,33        |
| ENSG00000283361 | RP11-569D9.5 | 2,52     | 1,14        |
| ENSG00000179051 | RCC2         | 2,52     | 1,31        |
| ENSG00000129204 | USP6         | 2,52     | 1,19        |
| ENSG00000185338 | SOCS1        | 2,52     | 1,63        |
| ENSG00000117000 | RLF          | 2,52     | 1,36        |
| ENSG00000160410 | SHKBP1       | 2,52     | 1,21        |
| ENSG00000186795 | KCNK18       | 2,52     | 1,12        |
| ENSG00000090539 | CHRD         | 2,52     | 1,29        |
| ENSG00000071243 | ING3         | 2,52     | 1,24        |
| ENSG00000105556 | MIER2        | 2,52     | 1,37        |
| ENSG00000053254 | FOXP3        | 2,52     | 1,26        |
| ENSG00000217555 | CKLF         | 2,52     | 1,52        |
| ENSG00000115073 | ACTR1B       | 2,51     | 1,32        |
| ENSG00000173762 | CD7          | 2,51     | 1,16        |
| ENSG00000183798 | EMILIN3      | 2,51     | 1,18        |
| ENSG00000137473 | TTC29        | 2,51     | 1,21        |
| ENSG00000087266 | SH3BP2       | 2,51     | 1,52        |
| ENSG00000168280 | KIF5C        | 2,51     | 1,39        |
| ENSG00000179057 | IGSF22       | 2,51     | 1,14        |
| ENSG00000179817 | MRGPRX4      | 2,51     | 1,28        |
| ENSG00000198252 | STYX         | 2,51     | 1,27        |
| ENSG00000168903 | BTNL3        | 2,51     | 1,18        |

| ensembl gene    | gene symbol | Score(d) | Fold Change |
|-----------------|-------------|----------|-------------|
| ENSG00000187475 | HIST1H1T    | 2,51     | 2,13        |
| ENSG00000100385 | IL2RB       | 2,51     | 2,01        |
| ENSG00000109625 | CPZ         | 2,51     | 1,20        |
| ENSG00000116786 | PLEKHM2     | 2,51     | 1,29        |
| ENSG00000141933 | TPGS1       | 2,51     | 1,23        |
| ENSG00000124812 | CRISP1      | 2,51     | 1,16        |
| ENSG00000255150 | EID3        | 2,51     | 1,39        |
| ENSG00000120907 | ADRA1A      | 2,50     | 1,18        |
| ENSG00000116030 | SUMO1       | 2,50     | 1,26        |
| ENSG00000103522 | IL21R       | 2,50     | 1,41        |
| ENSG00000157093 | LYZL4       | 2,50     | 1,18        |
| ENSG00000169139 | UBE2V2      | 2,50     | 1,39        |
| ENSG00000205126 | ACCSL       | 2,50     | 1,16        |
| ENSG00000128805 | ARHGAP22    | 2,50     | 1,49        |
| ENSG00000120837 | NFYB        | 2,50     | 1,39        |
| ENSG00000115539 | PDCL3       | 2,50     | 1,59        |
| ENSG00000099290 | FAM21A      | 2,50     | 1,28        |
| ENSG00000175193 | PARL        | 2,50     | 1,32        |
| ENSG00000137200 | CMTR1       | 2,50     | 1,24        |
| ENSG00000090263 | MRPS33      | 2,50     | 1,45        |
| ENSG00000126003 | PLAGL2      | 2,50     | 1,47        |
| ENSG00000054179 | ENTPD2      | 2,50     | 1,21        |
| ENSG00000148215 | OR5C1       | 2,49     | 1,13        |
| ENSG00000104325 | DECR1       | 2,49     | 1,48        |
| ENSG00000115263 | GCG         | 2,49     | 1,31        |
| ENSG00000109606 | DHX15       | 2,49     | 1,25        |
| ENSG00000133134 | BEX2        | 2,49     | 1,40        |
| ENSG00000142168 | SOD1        | 2,49     | 1,29        |
| ENSG00000163541 | SUCLG1      | 2,49     | 1,27        |
| ENSG00000114353 | GNAI2       | 2,49     | 1,21        |
| ENSG00000100296 | THOC5       | 2,49     | 1,31        |
| ENSG00000116903 | EXOC8       | 2,49     | 1,41        |
| ENSG00000163902 | RPN1        | 2,49     | 1,48        |
| ENSG00000187516 | HYPM        | 2,49     | 1,19        |
| ENSG00000216937 | CCDC7       | 2,49     | 1,46        |
| ENSG00000163346 | PBXIP1      | 2,49     | 1,58        |
| ENSG00000076604 | TRAF4       | 2,48     | 1,33        |
| ENSG00000183684 | ALYREF      | 2,48     | 1,24        |
| ENSG00000170909 | OSCAR       | 2,48     | 1,28        |
| ENSG00000105186 | ANKRD27     | 2,48     | 1,38        |
| ENSG00000174562 | KLK15       | 2,48     | 1,22        |
| ENSG00000074755 | ZZEF1       | 2,48     | 1,24        |
| ENSG00000165389 | SPTSSA      | 2,48     | 1,22        |
| ENSG00000101193 | GID8        | 2,48     | 1,17        |
| ENSG00000103254 | FAM173A     | 2,48     | 1,31        |
| ENSG00000167770 | OTUB1       | 2,48     | 1,17        |
| ENSG00000188672 | RHCE        | 2,48     | 1,25        |
| ENSG00000085832 | EPS15       | 2,48     | 1,33        |
| ENSG00000128578 | STRIP2      | 2,48     | 1,20        |

| ensembl gene    | gene symbol   | Score(d) | Fold Change |
|-----------------|---------------|----------|-------------|
| ENSG00000198920 | KIAA0753      | 2,48     | 1,28        |
| ENSG00000183283 | DAZAP2        | 2,48     | 1,28        |
| ENSG00000173905 | GOLIM4        | 2,48     | 1,33        |
| ENSG00000164338 | UTP15         | 2,47     | 1,26        |
| ENSG00000117569 | PTBP2         | 2,47     | 1,50        |
| ENSG00000258465 | RP11-574F21.3 | 2,47     | 1,17        |
| ENSG00000181004 | BBS12         | 2,47     | 1,26        |
| ENSG00000079335 | CDC14A        | 2,47     | 1,89        |
| ENSG00000165806 | CASP7         | 2,47     | 1,43        |
| ENSG00000107521 | HPS1          | 2,47     | 1,19        |
| ENSG00000205629 | LCMT1         | 2,47     | 1,26        |
| ENSG00000186834 | HEXIM1        | 2,47     | 1,38        |
| ENSG00000111727 | HCFC2         | 2,47     | 1,56        |
| ENSG00000168397 | ATG4B         | 2,47     | 1,35        |
| ENSG00000204019 | CT83          | 2,47     | 1,16        |
| ENSG00000127603 | MACF1         | 2,47     | 1,27        |
| ENSG00000101327 | PDYN          | 2,46     | 1,15        |
| ENSG00000186281 | GPAT2         | 2,46     | 1,50        |
| ENSG00000144228 | SPOPL         | 2,46     | 1,41        |
| ENSG00000105398 | SULT2A1       | 2,46     | 1,16        |
| ENSG00000142864 | SERBP1        | 2,46     | 1,32        |
| ENSG00000188542 | DUSP28        | 2,46     | 1,37        |
| ENSG00000159840 | ZYX           | 2,46     | 1,51        |
| ENSG00000126653 | NSRP1         | 2,46     | 1,19        |
| ENSG00000085788 | DDHD2         | 2,46     | 1,32        |
| ENSG00000103275 | UBE2I         | 2,46     | 1,28        |
| ENSG00000213638 | ADAT3         | 2,46     | 1,22        |
| ENSG00000100226 | GTPBP1        | 2,46     | 1,30        |
| ENSG00000124449 | IRGC          | 2,46     | 1,22        |
| ENSG00000015153 | YAF2          | 2,46     | 1,41        |
| ENSG00000155816 | FMN2          | 2,46     | 1,19        |
| ENSG00000130150 | MOSPD2        | 2,46     | 1,35        |
| ENSG00000179988 | PSTK          | 2,45     | 1,26        |
| ENSG00000172331 | BPGM          | 2,45     | 1,39        |
| ENSG00000135249 | RINT1         | 2,45     | 1,24        |
| ENSG00000111087 | GLI1          | 2,45     | 1,17        |
| ENSG00000066027 | PPP2R5A       | 2,45     | 1,39        |
| ENSG00000007376 | RPUSD1        | 2,45     | 1,25        |
| ENSG00000196872 | KIAA1211L     | 2,45     | 1,28        |
| ENSG00000132382 | MYBBP1A       | 2,45     | 1,23        |
| ENSG00000126062 | TMEM115       | 2,45     | 1,20        |
| ENSG00000121680 | PEX16         | 2,45     | 1,18        |
| ENSG00000104518 | GSDMD         | 2,45     | 1,36        |
| ENSG00000152409 | JMY           | 2,45     | 1,46        |
| ENSG00000055070 | SZRD1         | 2,45     | 1,26        |
| ENSG00000130635 | COL5A1        | 2,44     | 1,10        |
| ENSG00000138796 | HADH          | 2,44     | 1,50        |
| ENSG00000186020 | ZNF529        | 2,44     | 1,58        |
| ENSG00000132589 | FLOT2         | 2,44     | 1,28        |

| ensembl gene    | gene symbol | Score(d) | Fold Change |
|-----------------|-------------|----------|-------------|
| ENSG00000205856 | C22orf42    | 2,44     | 1,19        |
| ENSG00000250120 | PCDHA10     | 2,44     | 1,17        |
| ENSG00000137996 | RTCA        | 2,44     | 1,32        |
| ENSG00000177602 | GSG2        | 2,44     | 1,40        |
| ENSG00000078668 | VDAC3       | 2,44     | 1,40        |
| ENSG00000172586 | CHCHD1      | 2,44     | 1,37        |
| ENSG00000110244 | APOA4       | 2,43     | 1,14        |
| ENSG00000165688 | PMPCA       | 2,43     | 1,29        |
| ENSG00000177084 | POLE        | 2,43     | 1,33        |
| ENSG00000126895 | AVPR2       | 2,43     | 1,14        |
| ENSG00000145476 | CYP4V2      | 2,43     | 1,74        |
| ENSG00000132825 | PPP1R3D     | 2,43     | 1,17        |
| ENSG00000108774 | RAB5C       | 2,43     | 1,27        |
| ENSG00000187950 | OVCH1       | 2,43     | 1,25        |
| ENSG00000104442 | ARMC1       | 2,43     | 1,38        |
| ENSG00000145912 | NHP2        | 2,42     | 1,33        |
| ENSG00000139154 | AEBP2       | 2,42     | 1,29        |
| ENSG00000188763 | FZD9        | 2,42     | 1,16        |
| ENSG00000104381 | GDAP1       | 2,42     | 1,50        |
| ENSG00000139200 | PIANP       | 2,42     | 1,22        |
| ENSG00000185958 | FAM186A     | 2,42     | 1,09        |
| ENSG00000180921 | FAM83H      | 2,42     | 1,21        |
| ENSG00000168454 | TXNDC2      | 2,42     | 1,18        |
| ENSG00000143207 | RFWD2       | 2,42     | 1,31        |
| ENSG00000164615 | CAMLG       | 2,42     | 1,31        |
| ENSG00000104320 | NBN         | 2,42     | 1,41        |
| ENSG00000126215 | XRCC3       | 2,42     | 1,19        |
| ENSG00000031081 | ARHGAP31    | 2,42     | 1,41        |
| ENSG00000135220 | UGT2A3      | 2,42     | 1,19        |
| ENSG00000129518 | EAPP        | 2,42     | 1,30        |
| ENSG00000134897 | BIVM        | 2,42     | 1,43        |
| ENSG00000128513 | POT1        | 2,41     | 1,42        |
| ENSG00000186063 | AIDA        | 2,41     | 1,57        |
| ENSG00000183166 | CALN1       | 2,41     | 1,20        |
| ENSG00000169436 | COL22A1     | 2,41     | 1,37        |
| ENSG00000108179 | PPIF        | 2,41     | 1,36        |
| ENSG00000176244 | ACBD7       | 2,41     | 1,19        |
| ENSG00000105499 | PLA2G4C     | 2,41     | 1,43        |
| ENSG00000171431 | KRT20       | 2,41     | 1,26        |
| ENSG00000006715 | VPS41       | 2,41     | 1,35        |
| ENSG00000116459 | ATP5F1      | 2,41     | 1,23        |
| ENSG00000135245 | HILPDA      | 2,41     | 1,47        |
| ENSG00000165704 | HPRT1       | 2,40     | 1,47        |
| ENSG00000204574 | ABCF1       | 2,40     | 1,21        |
| ENSG00000174720 | LARP7       | 2,40     | 1,28        |
| ENSG00000137251 | TINAG       | 2,40     | 1,24        |
| ENSG00000206026 | SMIM21      | 2,40     | 1,24        |
| ENSG00000146809 | ASB15       | 2,40     | 1,13        |
| ENSG00000144821 | MYH15       | 2,40     | 1,43        |

| ensembl gene    | gene symbol | Score(d) | Fold Change |
|-----------------|-------------|----------|-------------|
| ENSG00000150316 | CWC15       | 2,40     | 1,20        |
| ENSG00000122483 | CCDC18      | 2,40     | 1,48        |
| ENSG00000037280 | FLT4        | 2,40     | 1,16        |
| ENSG00000170965 | PLAC1       | 2,40     | 1,52        |
| ENSG00000119599 | DCAF4       | 2,40     | 1,28        |
| ENSG00000108384 | RAD51C      | 2,40     | 1,44        |
| ENSG00000255552 | LY6G6E      | 2,40     | 1,21        |
| ENSG00000182957 | SPATA13     | 2,40     | 2,05        |
| ENSG00000177683 | THAP5       | 2,40     | 1,36        |
| ENSG00000144369 | FAM171B     | 2,40     | 1,93        |
| ENSG00000164609 | SLU7        | 2,40     | 1,25        |
| ENSG00000104756 | KCTD9       | 2,40     | 1,45        |
| ENSG00000196131 | VN1R2       | 2,39     | 1,29        |
| ENSG00000023445 | BIRC3       | 2,39     | 2,49        |
| ENSG00000204396 | VWA7        | 2,39     | 1,27        |
| ENSG00000006695 | COX10       | 2,39     | 1,31        |
| ENSG00000163530 | DPPA2       | 2,39     | 1,22        |
| ENSG00000033867 | SLC4A7      | 2,39     | 1,43        |
| ENSG00000121644 | DESI2       | 2,39     | 1,32        |
| ENSG00000025708 | TYMP        | 2,39     | 1,52        |
| ENSG00000166189 | HPS6        | 2,39     | 1,14        |
| ENSG00000164935 | DCSTAMP     | 2,39     | 1,19        |
| ENSG00000080618 | CPB2        | 2,39     | 1,14        |
| ENSG00000123575 | FAM199X     | 2,39     | 1,30        |
| ENSG00000205323 | SARNP       | 2,39     | 1,48        |
| ENSG00000128050 | PAICS       | 2,38     | 1,39        |
| ENSG00000132405 | TBC1D14     | 2,38     | 1,26        |
| ENSG00000185236 | RAB11B      | 2,38     | 1,18        |
| ENSG00000151748 | SAV1        | 2,38     | 1,63        |
| ENSG00000020633 | RUNX3       | 2,38     | 1,42        |
| ENSG00000171798 | KNDC1       | 2,38     | 1,20        |
| ENSG00000185105 | MYADML2     | 2,38     | 1,16        |
| ENSG00000166292 | TMEM100     | 2,38     | 1,19        |
| ENSG00000180044 | C3orf80     | 2,38     | 1,20        |
| ENSG00000153498 | SPACA7      | 2,38     | 1,15        |
| ENSG00000162755 | KLHDC9      | 2,38     | 1,34        |
| ENSG00000125430 | HS3ST3B1    | 2,38     | 1,71        |
| ENSG00000134594 | RAB33A      | 2,38     | 1,72        |
| ENSG00000057657 | PRDM1       | 2,38     | 1,27        |
| ENSG00000059691 | GATB        | 2,38     | 1,33        |
| ENSG00000156273 | BACH1       | 2,38     | 1,35        |
| ENSG00000137337 | MDC1        | 2,38     | 1,18        |
| ENSG00000213281 | NRAS        | 2,38     | 1,36        |
| ENSG00000186575 | NF2         | 2,38     | 1,31        |
| ENSG00000123908 | AGO2        | 2,38     | 1,40        |
| ENSG00000178105 | DDX10       | 2,37     | 1,44        |
| ENSG00000163618 | CADPS       | 2,37     | 1,95        |
| ENSG00000168273 | SMIM4       | 2,37     | 1,21        |
| ENSG00000099985 | OSM         | 2,37     | 1,25        |

| ensembl gene    | gene symbol | Score(d) | Fold Change |
|-----------------|-------------|----------|-------------|
| ENSG00000137154 | RPS6        | 2,37     | 1,36        |
| ENSG00000125850 | OVOL2       | 2,37     | 1,17        |
| ENSG00000100731 | PCNX1       | 2,37     | 1,50        |
| ENSG00000260596 | DUX4        | 2,37     | 1,45        |
| ENSG00000204583 | LRCOL1      | 2,37     | 1,12        |
| ENSG00000159658 | EFCAB14     | 2,36     | 1,25        |
| ENSG00000198938 | MT-CO3      | 2,36     | 1,08        |
| ENSG00000133131 | MORC4       | 2,36     | 1,41        |
| ENSG00000018610 | CXorf56     | 2,36     | 1,31        |
| ENSG00000117010 | ZNF684      | 2,36     | 1,34        |
| ENSG00000188991 | SLC15A5     | 2,36     | 1,12        |
| ENSG00000169306 | IL1RAPL1    | 2,36     | 1,12        |
| ENSG00000117395 | EBNA1BP2    | 2,36     | 1,24        |
| ENSG00000133169 | BEX1        | 2,36     | 1,51        |
| ENSG00000166710 | B2M         | 2,36     | 1,24        |
| ENSG00000196376 | SLC35F1     | 2,36     | 1,96        |
| ENSG00000100138 | SNU13       | 2,36     | 1,30        |
| ENSG00000168930 | TRIM49      | 2,36     | 1,23        |
| ENSG00000164236 | ANKRD33B    | 2,36     | 1,31        |
| ENSG00000140284 | SLC27A2     | 2,36     | 1,53        |
| ENSG00000130720 | FIBCD1      | 2,35     | 1,25        |
| ENSG00000159708 | LRRC36      | 2,35     | 1,23        |
| ENSG00000173821 | RNF213      | 2,35     | 1,46        |
| ENSG00000143401 | ANP32E      | 2,35     | 1,38        |
| ENSG00000164045 | CDC25A      | 2,35     | 1,29        |
| ENSG00000143324 | XPR1        | 2,35     | 1,32        |
| ENSG00000178096 | BOLA1       | 2,35     | 1,44        |
| ENSG00000186462 | NAP1L2      | 2,35     | 2,08        |
| ENSG00000187323 | DCC         | 2,35     | 2,57        |
| ENSG00000254685 | FPGT        | 2,35     | 1,37        |
| ENSG00000064726 | BTBD1       | 2,35     | 1,39        |
| ENSG00000130943 | PKDREJ      | 2,35     | 1,13        |
| ENSG00000143314 | MRPL24      | 2,35     | 1,50        |
| ENSG00000172421 | EFCAB3      | 2,35     | 1,17        |
| ENSG00000135677 | GNS         | 2,35     | 1,24        |
| ENSG00000139168 | ZCRB1       | 2,35     | 1,24        |
| ENSG00000180745 | CLRN3       | 2,35     | 1,12        |
| ENSG00000172262 | ZNF131      | 2,35     | 1,26        |
| ENSG00000176749 | CDK5R1      | 2,35     | 1,27        |
| ENSG00000111266 | DUSP16      | 2,35     | 1,23        |
| ENSG00000163689 | C3orf67     | 2,35     | 1,41        |
| ENSG00000059758 | CDK17       | 2,34     | 1,31        |
| ENSG00000015475 | BID         | 2,34     | 1,22        |
| ENSG00000107560 | RAB11FIP2   | 2,34     | 1,25        |
| ENSG00000241697 | TMEFF1      | 2,34     | 1,33        |
| ENSG00000116670 | MAD2L2      | 2,34     | 1,30        |
| ENSG00000147041 | SYTL5       | 2,34     | 1,28        |
| ENSG00000167258 | CDK12       | 2,34     | 1,18        |
| ENSG00000123892 | RAB38       | 2,34     | 1,23        |

| ensembl gene    | gene symbol | Score(d) | Fold Change |
|-----------------|-------------|----------|-------------|
| ENSG00000100109 | TFIP11      | 2,34     | 1,20        |
| ENSG00000127946 | HIP1        | 2,34     | 1,36        |
| ENSG00000187624 | C17orf97    | 2,34     | 1,24        |
| ENSG00000053900 | ANAPC4      | 2,34     | 1,33        |
| ENSG00000148719 | DNAJB12     | 2,34     | 1,23        |
| ENSG00000172020 | GAP43       | 2,34     | 1,17        |
| ENSG00000134107 | BHLHE40     | 2,34     | 1,74        |
| ENSG00000186566 | GPATCH8     | 2,34     | 1,18        |
| ENSG00000168118 | RAB4A       | 2,34     | 1,50        |
| ENSG00000175018 | TEX36       | 2,33     | 1,15        |
| ENSG00000136045 | PWP1        | 2,33     | 1,24        |
| ENSG00000130675 | MNX1        | 2,33     | 1,20        |
| ENSG00000204616 | TRIM31      | 2,33     | 1,17        |
| ENSG00000255274 | TMPRSS4-AS1 | 2,33     | 1,22        |
| ENSG00000114933 | INO80D      | 2,33     | 1,26        |
| ENSG00000163866 | SMIM12      | 2,33     | 1,20        |
| ENSG00000197586 | ENTPD6      | 2,33     | 1,24        |
| ENSG00000119203 | CPSF3       | 2,33     | 1,25        |
| ENSG00000169727 | GPS1        | 2,33     | 1,24        |
| ENSG00000136286 | MYO1G       | 2,33     | 1,77        |
| ENSG00000125363 | AMELX       | 2,32     | 1,24        |
| ENSG00000125827 | TMX4        | 2,32     | 1,56        |
| ENSG00000181192 | DHTKD1      | 2,32     | 1,24        |
| ENSG00000050767 | COL23A1     | 2,32     | 1,22        |
| ENSG00000085644 | ZNF213      | 2,32     | 1,18        |
| ENSG00000163811 | WDR43       | 2,32     | 1,30        |
| ENSG00000256713 | PGA5        | 2,32     | 1,32        |
| ENSG00000165985 | C1QL3       | 2,32     | 1,54        |
| ENSG00000143450 | OAZ3        | 2,32     | 1,21        |
| ENSG00000105141 | CASP14      | 2,32     | 1,26        |
| ENSG00000108100 | CCNY        | 2,32     | 1,21        |
| ENSG00000145911 | N4BP3       | 2,32     | 1,19        |
| ENSG00000152969 | JAKMIP1     | 2,32     | 1,17        |
| ENSG00000165175 | MID1IP1     | 2,32     | 1,36        |
| ENSG00000099977 | DDT         | 2,32     | 1,31        |
| ENSG00000205302 | SNX2        | 2,31     | 1,31        |
| ENSG00000265354 | TIMM23      | 2,31     | 1,22        |
| ENSG00000135842 | FAM129A     | 2,31     | 2,04        |
| ENSG00000138382 | METTL5      | 2,31     | 1,28        |
| ENSG00000107807 | TLX1        | 2,31     | 1,28        |
| ENSG00000166159 | LRTM2       | 2,31     | 1,24        |
| ENSG00000188993 | LRRC66      | 2,31     | 1,25        |
| ENSG00000124207 | CSE1L       | 2,31     | 1,31        |
| ENSG00000187796 | CARD9       | 2,31     | 1,16        |
| ENSG00000186288 | PABPC1L2A   | 2,31     | 1,17        |
| ENSG00000117153 | KLHL12      | 2,31     | 1,32        |
| ENSG00000086666 | ZFAND6      | 2,31     | 1,32        |
| ENSG00000275896 | PRSS2       | 2,31     | 1,22        |
| ENSG00000155592 | ZKSCAN2     | 2,31     | 1,22        |

| ensembl gene    | gene symbol | Score(d) | Fold Change |
|-----------------|-------------|----------|-------------|
| ENSG00000108639 | SYNGR2      | 2,31     | 1,35        |
| ENSG00000090061 | CCNK        | 2,31     | 1,23        |
| ENSG00000163754 | GYG1        | 2,31     | 1,34        |
| ENSG00000142230 | SAE1        | 2,31     | 1,29        |
| ENSG00000186625 | KATNA1      | 2,31     | 1,24        |
| ENSG00000034677 | RNF19A      | 2,30     | 1,36        |
| ENSG00000134419 | RPS15A      | 2,30     | 1,44        |
| ENSG00000145423 | SFRP2       | 2,30     | 1,62        |
| ENSG00000120211 | INSL4       | 2,30     | 1,14        |
| ENSG00000135625 | EGR4        | 2,30     | 1,15        |
| ENSG00000237110 | TAAR9       | 2,30     | 1,14        |
| ENSG00000130052 | STARD8      | 2,30     | 1,35        |
| ENSG00000180988 | OR52N2      | 2,30     | 1,16        |
| ENSG00000162650 | ATXN7L2     | 2,30     | 1,19        |
| ENSG00000132323 | ILKAP       | 2,30     | 1,26        |
| ENSG00000205838 | TTC23L      | 2,30     | 1,16        |
| ENSG00000034533 | ASTE1       | 2,30     | 1,27        |
| ENSG00000239732 | TLR9        | 2,30     | 1,40        |
| ENSG00000183864 | TOB2        | 2,30     | 1,36        |
| ENSG00000206549 | PRSS50      | 2,30     | 1,09        |
| ENSG00000101752 | MIB1        | 2,30     | 1,31        |
| ENSG00000243710 | CFAP57      | 2,29     | 1,15        |
| ENSG00000105393 | BABAM1      | 2,29     | 1,27        |
| ENSG00000163216 | SPRR2D      | 2,29     | 1,30        |
| ENSG00000206557 | TRIM71      | 2,29     | 1,14        |
| ENSG00000160445 | ZER1        | 2,29     | 1,19        |
| ENSG00000162734 | PEA15       | 2,29     | 1,47        |
| ENSG00000142544 | CTU1        | 2,29     | 1,21        |
| ENSG00000173726 | TOMM20      | 2,29     | 1,51        |
| ENSG00000088386 | SLC15A1     | 2,29     | 1,14        |
| ENSG00000141279 | NPEPPS      | 2,29     | 1,33        |
| ENSG00000116885 | OSCP1       | 2,29     | 1,31        |
| ENSG00000006611 | USH1C       | 2,29     | 1,21        |
| ENSG00000171488 | LRR8C       | 2,29     | 1,61        |
| ENSG00000184156 | KCNQ3       | 2,29     | 1,41        |
| ENSG00000120948 | TARDBP      | 2,29     | 1,54        |
| ENSG00000169016 | E2F6        | 2,29     | 1,27        |
| ENSG00000188649 | CC2D2B      | 2,29     | 1,31        |
| ENSG00000106436 | MYL10       | 2,29     | 1,13        |
| ENSG00000163510 | CWC22       | 2,29     | 1,27        |
| ENSG00000145632 | PLK2        | 2,29     | 1,82        |
| ENSG00000235863 | B3GALT4     | 2,29     | 1,30        |
| ENSG00000108175 | ZMIZ1       | 2,29     | 1,77        |
| ENSG00000102225 | CDK16       | 2,28     | 1,21        |
| ENSG00000125454 | SLC25A19    | 2,28     | 1,42        |
| ENSG00000151694 | ADAM17      | 2,28     | 1,35        |
| ENSG00000186104 | CYP2R1      | 2,28     | 1,39        |
| ENSG00000278053 | DDX52       | 2,28     | 1,27        |
| ENSG00000206432 | TMEM200C    | 2,28     | 1,12        |



| ensembl gene    | gene symbol | Score(d) | Fold Change |
|-----------------|-------------|----------|-------------|
| ENSG00000143436 | MRPL9       | 2,28     | 1,22        |
| ENSG00000122687 | MRM2        | 2,28     | 1,25        |
| ENSG00000135722 | FBXL8       | 2,28     | 1,17        |
| ENSG00000174373 | RALGAPA1    | 2,28     | 1,22        |
| ENSG00000111605 | CPSF6       | 2,28     | 1,25        |
| ENSG00000121067 | SPOP        | 2,28     | 1,32        |
| ENSG00000164944 | KIAA1429    | 2,28     | 1,33        |
| ENSG00000185559 | DLK1        | 2,28     | 1,25        |
| ENSG00000125945 | ZNF436      | 2,28     | 1,25        |
| ENSG00000236609 | ZNF853      | 2,28     | 1,13        |
| ENSG00000272886 | DCP1A       | 2,28     | 1,24        |
| ENSG00000158764 | ITLN2       | 2,28     | 1,15        |
| ENSG00000125089 | SH3TC1      | 2,28     | 1,30        |
| ENSG00000131653 | TRAF7       | 2,28     | 1,31        |
| ENSG00000115419 | GLS         | 2,28     | 1,25        |
| ENSG00000128641 | MYO1B       | 2,28     | 1,77        |
| ENSG00000160695 | VPS11       | 2,28     | 1,20        |
| ENSG00000246705 | H2AFJ       | 2,28     | 1,42        |
| ENSG00000244274 | DBNDD2      | 2,28     | 1,24        |
| ENSG00000080007 | DDX43       | 2,28     | 1,62        |
| ENSG00000150787 | PTS         | 2,27     | 1,21        |
| ENSG00000187642 | PERM1       | 2,27     | 1,13        |
| ENSG00000197619 | ZNF615      | 2,27     | 1,50        |
| ENSG00000188227 | ZNF793      | 2,27     | 1,24        |
| ENSG00000021574 | SPAST       | 2,27     | 1,22        |
| ENSG00000239810 | PRAMEF11    | 2,27     | 1,19        |
| ENSG00000054690 | PLEKHH1     | 2,27     | 1,38        |
| ENSG00000077713 | SLC25A43    | 2,27     | 1,34        |
| ENSG00000084676 | NCOA1       | 2,27     | 1,18        |
| ENSG00000186075 | ZBPB2       | 2,27     | 1,30        |
| ENSG00000188095 | MESP2       | 2,27     | 1,23        |
| ENSG00000267855 | NDUFA7      | 2,27     | 1,57        |
| ENSG00000171621 | SPSB1       | 2,27     | 1,54        |
| ENSG00000109466 | KLHL2       | 2,27     | 1,32        |
| ENSG00000129235 | TXNDC17     | 2,27     | 1,34        |
| ENSG00000029363 | BCLAF1      | 2,27     | 1,28        |
| ENSG00000107282 | APBA1       | 2,27     | 1,24        |
| ENSG00000242732 | RGAG4       | 2,26     | 1,32        |
| ENSG00000070831 | CDC42       | 2,26     | 1,36        |
| ENSG00000131697 | NPHP4       | 2,26     | 1,16        |
| ENSG00000104626 | ERI1        | 2,26     | 1,36        |
| ENSG00000080910 | CFHR2       | 2,26     | 1,35        |
| ENSG00000155304 | HSPA13      | 2,26     | 1,23        |
| ENSG00000232838 | PET117      | 2,26     | 1,19        |
| ENSG00000100749 | VRK1        | 2,26     | 1,52        |
| ENSG00000164112 | TMEM155     | 2,26     | 1,11        |
| ENSG00000100312 | ACR         | 2,26     | 1,14        |
| ENSG00000176399 | DMRTA1      | 2,26     | 1,32        |
| ENSG00000109787 | KLF3        | 2,26     | 1,33        |

| ensembl gene    | gene symbol | Score(d) | Fold Change |
|-----------------|-------------|----------|-------------|
| ENSG00000151445 | VIPAS39     | 2,26     | 1,31        |
| ENSG00000073670 | ADAM11      | 2,26     | 1,22        |
| ENSG00000164284 | GRPEL2      | 2,25     | 1,32        |
| ENSG00000125492 | BARHL1      | 2,25     | 1,16        |
| ENSG00000205277 | MUC12       | 2,25     | 1,13        |
| ENSG00000196843 | ARID5A      | 2,25     | 1,61        |
| ENSG00000147872 | PLIN2       | 2,25     | 1,17        |
| ENSG00000179262 | RAD23A      | 2,25     | 1,17        |
| ENSG00000171103 | TRMT61B     | 2,25     | 1,32        |
| ENSG00000178125 | PPP1R42     | 2,25     | 1,11        |
| ENSG00000147457 | CHMP7       | 2,25     | 1,25        |
| ENSG00000235387 | LINC00961   | 2,25     | 1,13        |
| ENSG00000155438 | NIFK        | 2,25     | 1,29        |
| ENSG00000158156 | XKR8        | 2,25     | 1,32        |
| ENSG00000147439 | BIN3        | 2,24     | 1,31        |
| ENSG00000213047 | DENND1B     | 2,24     | 1,37        |
| ENSG00000067560 | RHOA        | 2,24     | 1,12        |
| ENSG00000183559 | C10orf120   | 2,24     | 1,16        |
| ENSG00000130338 | TULP4       | 2,24     | 1,31        |
| ENSG00000151806 | GUF1        | 2,24     | 1,29        |
| ENSG00000188191 | PRKAR1B     | 2,24     | 1,25        |
| ENSG00000196465 | MYL6B       | 2,24     | 1,28        |
| ENSG00000144566 | RAB5A       | 2,24     | 1,22        |
| ENSG00000161904 | LEMD2       | 2,24     | 1,25        |
| ENSG00000105948 | TTC26       | 2,24     | 1,26        |
| ENSG00000177989 | ODF3B       | 2,24     | 1,48        |
| ENSG00000181016 | LSMEM1      | 2,24     | 1,31        |
| ENSG00000090238 | YPEL3       | 2,24     | 1,37        |
| ENSG00000225921 | NOL7        | 2,24     | 1,23        |
| ENSG00000169813 | HNRNPF      | 2,24     | 1,20        |
| ENSG00000104976 | SNAPC2      | 2,24     | 1,16        |
| ENSG00000137673 | MMP7        | 2,24     | 1,17        |
| ENSG00000170381 | SEMA3E      | 2,24     | 1,30        |
| ENSG00000214753 | HNRNPUL2    | 2,24     | 1,57        |
| ENSG00000055211 | GINM1       | 2,23     | 1,56        |
| ENSG00000255501 | CARD18      | 2,23     | 1,15        |
| ENSG00000184908 | CLCNKB      | 2,23     | 1,28        |
| ENSG00000187848 | P2RX2       | 2,23     | 1,13        |
| ENSG00000164897 | TMUB1       | 2,23     | 1,26        |
| ENSG00000174667 | OR7D4       | 2,23     | 1,21        |
| ENSG00000099864 | PALM        | 2,23     | 1,21        |
| ENSG00000105856 | HBP1        | 2,23     | 1,34        |
| ENSG00000158639 | PAGE5       | 2,23     | 1,54        |
| ENSG00000109320 | NFKB1       | 2,23     | 1,43        |
| ENSG00000134802 | SLC43A3     | 2,23     | 1,37        |
| ENSG00000253649 | PRSS51      | 2,23     | 1,95        |
| ENSG00000106236 | NPTX2       | 2,23     | 1,18        |
| ENSG00000178974 | FBXO34      | 2,23     | 1,35        |
| ENSG00000153714 | LURAP1L     | 2,23     | 1,79        |

| ensembl gene    | gene symbol | Score(d) | Fold Change |
|-----------------|-------------|----------|-------------|
| ENSG00000173926 | 42797       | 2,23     | 1,59        |
| ENSG00000197467 | COL13A1     | 2,23     | 1,14        |
| ENSG00000188372 | ZP3         | 2,23     | 1,45        |
| ENSG00000100311 | PDGFB       | 2,22     | 1,21        |
| ENSG00000182521 | TBPL2       | 2,22     | 1,16        |
| ENSG00000131378 | RFTN1       | 2,22     | 1,37        |
| ENSG00000274736 | CCL23       | 2,22     | 1,14        |
| ENSG00000173674 | EIF1AX      | 2,22     | 1,40        |
| ENSG00000169271 | HSPB3       | 2,22     | 1,11        |
| ENSG00000205869 | KRTAP5-1    | 2,22     | 1,13        |
| ENSG00000253958 | CLDN23      | 2,22     | 1,13        |
| ENSG00000141682 | PMAIP1      | 2,22     | 2,86        |
| ENSG00000145362 | ANK2        | 2,22     | 1,35        |
| ENSG00000101222 | SPEF1       | 2,22     | 1,12        |
| ENSG00000162877 | PM20D1      | 2,22     | 1,55        |
| ENSG00000166311 | SMPD1       | 2,22     | 1,32        |
| ENSG00000147437 | GNRH1       | 2,22     | 1,21        |
| ENSG00000168615 | ADAM9       | 2,22     | 1,65        |
| ENSG00000105248 | CCDC94      | 2,22     | 1,22        |
| ENSG00000255974 | CYP2A6      | 2,22     | 1,13        |
| ENSG00000137312 | FLOT1       | 2,22     | 1,24        |
| ENSG00000163734 | CXCL3       | 2,22     | 1,16        |
| ENSG00000163900 | TMEM41A     | 2,21     | 1,37        |
| ENSG00000143753 | DEGS1       | 2,21     | 1,36        |
| ENSG00000138758 | 42989       | 2,21     | 1,37        |
| ENSG00000105605 | CACNG7      | 2,21     | 1,23        |
| ENSG00000101935 | AMMECR1     | 2,21     | 1,39        |
| ENSG00000133773 | CCDC59      | 2,21     | 1,32        |
| ENSG00000144746 | ARL6IP5     | 2,21     | 1,48        |
| ENSG00000073067 | CYP2W1      | 2,21     | 1,16        |
| ENSG00000164649 | CDCA7L      | 2,21     | 1,41        |
| ENSG00000179580 | RNF151      | 2,21     | 1,13        |
| ENSG00000151470 | C4orf33     | 2,21     | 1,52        |
| ENSG00000151338 | MIPOL1      | 2,21     | 1,11        |
| ENSG00000084070 | SMAP2       | 2,21     | 1,54        |
| ENSG00000165113 | GKAP1       | 2,21     | 1,49        |
| ENSG00000166788 | SAAL1       | 2,21     | 1,35        |
| ENSG00000105409 | ATP1A3      | 2,21     | 1,40        |
| ENSG00000101974 | ATP11C      | 2,21     | 1,36        |
| ENSG00000007171 | NOS2        | 2,20     | 1,13        |
| ENSG00000133226 | SRRM1       | 2,20     | 1,31        |
| ENSG00000159210 | SNF8        | 2,20     | 1,19        |
| ENSG00000128989 | ARPP19      | 2,20     | 1,29        |
| ENSG00000129951 | PLPPR3      | 2,20     | 1,12        |
| ENSG00000110446 | SLC15A3     | 2,20     | 1,46        |
| ENSG00000102103 | PQBP1       | 2,20     | 1,17        |
| ENSG00000038210 | PI4K2B      | 2,19     | 1,17        |
| ENSG00000168924 | LETM1       | 2,19     | 1,32        |
| ENSG00000132680 | KIAA0907    | 2,19     | 1,38        |

| ensembl gene    | gene symbol | Score(d) | Fold Change |
|-----------------|-------------|----------|-------------|
| ENSG00000171806 | METTL18     | 2,19     | 1,29        |
| ENSG00000214756 | METTL12     | 2,19     | 1,47        |
| ENSG00000090020 | SLC9A1      | 2,19     | 1,26        |
| ENSG00000154124 | OTULIN      | 2,19     | 1,32        |
| ENSG00000167272 | POP5        | 2,19     | 1,35        |
| ENSG00000131979 | GCH1        | 2,19     | 1,51        |
| ENSG00000132002 | DNAJB1      | 2,19     | 1,27        |
| ENSG00000178338 | ZNF354B     | 2,19     | 1,15        |
| ENSG00000120949 | TNFRSF8     | 2,19     | 1,15        |
| ENSG00000187398 | LUZP2       | 2,19     | 1,15        |
| ENSG00000132681 | ATP1A4      | 2,19     | 1,10        |
| ENSG00000120509 | PDZD11      | 2,19     | 1,24        |
| ENSG00000249992 | TMEM158     | 2,19     | 1,12        |
| ENSG00000188015 | S100A3      | 2,19     | 1,11        |
| ENSG00000141543 | EIF4A3      | 2,19     | 1,40        |
| ENSG00000274252 | GGTLC3      | 2,19     | 1,40        |
| ENSG00000100156 | SLC16A8     | 2,18     | 1,13        |
| ENSG00000173275 | ZNF449      | 2,18     | 1,34        |
| ENSG00000057608 | GDI2        | 2,18     | 1,24        |
| ENSG00000279745 | AL365202.1  | 2,18     | 1,37        |
| ENSG00000183734 | ASCL2       | 2,18     | 1,13        |
| ENSG00000127838 | PNKD        | 2,18     | 1,16        |
| ENSG00000117505 | DR1         | 2,18     | 1,32        |
| ENSG00000152952 | PLOD2       | 2,18     | 2,63        |
| ENSG00000151923 | TIAL1       | 2,18     | 1,16        |
| ENSG00000198689 | SLC9A6      | 2,18     | 1,26        |
| ENSG00000131203 | IDO1        | 2,18     | 1,24        |
| ENSG00000144843 | ADPRH       | 2,18     | 1,31        |
| ENSG00000198954 | KIF1BP      | 2,18     | 1,24        |
| ENSG00000171960 | PPIH        | 2,18     | 1,27        |
| ENSG00000167552 | TUBA1A      | 2,18     | 1,69        |
| ENSG00000196267 | ZNF836      | 2,18     | 1,46        |
| ENSG00000084072 | PPIE        | 2,18     | 1,26        |
| ENSG00000039123 | SKIV2L2     | 2,18     | 1,25        |
| ENSG00000172661 | FAM21C      | 2,18     | 1,23        |
| ENSG00000112130 | RNF8        | 2,18     | 1,25        |
| ENSG00000088782 | DEFB127     | 2,18     | 1,10        |
| ENSG00000276747 | PADI6       | 2,18     | 1,13        |
| ENSG00000101470 | TNNC2       | 2,18     | 1,16        |
| ENSG00000168874 | ATOH8       | 2,18     | 1,23        |
| ENSG00000239305 | RNF103      | 2,18     | 1,26        |
| ENSG00000177542 | SLC25A22    | 2,18     | 1,29        |
| ENSG00000120334 | CENPL       | 2,17     | 1,22        |
| ENSG00000142408 | CACNG8      | 2,17     | 1,16        |
| ENSG00000160886 | LY6K        | 2,17     | 1,11        |
| ENSG00000129219 | PLD2        | 2,17     | 1,29        |
| ENSG00000205642 | VCX3B       | 2,17     | 1,26        |
| ENSG00000134398 | ERN2        | 2,17     | 1,11        |
| ENSG00000119655 | NPC2        | 2,17     | 1,41        |

| ensembl gene    | gene symbol | Score(d) | Fold Change |
|-----------------|-------------|----------|-------------|
| ENSG00000123159 | GIPC1       | 2,17     | 1,19        |
| ENSG00000125779 | PANK2       | 2,17     | 1,19        |
| ENSG00000182783 | OR2T29      | 2,17     | 1,15        |
| ENSG00000104388 | RAB2A       | 2,17     | 1,20        |
| ENSG00000085465 | OVGP1       | 2,17     | 1,19        |
| ENSG00000110046 | ATG2A       | 2,17     | 1,21        |
| ENSG00000101246 | ARFRP1      | 2,17     | 1,15        |
| ENSG00000173599 | PC          | 2,17     | 1,22        |
| ENSG00000100033 | PRODH       | 2,17     | 1,16        |
| ENSG00000179284 | DAND5       | 2,17     | 1,12        |
| ENSG00000167670 | CHAF1A      | 2,17     | 1,29        |
| ENSG00000177096 | FAM109B     | 2,17     | 1,18        |
| ENSG00000119919 | NKX2-3      | 2,17     | 1,10        |
| ENSG00000205220 | PSMB10      | 2,17     | 1,26        |
| ENSG00000114646 | CSPG5       | 2,17     | 1,15        |
| ENSG00000167011 | NAT16       | 2,16     | 1,12        |
| ENSG00000134453 | RBM17       | 2,16     | 1,30        |
| ENSG00000162971 | TYW5        | 2,16     | 1,29        |
| ENSG00000099889 | ARVCF       | 2,16     | 1,14        |
| ENSG00000106624 | AEBP1       | 2,16     | 1,11        |
| ENSG00000115415 | STAT1       | 2,16     | 1,38        |
| ENSG00000145220 | LYAR        | 2,16     | 1,42        |
| ENSG00000138698 | RAP1GDS1    | 2,16     | 1,29        |
| ENSG00000170776 | AKAP13      | 2,16     | 1,38        |
| ENSG00000169991 | IFFO2       | 2,16     | 1,40        |
| ENSG00000104907 | TRMT1       | 2,16     | 1,34        |
| ENSG00000135108 | FBXO21      | 2,16     | 1,22        |
| ENSG00000170891 | CYTL1       | 2,16     | 1,24        |
| ENSG00000116906 | GNPAT       | 2,16     | 1,27        |
| ENSG00000115641 | FHL2        | 2,16     | 1,18        |
| ENSG00000100319 | ZMAT5       | 2,16     | 1,17        |
| ENSG00000039068 | CDH1        | 2,16     | 2,09        |
| ENSG00000156968 | MPV17L      | 2,16     | 1,40        |
| ENSG00000135472 | FAIM2       | 2,16     | 1,17        |
| ENSG00000117362 | APH1A       | 2,16     | 1,28        |
| ENSG00000165995 | CACNB2      | 2,16     | 1,18        |
| ENSG00000130204 | TOMM40      | 2,16     | 1,21        |
| ENSG00000106462 | EZH2        | 2,16     | 1,42        |
| ENSG00000241123 | KRTAP10-5   | 2,16     | 1,20        |
| ENSG00000151023 | ENKUR       | 2,16     | 1,15        |
| ENSG00000183347 | GBP6        | 2,16     | 1,34        |
| ENSG00000163518 | FCRL4       | 2,15     | 1,25        |
| ENSG00000108443 | RPS6KB1     | 2,15     | 1,25        |
| ENSG00000005812 | FBXL3       | 2,15     | 1,35        |
| ENSG00000138433 | CIR1        | 2,15     | 1,27        |
| ENSG00000206104 | KRTAP20-3   | 2,15     | 1,16        |
| ENSG00000221968 | FADS3       | 2,15     | 1,32        |
| ENSG00000141977 | CIB3        | 2,15     | 1,12        |
| ENSG00000099917 | MED15       | 2,15     | 1,22        |

| ensembl gene    | gene symbol | Score(d) | Fold Change |
|-----------------|-------------|----------|-------------|
| ENSG00000171863 | RPS7        | 2,15     | 1,16        |
| ENSG00000089009 | RPL6        | 2,15     | 1,39        |
| ENSG00000141456 | PELP1       | 2,15     | 1,32        |
| ENSG00000115561 | CHMP3       | 2,15     | 1,66        |
| ENSG00000221858 | OR2A12      | 2,15     | 1,11        |
| ENSG00000100867 | DHRS2       | 2,15     | 1,12        |
| ENSG00000170791 | CHCHD7      | 2,15     | 1,41        |
| ENSG00000118620 | ZNF430      | 2,15     | 1,54        |
| ENSG00000175820 | CCDC168     | 2,14     | 1,09        |
| ENSG00000114491 | UMPS        | 2,14     | 1,21        |
| ENSG00000171425 | ZNF581      | 2,14     | 1,36        |
| ENSG00000203326 | ZNF525      | 2,14     | 1,53        |
| ENSG00000165527 | ARF6        | 2,14     | 1,22        |
| ENSG00000132664 | POLR3F      | 2,14     | 1,34        |
| ENSG00000186895 | FGF3        | 2,14     | 1,15        |
| ENSG00000198431 | TXNRD1      | 2,14     | 1,22        |
| ENSG00000005102 | MEOX1       | 2,14     | 1,14        |
| ENSG00000176986 | SEC24C      | 2,14     | 1,15        |
| ENSG00000177202 | SPACA4      | 2,14     | 1,10        |
| ENSG00000204946 | ZNF783      | 2,14     | 1,26        |
| ENSG00000167780 | SOAT2       | 2,14     | 1,19        |
| ENSG00000169488 | OR4K15      | 2,14     | 1,10        |
| ENSG00000163660 | CCNL1       | 2,14     | 1,21        |
| ENSG00000133124 | IRS4        | 2,14     | 1,22        |
| ENSG00000067840 | PDZD4       | 2,14     | 1,14        |
| ENSG00000100079 | LGALS2      | 2,14     | 1,18        |
| ENSG00000157349 | DDX19B      | 2,13     | 1,29        |
| ENSG00000171872 | KLF17       | 2,13     | 1,15        |
| ENSG00000196428 | TSC22D2     | 2,13     | 1,45        |
| ENSG00000124486 | USP9X       | 2,13     | 1,30        |
| ENSG00000144681 | STAC        | 2,13     | 1,30        |
| ENSG00000185753 | CXorf38     | 2,13     | 1,22        |
| ENSG00000196136 | SERPINA3    | 2,13     | 1,30        |
| ENSG00000184160 | ADRA2C      | 2,13     | 1,12        |
| ENSG00000196387 | ZNF140      | 2,13     | 1,50        |
| ENSG00000112238 | PRDM13      | 2,13     | 1,15        |
| ENSG00000136939 | OR1L4       | 2,13     | 1,23        |
| ENSG00000088247 | KHSRP       | 2,13     | 1,17        |
| ENSG00000004779 | NDUFAB1     | 2,12     | 1,22        |
| ENSG00000092199 | HNRNPC      | 2,12     | 1,24        |
| ENSG00000162585 | FAAP20      | 2,12     | 1,16        |
| ENSG00000121064 | SCPEP1      | 2,12     | 1,46        |
| ENSG00000155868 | MED7        | 2,12     | 1,17        |
| ENSG00000167565 | SERTAD3     | 2,12     | 1,27        |
| ENSG00000143337 | TOR1AIP1    | 2,12     | 1,23        |
| ENSG00000156384 | SFR1        | 2,12     | 1,42        |
| ENSG00000170315 | UBB         | 2,12     | 1,71        |
| ENSG00000238205 | MPC1L       | 2,12     | 1,11        |
| ENSG00000150045 | KLRF1       | 2,12     | 2,17        |

| ensembl gene    | gene symbol   | Score(d) | Fold Change |
|-----------------|---------------|----------|-------------|
| ENSG00000143164 | DCAF6         | 2,12     | 1,27        |
| ENSG00000115840 | SLC25A12      | 2,12     | 1,26        |
| ENSG00000101057 | MYBL2         | 2,12     | 1,32        |
| ENSG00000198399 | ITSN2         | 2,12     | 1,18        |
| ENSG00000198911 | SREBF2        | 2,12     | 1,22        |
| ENSG00000141526 | SLC16A3       | 2,12     | 1,56        |
| ENSG00000158122 | AAED1         | 2,12     | 1,46        |
| ENSG00000155636 | RBM45         | 2,12     | 1,23        |
| ENSG00000198133 | TMEM229B      | 2,12     | 1,23        |
| ENSG00000113851 | CRBN          | 2,12     | 1,18        |
| ENSG00000131808 | FSHB          | 2,12     | 1,15        |
| ENSG00000119686 | FLVCR2        | 2,11     | 1,19        |
| ENSG00000140320 | BAHD1         | 2,11     | 1,22        |
| ENSG00000197838 | CYP2A13       | 2,11     | 1,14        |
| ENSG00000102034 | ELF4          | 2,11     | 1,51        |
| ENSG00000117528 | ABCD3         | 2,11     | 1,35        |
| ENSG00000250378 | RP11-119J18.1 | 2,11     | 1,13        |
| ENSG00000154370 | TRIM11        | 2,11     | 1,23        |
| ENSG00000196517 | SLC6A9        | 2,11     | 1,44        |
| ENSG00000112081 | SRSF3         | 2,11     | 1,14        |
| ENSG00000123595 | RAB9A         | 2,11     | 1,30        |
| ENSG00000152102 | FAM168B       | 2,11     | 1,18        |
| ENSG00000175324 | LSM1          | 2,11     | 1,24        |
| ENSG00000168275 | COA6          | 2,11     | 1,33        |
| ENSG00000214087 | ARL16         | 2,11     | 1,25        |
| ENSG00000122965 | RBM19         | 2,11     | 1,36        |
| ENSG00000153292 | ADGRF1        | 2,11     | 1,17        |
| ENSG00000187824 | TMEM220       | 2,11     | 1,57        |
| ENSG00000173141 | MRPL57        | 2,10     | 1,29        |
| ENSG00000144233 | AMMECR1L      | 2,10     | 1,18        |
| ENSG00000179528 | LBX2          | 2,10     | 1,20        |
| ENSG00000132718 | SYT11         | 2,10     | 1,24        |
| ENSG00000101596 | SMCHD1        | 2,10     | 1,20        |
| ENSG00000169126 | ARMC4         | 2,10     | 1,55        |
| ENSG00000174448 | STARD6        | 2,10     | 1,21        |
| ENSG00000213928 | IRF9          | 2,10     | 1,29        |
| ENSG00000185158 | LRRC37B       | 2,10     | 1,30        |
| ENSG00000140374 | ETFA          | 2,10     | 1,29        |
| ENSG00000257057 | C11orf97      | 2,10     | 1,10        |
| ENSG00000121350 | PYROXD1       | 2,10     | 1,37        |
| ENSG00000163395 | IGFN1         | 2,10     | 1,26        |
| ENSG00000203784 | LELP1         | 2,10     | 1,11        |
| ENSG00000153774 | CFDP1         | 2,10     | 1,26        |
| ENSG00000140829 | DHX38         | 2,09     | 1,19        |
| ENSG00000080815 | PSEN1         | 2,09     | 1,27        |
| ENSG00000185104 | FAF1          | 2,09     | 1,25        |
| ENSG00000217442 | SYCE3         | 2,09     | 1,14        |
| ENSG00000129038 | LOXL1         | 2,09     | 1,23        |
| ENSG00000091664 | SLC17A6       | 2,09     | 1,22        |

| ensembl gene    | gene symbol | Score(d) | Fold Change |
|-----------------|-------------|----------|-------------|
| ENSG00000043591 | ADRB1       | 2,09     | 1,18        |
| ENSG00000147036 | LANCL3      | 2,09     | 1,16        |
| ENSG00000066230 | SLC9A3      | 2,09     | 1,11        |
| ENSG00000156030 | ELMSAN1     | 2,09     | 1,27        |
| ENSG00000156671 | SAMD8       | 2,09     | 1,33        |
| ENSG00000145425 | RPS3A       | 2,09     | 1,22        |
| ENSG00000125351 | UPF3B       | 2,09     | 1,14        |
| ENSG00000105821 | DNAJC2      | 2,09     | 1,22        |
| ENSG00000137463 | MGARP       | 2,09     | 1,14        |
| ENSG00000159884 | CCDC107     | 2,09     | 1,16        |
| ENSG00000164175 | SLC45A2     | 2,09     | 1,24        |
| ENSG00000178078 | STAP2       | 2,09     | 1,29        |
| ENSG00000198668 | CALM1       | 2,09     | 1,37        |
| ENSG00000157823 | AP3S2       | 2,09     | 1,28        |
| ENSG00000182220 | ATP6AP2     | 2,09     | 1,28        |
| ENSG00000143891 | GALM        | 2,09     | 1,65        |
| ENSG00000255713 | OR4D2       | 2,09     | 1,19        |
| ENSG00000126777 | KTN1        | 2,09     | 1,30        |
| ENSG00000135829 | DHX9        | 2,09     | 1,21        |
| ENSG00000146926 | ASB10       | 2,09     | 1,12        |
| ENSG00000132294 | EFR3A       | 2,09     | 1,18        |
| ENSG00000100416 | TRMU        | 2,09     | 1,16        |
| ENSG00000103067 | ESRP2       | 2,09     | 1,30        |
| ENSG00000155975 | VPS37A      | 2,09     | 1,28        |
| ENSG00000204950 | LRRC10B     | 2,09     | 1,13        |
| ENSG00000166455 | C16orf46    | 2,08     | 1,19        |
| ENSG00000174611 | KY          | 2,08     | 1,25        |
| ENSG00000171970 | ZNF57       | 2,08     | 1,29        |
| ENSG00000125903 | DEFB129     | 2,08     | 1,09        |
| ENSG00000092010 | PSME1       | 2,08     | 1,21        |
| ENSG00000107164 | FUBP3       | 2,08     | 1,14        |
| ENSG00000139433 | GLTP        | 2,08     | 1,18        |
| ENSG00000145217 | SLC26A1     | 2,08     | 1,18        |
| ENSG00000100987 | VSX1        | 2,08     | 1,18        |
| ENSG00000138592 | USP8        | 2,08     | 1,23        |
| ENSG00000279804 | PRAMEF18    | 2,08     | 1,23        |
| ENSG00000130826 | DKC1        | 2,08     | 1,25        |
| ENSG00000197061 | HIST1H4C    | 2,08     | 1,37        |
| ENSG00000169189 | NSMCE1      | 2,08     | 1,37        |
| ENSG00000106546 | AHR         | 2,08     | 2,14        |
| ENSG00000183668 | PSG9        | 2,08     | 1,21        |
| ENSG00000167588 | GPD1        | 2,08     | 1,16        |
| ENSG00000138678 | GPAT3       | 2,08     | 1,28        |
| ENSG00000111145 | ELK3        | 2,08     | 1,37        |
| ENSG00000065060 | UHRF1BP1    | 2,08     | 1,25        |
| ENSG00000108010 | GLRX3       | 2,08     | 1,23        |
| ENSG00000215114 | UBXN2B      | 2,08     | 1,30        |
| ENSG00000172742 | OR4D9       | 2,08     | 1,13        |
| ENSG00000102125 | TAZ         | 2,08     | 1,19        |



| ensembl gene    | gene symbol | Score(d) | Fold Change |
|-----------------|-------------|----------|-------------|
| ENSG00000259956 | RBM15B      | 2,08     | 1,13        |
| ENSG00000156853 | ZNF689      | 2,08     | 1,21        |
| ENSG00000196950 | SLC39A10    | 2,08     | 1,34        |
| ENSG00000247595 | SPTY2D1-AS1 | 2,07     | 1,19        |
| ENSG00000149600 | COMMD7      | 2,07     | 1,21        |
| ENSG00000120925 | RNF170      | 2,07     | 1,21        |
| ENSG00000071051 | NCK2        | 2,07     | 1,30        |
| ENSG00000117151 | CTBS        | 2,07     | 1,30        |
| ENSG00000133636 | NTS         | 2,07     | 1,12        |
| ENSG00000159208 | CIART       | 2,07     | 1,61        |
| ENSG00000174227 | PIGG        | 2,07     | 1,28        |
| ENSG00000107819 | SFXN3       | 2,07     | 1,28        |
| ENSG00000139684 | ESD         | 2,07     | 1,32        |
| ENSG00000174599 | TRAM1L1     | 2,07     | 1,17        |
| ENSG00000134759 | ELP2        | 2,07     | 1,28        |
| ENSG00000170775 | GPR37       | 2,07     | 1,44        |
| ENSG00000137252 | HCRT2       | 2,07     | 1,12        |
| ENSG00000143162 | CREG1       | 2,07     | 1,32        |
| ENSG00000130544 | ZNF557      | 2,07     | 1,21        |
| ENSG00000131773 | KHDRBS3     | 2,07     | 1,55        |
| ENSG00000184032 | KRTAP20-2   | 2,07     | 1,14        |
| ENSG00000181585 | TMIE        | 2,07     | 1,12        |
| ENSG00000175213 | ZNF408      | 2,06     | 1,24        |
| ENSG00000134987 | WDR36       | 2,06     | 1,21        |
| ENSG00000189266 | PNRC2       | 2,06     | 1,14        |
| ENSG00000133328 | HRASLS2     | 2,06     | 1,86        |
| ENSG00000050130 | JKAMP       | 2,06     | 1,23        |
| ENSG00000176194 | CIDEA       | 2,06     | 1,10        |
| ENSG00000074695 | LMAN1       | 2,06     | 1,22        |
| ENSG00000117601 | SERPINC1    | 2,06     | 1,12        |
| ENSG00000122482 | ZNF644      | 2,06     | 1,28        |
| ENSG00000125746 | EML2        | 2,06     | 1,21        |
| ENSG00000197566 | ZNF624      | 2,06     | 1,23        |
| ENSG00000156127 | BATF        | 2,06     | 1,18        |
| ENSG00000167617 | CDC42EP5    | 2,06     | 1,15        |
| ENSG00000109610 | SOD3        | 2,06     | 1,22        |
| ENSG00000172197 | MBOAT1      | 2,06     | 1,67        |
| ENSG00000166349 | RAG1        | 2,06     | 1,11        |
| ENSG00000118181 | RPS25       | 2,06     | 1,32        |
| ENSG00000141971 | MVB12A      | 2,06     | 1,27        |
| ENSG00000155096 | AZIN1       | 2,06     | 1,28        |
| ENSG00000174748 | RPL15       | 2,06     | 1,21        |
| ENSG00000073050 | XRCC1       | 2,05     | 1,20        |
| ENSG00000102879 | CORO1A      | 2,05     | 1,37        |
| ENSG00000140931 | CMTM3       | 2,05     | 1,55        |
| ENSG00000204070 | SYS1        | 2,05     | 1,26        |
| ENSG00000177156 | TALDO1      | 2,05     | 1,24        |
| ENSG00000114268 | PFKFB4      | 2,05     | 1,18        |
| ENSG00000223638 | RFPL4A      | 2,05     | 1,15        |

| ensembl gene    | gene symbol | Score(d) | Fold Change |
|-----------------|-------------|----------|-------------|
| ENSG00000187969 | ZCCHC13     | 2,05     | 1,14        |
| ENSG00000167566 | NCKAP5L     | 2,05     | 1,16        |
| ENSG00000149532 | CPSF7       | 2,05     | 1,28        |
| ENSG00000120705 | ETF1        | 2,05     | 1,19        |
| ENSG00000185028 | LRRC14B     | 2,05     | 1,11        |
| ENSG00000003096 | KLHL13      | 2,05     | 1,21        |
| ENSG00000258366 | RTEL1       | 2,05     | 1,14        |
| ENSG00000132591 | ERAL1       | 2,05     | 1,28        |
| ENSG00000155363 | MOV10       | 2,04     | 1,43        |
| ENSG00000077454 | LRCH4       | 2,04     | 1,23        |
| ENSG00000163071 | SPATA18     | 2,04     | 1,23        |
| ENSG00000237693 | IRGM        | 2,04     | 1,31        |
| ENSG00000100191 | SLC5A4      | 2,04     | 1,14        |
| ENSG00000005486 | RHBDD2      | 2,04     | 1,22        |
| ENSG00000101448 | EPPIN       | 2,04     | 1,25        |
| ENSG00000170075 | GPR37L1     | 2,04     | 1,12        |
| ENSG00000111615 | KRR1        | 2,04     | 1,27        |
| ENSG00000165322 | ARHGAP12    | 2,04     | 1,31        |
| ENSG00000164440 | TXLNB       | 2,04     | 1,46        |
| ENSG00000197826 | C4orf22     | 2,04     | 1,19        |
| ENSG00000125845 | BMP2        | 2,04     | 1,17        |
| ENSG00000105643 | ARRDC2      | 2,03     | 1,33        |
| ENSG00000163602 | RYBP        | 2,03     | 1,31        |
| ENSG00000131668 | BARX1       | 2,03     | 1,13        |
| ENSG00000102189 | EEA1        | 2,03     | 1,38        |
| ENSG00000239282 | GATSL3      | 2,03     | 1,42        |
| ENSG00000100077 | GRK3        | 2,03     | 1,44        |
| ENSG00000112365 | ZBTB24      | 2,03     | 1,24        |
| ENSG00000167822 | OR8J3       | 2,03     | 1,11        |
| ENSG00000134330 | IAH1        | 2,03     | 1,18        |
| ENSG00000135968 | GCC2        | 2,03     | 1,23        |
| ENSG00000110367 | DDX6        | 2,03     | 1,19        |
| ENSG00000111058 | ACSS3       | 2,03     | 1,44        |
| ENSG00000116161 | CACYBP      | 2,03     | 1,22        |
| ENSG00000140937 | CDH11       | 2,03     | 1,18        |
| ENSG00000111701 | APOBEC1     | 2,03     | 1,13        |
| ENSG00000110880 | CORO1C      | 2,03     | 1,37        |
| ENSG00000169359 | SLC33A1     | 2,03     | 1,35        |
| ENSG00000162039 | MEIOB       | 2,03     | 1,12        |
| ENSG00000162931 | TRIM17      | 2,03     | 1,15        |
| ENSG00000243156 | MICAL3      | 2,02     | 1,30        |
| ENSG00000082701 | GSK3B       | 2,02     | 1,18        |
| ENSG00000068885 | IFT80       | 2,02     | 1,38        |
| ENSG00000174886 | NDUFA11     | 2,02     | 1,19        |
| ENSG00000074935 | TUBE1       | 2,02     | 1,28        |
| ENSG00000149582 | TMEM25      | 2,02     | 1,22        |
| ENSG00000205208 | C4orf46     | 2,02     | 1,22        |
| ENSG00000080573 | COL5A3      | 2,02     | 1,15        |
| ENSG00000188766 | SPRED3      | 2,02     | 1,20        |

| ensembl gene    | gene symbol | Score(d) | Fold Change |
|-----------------|-------------|----------|-------------|
| ENSG00000152495 | CAMK4       | 2,02     | 1,60        |
| ENSG00000093010 | COMT        | 2,02     | 1,22        |
| ENSG00000105819 | PMPCB       | 2,02     | 1,17        |
| ENSG00000181085 | MAPK15      | 2,02     | 1,13        |
| ENSG00000198589 | LRBA        | 2,02     | 1,23        |
| ENSG00000162771 | FAM71A      | 2,02     | 1,37        |
| ENSG00000253250 | C8orf88     | 2,02     | 1,57        |
| ENSG00000124406 | ATP8A1      | 2,02     | 1,53        |
| ENSG00000213397 | HAUS7       | 2,02     | 1,71        |
| ENSG00000196588 | MKL1        | 2,02     | 1,25        |
| ENSG00000167395 | ZNF646      | 2,02     | 1,18        |
| ENSG00000015676 | NUDCD3      | 2,02     | 1,29        |
| ENSG00000197045 | GMFB        | 2,02     | 1,33        |
| ENSG00000077514 | POLD3       | 2,02     | 1,43        |
| ENSG00000180138 | CSNK1A1L    | 2,02     | 1,11        |
| ENSG00000073060 | SCARB1      | 2,01     | 1,48        |
| ENSG00000167910 | CYP7A1      | 2,01     | 1,12        |
| ENSG00000182447 | OTOL1       | 2,01     | 1,14        |
| ENSG00000162882 | HAAO        | 2,01     | 1,22        |
| ENSG00000130939 | UBE4B       | 2,01     | 1,18        |
| ENSG00000097033 | SH3GLB1     | 2,01     | 1,28        |
| ENSG00000168875 | SOX14       | 2,01     | 1,10        |
| ENSG00000131051 | RBM39       | 2,01     | 1,21        |
| ENSG00000128789 | PSMG2       | 2,01     | 1,20        |
| ENSG00000231068 | KRTAP21-3   | 2,01     | 1,14        |
| ENSG00000197747 | S100A10     | 2,01     | 1,75        |
| ENSG00000057663 | ATG5        | 2,01     | 1,19        |
| ENSG00000123080 | CDKN2C      | 2,01     | 1,80        |
| ENSG00000018869 | ZNF582      | 2,01     | 1,26        |
| ENSG00000187581 | COX8C       | 2,01     | 1,11        |
| ENSG00000078795 | PKD2L2      | 2,01     | 1,29        |
| ENSG00000133687 | TMTC1       | 2,01     | 1,63        |
| ENSG00000164871 | SPAG11B     | 2,01     | 1,24        |
| ENSG00000101400 | SNTA1       | 2,01     | 1,18        |
| ENSG00000061455 | PRDM6       | 2,01     | 1,21        |
| ENSG00000102312 | PORCN       | 2,01     | 1,22        |
| ENSG00000041357 | PSMA4       | 2,01     | 1,39        |
| ENSG00000067082 | KLF6        | 2,01     | 1,40        |
| ENSG00000018408 | WWTR1       | 2,01     | 1,26        |
| ENSG00000117616 | RSRP1       | 2,01     | 1,29        |
| ENSG00000007216 | SLC13A2     | 2,01     | 1,09        |
| ENSG00000183665 | TRMT12      | 2,00     | 1,20        |
| ENSG00000253506 | NACA2       | 2,00     | 1,13        |
| ENSG00000204130 | RUFY2       | 2,00     | 1,20        |
| ENSG00000114573 | ATP6V1A     | 2,00     | 1,29        |
| ENSG00000170855 | TRIAP1      | 2,00     | 1,25        |
| ENSG00000204642 | HLA-F       | 2,00     | 1,20        |
| ENSG00000198807 | PAX9        | 2,00     | 1,14        |
| ENSG00000169297 | NROB1       | 2,00     | 1,13        |

| ensembl gene    | gene symbol | Score(d) | Fold Change |
|-----------------|-------------|----------|-------------|
| ENSG00000205730 | ITPRIPL2    | 2,00     | 1,21        |
| ENSG00000175946 | KLHL38      | 2,00     | 1,10        |
| ENSG00000106682 | EIF4H       | 2,00     | 1,30        |
| ENSG00000131055 | COX4I2      | 2,00     | 1,16        |
| ENSG00000096060 | FKBP5       | 2,00     | 1,54        |
| ENSG00000092964 | DPYSL2      | 2,00     | 1,81        |
| ENSG00000106483 | SFRP4       | 2,00     | 1,14        |
| ENSG00000133731 | IMPA1       | 2,00     | 1,22        |
| ENSG00000100889 | PCK2        | 2,00     | 1,49        |
| ENSG00000273899 | NOL12       | 2,00     | 1,31        |
| ENSG00000106268 | NUDT1       | 2,00     | 1,16        |
| ENSG00000162368 | CMPK1       | 2,00     | 1,21        |
| ENSG00000130303 | BST2        | 2,00     | 1,41        |
| ENSG00000142279 | WTIP        | 2,00     | 1,09        |
| ENSG00000183092 | BEGAIN      | 1,99     | 1,22        |
| ENSG00000110436 | SLC1A2      | 1,99     | 1,11        |
| ENSG00000155508 | CNOT8       | 1,99     | 1,21        |
| ENSG00000164535 | DAGLB       | 1,99     | 1,27        |
| ENSG00000137959 | IFI44L      | 1,99     | 2,36        |
| ENSG00000171603 | CLSTN1      | 1,99     | 1,19        |
| ENSG00000163629 | PTPN13      | 1,99     | 1,85        |
| ENSG00000022840 | RNF10       | 1,99     | 1,21        |
| ENSG00000243130 | PSG11       | 1,99     | 1,13        |
| ENSG00000164411 | GJB7        | 1,99     | 1,13        |
| ENSG00000115361 | ACADL       | 1,99     | 1,16        |
| ENSG00000205795 | CYS1        | 1,99     | 1,17        |
| ENSG00000167311 | ART5        | 1,99     | 1,16        |
| ENSG00000110330 | BIRC2       | 1,99     | 1,31        |
| ENSG00000177707 | NECTIN3     | 1,99     | 1,69        |
| ENSG00000184743 | ATL3        | 1,99     | 1,19        |
| ENSG00000167244 | IGF2        | 1,99     | 1,22        |
| ENSG00000100410 | PHF5A       | 1,99     | 1,21        |
| ENSG00000166090 | IL25        | 1,99     | 1,13        |
| ENSG00000160352 | ZNF714      | 1,99     | 1,33        |
| ENSG00000160654 | CD3G        | 1,99     | 1,13        |
| ENSG00000204022 | LIPJ        | 1,99     | 1,35        |
| ENSG00000169021 | UQCRFS1     | 1,99     | 1,15        |
| ENSG00000205867 | KRTAP5-2    | 1,99     | 1,17        |
| ENSG00000119446 | RBM18       | 1,99     | 1,21        |
| ENSG00000139899 | CBLN3       | 1,99     | 1,23        |
| ENSG00000175087 | PDIK1L      | 1,99     | 1,23        |
| ENSG00000248487 | ABHD14A     | 1,99     | 1,20        |
| ENSG00000082458 | DLG3        | 1,99     | 1,36        |
| ENSG00000145293 | ENOPH1      | 1,99     | 1,19        |
| ENSG00000164182 | NDUFAF2     | 1,99     | 1,26        |
| ENSG00000196453 | ZNF777      | 1,98     | 1,13        |
| ENSG00000099203 | TMED1       | 1,98     | 1,14        |
| ENSG00000102055 | PPP1R2P9    | 1,98     | 1,09        |
| ENSG00000112462 | OR12D3      | 1,98     | 1,07        |

| ensembl gene    | gene symbol | Score(d) | Fold Change |
|-----------------|-------------|----------|-------------|
| ENSG00000167360 | OR51Q1      | 1,98     | 1,11        |
| ENSG00000173705 | SUSD5       | 1,98     | 1,14        |
| ENSG00000206013 | IFITM5      | 1,98     | 1,12        |
| ENSG00000173442 | EHBP1L1     | 1,98     | 1,27        |
| ENSG00000158270 | COLEC12     | 1,98     | 1,36        |
| ENSG00000139645 | ANKRD52     | 1,98     | 1,18        |
| ENSG00000104892 | KLC3        | 1,98     | 1,25        |
| ENSG00000121964 | GTDC1       | 1,98     | 1,41        |
| ENSG00000119844 | AFTPH       | 1,98     | 1,15        |
| ENSG00000164816 | DEFA5       | 1,98     | 1,13        |
| ENSG00000168071 | CCDC88B     | 1,98     | 1,16        |
| ENSG00000172830 | SSH3        | 1,98     | 1,30        |
| ENSG00000101230 | ISM1        | 1,98     | 1,11        |
| ENSG00000065621 | GSTO2       | 1,98     | 1,35        |
| ENSG00000263429 | LINC00675   | 1,98     | 1,13        |
| ENSG00000164402 | 42986       | 1,98     | 1,30        |
| ENSG00000152234 | ATP5A1      | 1,98     | 1,23        |
| ENSG00000186146 | DEFB131     | 1,98     | 1,29        |
| ENSG00000262246 | CORO7       | 1,98     | 1,25        |
| ENSG00000109471 | IL2         | 1,98     | 1,10        |
| ENSG00000188585 | LINC00083   | 1,98     | 1,19        |
| ENSG00000138684 | IL21        | 1,98     | 1,08        |
| ENSG00000185803 | SLC52A2     | 1,98     | 1,23        |
| ENSG00000104889 | RNASEH2A    | 1,98     | 1,28        |
| ENSG00000156535 | CD109       | 1,98     | 1,53        |
| ENSG00000120008 | WDR11       | 1,97     | 1,33        |
| ENSG00000221859 | KRTAP10-10  | 1,97     | 1,15        |
| ENSG00000153207 | AHCTF1      | 1,97     | 1,24        |
| ENSG00000151611 | MMAA        | 1,97     | 1,21        |
| ENSG00000138760 | SCARB2      | 1,97     | 1,30        |
| ENSG00000164645 | C7orf62     | 1,97     | 1,12        |
| ENSG00000150753 | CCT5        | 1,97     | 1,44        |
| ENSG00000184735 | DDX53       | 1,97     | 1,31        |
| ENSG00000138185 | ENTPD1      | 1,97     | 2,50        |
| ENSG00000112149 | CD83        | 1,97     | 1,53        |
| ENSG00000069974 | RAB27A      | 1,97     | 1,42        |
| ENSG00000101200 | AVP         | 1,97     | 1,11        |
| ENSG00000179796 | LRR3B       | 1,97     | 1,17        |
| ENSG00000197170 | PSMD12      | 1,97     | 1,19        |
| ENSG00000198054 | DSCR8       | 1,97     | 1,89        |
| ENSG00000114857 | NKTR        | 1,97     | 1,17        |
| ENSG00000115350 | POLE4       | 1,97     | 1,21        |
| ENSG00000143368 | SF3B4       | 1,96     | 1,24        |
| ENSG00000203760 | CENPW       | 1,96     | 1,35        |
| ENSG00000162378 | ZYG11B      | 1,96     | 1,23        |
| ENSG00000179593 | ALOX15B     | 1,96     | 1,11        |
| ENSG00000171302 | CANT1       | 1,96     | 1,14        |
| ENSG00000145113 | MUC4        | 1,96     | 1,29        |
| ENSG00000204922 | UQCC3       | 1,96     | 1,13        |

| ensembl gene    | gene symbol | Score(d) | Fold Change |
|-----------------|-------------|----------|-------------|
| ENSG00000143952 | VPS54       | 1,96     | 1,23        |
| ENSG00000120860 | CCDC53      | 1,96     | 1,23        |
| ENSG00000148204 | CRB2        | 1,96     | 1,12        |
| ENSG00000255398 | HCAR3       | 1,96     | 1,15        |
| ENSG00000169583 | CLIC3       | 1,96     | 1,11        |
| ENSG00000198182 | ZNF607      | 1,96     | 1,29        |
| ENSG00000085433 | WDR47       | 1,96     | 1,44        |
| ENSG00000278889 | OR2S2       | 1,96     | 1,14        |
| ENSG00000143106 | PSMA5       | 1,96     | 1,25        |
| ENSG00000183378 | OVCH2       | 1,95     | 1,11        |
| ENSG00000125482 | TTF1        | 1,95     | 1,21        |
| ENSG00000013583 | HEBP1       | 1,95     | 1,28        |
| ENSG00000261857 | MIA         | 1,95     | 1,63        |
| ENSG00000100906 | NFKBIA      | 1,95     | 1,46        |
| ENSG00000169131 | ZNF354A     | 1,95     | 1,26        |
| ENSG00000004766 | VPS50       | 1,95     | 1,17        |
| ENSG00000188694 | KRTAP24-1   | 1,95     | 1,11        |
| ENSG00000151422 | FER         | 1,95     | 1,32        |
| ENSG00000172724 | CCL19       | 1,95     | 1,17        |
| ENSG00000249222 | ATP5L2      | 1,95     | 1,19        |
| ENSG00000155368 | DBI         | 1,95     | 1,29        |
| ENSG00000147434 | CHRNA6      | 1,95     | 1,23        |
| ENSG00000107731 | UNC5B       | 1,95     | 1,22        |
| ENSG00000161671 | EMC10       | 1,95     | 1,21        |
| ENSG00000041988 | THAP3       | 1,95     | 1,23        |
| ENSG00000100865 | CINP        | 1,95     | 1,28        |
| ENSG00000186603 | HPDL        | 1,95     | 1,20        |
| ENSG00000198492 | YTHDF2      | 1,95     | 1,16        |
| ENSG00000105671 | DDX49       | 1,95     | 1,19        |
| ENSG00000079156 | OSBPL6      | 1,95     | 1,41        |
| ENSG00000262628 | OR1D5       | 1,95     | 1,22        |
| ENSG00000159763 | PIP         | 1,94     | 1,10        |
| ENSG00000126778 | SIX1        | 1,94     | 1,20        |
| ENSG00000176979 | TRIM60      | 1,94     | 1,11        |
| ENSG00000054654 | SYNE2       | 1,94     | 1,50        |
| ENSG00000147145 | LPAR4       | 1,94     | 1,17        |
| ENSG00000117152 | RGS4        | 1,94     | 1,16        |
| ENSG00000173825 | TIGD3       | 1,94     | 1,11        |
| ENSG00000159182 | PRAC1       | 1,94     | 1,14        |
| ENSG00000185728 | YTHDF3      | 1,94     | 1,16        |
| ENSG00000141994 | DUS3L       | 1,94     | 1,18        |
| ENSG00000154227 | CERS3       | 1,94     | 1,16        |
| ENSG00000157181 | C1orf27     | 1,94     | 1,26        |
| ENSG00000120694 | HSPH1       | 1,94     | 1,33        |
| ENSG00000134644 | PUM1        | 1,94     | 1,18        |
| ENSG00000129675 | ARHGEF6     | 1,94     | 1,60        |
| ENSG00000205445 | KRTAP10-2   | 1,94     | 1,14        |
| ENSG00000163440 | PDCL2       | 1,94     | 1,24        |
| ENSG00000198040 | ZNF84       | 1,94     | 1,36        |

| ensembl gene     | gene symbol | Score(d) | Fold Change |
|------------------|-------------|----------|-------------|
| ENSG00000012124  | CD22        | 1,94     | 1,28        |
| ENSG000000135336 | ORC3        | 1,94     | 1,24        |
| ENSG000000137843 | PAK6        | 1,94     | 1,44        |
| ENSG000000151962 | RBM46       | 1,94     | 1,13        |
| ENSG000000184863 | RBM33       | 1,93     | 1,19        |
| ENSG000000163374 | YY1AP1      | 1,93     | 1,32        |
| ENSG000000182903 | ZNF721      | 1,93     | 1,40        |
| ENSG000000214787 | MS4A4E      | 1,93     | 1,37        |
| ENSG000000255009 | UBTFL1      | 1,93     | 1,22        |
| ENSG000000115844 | DLX2        | 1,93     | 1,13        |
| ENSG000000174915 | PTDSS2      | 1,93     | 1,30        |
| ENSG000000188820 | FAM26F      | 1,93     | 1,79        |
| ENSG000000178385 | PLEKHM3     | 1,93     | 1,20        |
| ENSG000000076043 | REXO2       | 1,93     | 1,45        |
| ENSG000000198858 | R3HDM4      | 1,93     | 1,15        |
| ENSG000000223443 | USP17L2     | 1,93     | 1,13        |
| ENSG000000146872 | TLK2        | 1,93     | 1,20        |
| ENSG000000169955 | ZNF747      | 1,93     | 1,31        |
| ENSG000000143933 | CALM2       | 1,93     | 1,29        |
| ENSG000000187140 | FOXD3       | 1,93     | 1,12        |
| ENSG000000147168 | IL2RG       | 1,93     | 1,36        |
| ENSG000000107796 | ACTA2       | 1,92     | 1,28        |
| ENSG000000074803 | SLC12A1     | 1,92     | 1,19        |
| ENSG000000125816 | NKX2-4      | 1,92     | 1,14        |
| ENSG000000174521 | TTC9B       | 1,92     | 1,09        |
| ENSG000000198754 | OXCT2       | 1,92     | 1,75        |
| ENSG000000261649 | GOLGA6L7P   | 1,92     | 1,31        |
| ENSG000000162772 | ATF3        | 1,92     | 1,63        |
| ENSG000000005889 | ZFX         | 1,92     | 1,18        |
| ENSG000000166439 | RNF169      | 1,92     | 1,30        |
| ENSG000000136630 | HLX         | 1,92     | 1,32        |
| ENSG000000198601 | OR2M2       | 1,92     | 1,12        |
| ENSG000000164687 | FABP5       | 1,92     | 1,36        |
| ENSG000000108854 | SMURF2      | 1,92     | 1,23        |
| ENSG000000138107 | ACTR1A      | 1,92     | 1,23        |
| ENSG000000008517 | IL32        | 1,92     | 1,29        |
| ENSG000000115317 | HTRA2       | 1,92     | 1,26        |
| ENSG000000115956 | PLEK        | 1,92     | 1,75        |
| ENSG000000204118 | NAP1L6      | 1,92     | 1,12        |
| ENSG000000175416 | CLTB        | 1,92     | 1,21        |
| ENSG000000162761 | LMX1A       | 1,92     | 1,12        |
| ENSG000000136052 | SLC41A2     | 1,92     | 1,29        |
| ENSG000000179981 | TSHZ1       | 1,92     | 1,23        |
| ENSG000000155792 | DEPTOR      | 1,92     | 1,75        |
| ENSG000000232125 | DYTN        | 1,92     | 1,30        |
| ENSG000000183060 | LYSMD4      | 1,92     | 1,15        |
| ENSG000000134253 | TRIM45      | 1,92     | 1,19        |
| ENSG000000075234 | TTC38       | 1,92     | 1,27        |
| ENSG000000171495 | MROH2B      | 1,91     | 1,10        |

| ensembl gene    | gene symbol | Score(d) | Fold Change |
|-----------------|-------------|----------|-------------|
| ENSG00000171408 | PDE7B       | 1,91     | 1,12        |
| ENSG00000132386 | SERPINF1    | 1,91     | 1,25        |
| ENSG00000047249 | ATP6V1H     | 1,91     | 1,29        |
| ENSG00000127377 | CRYGN       | 1,91     | 1,10        |
| ENSG00000197555 | SIPA1L1     | 1,91     | 1,34        |
| ENSG00000196156 | KRTAP4-3    | 1,91     | 1,13        |
| ENSG00000101849 | TBL1X       | 1,91     | 1,23        |
| ENSG00000170873 | MTSS1       | 1,91     | 1,73        |
| ENSG00000133488 | SEC14L4     | 1,91     | 1,15        |
| ENSG00000139410 | SDSL        | 1,91     | 1,19        |
| ENSG00000143340 | FAM163A     | 1,91     | 1,10        |
| ENSG00000253368 | TRNP1       | 1,91     | 1,17        |
| ENSG00000148803 | FUOM        | 1,91     | 1,38        |
| ENSG00000183496 | MEX3B       | 1,91     | 1,16        |
| ENSG00000127884 | ECHS1       | 1,91     | 1,20        |
| ENSG00000280260 | AC017028.1  | 1,90     | 1,14        |
| ENSG00000094796 | KRT31       | 1,90     | 1,13        |
| ENSG00000196935 | SRGAP1      | 1,90     | 1,32        |
| ENSG00000188152 | NUTM2G      | 1,90     | 1,16        |
| ENSG00000117016 | RIMS3       | 1,90     | 1,12        |
| ENSG00000104499 | GML         | 1,90     | 1,16        |
| ENSG00000110628 | SLC22A18    | 1,90     | 1,22        |
| ENSG00000188243 | COMMD6      | 1,90     | 1,48        |
| ENSG00000100350 | FOXRED2     | 1,90     | 1,31        |
| ENSG00000100604 | CHGA        | 1,90     | 1,18        |
| ENSG00000197579 | TOPORS      | 1,90     | 1,18        |
| ENSG00000197971 | MBP         | 1,90     | 1,18        |
| ENSG00000165102 | HGSNAT      | 1,90     | 1,31        |
| ENSG00000130402 | ACTN4       | 1,90     | 1,24        |
| ENSG00000180628 | PCGF5       | 1,90     | 1,29        |
| ENSG00000036054 | TBC1D23     | 1,90     | 1,32        |
| ENSG00000203785 | SPRR2E      | 1,90     | 1,09        |
| ENSG00000228083 | IFNA14      | 1,90     | 1,16        |
| ENSG00000068724 | TTC7A       | 1,90     | 1,17        |
| ENSG00000109689 | STIM2       | 1,90     | 1,22        |
| ENSG00000175970 | UNC119B     | 1,90     | 1,21        |
| ENSG00000141580 | WDR45B      | 1,90     | 1,15        |
| ENSG00000116031 | CD207       | 1,90     | 1,11        |
| ENSG00000162706 | CADM3       | 1,89     | 1,16        |
| ENSG00000206172 | HBA1        | 1,89     | 1,22        |
| ENSG00000171126 | KCNG3       | 1,89     | 1,09        |
| ENSG00000187612 | OR5W2       | 1,89     | 1,11        |
| ENSG00000131669 | NINJ1       | 1,89     | 1,27        |
| ENSG00000175984 | DENND2C     | 1,89     | 1,40        |
| ENSG00000151729 | SLC25A4     | 1,89     | 1,34        |
| ENSG00000261236 | BOP1        | 1,89     | 1,20        |
| ENSG00000146426 | TIAM2       | 1,89     | 1,48        |
| ENSG00000142794 | NBPF3       | 1,89     | 1,23        |
| ENSG00000272573 | MUSTN1      | 1,89     | 1,31        |



| ensembl gene    | gene symbol | Score(d) | Fold Change |
|-----------------|-------------|----------|-------------|
| ENSG00000180730 | SHISA2      | 1,89     | 1,41        |
| ENSG00000077235 | GTF3C1      | 1,89     | 1,19        |
| ENSG00000079387 | SENP1       | 1,89     | 1,19        |
| ENSG00000108395 | TRIM37      | 1,89     | 1,19        |
| ENSG00000108946 | PRKAR1A     | 1,89     | 1,26        |
| ENSG00000163874 | ZC3H12A     | 1,89     | 1,40        |
| ENSG00000170085 | SIMC1       | 1,89     | 1,23        |
| ENSG00000102882 | MAPK3       | 1,89     | 1,18        |
| ENSG00000183621 | ZNF438      | 1,89     | 1,10        |
| ENSG00000120709 | FAM53C      | 1,89     | 1,20        |
| ENSG00000128487 | SPECC1      | 1,88     | 1,79        |
| ENSG00000157330 | C1orf158    | 1,88     | 1,13        |
| ENSG00000100614 | PPM1A       | 1,88     | 1,24        |
| ENSG00000100918 | REC8        | 1,88     | 1,28        |
| ENSG00000183207 | RUVBL2      | 1,88     | 1,28        |
| ENSG00000184990 | SIVA1       | 1,88     | 1,22        |
| ENSG00000241224 | FLJ22763    | 1,88     | 1,14        |
| ENSG00000104823 | ECH1        | 1,88     | 1,22        |
| ENSG00000029639 | TFB1M       | 1,88     | 1,31        |
| ENSG00000115524 | SF3B1       | 1,88     | 1,18        |
| ENSG00000155744 | FAM126B     | 1,88     | 1,25        |
| ENSG00000141076 | UTP4        | 1,88     | 1,27        |
| ENSG00000196628 | TCF4        | -7,90    | 0,13        |
| ENSG00000140382 | HMG20A      | -7,02    | 0,50        |
| ENSG00000137814 | HAUS2       | -6,53    | 0,46        |
| ENSG00000144645 | OSBPL10     | -6,38    | 0,11        |
| ENSG00000033170 | FUT8        | -6,29    | 0,17        |
| ENSG00000244734 | HBB         | -6,22    | 0,14        |
| ENSG00000255837 | TAS2R20     | -6,21    | 0,34        |
| ENSG00000197054 | ZNF763      | -6,12    | 0,44        |
| ENSG00000070610 | GBA2        | -6,09    | 0,56        |
| ENSG00000065457 | ADAT1       | -6,07    | 0,42        |
| ENSG00000104866 | PPP1R37     | -6,03    | 0,51        |
| ENSG00000110717 | NDUFS8      | -6,00    | 0,51        |
| ENSG00000241106 | HLA-DOB     | -6,00    | 0,27        |
| ENSG00000111906 | HDDC2       | -5,73    | 0,56        |
| ENSG00000164406 | LEAP2       | -5,62    | 0,60        |
| ENSG00000206530 | CFAP44      | -5,59    | 0,19        |
| ENSG00000114956 | DGUOK       | -5,54    | 0,65        |
| ENSG00000151746 | BICD1       | -5,48    | 0,53        |
| ENSG00000154144 | TBRG1       | -5,45    | 0,56        |
| ENSG00000106415 | GLCCI1      | -5,44    | 0,43        |
| ENSG00000168283 | BMI1        | -5,40    | 0,49        |
| ENSG00000212127 | TAS2R14     | -5,32    | 0,40        |
| ENSG00000154016 | GRAP        | -5,28    | 0,53        |
| ENSG00000198417 | MT1F        | -5,27    | 0,36        |
| ENSG00000169397 | RNASE3      | -5,25    | 0,14        |
| ENSG00000162739 | SLAMF6      | -5,25    | 0,15        |
| ENSG00000212126 | TAS2R50     | -5,24    | 0,42        |

| ensembl gene    | gene symbol | Score(d) | Fold Change |
|-----------------|-------------|----------|-------------|
| ENSG00000177045 | SIX5        | -5,23    | 0,65        |
| ENSG00000212124 | TAS2R19     | -5,21    | 0,37        |
| ENSG00000117009 | KMO         | -5,21    | 0,21        |
| ENSG00000139737 | SLAIN1      | -5,18    | 0,46        |
| ENSG00000064115 | TM7SF3      | -5,16    | 0,44        |
| ENSG00000102471 | NDFIP2      | -5,12    | 0,43        |
| ENSG00000139190 | VAMP1       | -5,10    | 0,43        |
| ENSG00000213024 | NUP62       | -5,09    | 0,47        |
| ENSG00000131067 | GGT7        | -5,07    | 0,63        |
| ENSG00000118363 | SPCS2       | -5,06    | 0,40        |
| ENSG00000105698 | USF2        | -5,05    | 0,69        |
| ENSG00000180953 | ST20        | -5,04    | 0,45        |
| ENSG00000049323 | LTBP1       | -5,03    | 0,37        |
| ENSG00000104880 | ARHGEF18    | -5,03    | 0,37        |
| ENSG00000135185 | TMEM243     | -4,98    | 0,57        |
| ENSG00000113068 | PFDN1       | -4,96    | 0,52        |
| ENSG00000223501 | VPS52       | -4,95    | 0,66        |
| ENSG00000149547 | EI24        | -4,94    | 0,54        |
| ENSG00000177830 | CHID1       | -4,92    | 0,62        |
| ENSG00000116005 | PCYOX1      | -4,90    | 0,55        |
| ENSG00000167523 | SPATA33     | -4,88    | 0,51        |
| ENSG00000149516 | MS4A3       | -4,88    | 0,26        |
| ENSG00000113638 | TTC33       | -4,88    | 0,53        |
| ENSG00000205707 | LYRM5       | -4,87    | 0,59        |
| ENSG00000105205 | CLC         | -4,87    | 0,23        |
| ENSG00000169696 | ASPSCR1     | -4,86    | 0,71        |
| ENSG00000136694 | IL36A       | -4,85    | 0,57        |
| ENSG00000158604 | TMED4       | -4,85    | 0,63        |
| ENSG00000169877 | AHSP        | -4,85    | 0,31        |
| ENSG00000091972 | CD200       | -4,83    | 0,24        |
| ENSG00000163221 | S100A12     | -4,82    | 0,21        |
| ENSG00000104967 | NOVA2       | -4,82    | 0,62        |
| ENSG00000151612 | ZNF827      | -4,81    | 0,48        |
| ENSG00000099797 | TECR        | -4,81    | 0,66        |
| ENSG00000198429 | ZNF69       | -4,80    | 0,53        |
| ENSG00000143297 | FCRL5       | -4,80    | 0,35        |
| ENSG00000219545 | UMAD1       | -4,79    | 0,59        |
| ENSG00000005381 | MPO         | -4,79    | 0,19        |
| ENSG00000105656 | ELL         | -4,79    | 0,54        |
| ENSG00000140400 | MAN2C1      | -4,76    | 0,57        |
| ENSG00000135862 | LAMC1       | -4,75    | 0,39        |
| ENSG00000213593 | TMX2        | -4,73    | 0,61        |
| ENSG00000178104 | PDE4DIP     | -4,73    | 0,48        |
| ENSG00000163527 | STT3B       | -4,72    | 0,66        |
| ENSG00000163736 | PPBP        | -4,71    | 0,22        |
| ENSG00000004534 | RBM6        | -4,70    | 0,62        |
| ENSG00000005961 | ITGA2B      | -4,68    | 0,28        |
| ENSG00000172915 | NBEA        | -4,68    | 0,39        |
| ENSG00000170296 | GABARAP     | -4,67    | 0,73        |

| ensembl gene    | gene symbol | Score(d) | Fold Change |
|-----------------|-------------|----------|-------------|
| ENSG00000148358 | GPR107      | -4,67    | 0,71        |
| ENSG00000177463 | NR2C2       | -4,66    | 0,66        |
| ENSG00000118113 | MMP8        | -4,66    | 0,19        |
| ENSG00000172366 | MCRIP2      | -4,66    | 0,52        |
| ENSG00000196476 | C20orf96    | -4,64    | 0,56        |
| ENSG00000128563 | PRKRIP1     | -4,64    | 0,73        |
| ENSG00000213999 | MEF2B       | -4,63    | 0,72        |
| ENSG00000074201 | CLNS1A      | -4,62    | 0,54        |
| ENSG00000182054 | IDH2        | -4,61    | 0,53        |
| ENSG00000175727 | MLXIP       | -4,61    | 0,63        |
| ENSG00000130748 | TMEM160     | -4,61    | 0,55        |
| ENSG00000118689 | FOXO3       | -4,60    | 0,44        |
| ENSG00000160991 | ORAI2       | -4,59    | 0,65        |
| ENSG00000153339 | TRAPPC8     | -4,59    | 0,52        |
| ENSG00000086200 | IPO11       | -4,58    | 0,52        |
| ENSG00000111676 | ATN1        | -4,58    | 0,67        |
| ENSG00000137509 | PRCP        | -4,57    | 0,59        |
| ENSG00000154146 | NRGN        | -4,57    | 0,64        |
| ENSG00000185565 | LSAMP       | -4,56    | 0,22        |
| ENSG00000121318 | TAS2R10     | -4,56    | 0,41        |
| ENSG00000213347 | MXD3        | -4,53    | 0,63        |
| ENSG00000157014 | TATDN2      | -4,52    | 0,56        |
| ENSG00000123352 | SPATS2      | -4,49    | 0,63        |
| ENSG00000133740 | E2F5        | -4,49    | 0,52        |
| ENSG00000214078 | CPNE1       | -4,48    | 0,55        |
| ENSG00000241399 | CD302       | -4,47    | 0,49        |
| ENSG00000143222 | UFC1        | -4,45    | 0,69        |
| ENSG00000096006 | CRISP3      | -4,45    | 0,33        |
| ENSG00000095303 | PTGS1       | -4,45    | 0,57        |
| ENSG00000143479 | DYRK3       | -4,43    | 0,52        |
| ENSG00000148057 | IDNK        | -4,43    | 0,59        |
| ENSG00000237441 | RGL2        | -4,40    | 0,59        |
| ENSG00000177076 | ACER2       | -4,40    | 0,55        |
| ENSG00000153936 | HS2ST1      | -4,40    | 0,59        |
| ENSG00000149292 | TTC12       | -4,39    | 0,61        |
| ENSG00000073605 | GSDMB       | -4,39    | 0,57        |
| ENSG00000172716 | SLFN11      | -4,38    | 0,36        |
| ENSG00000120833 | SOCS2       | -4,38    | 0,65        |
| ENSG00000005020 | SKAP2       | -4,37    | 0,45        |
| ENSG00000185305 | ARL15       | -4,36    | 0,57        |
| ENSG00000129245 | FXR2        | -4,36    | 0,53        |
| ENSG00000107341 | UBE2R2      | -4,36    | 0,70        |
| ENSG00000180357 | ZNF609      | -4,35    | 0,68        |
| ENSG00000071655 | MBD3        | -4,35    | 0,62        |
| ENSG00000123095 | BHLHE41     | -4,34    | 0,40        |
| ENSG00000110713 | NUP98       | -4,34    | 0,67        |
| ENSG00000152818 | UTRN        | -4,34    | 0,49        |
| ENSG00000134369 | NAV1        | -4,34    | 0,55        |
| ENSG00000140396 | NCOA2       | -4,34    | 0,64        |

| ensembl gene    | gene symbol | Score(d) | Fold Change |
|-----------------|-------------|----------|-------------|
| ENSG00000154229 | PRKCA       | -4,33    | 0,30        |
| ENSG00000106603 | COA1        | -4,33    | 0,65        |
| ENSG00000215883 | CYB5RL      | -4,32    | 0,75        |
| ENSG00000188916 | FAM196A     | -4,30    | 0,83        |
| ENSG00000179833 | SERTAD2     | -4,30    | 0,53        |
| ENSG00000064225 | ST3GAL6     | -4,30    | 0,57        |
| ENSG00000274641 | HIST1H2BO   | -4,29    | 0,44        |
| ENSG00000183401 | CCDC159     | -4,29    | 0,57        |
| ENSG00000172375 | C2CD2L      | -4,29    | 0,65        |
| ENSG00000111328 | CDK2AP1     | -4,28    | 0,55        |
| ENSG00000139352 | ASCL1       | -4,28    | 0,72        |
| ENSG00000259207 | ITGB3       | -4,27    | 0,31        |
| ENSG00000136267 | DGKB        | -4,27    | 0,71        |
| ENSG00000167644 | C19orf33    | -4,27    | 0,65        |
| ENSG00000198900 | TOP1        | -4,25    | 0,68        |
| ENSG00000168781 | PPIP5K1     | -4,25    | 0,55        |
| ENSG00000198879 | SFMBT2      | -4,24    | 0,54        |
| ENSG00000186815 | TPCN1       | -4,24    | 0,51        |
| ENSG00000197959 | DNM3        | -4,24    | 0,58        |
| ENSG00000129911 | KLF16       | -4,24    | 0,67        |
| ENSG00000237172 | B3GNT9      | -4,24    | 0,56        |
| ENSG00000123096 | SSPN        | -4,23    | 0,50        |
| ENSG00000182158 | CREB3L2     | -4,23    | 0,64        |
| ENSG00000119514 | GALNT12     | -4,23    | 0,51        |
| ENSG00000241127 | YAE1D1      | -4,23    | 0,47        |
| ENSG00000118420 | UBE3D       | -4,23    | 0,56        |
| ENSG00000141458 | NPC1        | -4,22    | 0,56        |
| ENSG00000197713 | RPE         | -4,22    | 0,56        |
| ENSG00000139193 | CD27        | -4,21    | 0,19        |
| ENSG00000120805 | ARL1        | -4,21    | 0,59        |
| ENSG00000213934 | HBG1        | -4,21    | 0,71        |
| ENSG00000154258 | ABCA9       | -4,21    | 0,53        |
| ENSG00000103043 | VAC14       | -4,20    | 0,62        |
| ENSG00000125107 | CNOT1       | -4,20    | 0,62        |
| ENSG00000123384 | LRP1        | -4,19    | 0,36        |
| ENSG00000075651 | PLD1        | -4,19    | 0,54        |
| ENSG00000073756 | PTGS2       | -4,19    | 0,32        |
| ENSG00000158042 | MRPL17      | -4,18    | 0,57        |
| ENSG00000103018 | CYB5B       | -4,17    | 0,53        |
| ENSG00000132535 | DLG4        | -4,16    | 0,46        |
| ENSG00000034713 | GABARAPL2   | -4,16    | 0,59        |
| ENSG00000102053 | ZC3H12B     | -4,16    | 0,54        |
| ENSG00000197536 | C5orf56     | -4,16    | 0,64        |
| ENSG00000081791 | KIAA0141    | -4,15    | 0,64        |
| ENSG00000112893 | MAN2A1      | -4,15    | 0,58        |
| ENSG00000185155 | MIXL1       | -4,15    | 0,39        |
| ENSG00000136144 | RCBTB1      | -4,15    | 0,58        |
| ENSG00000103365 | GGA2        | -4,14    | 0,67        |
| ENSG00000057935 | MTA3        | -4,14    | 0,56        |

| ensembl gene    | gene symbol | Score(d) | Fold Change |
|-----------------|-------------|----------|-------------|
| ENSG00000196562 | SULF2       | -4,14    | 0,22        |
| ENSG00000167113 | COQ4        | -4,14    | 0,69        |
| ENSG00000103064 | SLC7A6      | -4,13    | 0,58        |
| ENSG00000169926 | KLF13       | -4,13    | 0,63        |
| ENSG00000242220 | TCP10L      | -4,13    | 0,66        |
| ENSG00000226761 | TAS2R46     | -4,13    | 0,45        |
| ENSG00000130347 | RTN4IP1     | -4,12    | 0,61        |
| ENSG00000169330 | KIAA1024    | -4,12    | 0,56        |
| ENSG00000188732 | FAM221A     | -4,12    | 0,48        |
| ENSG00000183688 | FAM101B     | -4,12    | 0,41        |
| ENSG00000175634 | RPS6KB2     | -4,11    | 0,68        |
| ENSG00000102221 | JADE3       | -4,11    | 0,67        |
| ENSG00000159199 | ATP5G1      | -4,11    | 0,50        |
| ENSG00000178115 | GOLGA8Q     | -4,10    | 0,48        |
| ENSG00000076108 | BAZ2A       | -4,10    | 0,63        |
| ENSG00000184831 | APOO        | -4,10    | 0,48        |
| ENSG00000198837 | DENND4B     | -4,10    | 0,64        |
| ENSG00000171310 | CHST11      | -4,10    | 0,53        |
| ENSG00000168491 | CCDC110     | -4,09    | 0,41        |
| ENSG00000107984 | DKK1        | -4,09    | 0,19        |
| ENSG00000063854 | HAGH        | -4,09    | 0,54        |
| ENSG00000161911 | TREML1      | -4,09    | 0,48        |
| ENSG00000174851 | YIF1A       | -4,08    | 0,60        |
| ENSG00000197385 | ZNF860      | -4,08    | 0,50        |
| ENSG00000188215 | DCUN1D3     | -4,07    | 0,60        |
| ENSG00000134504 | KCTD1       | -4,07    | 0,35        |
| ENSG00000172775 | FAM192A     | -4,07    | 0,69        |
| ENSG00000145088 | EAF2        | -4,07    | 0,52        |
| ENSG00000163171 | CDC42EP3    | -4,06    | 0,53        |
| ENSG00000156928 | MALSU1      | -4,06    | 0,62        |
| ENSG00000106344 | RBM28       | -4,06    | 0,61        |
| ENSG00000169398 | PTK2        | -4,05    | 0,40        |
| ENSG00000196220 | SRGAP3      | -4,05    | 0,63        |
| ENSG00000133048 | CHI3L1      | -4,05    | 0,52        |
| ENSG00000171481 | OR1L3       | -4,04    | 0,48        |
| ENSG00000136205 | TNS3        | -4,04    | 0,41        |
| ENSG00000205209 | SCGB2B2     | -4,04    | 0,66        |
| ENSG00000139174 | PRICKLE1    | -4,04    | 0,57        |
| ENSG00000115828 | QPCT        | -4,04    | 0,17        |
| ENSG00000198270 | TMEM116     | -4,03    | 0,66        |
| ENSG00000156575 | PRG3        | -4,03    | 0,65        |
| ENSG00000155506 | LARP1       | -4,03    | 0,76        |
| ENSG00000163626 | COX18       | -4,02    | 0,65        |
| ENSG00000130749 | ZC3H4       | -4,02    | 0,63        |
| ENSG00000175106 | TVP23C      | -4,02    | 0,54        |
| ENSG00000185219 | ZNF445      | -4,01    | 0,65        |
| ENSG00000168243 | GNG4        | -4,01    | 0,75        |
| ENSG00000159063 | ALG8        | -4,01    | 0,68        |
| ENSG00000164180 | TMEM161B    | -4,01    | 0,64        |

| ensembl gene    | gene symbol      | Score(d) | Fold Change |
|-----------------|------------------|----------|-------------|
| ENSG00000079215 | SLC1A3           | -3,99    | 0,73        |
| ENSG00000137726 | FXVD6            | -3,99    | 0,70        |
| ENSG00000169385 | RNASE2           | -3,99    | 0,27        |
| ENSG00000279342 | AP000866.1       | -3,98    | 0,54        |
| ENSG00000137338 | PGBD1            | -3,98    | 0,70        |
| ENSG00000142538 | PTH2             | -3,98    | 0,79        |
| ENSG00000146021 | KLHL3            | -3,98    | 0,55        |
| ENSG00000124256 | ZBP1             | -3,98    | 0,54        |
| ENSG00000067141 | NEO1             | -3,98    | 0,48        |
| ENSG00000119801 | YPEL5            | -3,97    | 0,73        |
| ENSG00000119777 | TMEM214          | -3,96    | 0,74        |
| ENSG00000136193 | SCRN1            | -3,96    | 0,47        |
| ENSG00000166341 | DCHS1            | -3,96    | 0,78        |
| ENSG00000101290 | CDS2             | -3,96    | 0,61        |
| ENSG00000125703 | ATG4C            | -3,95    | 0,50        |
| ENSG00000145335 | SNCA             | -3,95    | 0,46        |
| ENSG00000099326 | MZF1             | -3,95    | 0,65        |
| ENSG00000070614 | NDST1            | -3,94    | 0,77        |
| ENSG00000244405 | ETV5             | -3,94    | 0,43        |
| ENSG00000104774 | MAN2B1           | -3,94    | 0,57        |
| ENSG00000139197 | PEX5             | -3,94    | 0,64        |
| ENSG00000105223 | PLD3             | -3,94    | 0,62        |
| ENSG00000130382 | MLLT1            | -3,93    | 0,65        |
| ENSG00000120727 | PAIP2            | -3,93    | 0,71        |
| ENSG00000079150 | FKBP7            | -3,93    | 0,50        |
| ENSG00000167548 | KMT2D            | -3,93    | 0,64        |
| ENSG00000112977 | DAP              | -3,92    | 0,64        |
| ENSG00000011478 | QPCTL            | -3,92    | 0,64        |
| ENSG00000177570 | SAMD12           | -3,92    | 0,48        |
| ENSG00000174282 | ZBTB4            | -3,91    | 0,73        |
| ENSG00000162777 | DENND2D          | -3,91    | 0,67        |
| ENSG00000126883 | NUP214           | -3,91    | 0,81        |
| ENSG00000157429 | ZNF19            | -3,90    | 0,73        |
| ENSG00000196415 | PRTN3            | -3,89    | 0,55        |
| ENSG00000185245 | GP1BA            | -3,88    | 0,72        |
| ENSG00000137494 | ANKRD42          | -3,88    | 0,62        |
| ENSG00000187266 | EPOR             | -3,88    | 0,74        |
| ENSG00000283199 | BC13-47488600E17 | -3,88    | 0,59        |
| ENSG00000122592 | HOXA7            | -3,88    | 0,76        |
| ENSG00000198146 | ZNF770           | -3,87    | 0,65        |
| ENSG00000086506 | HBQ1             | -3,87    | 0,77        |
| ENSG00000176182 | MYPOP            | -3,87    | 0,74        |
| ENSG00000127526 | SLC35E1          | -3,86    | 0,68        |
| ENSG00000269028 | MTRNR2L12        | -3,86    | 0,48        |
| ENSG00000111554 | MDM1             | -3,85    | 0,61        |
| ENSG00000125571 | IL37             | -3,85    | 0,75        |
| ENSG00000181722 | ZBTB20           | -3,85    | 0,61        |
| ENSG00000137845 | ADAM10           | -3,84    | 0,60        |
| ENSG00000225830 | ERCC6            | -3,84    | 0,61        |

| ensembl gene    | gene symbol | Score(d) | Fold Change |
|-----------------|-------------|----------|-------------|
| ENSG00000179151 | EDC3        | -3,83    | 0,58        |
| ENSG00000186283 | TOR3A       | -3,82    | 0,64        |
| ENSG00000137198 | GMPR        | -3,82    | 0,44        |
| ENSG00000127578 | WFIKK1      | -3,82    | 0,84        |
| ENSG00000154237 | LRRK1       | -3,81    | 0,48        |
| ENSG00000165795 | NDRG2       | -3,81    | 0,30        |
| ENSG00000077044 | DGKD        | -3,81    | 0,52        |
| ENSG00000104957 | CCDC130     | -3,80    | 0,74        |
| ENSG00000105173 | CCNE1       | -3,80    | 0,52        |
| ENSG00000197561 | ELANE       | -3,80    | 0,54        |
| ENSG00000173200 | PARP15      | -3,79    | 0,23        |
| ENSG00000130723 | PRRC2B      | -3,79    | 0,74        |
| ENSG00000165490 | DDIAS       | -3,79    | 0,48        |
| ENSG00000184719 | RNLS        | -3,79    | 0,62        |
| ENSG00000187372 | PCDHB13     | -3,79    | 0,42        |
| ENSG00000149636 | DSN1        | -3,79    | 0,68        |
| ENSG00000166435 | XRRA1       | -3,78    | 0,53        |
| ENSG00000180448 | ARHGAP45    | -3,78    | 0,62        |
| ENSG00000240764 | PCDHGC5     | -3,77    | 0,56        |
| ENSG00000164889 | SLC4A2      | -3,77    | 0,68        |
| ENSG00000101441 | CST4        | -3,76    | 0,68        |
| ENSG00000141759 | TXNL4A      | -3,76    | 0,71        |
| ENSG00000166145 | SPINT1      | -3,76    | 0,49        |
| ENSG00000178252 | WDR6        | -3,76    | 0,63        |
| ENSG00000011451 | WIZ         | -3,75    | 0,76        |
| ENSG00000178904 | DPY19L3     | -3,75    | 0,66        |
| ENSG00000182087 | TMEM259     | -3,74    | 0,70        |
| ENSG00000151117 | TMEM86A     | -3,73    | 0,68        |
| ENSG00000165215 | CLDN3       | -3,73    | 0,65        |
| ENSG00000125637 | PSD4        | -3,72    | 0,72        |
| ENSG00000166368 | OR2D2       | -3,72    | 0,47        |
| ENSG00000249709 | ZNF564      | -3,72    | 0,59        |
| ENSG00000109743 | BST1        | -3,72    | 0,62        |
| ENSG00000154645 | CHODL       | -3,72    | 0,56        |
| ENSG00000120915 | EPHX2       | -3,72    | 0,51        |
| ENSG00000170323 | FABP4       | -3,72    | 0,47        |
| ENSG00000177666 | PNPLA2      | -3,71    | 0,69        |
| ENSG00000212128 | TAS2R13     | -3,71    | 0,55        |
| ENSG00000170549 | IRX1        | -3,71    | 0,81        |
| ENSG00000174132 | FAM174A     | -3,70    | 0,64        |
| ENSG00000170271 | FAXDC2      | -3,70    | 0,58        |
| ENSG00000160999 | SH2B2       | -3,70    | 0,53        |
| ENSG00000172765 | TMCC1       | -3,70    | 0,75        |
| ENSG00000177238 | TRIM72      | -3,69    | 0,79        |
| ENSG00000164587 | RPS14       | -3,69    | 0,69        |
| ENSG00000163645 | ERICH6      | -3,69    | 0,80        |
| ENSG00000183323 | CCDC125     | -3,69    | 0,55        |
| ENSG00000137504 | CREBZF      | -3,69    | 0,75        |
| ENSG00000132640 | BTBD3       | -3,69    | 0,24        |

| ensembl gene    | gene symbol  | Score(d) | Fold Change |
|-----------------|--------------|----------|-------------|
| ENSG00000275023 | MLLT6        | -3,68    | 0,70        |
| ENSG00000184363 | PKP3         | -3,68    | 0,77        |
| ENSG00000137634 | NXPE4        | -3,68    | 0,22        |
| ENSG00000107077 | KDM4C        | -3,68    | 0,67        |
| ENSG00000164142 | FAM160A1     | -3,68    | 0,33        |
| ENSG00000157680 | DGKI         | -3,67    | 0,49        |
| ENSG00000107290 | SETX         | -3,67    | 0,65        |
| ENSG00000126464 | PRR12        | -3,67    | 0,75        |
| ENSG00000169814 | BTD          | -3,66    | 0,71        |
| ENSG00000138617 | PARP16       | -3,66    | 0,63        |
| ENSG00000125995 | ROMO1        | -3,66    | 0,69        |
| ENSG00000100320 | RBFOX2       | -3,65    | 0,57        |
| ENSG00000242616 | GNG10        | -3,65    | 0,61        |
| ENSG00000149131 | SERPING1     | -3,65    | 0,38        |
| ENSG00000165140 | FBP1         | -3,65    | 0,34        |
| ENSG00000101162 | TUBB1        | -3,65    | 0,51        |
| ENSG00000135439 | AGAP2        | -3,64    | 0,65        |
| ENSG00000240771 | ARHGEF25     | -3,64    | 0,63        |
| ENSG00000073849 | ST6GAL1      | -3,64    | 0,63        |
| ENSG00000103037 | SETD6        | -3,64    | 0,72        |
| ENSG00000072134 | EPN2         | -3,64    | 0,63        |
| ENSG00000104361 | NIPAL2       | -3,64    | 0,52        |
| ENSG00000117090 | SLAMF1       | -3,64    | 0,21        |
| ENSG00000134121 | CHL1         | -3,64    | 0,71        |
| ENSG00000104341 | LAPTM4B      | -3,64    | 0,26        |
| ENSG00000145708 | CRHBP        | -3,64    | 0,46        |
| ENSG00000176788 | BASP1        | -3,63    | 0,28        |
| ENSG00000142494 | SLC47A1      | -3,63    | 0,18        |
| ENSG00000105738 | SIPA1L3      | -3,63    | 0,64        |
| ENSG00000198105 | ZNF248       | -3,63    | 0,64        |
| ENSG00000012061 | ERCC1        | -3,62    | 0,69        |
| ENSG00000250803 | CTC-441N14.4 | -3,62    | 0,68        |
| ENSG00000257335 | MGAM         | -3,62    | 0,49        |
| ENSG00000171044 | XKR6         | -3,61    | 0,51        |
| ENSG00000186765 | FSCN2        | -3,61    | 0,82        |
| ENSG00000070366 | SMG6         | -3,60    | 0,70        |
| ENSG00000006015 | C19orf60     | -3,60    | 0,72        |
| ENSG00000049860 | HEXB         | -3,60    | 0,67        |
| ENSG00000197233 | OR1J2        | -3,60    | 0,58        |
| ENSG00000121053 | EPX          | -3,59    | 0,43        |
| ENSG00000165702 | GFI1B        | -3,59    | 0,79        |
| ENSG00000197594 | ENPP1        | -3,58    | 0,38        |
| ENSG00000262209 | PCDHGB3      | -3,58    | 0,53        |
| ENSG00000184330 | S100A7A      | -3,58    | 0,70        |
| ENSG00000186487 | MYT1L        | -3,58    | 0,72        |
| ENSG00000088053 | GP6          | -3,58    | 0,81        |
| ENSG00000120327 | PCDHB14      | -3,58    | 0,37        |
| ENSG00000104881 | PPP1R13L     | -3,57    | 0,75        |
| ENSG00000136868 | SLC31A1      | -3,57    | 0,66        |



| ensembl gene    | gene symbol | Score(d) | Fold Change |
|-----------------|-------------|----------|-------------|
| ENSG00000113595 | TRIM23      | -3,57    | 0,72        |
| ENSG00000074370 | ATP2A3      | -3,57    | 0,55        |
| ENSG00000168300 | PCMTD1      | -3,57    | 0,69        |
| ENSG00000197530 | MIB2        | -3,57    | 0,77        |
| ENSG00000154760 | SLFN13      | -3,57    | 0,57        |
| ENSG00000107779 | BMPR1A      | -3,57    | 0,32        |
| ENSG00000072736 | NFATC3      | -3,57    | 0,64        |
| ENSG00000111424 | VDR         | -3,56    | 0,57        |
| ENSG00000215455 | KRTAP10-1   | -3,56    | 0,71        |
| ENSG00000102897 | LYRM1       | -3,56    | 0,69        |
| ENSG00000181751 | C5orf30     | -3,55    | 0,63        |
| ENSG00000145779 | TNFAIP8     | -3,55    | 0,54        |
| ENSG00000119042 | SATB2       | -3,55    | 0,60        |
| ENSG00000186081 | KRT5        | -3,55    | 0,65        |
| ENSG00000163554 | SPTA1       | -3,55    | 0,69        |
| ENSG00000171840 | NINJ2       | -3,55    | 0,70        |
| ENSG00000076662 | ICAM3       | -3,55    | 0,60        |
| ENSG00000171720 | HDAC3       | -3,54    | 0,71        |
| ENSG00000253485 | PCDHGA5     | -3,54    | 0,61        |
| ENSG00000102760 | RGCC        | -3,54    | 0,25        |
| ENSG00000121741 | ZMYM2       | -3,54    | 0,66        |
| ENSG00000197774 | EME2        | -3,54    | 0,82        |
| ENSG00000226763 | SRRM5       | -3,54    | 0,75        |
| ENSG00000159388 | BTG2        | -3,54    | 0,66        |
| ENSG00000114529 | C3orf52     | -3,54    | 0,59        |
| ENSG00000275385 | CCL18       | -3,54    | 0,78        |
| ENSG00000163083 | INHBB       | -3,54    | 0,84        |
| ENSG00000179222 | MAGED1      | -3,53    | 0,66        |
| ENSG00000183091 | NEB         | -3,53    | 0,27        |
| ENSG00000135503 | ACVR1B      | -3,53    | 0,64        |
| ENSG00000113456 | RAD1        | -3,53    | 0,76        |
| ENSG00000111325 | OGFOD2      | -3,52    | 0,69        |
| ENSG00000177807 | KCNJ10      | -3,52    | 0,71        |
| ENSG00000144959 | NCEH1       | -3,51    | 0,69        |
| ENSG00000177354 | C10orf71    | -3,51    | 0,76        |
| ENSG00000183778 | B3GALT5     | -3,51    | 0,70        |
| ENSG00000131094 | C1QL1       | -3,51    | 0,69        |
| ENSG00000142798 | HSPG2       | -3,50    | 0,70        |
| ENSG00000197776 | KLHDC1      | -3,50    | 0,55        |
| ENSG00000183258 | DDX41       | -3,50    | 0,71        |
| ENSG00000160209 | PDXK        | -3,50    | 0,69        |
| ENSG00000152926 | ZNF117      | -3,50    | 0,51        |
| ENSG00000169223 | LMAN2       | -3,50    | 0,74        |
| ENSG00000157350 | ST3GAL2     | -3,50    | 0,61        |
| ENSG00000170482 | SLC23A1     | -3,50    | 0,68        |
| ENSG00000174175 | SELP        | -3,50    | 0,54        |
| ENSG00000107185 | RGP1        | -3,50    | 0,76        |
| ENSG00000105662 | CRTC1       | -3,49    | 0,73        |
| ENSG00000128000 | ZNF780B     | -3,49    | 0,49        |

| ensembl gene    | gene symbol | Score(d) | Fold Change |
|-----------------|-------------|----------|-------------|
| ENSG00000180979 | LRRC57      | -3,49    | 0,70        |
| ENSG00000166603 | MC4R        | -3,49    | 0,25        |
| ENSG00000130702 | LAMA5       | -3,48    | 0,53        |
| ENSG00000185697 | MYBL1       | -3,48    | 0,23        |
| ENSG00000250722 | SEPP1       | -3,48    | 0,50        |
| ENSG00000142507 | PSMB6       | -3,48    | 0,64        |
| ENSG00000069966 | GNB5        | -3,48    | 0,63        |
| ENSG00000021461 | CYP3A43     | -3,48    | 0,42        |
| ENSG00000172380 | GNG12       | -3,48    | 0,57        |
| ENSG00000178057 | NDUFAF3     | -3,48    | 0,68        |
| ENSG00000178927 | C17orf62    | -3,48    | 0,68        |
| ENSG00000178741 | COX5A       | -3,48    | 0,68        |
| ENSG00000113761 | ZNF346      | -3,48    | 0,74        |
| ENSG00000185345 | PARK2       | -3,47    | 0,65        |
| ENSG00000100307 | CBX7        | -3,47    | 0,57        |
| ENSG00000028528 | SNX1        | -3,47    | 0,74        |
| ENSG00000028277 | POU2F2      | -3,47    | 0,57        |
| ENSG00000079691 | LRRC16A     | -3,47    | 0,58        |
| ENSG00000109208 | SMR3A       | -3,47    | 0,74        |
| ENSG00000198794 | SCAMP5      | -3,47    | 0,49        |
| ENSG00000039319 | ZFYVE16     | -3,46    | 0,63        |
| ENSG00000147535 | PLPP5       | -3,46    | 0,71        |
| ENSG00000225698 | IGHV3-72    | -3,46    | 0,40        |
| ENSG00000156858 | PRR14       | -3,46    | 0,70        |
| ENSG00000157379 | DHRS1       | -3,46    | 0,70        |
| ENSG00000204560 | DHX16       | -3,45    | 0,77        |
| ENSG00000116539 | ASH1L       | -3,45    | 0,62        |
| ENSG00000061273 | HDAC7       | -3,45    | 0,75        |
| ENSG00000185267 | CDNF        | -3,45    | 0,60        |
| ENSG00000140262 | TCF12       | -3,45    | 0,77        |
| ENSG00000240184 | PCDHGC3     | -3,44    | 0,52        |
| ENSG00000172922 | RNASEH2C    | -3,44    | 0,69        |
| ENSG00000198586 | TLK1        | -3,44    | 0,73        |
| ENSG00000184933 | OR6A2       | -3,43    | 0,59        |
| ENSG00000101439 | CST3        | -3,43    | 0,41        |
| ENSG00000040933 | INPP4A      | -3,42    | 0,64        |
| ENSG00000146963 | LUC7L2      | -3,42    | 0,75        |
| ENSG00000081189 | MEF2C       | -3,42    | 0,69        |
| ENSG00000143786 | CNIH3       | -3,42    | 0,67        |
| ENSG00000088812 | ATRNL       | -3,42    | 0,66        |
| ENSG00000108312 | UBTF        | -3,42    | 0,72        |
| ENSG00000104824 | HNRNPPL     | -3,41    | 0,75        |
| ENSG00000040633 | PHF23       | -3,41    | 0,70        |
| ENSG00000137101 | CD72        | -3,41    | 0,69        |
| ENSG00000148842 | CNNM2       | -3,41    | 0,64        |
| ENSG00000100321 | SYNGR1      | -3,41    | 0,54        |
| ENSG00000112812 | PRSS16      | -3,41    | 0,64        |
| ENSG00000105323 | HNRNPUL1    | -3,41    | 0,78        |
| ENSG00000103056 | SMPD3       | -3,41    | 0,64        |

| ensembl gene    | gene symbol | Score(d) | Fold Change |
|-----------------|-------------|----------|-------------|
| ENSG00000204482 | LST1        | -3,40    | 0,66        |
| ENSG00000172819 | RARG        | -3,40    | 0,70        |
| ENSG00000179397 | C1orf101    | -3,40    | 0,67        |
| ENSG00000166233 | ARIH1       | -3,40    | 0,72        |
| ENSG00000137513 | NARS2       | -3,40    | 0,67        |
| ENSG00000164181 | ELOVL7      | -3,39    | 0,41        |
| ENSG00000188033 | ZNF490      | -3,39    | 0,77        |
| ENSG00000126261 | UBA2        | -3,39    | 0,74        |
| ENSG00000253731 | PCDHGA6     | -3,39    | 0,55        |
| ENSG00000114738 | MAPKAPK3    | -3,38    | 0,71        |
| ENSG00000243789 | JMJD7       | -3,38    | 0,59        |
| ENSG00000105723 | GSK3A       | -3,38    | 0,79        |
| ENSG00000196227 | FAM217B     | -3,38    | 0,63        |
| ENSG00000176261 | ZBTB8OS     | -3,37    | 0,66        |
| ENSG00000133275 | CSNK1G2     | -3,37    | 0,66        |
| ENSG00000091879 | ANGPT2      | -3,37    | 0,83        |
| ENSG00000114544 | SLC41A3     | -3,37    | 0,73        |
| ENSG00000166405 | RIC3        | -3,36    | 0,44        |
| ENSG00000124767 | GLO1        | -3,36    | 0,74        |
| ENSG00000021776 | AQR         | -3,36    | 0,77        |
| ENSG00000188124 | OR2AG2      | -3,36    | 0,63        |
| ENSG00000168958 | MFF         | -3,36    | 0,75        |
| ENSG00000256222 | MTRNR2L3    | -3,36    | 0,77        |
| ENSG00000168675 | LDLRAD4     | -3,36    | 0,67        |
| ENSG00000174684 | B4GAT1      | -3,36    | 0,79        |
| ENSG00000224470 | ATXN1L      | -3,36    | 0,78        |
| ENSG00000106823 | ECM2        | -3,35    | 0,77        |
| ENSG00000154485 | MMP21       | -3,35    | 0,83        |
| ENSG00000165685 | TMEM52B     | -3,35    | 0,37        |
| ENSG00000172379 | ARNT2       | -3,35    | 0,47        |
| ENSG00000147799 | ARHGAP39    | -3,35    | 0,71        |
| ENSG00000156642 | NPTN        | -3,35    | 0,67        |
| ENSG00000153071 | DAB2        | -3,35    | 0,39        |
| ENSG00000127445 | PIN1        | -3,35    | 0,79        |
| ENSG00000126351 | THRA        | -3,34    | 0,69        |
| ENSG00000132612 | VPS4A       | -3,34    | 0,69        |
| ENSG00000124733 | MEA1        | -3,34    | 0,69        |
| ENSG00000187742 | SECISBP2    | -3,34    | 0,77        |
| ENSG00000170456 | DENND5B     | -3,34    | 0,69        |
| ENSG00000136929 | HEMGN       | -3,33    | 0,62        |
| ENSG00000117335 | CD46        | -3,33    | 0,67        |
| ENSG00000206535 | LNP1        | -3,33    | 0,61        |
| ENSG00000066382 | MPPED2      | -3,33    | 0,32        |
| ENSG00000189056 | RELN        | -3,33    | 0,31        |
| ENSG00000048828 | FAM120A     | -3,33    | 0,65        |
| ENSG00000130312 | MRPL34      | -3,33    | 0,58        |
| ENSG00000198728 | LDB1        | -3,33    | 0,74        |
| ENSG00000137642 | SORL1       | -3,32    | 0,51        |
| ENSG00000120451 | SNX19       | -3,32    | 0,73        |

| ensembl gene    | gene symbol | Score(d) | Fold Change |
|-----------------|-------------|----------|-------------|
| ENSG00000118137 | APOA1       | -3,32    | 0,83        |
| ENSG0000012223  | LTF         | -3,32    | 0,45        |
| ENSG00000104979 | C19orf53    | -3,31    | 0,79        |
| ENSG00000149932 | TMEM219     | -3,31    | 0,79        |
| ENSG00000167202 | TBC1D2B     | -3,30    | 0,60        |
| ENSG00000118523 | CTGF        | -3,30    | 0,33        |
| ENSG00000176142 | TMEM39A     | -3,30    | 0,76        |
| ENSG00000177576 | C18orf32    | -3,30    | 0,67        |
| ENSG00000115884 | SDC1        | -3,29    | 0,59        |
| ENSG00000122696 | SLC25A51    | -3,29    | 0,81        |
| ENSG00000204977 | TRIM13      | -3,29    | 0,68        |
| ENSG00000133742 | CA1         | -3,29    | 0,57        |
| ENSG00000140563 | MCTP2       | -3,29    | 0,59        |
| ENSG00000138101 | DTNB        | -3,29    | 0,73        |
| ENSG00000158473 | CD1D        | -3,29    | 0,44        |
| ENSG00000188352 | FOCAD       | -3,28    | 0,67        |
| ENSG00000176102 | CSTF3       | -3,28    | 0,61        |
| ENSG00000170092 | SPDYE5      | -3,28    | 0,73        |
| ENSG00000118690 | ARMC2       | -3,28    | 0,42        |
| ENSG00000123358 | NR4A1       | -3,28    | 0,47        |
| ENSG00000183145 | RIPPLY3     | -3,27    | 0,82        |
| ENSG00000211584 | SLC48A1     | -3,27    | 0,71        |
| ENSG00000183615 | FAM167B     | -3,27    | 0,81        |
| ENSG00000156398 | SFXN2       | -3,27    | 0,74        |
| ENSG00000185737 | NRG3        | -3,27    | 0,34        |
| ENSG00000272325 | NUDT3       | -3,27    | 0,68        |
| ENSG00000122188 | LAX1        | -3,27    | 0,43        |
| ENSG00000125740 | FOSB        | -3,27    | 0,54        |
| ENSG00000253767 | PCDHGA8     | -3,27    | 0,45        |
| ENSG00000161267 | BDH1        | -3,27    | 0,53        |
| ENSG00000171766 | GATM        | -3,27    | 0,38        |
| ENSG00000079931 | MOXD1       | -3,27    | 0,36        |
| ENSG00000186918 | ZNF395      | -3,26    | 0,60        |
| ENSG00000165238 | WNK2        | -3,26    | 0,60        |
| ENSG00000130255 | RPL36       | -3,26    | 0,70        |
| ENSG00000198917 | C9orf114    | -3,26    | 0,62        |
| ENSG00000253846 | PCDHGA10    | -3,26    | 0,48        |
| ENSG00000182986 | ZNF320      | -3,25    | 0,64        |
| ENSG00000164002 | EXO5        | -3,25    | 0,68        |
| ENSG00000170571 | EMB         | -3,25    | 0,76        |
| ENSG00000196865 | NHLRC2      | -3,25    | 0,72        |
| ENSG00000096968 | JAK2        | -3,25    | 0,65        |
| ENSG00000106771 | TMEM245     | -3,25    | 0,71        |
| ENSG00000148943 | LIN7C       | -3,25    | 0,71        |
| ENSG00000107242 | PIP5K1B     | -3,25    | 0,49        |
| ENSG00000108423 | TUBD1       | -3,25    | 0,59        |
| ENSG00000164821 | DEFA4       | -3,25    | 0,58        |
| ENSG00000128881 | TTBK2       | -3,25    | 0,74        |
| ENSG00000148229 | POLE3       | -3,25    | 0,80        |

| ensembl gene    | gene symbol | Score(d) | Fold Change |
|-----------------|-------------|----------|-------------|
| ENSG00000173914 | RBM4B       | -3,25    | 0,68        |
| ENSG00000182870 | GALNT9      | -3,24    | 0,71        |
| ENSG00000030582 | GRN         | -3,24    | 0,53        |
| ENSG00000197136 | PCNX3       | -3,24    | 0,76        |
| ENSG00000184445 | KNTC1       | -3,24    | 0,60        |
| ENSG00000132313 | MRPL35      | -3,24    | 0,63        |
| ENSG00000106723 | SPIN1       | -3,24    | 0,65        |
| ENSG00000108773 | KAT2A       | -3,24    | 0,65        |
| ENSG00000167468 | GPX4        | -3,23    | 0,72        |
| ENSG00000204424 | LY6G6F      | -3,23    | 0,62        |
| ENSG00000088387 | DOCK9       | -3,23    | 0,61        |
| ENSG00000204231 | RXRB        | -3,23    | 0,78        |
| ENSG00000198881 | ASB12       | -3,23    | 0,78        |
| ENSG00000166471 | TMEM41B     | -3,23    | 0,75        |
| ENSG00000152422 | XRCC4       | -3,23    | 0,55        |
| ENSG00000143315 | PIGM        | -3,23    | 0,63        |
| ENSG00000165185 | KIAA1958    | -3,23    | 0,71        |
| ENSG00000124588 | NQO2        | -3,23    | 0,62        |
| ENSG00000135218 | CD36        | -3,23    | 0,49        |
| ENSG00000102805 | CLN5        | -3,23    | 0,57        |
| ENSG00000116157 | GPX7        | -3,23    | 0,69        |
| ENSG00000082805 | ERC1        | -3,23    | 0,65        |
| ENSG00000133678 | TMEM254     | -3,22    | 0,69        |
| ENSG00000004939 | SLC4A1      | -3,22    | 0,61        |
| ENSG00000253537 | PCDHGA7     | -3,22    | 0,53        |
| ENSG00000175591 | P2RY2       | -3,22    | 0,58        |
| ENSG00000197822 | OCLN        | -3,22    | 0,35        |
| ENSG00000231389 | HLA-DPA1    | -3,22    | 0,43        |
| ENSG00000213920 | MDP1        | -3,21    | 0,71        |
| ENSG00000196188 | CTSE        | -3,21    | 0,67        |
| ENSG00000116750 | UCHL5       | -3,21    | 0,66        |
| ENSG00000100934 | SEC23A      | -3,21    | 0,71        |
| ENSG00000070087 | PFN2        | -3,21    | 0,47        |
| ENSG00000103876 | FAH         | -3,21    | 0,65        |
| ENSG00000153815 | CMIP        | -3,20    | 0,67        |
| ENSG00000123360 | PDE1B       | -3,20    | 0,78        |
| ENSG00000115252 | PDE1A       | -3,20    | 0,60        |
| ENSG00000168517 | HEXIM2      | -3,20    | 0,75        |
| ENSG00000136937 | NCBP1       | -3,20    | 0,74        |
| ENSG00000159322 | ADPGK       | -3,20    | 0,76        |
| ENSG00000102763 | VWA8        | -3,19    | 0,64        |
| ENSG00000182612 | TSPAN10     | -3,19    | 0,83        |
| ENSG00000112984 | KIF20A      | -3,19    | 0,58        |
| ENSG00000254999 | BRK1        | -3,19    | 0,72        |
| ENSG00000135272 | MDFIC       | -3,18    | 0,73        |
| ENSG00000160796 | NBEAL2      | -3,18    | 0,63        |
| ENSG00000114487 | MORC1       | -3,18    | 0,36        |
| ENSG00000138119 | MYOF        | -3,18    | 0,51        |
| ENSG00000171757 | LRRC34      | -3,18    | 0,57        |

| ensembl gene    | gene symbol | Score(d) | Fold Change |
|-----------------|-------------|----------|-------------|
| ENSG00000185015 | CA13        | -3,18    | 0,53        |
| ENSG00000129625 | REEP5       | -3,17    | 0,79        |
| ENSG00000171357 | LURAP1      | -3,17    | 0,87        |
| ENSG00000182492 | BGN         | -3,17    | 0,73        |
| ENSG00000224877 | C17orf89    | -3,17    | 0,77        |
| ENSG00000163832 | ELP6        | -3,17    | 0,75        |
| ENSG00000171604 | CXXC5       | -3,17    | 0,71        |
| ENSG00000072954 | TMEM38A     | -3,17    | 0,52        |
| ENSG00000148290 | SURF1       | -3,17    | 0,74        |
| ENSG00000255823 | MTRNR2L8    | -3,17    | 0,80        |
| ENSG00000050820 | BCAR1       | -3,16    | 0,72        |
| ENSG00000166167 | BTRC        | -3,16    | 0,73        |
| ENSG00000075568 | TMEM131     | -3,16    | 0,73        |
| ENSG00000175699 | LINC00521   | -3,16    | 0,83        |
| ENSG00000196329 | GIMAP5      | -3,16    | 0,54        |
| ENSG00000122176 | FMOD        | -3,15    | 0,79        |
| ENSG00000176978 | DPP7        | -3,15    | 0,67        |
| ENSG00000011243 | AKAP8L      | -3,15    | 0,81        |
| ENSG00000172728 | FUT10       | -3,15    | 0,70        |
| ENSG00000204060 | FOXO6       | -3,15    | 0,78        |
| ENSG00000196735 | HLA-DQA1    | -3,15    | 0,48        |
| ENSG00000196290 | NIF3L1      | -3,14    | 0,67        |
| ENSG00000181704 | YIPF6       | -3,14    | 0,74        |
| ENSG00000103512 | NOMO1       | -3,14    | 0,59        |
| ENSG00000105767 | CADM4       | -3,14    | 0,44        |
| ENSG00000197429 | IPP         | -3,14    | 0,55        |
| ENSG00000204149 | AGAP6       | -3,14    | 0,76        |
| ENSG00000008438 | PGLYRP1     | -3,14    | 0,61        |
| ENSG00000213865 | C8orf44     | -3,14    | 0,65        |
| ENSG00000188938 | FAM120AOS   | -3,14    | 0,76        |
| ENSG00000204682 | CASC10      | -3,14    | 0,84        |
| ENSG00000173120 | KDM2A       | -3,14    | 0,72        |
| ENSG00000198732 | SMOC1       | -3,13    | 0,44        |
| ENSG00000144619 | CNTN4       | -3,13    | 0,63        |
| ENSG00000167110 | GOLGA2      | -3,13    | 0,76        |
| ENSG00000100985 | MMP9        | -3,13    | 0,48        |
| ENSG00000091010 | POU4F3      | -3,13    | 0,84        |
| ENSG00000066468 | FGFR2       | -3,13    | 0,74        |
| ENSG00000073754 | CD5L        | -3,13    | 0,53        |
| ENSG00000239264 | TXNDC5      | -3,13    | 0,59        |
| ENSG00000152700 | SAR1B       | -3,13    | 0,75        |
| ENSG00000198478 | SH3BGRL2    | -3,13    | 0,46        |
| ENSG00000170122 | FOXD4       | -3,12    | 0,57        |
| ENSG00000104660 | LEPROTL1    | -3,12    | 0,72        |
| ENSG00000078967 | UBE2D4      | -3,12    | 0,73        |
| ENSG00000164620 | RELL2       | -3,12    | 0,73        |
| ENSG00000120738 | EGR1        | -3,12    | 0,44        |
| ENSG00000126545 | CSN1S1      | -3,12    | 0,66        |
| ENSG00000175390 | EIF3F       | -3,12    | 0,81        |

| ensembl gene    | gene symbol | Score(d) | Fold Change |
|-----------------|-------------|----------|-------------|
| ENSG00000198108 | CHSY3       | -3,11    | 0,36        |
| ENSG00000169220 | RGS14       | -3,11    | 0,77        |
| ENSG00000166762 | CATSPER2    | -3,11    | 0,69        |
| ENSG00000105997 | HOXA3       | -3,11    | 0,77        |
| ENSG00000108559 | NUP88       | -3,11    | 0,71        |
| ENSG00000137070 | IL11RA      | -3,11    | 0,73        |
| ENSG00000127364 | TAS2R4      | -3,10    | 0,70        |
| ENSG00000179909 | ZNF154      | -3,10    | 0,53        |
| ENSG00000164040 | PGRMC2      | -3,10    | 0,77        |
| ENSG00000163002 | NUP35       | -3,10    | 0,76        |
| ENSG00000162482 | AKR7A3      | -3,10    | 0,79        |
| ENSG00000160588 | MPZL3       | -3,10    | 0,57        |
| ENSG00000010278 | CD9         | -3,10    | 0,38        |
| ENSG00000134326 | CMPK2       | -3,10    | 0,38        |
| ENSG00000105726 | ATP13A1     | -3,10    | 0,71        |
| ENSG00000253159 | PCDHGA12    | -3,09    | 0,54        |
| ENSG00000151623 | NR3C2       | -3,09    | 0,62        |
| ENSG00000144120 | TMEM177     | -3,09    | 0,58        |
| ENSG00000182150 | ERCC6L2     | -3,09    | 0,70        |
| ENSG00000198833 | UBE2J1      | -3,09    | 0,86        |
| ENSG00000048462 | TNFRSF17    | -3,09    | 0,59        |
| ENSG00000169871 | TRIM56      | -3,08    | 0,67        |
| ENSG00000243927 | MRPS6       | -3,08    | 0,72        |
| ENSG00000139329 | LUM         | -3,08    | 0,65        |
| ENSG00000188581 | KRTAP1-1    | -3,08    | 0,81        |
| ENSG00000241233 | KRTAP5-8    | -3,08    | 0,74        |
| ENSG00000186088 | GSAP        | -3,07    | 0,68        |
| ENSG00000103363 | TCEB2       | -3,07    | 0,71        |
| ENSG00000175567 | UCP2        | -3,07    | 0,60        |
| ENSG00000108417 | KRT37       | -3,07    | 0,82        |
| ENSG00000181555 | SETD2       | -3,07    | 0,77        |
| ENSG00000172139 | SLC9C1      | -3,07    | 0,61        |
| ENSG00000162241 | SLC25A45    | -3,07    | 0,74        |
| ENSG00000139629 | GALNT6      | -3,06    | 0,70        |
| ENSG00000115275 | MOGS        | -3,06    | 0,73        |
| ENSG00000144504 | ANKMY1      | -3,06    | 0,74        |
| ENSG00000165966 | PDZRN4      | -3,06    | 0,48        |
| ENSG00000159792 | PSKH1       | -3,06    | 0,82        |
| ENSG00000183807 | FAM162B     | -3,06    | 0,88        |
| ENSG00000111341 | MGP         | -3,05    | 0,66        |
| ENSG00000172590 | MRPL52      | -3,05    | 0,76        |
| ENSG00000138722 | MMRN1       | -3,05    | 0,48        |
| ENSG00000127415 | IDUA        | -3,05    | 0,67        |
| ENSG00000089006 | SNX5        | -3,05    | 0,77        |
| ENSG00000132470 | ITGB4       | -3,05    | 0,74        |
| ENSG00000168872 | DDX19A      | -3,05    | 0,73        |
| ENSG00000149357 | LAMTOR1     | -3,05    | 0,77        |
| ENSG00000187607 | ZNF286A     | -3,04    | 0,69        |
| ENSG00000204361 | NXPE2       | -3,04    | 0,71        |

| ensembl gene    | gene symbol | Score(d) | Fold Change |
|-----------------|-------------|----------|-------------|
| ENSG00000101353 | MROH8       | -3,04    | 0,67        |
| ENSG00000108840 | HDAC5       | -3,04    | 0,74        |
| ENSG00000205464 | ATP6AP1L    | -3,04    | 0,67        |
| ENSG00000172650 | AGAP5       | -3,04    | 0,64        |
| ENSG00000164047 | CAMP        | -3,04    | 0,71        |
| ENSG00000104133 | SPG11       | -3,04    | 0,69        |
| ENSG00000150244 | TRIM48      | -3,04    | 0,75        |
| ENSG00000254901 | BORCS8      | -3,04    | 0,65        |
| ENSG00000276234 | TADA2A      | -3,04    | 0,66        |
| ENSG00000099834 | CDHR5       | -3,03    | 0,84        |
| ENSG00000213199 | ASIC3       | -3,03    | 0,77        |
| ENSG00000115607 | IL18RAP     | -3,03    | 0,58        |
| ENSG00000186132 | C2orf76     | -3,03    | 0,72        |
| ENSG00000198520 | C1orf228    | -3,03    | 0,67        |
| ENSG00000112232 | KHDRBS2     | -3,03    | 0,39        |
| ENSG00000204420 | C6orf25     | -3,03    | 0,75        |
| ENSG00000158825 | CDA         | -3,03    | 0,63        |
| ENSG00000003400 | CASP10      | -3,03    | 0,64        |
| ENSG00000185989 | RASA3       | -3,03    | 0,61        |
| ENSG00000158856 | DMTN        | -3,02    | 0,69        |
| ENSG00000159618 | ADGRG5      | -3,02    | 0,44        |
| ENSG00000275074 | NUDT18      | -3,02    | 0,84        |
| ENSG00000111785 | RIC8B       | -3,02    | 0,72        |
| ENSG00000115380 | EFEMP1      | -3,02    | 0,32        |
| ENSG00000106404 | CLDN15      | -3,02    | 0,77        |
| ENSG00000084110 | HAL         | -3,02    | 0,74        |
| ENSG00000035720 | STAP1       | -3,02    | 0,32        |
| ENSG00000155846 | PPARGC1B    | -3,02    | 0,67        |
| ENSG00000183723 | CMTM4       | -3,02    | 0,64        |
| ENSG00000173578 | XCR1        | -3,02    | 0,81        |
| ENSG00000170180 | GYPA        | -3,02    | 0,57        |
| ENSG00000101958 | GLRA2       | -3,02    | 0,84        |
| ENSG00000168389 | MFSD2A      | -3,02    | 0,55        |
| ENSG00000178229 | ZNF543      | -3,01    | 0,73        |
| ENSG00000169180 | XPO6        | -3,01    | 0,80        |
| ENSG00000172780 | RAB43       | -3,01    | 0,71        |
| ENSG00000233493 | TMEM238     | -3,01    | 0,65        |
| ENSG00000124491 | F13A1       | -3,01    | 0,51        |
| ENSG00000141956 | PRDM15      | -3,01    | 0,47        |
| ENSG00000104691 | UBXN8       | -3,01    | 0,62        |
| ENSG00000106066 | CPVL        | -3,01    | 0,44        |
| ENSG00000122877 | EGR2        | -3,01    | 0,38        |
| ENSG00000256436 | TAS2R31     | -3,01    | 0,64        |
| ENSG00000111077 | TNS2        | -3,01    | 0,84        |
| ENSG00000118096 | IFT46       | -3,01    | 0,66        |
| ENSG00000197734 | C14orf178   | -3,01    | 0,82        |
| ENSG00000133030 | MPRIP       | -3,01    | 0,73        |
| ENSG00000130818 | ZNF426      | -3,00    | 0,58        |
| ENSG00000136371 | MTHFS       | -3,00    | 0,75        |



| ensembl gene    | gene symbol | Score(d) | Fold Change |
|-----------------|-------------|----------|-------------|
| ENSG00000022267 | FHL1        | -3,00    | 0,38        |
| ENSG00000084693 | AGBL5       | -3,00    | 0,71        |
| ENSG00000187741 | FANCA       | -3,00    | 0,64        |
| ENSG00000205155 | PSENN       | -3,00    | 0,74        |
| ENSG00000172992 | DCAKD       | -3,00    | 0,71        |
| ENSG00000171097 | KYAT1       | -3,00    | 0,79        |
| ENSG00000134215 | VAV3        | -3,00    | 0,47        |
| ENSG00000064393 | HIPK2       | -2,99    | 0,73        |
| ENSG00000185664 | PMEL        | -2,99    | 0,72        |
| ENSG00000182919 | C11orf54    | -2,99    | 0,69        |
| ENSG00000213619 | NDUFS3      | -2,99    | 0,76        |
| ENSG00000166211 | SPIC        | -2,99    | 0,49        |
| ENSG00000261934 | PCDHGA9     | -2,99    | 0,57        |
| ENSG00000205476 | CCDC85C     | -2,99    | 0,82        |
| ENSG00000277893 | SRD5A2      | -2,99    | 0,81        |
| ENSG00000067992 | PDK3        | -2,99    | 0,66        |
| ENSG00000173237 | C11orf86    | -2,99    | 0,87        |
| ENSG00000187559 | FOXD4L3     | -2,99    | 0,78        |
| ENSG00000072756 | TRNT1       | -2,99    | 0,72        |
| ENSG00000107249 | GLIS3       | -2,99    | 0,34        |
| ENSG00000099364 | FBXL19      | -2,99    | 0,74        |
| ENSG00000134827 | TCN1        | -2,99    | 0,53        |
| ENSG00000111269 | CREBL2      | -2,98    | 0,72        |
| ENSG00000205076 | LGALS7      | -2,98    | 0,71        |
| ENSG00000109452 | INPP4B      | -2,98    | 0,59        |
| ENSG00000182742 | HOXB4       | -2,98    | 0,79        |
| ENSG00000167964 | RAB26       | -2,98    | 0,76        |
| ENSG00000130475 | FCHO1       | -2,98    | 0,72        |
| ENSG00000127511 | SIN3B       | -2,98    | 0,79        |
| ENSG00000068784 | SRBD1       | -2,98    | 0,71        |
| ENSG00000114125 | RNF7        | -2,98    | 0,57        |
| ENSG00000083814 | ZNF671      | -2,98    | 0,71        |
| ENSG00000178802 | MPI         | -2,98    | 0,70        |
| ENSG00000111203 | ITFG2       | -2,98    | 0,73        |
| ENSG00000175130 | MARCKSL1    | -2,97    | 0,76        |
| ENSG00000124181 | PLCG1       | -2,97    | 0,78        |
| ENSG00000143819 | EPHX1       | -2,97    | 0,58        |
| ENSG00000161010 | C5orf45     | -2,97    | 0,77        |
| ENSG00000149294 | NCAM1       | -2,97    | 0,24        |
| ENSG00000249948 | GBA3        | -2,97    | 0,37        |
| ENSG00000142046 | TMEM91      | -2,97    | 0,75        |
| ENSG00000181408 | UTS2R       | -2,97    | 0,66        |
| ENSG00000101425 | BPI         | -2,97    | 0,56        |
| ENSG00000145781 | COMMD10     | -2,96    | 0,75        |
| ENSG00000177628 | GBA         | -2,96    | 0,68        |
| ENSG00000163960 | UBXN7       | -2,96    | 0,75        |
| ENSG00000122641 | INHBA       | -2,96    | 0,84        |
| ENSG00000155099 | TMEM55A     | -2,96    | 0,71        |
| ENSG00000065485 | PDIA5       | -2,96    | 0,68        |

| ensembl gene    | gene symbol   | Score(d) | Fold Change |
|-----------------|---------------|----------|-------------|
| ENSG00000166317 | SYNPO2L       | -2,96    | 0,71        |
| ENSG00000037757 | MRI1          | -2,96    | 0,66        |
| ENSG00000163406 | SLC15A2       | -2,95    | 0,52        |
| ENSG00000168404 | MLKL          | -2,95    | 0,55        |
| ENSG00000094916 | CBX5          | -2,95    | 0,66        |
| ENSG00000157554 | ERG           | -2,95    | 0,78        |
| ENSG00000178150 | ZNF114        | -2,95    | 0,81        |
| ENSG00000140749 | IGSF6         | -2,95    | 0,57        |
| ENSG00000116128 | BCL9          | -2,95    | 0,63        |
| ENSG00000132182 | NUP210        | -2,95    | 0,68        |
| ENSG00000204713 | TRIM27        | -2,95    | 0,77        |
| ENSG00000105372 | RPS19         | -2,95    | 0,72        |
| ENSG00000189298 | ZKSCAN3       | -2,95    | 0,74        |
| ENSG00000134007 | ADAM20        | -2,95    | 0,74        |
| ENSG00000164627 | KIF6          | -2,95    | 0,60        |
| ENSG00000113108 | APBB3         | -2,95    | 0,72        |
| ENSG00000171388 | APLN          | -2,95    | 0,83        |
| ENSG00000164241 | C5orf63       | -2,95    | 0,57        |
| ENSG00000100448 | CTSG          | -2,95    | 0,60        |
| ENSG00000186889 | TMEM17        | -2,94    | 0,68        |
| ENSG00000258417 | RP11-240B13.2 | -2,94    | 0,64        |
| ENSG00000116729 | WLS           | -2,94    | 0,49        |
| ENSG00000115652 | UXS1          | -2,94    | 0,70        |
| ENSG00000263465 | SRSF8         | -2,94    | 0,78        |
| ENSG00000105352 | CEACAM4       | -2,94    | 0,77        |
| ENSG00000135407 | AVIL          | -2,94    | 0,70        |
| ENSG00000123329 | ARHGAP9       | -2,94    | 0,76        |
| ENSG00000152582 | SPEF2         | -2,94    | 0,63        |
| ENSG00000182022 | CHST15        | -2,94    | 0,72        |
| ENSG00000105829 | BET1          | -2,94    | 0,59        |
| ENSG00000171843 | MLLT3         | -2,94    | 0,59        |
| ENSG00000128928 | IVD           | -2,94    | 0,72        |
| ENSG00000153707 | PTPRD         | -2,93    | 0,46        |
| ENSG00000205085 | FAM71F2       | -2,93    | 0,67        |
| ENSG00000175893 | ZDHHC21       | -2,93    | 0,62        |
| ENSG00000198130 | HIBCH         | -2,93    | 0,65        |
| ENSG00000077157 | PPP1R12B      | -2,93    | 0,64        |
| ENSG00000189091 | SF3B3         | -2,92    | 0,69        |
| ENSG00000184148 | SPRR4         | -2,92    | 0,84        |
| ENSG00000165202 | OR1Q1         | -2,92    | 0,56        |
| ENSG00000162139 | NEU3          | -2,92    | 0,66        |
| ENSG00000221970 | OR2A1         | -2,92    | 0,72        |
| ENSG00000100365 | NCF4          | -2,92    | 0,53        |
| ENSG00000119927 | GPAM          | -2,91    | 0,69        |
| ENSG00000106686 | SPATA6L       | -2,91    | 0,64        |
| ENSG00000100234 | TIMP3         | -2,91    | 0,78        |
| ENSG00000109083 | IFT20         | -2,91    | 0,77        |
| ENSG00000176422 | SPRYD4        | -2,91    | 0,68        |
| ENSG00000115486 | GGCX          | -2,91    | 0,77        |

| ensembl gene    | gene symbol | Score(d) | Fold Change |
|-----------------|-------------|----------|-------------|
| ENSG00000186166 | CCDC84      | -2,91    | 0,73        |
| ENSG00000149262 | INTS4       | -2,91    | 0,74        |
| ENSG00000240891 | PLCXD2      | -2,91    | 0,59        |
| ENSG00000181027 | FKRP        | -2,90    | 0,78        |
| ENSG00000132507 | EIF5A       | -2,90    | 0,70        |
| ENSG00000073417 | PDE8A       | -2,90    | 0,73        |
| ENSG00000119535 | CSF3R       | -2,90    | 0,57        |
| ENSG00000198832 | SELM        | -2,90    | 0,63        |
| ENSG00000133424 | LARGE1      | -2,90    | 0,41        |
| ENSG00000135443 | KRT85       | -2,90    | 0,83        |
| ENSG00000135205 | CCDC146     | -2,90    | 0,66        |
| ENSG00000235750 | KIAA0040    | -2,90    | 0,69        |
| ENSG00000134138 | MEIS2       | -2,90    | 0,42        |
| ENSG00000169118 | CSNK1G1     | -2,89    | 0,70        |
| ENSG00000254834 | OR5M10      | -2,89    | 0,67        |
| ENSG00000254858 | MPV17L2     | -2,89    | 0,62        |
| ENSG00000188687 | SLC4A5      | -2,89    | 0,58        |
| ENSG00000125734 | GPR108      | -2,89    | 0,77        |
| ENSG00000144021 | CIAO1       | -2,89    | 0,80        |
| ENSG00000179889 | PDXDC1      | -2,88    | 0,74        |
| ENSG00000170345 | FOS         | -2,88    | 0,61        |
| ENSG00000079385 | CEACAM1     | -2,88    | 0,54        |
| ENSG00000214413 | BBIP1       | -2,88    | 0,72        |
| ENSG00000169900 | PYDC1       | -2,88    | 0,76        |
| ENSG00000072071 | ADGRL1      | -2,88    | 0,75        |
| ENSG00000162694 | EXTL2       | -2,88    | 0,51        |
| ENSG00000165209 | STRBP       | -2,88    | 0,63        |
| ENSG00000160213 | CSTB        | -2,88    | 0,76        |
| ENSG00000152192 | POU4F1      | -2,88    | 0,56        |
| ENSG00000100368 | CSF2RB      | -2,88    | 0,53        |
| ENSG00000001631 | KRIT1       | -2,88    | 0,80        |
| ENSG00000175455 | CCDC14      | -2,88    | 0,63        |
| ENSG00000205364 | MT1M        | -2,87    | 0,81        |
| ENSG00000157833 | GAREM2      | -2,87    | 0,72        |
| ENSG00000163563 | MNDA        | -2,87    | 0,52        |
| ENSG00000183251 | OR51B4      | -2,87    | 0,73        |
| ENSG00000164975 | SNAPC3      | -2,87    | 0,62        |
| ENSG00000127663 | KDM4B       | -2,87    | 0,75        |
| ENSG00000117091 | CD48        | -2,87    | 0,52        |
| ENSG00000170819 | BFSP2       | -2,87    | 0,76        |
| ENSG00000163348 | PYGO2       | -2,87    | 0,51        |
| ENSG00000258839 | MC1R        | -2,87    | 0,78        |
| ENSG00000103381 | CPPED1      | -2,86    | 0,55        |
| ENSG00000163295 | ALPI        | -2,86    | 0,81        |
| ENSG00000256294 | ZNF225      | -2,86    | 0,72        |
| ENSG00000161980 | POLR3K      | -2,86    | 0,65        |
| ENSG00000100647 | SUSD6       | -2,86    | 0,67        |
| ENSG00000150907 | FOXO1       | -2,86    | 0,66        |
| ENSG00000116209 | TMEM59      | -2,86    | 0,74        |

| ensembl gene    | gene symbol | Score(d) | Fold Change |
|-----------------|-------------|----------|-------------|
| ENSG00000120158 | RCL1        | -2,86    | 0,76        |
| ENSG00000204852 | TCTN1       | -2,86    | 0,60        |
| ENSG00000135297 | MTO1        | -2,86    | 0,70        |
| ENSG00000100429 | HDAC10      | -2,86    | 0,50        |
| ENSG00000115204 | MPV17       | -2,85    | 0,74        |
| ENSG00000163785 | RYK         | -2,85    | 0,76        |
| ENSG00000072694 | FCGR2B      | -2,85    | 0,55        |
| ENSG00000225873 | LINC00694   | -2,85    | 0,82        |
| ENSG00000108433 | GOSR2       | -2,85    | 0,79        |
| ENSG00000008869 | HEATR5B     | -2,85    | 0,67        |
| ENSG00000167264 | DUS2        | -2,85    | 0,63        |
| ENSG00000154928 | EPHB1       | -2,85    | 0,54        |
| ENSG00000111271 | ACAD10      | -2,85    | 0,73        |
| ENSG00000128739 | SNRPN       | -2,85    | 0,74        |
| ENSG00000128594 | LRRC4       | -2,85    | 0,82        |
| ENSG00000091409 | ITGA6       | -2,84    | 0,52        |
| ENSG00000206177 | HBM         | -2,84    | 0,75        |
| ENSG00000115677 | HDLBP       | -2,84    | 0,81        |
| ENSG00000175938 | ORAI3       | -2,84    | 0,75        |
| ENSG00000105538 | RASIP1      | -2,84    | 0,82        |
| ENSG00000167614 | TTYH1       | -2,84    | 0,83        |
| ENSG00000147905 | ZCCHC7      | -2,84    | 0,72        |
| ENSG00000102349 | KLF8        | -2,84    | 0,73        |
| ENSG00000129197 | RPAIN       | -2,84    | 0,76        |
| ENSG00000121211 | MND1        | -2,84    | 0,60        |
| ENSG00000242550 | SERPINB10   | -2,84    | 0,64        |
| ENSG00000111679 | PTPN6       | -2,84    | 0,61        |
| ENSG00000243317 | C7orf73     | -2,84    | 0,77        |
| ENSG00000167280 | ENGASE      | -2,84    | 0,71        |
| ENSG00000111653 | ING4        | -2,83    | 0,74        |
| ENSG00000149564 | ESAM        | -2,83    | 0,56        |
| ENSG00000174444 | RPL4        | -2,83    | 0,79        |
| ENSG00000171552 | BCL2L1      | -2,83    | 0,64        |
| ENSG00000115042 | FAHD2A      | -2,83    | 0,70        |
| ENSG00000179152 | TCAIM       | -2,83    | 0,57        |
| ENSG00000134716 | CYP2J2      | -2,83    | 0,59        |
| ENSG00000105771 | SMG9        | -2,82    | 0,73        |
| ENSG00000131069 | ACSS2       | -2,82    | 0,68        |
| ENSG00000189401 | OTUD6A      | -2,82    | 0,87        |
| ENSG00000148400 | NOTCH1      | -2,82    | 0,73        |
| ENSG00000183508 | FAM46C      | -2,82    | 0,70        |
| ENSG00000176900 | OR51T1      | -2,82    | 0,88        |
| ENSG00000081052 | COL4A4      | -2,82    | 0,78        |
| ENSG00000253910 | PCDHGB2     | -2,82    | 0,59        |
| ENSG00000082196 | C1QTNF3     | -2,82    | 0,64        |
| ENSG00000160688 | FLAD1       | -2,82    | 0,70        |
| ENSG00000188613 | NANOS1      | -2,81    | 0,65        |
| ENSG00000168813 | ZNF507      | -2,81    | 0,74        |
| ENSG00000161791 | FMNL3       | -2,81    | 0,56        |

| ensembl gene    | gene symbol | Score(d) | Fold Change |
|-----------------|-------------|----------|-------------|
| ENSG00000186185 | KIF18B      | -2,81    | 0,83        |
| ENSG00000163138 | PACRGL      | -2,81    | 0,67        |
| ENSG00000133812 | SBF2        | -2,81    | 0,56        |
| ENSG00000165282 | PIGO        | -2,81    | 0,75        |
| ENSG00000112175 | BMP5        | -2,81    | 0,82        |
| ENSG00000155629 | PIK3AP1     | -2,81    | 0,63        |
| ENSG00000124802 | EEF1E1      | -2,81    | 0,51        |
| ENSG00000086696 | HSD17B2     | -2,81    | 0,76        |
| ENSG00000145604 | SKP2        | -2,81    | 0,60        |
| ENSG00000166965 | RCCD1       | -2,81    | 0,79        |
| ENSG00000183337 | BCOR        | -2,81    | 0,68        |
| ENSG00000198301 | SDAD1       | -2,81    | 0,81        |
| ENSG00000058668 | ATP2B4      | -2,80    | 0,49        |
| ENSG00000198513 | ATL1        | -2,80    | 0,67        |
| ENSG00000167196 | FBXO22      | -2,80    | 0,74        |
| ENSG00000112624 | GLTSCR1L    | -2,80    | 0,79        |
| ENSG00000087085 | ACHE        | -2,80    | 0,76        |
| ENSG00000102595 | UGGT2       | -2,80    | 0,43        |
| ENSG00000228486 | LINC01125   | -2,80    | 0,77        |
| ENSG00000144115 | THNSL2      | -2,80    | 0,61        |
| ENSG00000091136 | LAMB1       | -2,80    | 0,74        |
| ENSG00000170142 | UBE2E1      | -2,80    | 0,72        |
| ENSG00000141425 | RPRD1A      | -2,80    | 0,76        |
| ENSG00000171443 | ZNF524      | -2,79    | 0,84        |
| ENSG00000131495 | NDUFA2      | -2,79    | 0,73        |
| ENSG00000037042 | TUBG2       | -2,79    | 0,69        |
| ENSG00000109079 | TNFAIP1     | -2,79    | 0,78        |
| ENSG00000185591 | SP1         | -2,79    | 0,77        |
| ENSG00000237649 | KIFC1       | -2,79    | 0,67        |
| ENSG00000050748 | MAPK9       | -2,79    | 0,72        |
| ENSG00000183454 | GRIN2A      | -2,79    | 0,75        |
| ENSG00000183722 | LHFP        | -2,78    | 0,83        |
| ENSG00000099330 | OCEL1       | -2,78    | 0,86        |
| ENSG00000143851 | PTPN7       | -2,78    | 0,64        |
| ENSG00000241119 | UGT1A9      | -2,78    | 0,79        |
| ENSG00000179172 | HNRNPCL1    | -2,78    | 0,82        |
| ENSG00000135083 | CCNJL       | -2,78    | 0,78        |
| ENSG00000136828 | RALGPS1     | -2,78    | 0,71        |
| ENSG00000267508 | ZNF285      | -2,78    | 0,80        |
| ENSG00000144668 | ITGA9       | -2,77    | 0,71        |
| ENSG00000179104 | TMTC2       | -2,77    | 0,68        |
| ENSG00000130726 | TRIM28      | -2,77    | 0,75        |
| ENSG00000071564 | TCF3        | -2,77    | 0,80        |
| ENSG00000243244 | STON1       | -2,77    | 0,76        |
| ENSG00000196411 | EPHB4       | -2,77    | 0,80        |
| ENSG00000185344 | ATP6V0A2    | -2,77    | 0,78        |
| ENSG00000119866 | BCL11A      | -2,77    | 0,52        |
| ENSG00000136104 | RNASEH2B    | -2,77    | 0,70        |
| ENSG00000153982 | GDPD1       | -2,77    | 0,44        |

| ensembl gene    | gene symbol | Score(d) | Fold Change |
|-----------------|-------------|----------|-------------|
| ENSG00000118600 | TMEM5       | -2,77    | 0,75        |
| ENSG00000105649 | RAB3A       | -2,77    | 0,71        |
| ENSG00000148655 | C10orf11    | -2,77    | 0,47        |
| ENSG00000125648 | SLC25A23    | -2,76    | 0,62        |
| ENSG00000148219 | ASTN2       | -2,76    | 0,87        |
| ENSG00000168056 | LTBP3       | -2,76    | 0,64        |
| ENSG00000187026 | KRTAP21-2   | -2,76    | 0,85        |
| ENSG00000166848 | TERF2IP     | -2,76    | 0,69        |
| ENSG00000091428 | RAPGEF4     | -2,76    | 0,47        |
| ENSG00000120333 | MRPS14      | -2,76    | 0,63        |
| ENSG00000101138 | CSTF1       | -2,76    | 0,78        |
| ENSG00000120279 | MYCT1       | -2,76    | 0,77        |
| ENSG00000254221 | PCDHGB1     | -2,76    | 0,55        |
| ENSG00000166801 | FAM111A     | -2,76    | 0,67        |
| ENSG00000013503 | POLR3B      | -2,76    | 0,69        |
| ENSG00000059145 | UNKL        | -2,75    | 0,83        |
| ENSG00000138606 | SHF         | -2,75    | 0,76        |
| ENSG00000221995 | TIAF1       | -2,75    | 0,72        |
| ENSG00000177311 | ZBTB38      | -2,75    | 0,63        |
| ENSG00000120675 | DNAJC15     | -2,75    | 0,71        |
| ENSG00000143546 | S100A8      | -2,75    | 0,59        |
| ENSG00000061337 | LZTS1       | -2,75    | 0,81        |
| ENSG00000170348 | TMED10      | -2,75    | 0,78        |
| ENSG00000157077 | ZFYVE9      | -2,75    | 0,66        |
| ENSG00000111199 | TRPV4       | -2,75    | 0,87        |
| ENSG00000158805 | ZNF276      | -2,74    | 0,77        |
| ENSG00000135824 | RGS8        | -2,74    | 0,79        |
| ENSG00000214357 | NEURL1B     | -2,74    | 0,86        |
| ENSG00000120899 | PTK2B       | -2,74    | 0,71        |
| ENSG00000125378 | BMP4        | -2,74    | 0,39        |
| ENSG00000115760 | BIRC6       | -2,74    | 0,77        |
| ENSG00000111859 | NEDD9       | -2,74    | 0,48        |
| ENSG00000007541 | PIGQ        | -2,74    | 0,73        |
| ENSG00000124574 | ABCC10      | -2,74    | 0,75        |
| ENSG00000173875 | ZNF791      | -2,74    | 0,75        |
| ENSG00000164576 | SAP30L      | -2,74    | 0,75        |
| ENSG00000170382 | LRRN2       | -2,74    | 0,54        |
| ENSG00000063180 | CA11        | -2,74    | 0,78        |
| ENSG00000173391 | OLR1        | -2,74    | 0,65        |
| ENSG00000109929 | SC5D        | -2,73    | 0,57        |
| ENSG00000114446 | IFT57       | -2,73    | 0,75        |
| ENSG00000107099 | DOCK8       | -2,73    | 0,68        |
| ENSG00000144711 | IQSEC1      | -2,73    | 0,70        |
| ENSG00000103227 | LMF1        | -2,73    | 0,61        |
| ENSG00000140876 | NUDT7       | -2,73    | 0,71        |
| ENSG00000166797 | FAM96A      | -2,73    | 0,70        |
| ENSG00000169607 | CKAP2L      | -2,73    | 0,63        |
| ENSG00000196715 | VKORC1L1    | -2,73    | 0,72        |
| ENSG00000127022 | CANX        | -2,73    | 0,87        |

| ensembl gene    | gene symbol | Score(d) | Fold Change |
|-----------------|-------------|----------|-------------|
| ENSG00000131732 | ZCCHC9      | -2,73    | 0,70        |
| ENSG00000135248 | FAM71F1     | -2,73    | 0,82        |
| ENSG00000131196 | NFATC1      | -2,73    | 0,67        |
| ENSG00000112936 | C7          | -2,73    | 0,63        |
| ENSG00000146083 | RNF44       | -2,73    | 0,74        |
| ENSG00000072858 | SIDT1       | -2,73    | 0,54        |
| ENSG00000230510 | PPP5D1      | -2,72    | 0,81        |
| ENSG00000196911 | KPNA5       | -2,72    | 0,72        |
| ENSG00000144231 | POLR2D      | -2,72    | 0,72        |
| ENSG00000152464 | RPP38       | -2,72    | 0,79        |
| ENSG00000122729 | ACO1        | -2,72    | 0,73        |
| ENSG00000158161 | EYA3        | -2,72    | 0,72        |
| ENSG00000171303 | KCNK3       | -2,72    | 0,89        |
| ENSG00000166313 | APBB1       | -2,72    | 0,76        |
| ENSG00000169495 | HTRA4       | -2,72    | 0,86        |
| ENSG00000167635 | ZNF146      | -2,72    | 0,71        |
| ENSG00000186529 | CYP4F3      | -2,71    | 0,60        |
| ENSG00000107021 | TBC1D13     | -2,71    | 0,74        |
| ENSG00000069020 | MAST4       | -2,71    | 0,61        |
| ENSG00000138443 | ABI2        | -2,71    | 0,67        |
| ENSG00000171735 | CAMTA1      | -2,71    | 0,81        |
| ENSG00000113716 | HMGXB3      | -2,71    | 0,83        |
| ENSG00000182504 | CEP97       | -2,71    | 0,64        |
| ENSG00000125166 | GOT2        | -2,71    | 0,73        |
| ENSG00000140853 | NLRC5       | -2,70    | 0,65        |
| ENSG00000186638 | KIF24       | -2,70    | 0,72        |
| ENSG00000155530 | LRGUK       | -2,70    | 0,75        |
| ENSG00000136240 | KDELRL2     | -2,70    | 0,79        |
| ENSG00000158985 | CDC42SE2    | -2,70    | 0,66        |
| ENSG00000168288 | MMADHC      | -2,70    | 0,66        |
| ENSG00000081692 | JMJD4       | -2,70    | 0,73        |
| ENSG00000119912 | IDE         | -2,70    | 0,79        |
| ENSG00000186399 | GOLGA8R     | -2,70    | 0,70        |
| ENSG00000204936 | CD177       | -2,70    | 0,63        |
| ENSG00000141627 | DYM         | -2,69    | 0,80        |
| ENSG00000101040 | ZMYND8      | -2,69    | 0,69        |
| ENSG00000160716 | CHRNA2      | -2,69    | 0,85        |
| ENSG00000178896 | EXOSC4      | -2,69    | 0,68        |
| ENSG00000132694 | ARHGEF11    | -2,69    | 0,74        |
| ENSG00000253797 | UTP14C      | -2,69    | 0,76        |
| ENSG00000135070 | ISCA1       | -2,69    | 0,84        |
| ENSG00000064687 | ABCA7       | -2,69    | 0,75        |
| ENSG00000242419 | PCDHGC4     | -2,69    | 0,70        |
| ENSG00000100034 | PPM1F       | -2,69    | 0,81        |
| ENSG00000121858 | TNFSF10     | -2,69    | 0,53        |
| ENSG00000175857 | GAPT        | -2,69    | 0,68        |
| ENSG00000139192 | TAPBPL      | -2,69    | 0,73        |
| ENSG00000180386 | KRTAP9-7    | -2,69    | 0,81        |
| ENSG00000164405 | UQCRCQ      | -2,69    | 0,78        |

| ensembl gene    | gene symbol | Score(d) | Fold Change |
|-----------------|-------------|----------|-------------|
| ENSG00000000419 | DPM1        | -2,68    | 0,69        |
| ENSG00000185920 | PTCH1       | -2,68    | 0,50        |
| ENSG00000163513 | TGFBR2      | -2,68    | 0,52        |
| ENSG00000129993 | CBFA2T3     | -2,68    | 0,72        |
| ENSG00000137478 | FCHSD2      | -2,68    | 0,61        |
| ENSG00000168286 | THAP11      | -2,68    | 0,82        |
| ENSG00000204956 | PCDHGA1     | -2,68    | 0,59        |
| ENSG00000136709 | WDR33       | -2,68    | 0,79        |
| ENSG00000117691 | NENF        | -2,68    | 0,69        |
| ENSG00000069943 | PIGB        | -2,68    | 0,67        |
| ENSG00000215474 | SKOR2       | -2,68    | 0,86        |
| ENSG00000137414 | FAM8A1      | -2,68    | 0,76        |
| ENSG00000154429 | CCSAP       | -2,68    | 0,63        |
| ENSG00000151632 | AKR1C2      | -2,67    | 0,76        |
| ENSG00000126461 | SCAF1       | -2,67    | 0,82        |
| ENSG00000186395 | KRT10       | -2,67    | 0,63        |
| ENSG00000169962 | TAS1R3      | -2,67    | 0,70        |
| ENSG00000125864 | BFSP1       | -2,67    | 0,75        |
| ENSG00000018280 | SLC11A1     | -2,67    | 0,66        |
| ENSG00000198198 | SZT2        | -2,67    | 0,81        |
| ENSG00000137074 | APTX        | -2,67    | 0,80        |
| ENSG00000165338 | HECTD2      | -2,67    | 0,62        |
| ENSG00000137288 | UQCC2       | -2,67    | 0,62        |
| ENSG00000151692 | RNF144A     | -2,67    | 0,71        |
| ENSG00000178409 | BEND3       | -2,67    | 0,81        |
| ENSG00000171714 | ANO5        | -2,67    | 0,52        |
| ENSG00000119715 | ESRRB       | -2,66    | 0,76        |
| ENSG00000187736 | NHEJ1       | -2,66    | 0,71        |
| ENSG00000254245 | PCDHGA3     | -2,66    | 0,56        |
| ENSG00000160917 | CPSF4       | -2,66    | 0,74        |
| ENSG00000179776 | CDH5        | -2,66    | 0,85        |
| ENSG00000148840 | PPRC1       | -2,66    | 0,72        |
| ENSG00000175581 | MRPL48      | -2,66    | 0,66        |
| ENSG00000113811 | SELK        | -2,66    | 0,77        |
| ENSG00000154930 | ACSS1       | -2,66    | 0,67        |
| ENSG00000185532 | PRKG1       | -2,66    | 0,34        |
| ENSG00000113328 | CCNG1       | -2,66    | 0,75        |
| ENSG00000176953 | NFATC2IP    | -2,66    | 0,66        |
| ENSG00000065526 | SPEN        | -2,66    | 0,79        |
| ENSG00000178188 | SH2B1       | -2,66    | 0,84        |
| ENSG00000198723 | C19orf45    | -2,65    | 0,71        |
| ENSG00000173198 | CYSLTR1     | -2,65    | 0,53        |
| ENSG00000189050 | RNFT1       | -2,65    | 0,75        |
| ENSG00000142149 | HUNK        | -2,65    | 0,78        |
| ENSG00000130368 | MAS1        | -2,65    | 0,85        |
| ENSG00000189171 | S100A13     | -2,65    | 0,78        |
| ENSG00000138670 | RASGEF1B    | -2,65    | 0,84        |
| ENSG00000183709 | IFNL2       | -2,65    | 0,84        |
| ENSG00000087460 | GNAS        | -2,65    | 0,84        |



| ensembl gene    | gene symbol | Score(d) | Fold Change |
|-----------------|-------------|----------|-------------|
| ENSG00000160226 | C21orf2     | -2,65    | 0,81        |
| ENSG00000188153 | COL4A5      | -2,65    | 0,29        |
| ENSG00000155957 | TMBIM4      | -2,65    | 0,79        |
| ENSG00000139173 | TMEM117     | -2,64    | 0,75        |
| ENSG00000146674 | IGFBP3      | -2,64    | 0,62        |
| ENSG00000155749 | ALS2CR12    | -2,64    | 0,69        |
| ENSG00000168530 | MYL1        | -2,64    | 0,75        |
| ENSG00000181754 | AMIGO1      | -2,64    | 0,79        |
| ENSG00000150054 | MPP7        | -2,64    | 0,73        |
| ENSG00000197415 | VEPH1       | -2,64    | 0,49        |
| ENSG00000204304 | PBX2        | -2,64    | 0,82        |
| ENSG00000137501 | SYTL2       | -2,64    | 0,58        |
| ENSG00000114859 | CLCN2       | -2,64    | 0,83        |
| ENSG00000075151 | EIF4G3      | -2,64    | 0,72        |
| ENSG00000168135 | KCNJ4       | -2,64    | 0,86        |
| ENSG00000105516 | DBP         | -2,63    | 0,73        |
| ENSG00000164291 | ARSK        | -2,63    | 0,69        |
| ENSG00000130513 | GDF15       | -2,63    | 0,80        |
| ENSG00000112242 | E2F3        | -2,63    | 0,82        |
| ENSG00000129071 | MBD4        | -2,63    | 0,78        |
| ENSG00000170615 | SLC26A5     | -2,63    | 0,46        |
| ENSG00000135828 | RNASEL      | -2,63    | 0,67        |
| ENSG00000106609 | TMEM248     | -2,63    | 0,84        |
| ENSG00000239590 | OR1J4       | -2,63    | 0,60        |
| ENSG00000135473 | PAN2        | -2,62    | 0,72        |
| ENSG00000146094 | DOK3        | -2,62    | 0,78        |
| ENSG00000188554 | NBR1        | -2,62    | 0,76        |
| ENSG00000164830 | OXR1        | -2,62    | 0,77        |
| ENSG00000105793 | GTPBP10     | -2,62    | 0,72        |
| ENSG00000174579 | MSL2        | -2,62    | 0,78        |
| ENSG00000185404 | SP140L      | -2,62    | 0,76        |
| ENSG00000159899 | NPR2        | -2,62    | 0,80        |
| ENSG00000103485 | QPRT        | -2,62    | 0,58        |
| ENSG00000129636 | ITFG1       | -2,61    | 0,73        |
| ENSG00000129472 | RAB2B       | -2,61    | 0,75        |
| ENSG00000011454 | RABGAP1     | -2,61    | 0,75        |
| ENSG00000112343 | TRIM38      | -2,61    | 0,76        |
| ENSG00000119328 | FAM206A     | -2,61    | 0,67        |
| ENSG00000239887 | C1orf226    | -2,61    | 0,72        |
| ENSG00000176177 | ENTHD1      | -2,61    | 0,80        |
| ENSG00000148737 | TCF7L2      | -2,61    | 0,64        |
| ENSG00000188107 | EYS         | -2,61    | 0,80        |
| ENSG00000144455 | SUMF1       | -2,61    | 0,68        |
| ENSG00000141699 | FAM134C     | -2,61    | 0,79        |
| ENSG00000188086 | PRSS45      | -2,61    | 0,78        |
| ENSG00000136854 | STXBP1      | -2,61    | 0,63        |
| ENSG00000176533 | GNG7        | -2,61    | 0,70        |
| ENSG00000011485 | PPP5C       | -2,60    | 0,65        |
| ENSG00000163463 | KRTCAP2     | -2,60    | 0,70        |

| ensembl gene    | gene symbol   | Score(d) | Fold Change |
|-----------------|---------------|----------|-------------|
| ENSG00000134323 | MYCN          | -2,60    | 0,85        |
| ENSG00000104154 | SLC30A4       | -2,60    | 0,70        |
| ENSG00000130227 | XPO7          | -2,60    | 0,79        |
| ENSG00000250719 | RP11-322N21.2 | -2,60    | 0,81        |
| ENSG00000204965 | PCDHA5        | -2,60    | 0,86        |
| ENSG00000113742 | CPEB4         | -2,60    | 0,70        |
| ENSG00000110042 | DTX4          | -2,60    | 0,82        |
| ENSG00000100427 | MLC1          | -2,60    | 0,85        |
| ENSG00000251369 | ZNF550        | -2,59    | 0,75        |
| ENSG00000140416 | TPM1          | -2,59    | 0,65        |
| ENSG00000140474 | ULK3          | -2,59    | 0,67        |
| ENSG00000148218 | ALAD          | -2,59    | 0,85        |
| ENSG00000196358 | NTNG2         | -2,59    | 0,81        |
| ENSG00000183977 | PP2D1         | -2,59    | 0,81        |
| ENSG00000103089 | FA2H          | -2,59    | 0,56        |
| ENSG00000132953 | XPO4          | -2,58    | 0,74        |
| ENSG00000136731 | UGGT1         | -2,58    | 0,81        |
| ENSG00000182489 | XKRX          | -2,58    | 0,46        |
| ENSG00000130234 | ACE2          | -2,58    | 0,79        |
| ENSG00000204267 | TAP2          | -2,58    | 0,71        |
| ENSG00000168229 | PTGDR         | -2,58    | 0,52        |
| ENSG00000187486 | KCNJ11        | -2,58    | 0,80        |
| ENSG00000172232 | AZU1          | -2,58    | 0,78        |
| ENSG00000278845 | MRPL45        | -2,58    | 0,70        |
| ENSG00000196228 | SULT1C3       | -2,58    | 0,89        |
| ENSG00000078687 | TNRC6C        | -2,58    | 0,69        |
| ENSG00000132170 | PPARG         | -2,58    | 0,70        |
| ENSG00000111834 | RSPH4A        | -2,58    | 0,69        |
| ENSG00000107104 | KANK1         | -2,58    | 0,56        |
| ENSG00000184305 | CCSER1        | -2,58    | 0,48        |
| ENSG00000185608 | MRPL40        | -2,58    | 0,74        |
| ENSG00000125337 | KIF25         | -2,58    | 0,84        |
| ENSG00000135709 | KIAA0513      | -2,57    | 0,64        |
| ENSG00000159915 | ZNF233        | -2,57    | 0,62        |
| ENSG00000005801 | ZNF195        | -2,57    | 0,78        |
| ENSG00000166930 | MS4A5         | -2,57    | 0,84        |
| ENSG00000169047 | IRS1          | -2,57    | 0,62        |
| ENSG00000145916 | RMND5B        | -2,57    | 0,79        |
| ENSG00000093009 | CDC45         | -2,57    | 0,79        |
| ENSG00000156162 | DPY19L4       | -2,57    | 0,70        |
| ENSG00000133983 | COX16         | -2,57    | 0,78        |
| ENSG00000148248 | SURF4         | -2,56    | 0,84        |
| ENSG00000101363 | MANBAL        | -2,56    | 0,78        |
| ENSG00000168936 | TMEM129       | -2,56    | 0,84        |
| ENSG00000188396 | TCTEX1D4      | -2,56    | 0,88        |
| ENSG00000171643 | S100Z         | -2,56    | 0,55        |
| ENSG00000169519 | METTLL15      | -2,56    | 0,65        |
| ENSG00000076928 | ARHGEF1       | -2,56    | 0,74        |
| ENSG00000214686 | IQCF6         | -2,56    | 0,90        |

| ensembl gene    | gene symbol  | Score(d) | Fold Change |
|-----------------|--------------|----------|-------------|
| ENSG00000110448 | CD5          | -2,56    | 0,83        |
| ENSG00000164035 | EMCN         | -2,56    | 0,74        |
| ENSG00000104324 | CPQ          | -2,56    | 0,62        |
| ENSG00000175344 | CHRNA7       | -2,56    | 0,74        |
| ENSG00000151208 | DLG5         | -2,56    | 0,72        |
| ENSG00000155085 | AK9          | -2,56    | 0,69        |
| ENSG00000175826 | CTDNEP1      | -2,56    | 0,82        |
| ENSG00000068137 | PLEKHH3      | -2,55    | 0,72        |
| ENSG00000164258 | NDUFS4       | -2,55    | 0,67        |
| ENSG00000148798 | INA          | -2,55    | 0,70        |
| ENSG00000080200 | CRYBG3       | -2,55    | 0,61        |
| ENSG00000139546 | TARBP2       | -2,55    | 0,80        |
| ENSG00000138639 | ARHGAP24     | -2,55    | 0,67        |
| ENSG00000176720 | BOK          | -2,55    | 0,87        |
| ENSG00000211898 | IGHD         | -2,55    | 0,50        |
| ENSG00000113593 | PPWD1        | -2,55    | 0,82        |
| ENSG00000163220 | S100A9       | -2,55    | 0,54        |
| ENSG00000169902 | TPST1        | -2,55    | 0,63        |
| ENSG00000030419 | IKZF2        | -2,54    | 0,73        |
| ENSG00000167656 | LY6D         | -2,54    | 0,81        |
| ENSG00000124177 | CHD6         | -2,54    | 0,71        |
| ENSG00000106571 | GLI3         | -2,54    | 0,57        |
| ENSG00000188211 | NCR3LG1      | -2,54    | 0,60        |
| ENSG00000113300 | CNOT6        | -2,54    | 0,81        |
| ENSG00000150977 | RILPL2       | -2,54    | 0,69        |
| ENSG00000172086 | KRCC1        | -2,54    | 0,69        |
| ENSG00000118520 | ARG1         | -2,54    | 0,71        |
| ENSG00000137944 | KYAT3        | -2,54    | 0,74        |
| ENSG00000128567 | PODXL        | -2,54    | 0,79        |
| ENSG00000082213 | C5orf22      | -2,54    | 0,82        |
| ENSG00000136114 | THSD1        | -2,53    | 0,73        |
| ENSG00000123268 | ATF1         | -2,53    | 0,81        |
| ENSG00000157150 | TIMP4        | -2,53    | 0,87        |
| ENSG00000136895 | GARNL3       | -2,53    | 0,66        |
| ENSG00000113048 | MRPS27       | -2,53    | 0,71        |
| ENSG00000270024 | C8orf44-SGK3 | -2,53    | 0,57        |
| ENSG00000177042 | TMEM80       | -2,53    | 0,78        |
| ENSG00000126091 | ST3GAL3      | -2,52    | 0,77        |
| ENSG00000103091 | WDR59        | -2,52    | 0,80        |
| ENSG00000105677 | TMEM147      | -2,52    | 0,71        |
| ENSG00000164244 | PRRC1        | -2,52    | 0,83        |
| ENSG00000214128 | TMEM213      | -2,52    | 0,78        |
| ENSG00000137770 | CTDSPL2      | -2,52    | 0,77        |
| ENSG00000196781 | TLE1         | -2,52    | 0,49        |
| ENSG00000173715 | C11orf80     | -2,52    | 0,70        |
| ENSG00000112659 | CUL9         | -2,52    | 0,84        |
| ENSG00000154743 | TSEN2        | -2,52    | 0,71        |
| ENSG00000109861 | CTSC         | -2,52    | 0,59        |
| ENSG00000163430 | FSTL1        | -2,52    | 0,75        |

| ensembl gene    | gene symbol | Score(d) | Fold Change |
|-----------------|-------------|----------|-------------|
| ENSG00000149091 | DGKZ        | -2,52    | 0,79        |
| ENSG00000115756 | HPCAL1      | -2,52    | 0,70        |
| ENSG00000134824 | FADS2       | -2,52    | 0,68        |
| ENSG00000182670 | TTC3        | -2,52    | 0,78        |
| ENSG00000271303 | SRXN1       | -2,52    | 0,82        |
| ENSG00000184347 | SLIT3       | -2,52    | 0,82        |
| ENSG00000146802 | TMEM168     | -2,52    | 0,66        |
| ENSG00000124102 | PI3         | -2,52    | 0,84        |
| ENSG00000171121 | KCNMB3      | -2,52    | 0,71        |
| ENSG00000105011 | ASF1B       | -2,52    | 0,66        |
| ENSG00000108244 | KRT23       | -2,52    | 0,79        |
| ENSG00000128052 | KDR         | -2,51    | 0,80        |
| ENSG00000254656 | RTL1        | -2,51    | 0,86        |
| ENSG00000171067 | C11orf24    | -2,51    | 0,78        |
| ENSG00000105438 | KDELRL1     | -2,51    | 0,81        |
| ENSG00000221994 | ZNF630      | -2,51    | 0,70        |
| ENSG00000006831 | ADIPOR2     | -2,51    | 0,60        |
| ENSG00000130299 | GTPBP3      | -2,51    | 0,85        |
| ENSG00000139163 | ETNK1       | -2,51    | 0,75        |
| ENSG00000239839 | DEFA3       | -2,51    | 0,43        |
| ENSG00000223573 | TINCR       | -2,51    | 0,76        |
| ENSG00000110975 | SYT10       | -2,51    | 0,74        |
| ENSG00000187626 | ZKSCAN4     | -2,51    | 0,83        |
| ENSG00000158717 | RNF166      | -2,51    | 0,74        |
| ENSG00000164073 | MFSD8       | -2,50    | 0,77        |
| ENSG00000076351 | SLC46A1     | -2,50    | 0,76        |
| ENSG00000168101 | NUDT16L1    | -2,50    | 0,88        |
| ENSG00000136770 | DNAJC1      | -2,50    | 0,75        |
| ENSG00000165997 | ARL5B       | -2,50    | 0,77        |
| ENSG00000114923 | SLC4A3      | -2,50    | 0,80        |
| ENSG00000185518 | SV2B        | -2,50    | 0,87        |
| ENSG00000130032 | PRRG3       | -2,49    | 0,77        |
| ENSG00000163993 | S100P       | -2,49    | 0,70        |
| ENSG00000163687 | DNASE1L3    | -2,49    | 0,76        |
| ENSG00000076770 | MBNL3       | -2,49    | 0,61        |
| ENSG00000130734 | ATG4D       | -2,49    | 0,84        |
| ENSG00000028310 | BRD9        | -2,49    | 0,73        |
| ENSG00000169740 | ZNF32       | -2,49    | 0,74        |
| ENSG00000168916 | ZNF608      | -2,49    | 0,54        |
| ENSG00000101493 | ZNF516      | -2,49    | 0,76        |
| ENSG00000088970 | KIZ         | -2,49    | 0,78        |
| ENSG00000148346 | LCN2        | -2,49    | 0,69        |
| ENSG00000109927 | TECTA       | -2,49    | 0,64        |
| ENSG00000136874 | STX17       | -2,49    | 0,79        |
| ENSG00000084764 | MAPRE3      | -2,49    | 0,80        |
| ENSG00000169684 | CHRNA5      | -2,49    | 0,54        |
| ENSG00000142694 | EVA1B       | -2,49    | 0,77        |
| ENSG00000167700 | MFSD3       | -2,49    | 0,73        |
| ENSG00000130649 | CYP2E1      | -2,49    | 0,78        |

| ensembl gene    | gene symbol | Score(d) | Fold Change |
|-----------------|-------------|----------|-------------|
| ENSG00000169282 | KCNAB1      | -2,49    | 0,82        |
| ENSG00000144642 | RBMS3       | -2,49    | 0,55        |
| ENSG00000164465 | DCBLD1      | -2,48    | 0,68        |
| ENSG00000130812 | ANGPTL6     | -2,48    | 0,87        |
| ENSG00000168298 | HIST1H1E    | -2,48    | 0,74        |
| ENSG00000197044 | ZNF441      | -2,48    | 0,83        |
| ENSG00000159239 | C2orf81     | -2,48    | 0,85        |
| ENSG00000090581 | GNPTG       | -2,48    | 0,69        |
| ENSG00000268182 | SMIM17      | -2,48    | 0,87        |
| ENSG00000119699 | TGFB3       | -2,47    | 0,81        |
| ENSG00000166716 | ZNF592      | -2,47    | 0,78        |
| ENSG00000186510 | CLCNKA      | -2,47    | 0,69        |
| ENSG00000137103 | TMEM8B      | -2,47    | 0,81        |
| ENSG00000157741 | UBN2        | -2,47    | 0,74        |
| ENSG00000237489 | LINC00959   | -2,47    | 0,81        |
| ENSG00000196557 | CACNA1H     | -2,47    | 0,79        |
| ENSG00000204628 | RACK1       | -2,47    | 0,87        |
| ENSG00000171634 | BPTF        | -2,47    | 0,79        |
| ENSG0000013561  | RNF14       | -2,47    | 0,72        |
| ENSG00000155100 | OTUD6B      | -2,47    | 0,75        |
| ENSG00000162736 | NCSTN       | -2,47    | 0,79        |
| ENSG00000136383 | ALPK3       | -2,46    | 0,62        |
| ENSG00000059588 | TARBP1      | -2,46    | 0,65        |
| ENSG00000172497 | ACOT12      | -2,46    | 0,73        |
| ENSG00000064012 | CASP8       | -2,46    | 0,68        |
| ENSG00000198690 | FAN1        | -2,46    | 0,79        |
| ENSG00000151893 | CACUL1      | -2,46    | 0,77        |
| ENSG00000161955 | TNFSF13     | -2,46    | 0,47        |
| ENSG00000183474 | GTF2H2C     | -2,46    | 0,70        |
| ENSG00000127720 | METTL25     | -2,46    | 0,72        |
| ENSG00000165138 | ANKS6       | -2,46    | 0,75        |
| ENSG00000232070 | TMEM253     | -2,46    | 0,89        |
| ENSG00000146276 | GABRR1      | -2,46    | 0,79        |
| ENSG00000203780 | FANK1       | -2,46    | 0,85        |
| ENSG00000105369 | CD79A       | -2,46    | 0,39        |
| ENSG00000174500 | GCSAM       | -2,46    | 0,42        |
| ENSG00000104140 | RHOV        | -2,46    | 0,88        |
| ENSG00000198336 | MYL4        | -2,46    | 0,83        |
| ENSG00000155893 | PXYLP1      | -2,45    | 0,73        |
| ENSG00000135999 | EPC2        | -2,45    | 0,76        |
| ENSG00000187961 | KLHL17      | -2,45    | 0,87        |
| ENSG00000169031 | COL4A3      | -2,45    | 0,67        |
| ENSG00000111816 | FRK         | -2,45    | 0,56        |
| ENSG00000087095 | NLK         | -2,45    | 0,70        |
| ENSG00000165325 | CCDC67      | -2,45    | 0,86        |
| ENSG00000135097 | MSI1        | -2,45    | 0,86        |
| ENSG00000165632 | TAF3        | -2,45    | 0,84        |
| ENSG00000144857 | BOC         | -2,45    | 0,53        |
| ENSG00000189058 | APOD        | -2,45    | 0,61        |

| ensembl gene    | gene symbol | Score(d) | Fold Change |
|-----------------|-------------|----------|-------------|
| ENSG00000183662 | FAM19A1     | -2,45    | 0,82        |
| ENSG00000127588 | GNG13       | -2,45    | 0,89        |
| ENSG00000115825 | PRKD3       | -2,45    | 0,46        |
| ENSG00000135413 | LACRT       | -2,45    | 0,89        |
| ENSG00000151650 | VENTX       | -2,45    | 0,86        |
| ENSG00000063176 | SPHK2       | -2,45    | 0,85        |
| ENSG00000253873 | PCDHGA11    | -2,45    | 0,66        |
| ENSG00000176472 | ZNF575      | -2,44    | 0,83        |
| ENSG00000213694 | S1PR3       | -2,44    | 0,78        |
| ENSG00000177200 | CHD9        | -2,44    | 0,74        |
| ENSG00000121314 | TAS2R8      | -2,44    | 0,80        |
| ENSG00000146576 | C7orf26     | -2,44    | 0,79        |
| ENSG00000177302 | TOP3A       | -2,44    | 0,80        |
| ENSG00000152291 | TGOLN2      | -2,44    | 0,84        |
| ENSG00000149929 | HIRIP3      | -2,44    | 0,82        |
| ENSG00000182985 | CADM1       | -2,44    | 0,30        |
| ENSG00000146966 | DENND2A     | -2,44    | 0,85        |
| ENSG00000173376 | NDNF        | -2,43    | 0,49        |
| ENSG00000173757 | STAT5B      | -2,43    | 0,63        |
| ENSG00000105443 | CYTH2       | -2,43    | 0,79        |
| ENSG00000226174 | TEX22       | -2,43    | 0,85        |
| ENSG00000102837 | OLFM4       | -2,43    | 0,48        |
| ENSG00000138073 | PREB        | -2,43    | 0,68        |
| ENSG00000178761 | FAM219B     | -2,43    | 0,78        |
| ENSG00000136247 | ZDHHC4      | -2,43    | 0,85        |
| ENSG00000166839 | ANKDD1A     | -2,43    | 0,82        |
| ENSG00000159753 | CARMIL2     | -2,43    | 0,75        |
| ENSG00000040341 | STAU2       | -2,43    | 0,79        |
| ENSG00000119977 | TCTN3       | -2,42    | 0,74        |
| ENSG00000175063 | UBE2C       | -2,42    | 0,79        |
| ENSG00000241360 | PDXP        | -2,42    | 0,85        |
| ENSG00000144868 | TMEM108     | -2,42    | 0,52        |
| ENSG00000166352 | C11orf74    | -2,42    | 0,63        |
| ENSG00000158077 | NLRP14      | -2,42    | 0,61        |
| ENSG00000272617 | COG8        | -2,42    | 0,69        |
| ENSG00000106333 | PCOLCE      | -2,42    | 0,71        |
| ENSG00000128654 | MTX2        | -2,42    | 0,78        |
| ENSG00000107562 | CXCL12      | -2,42    | 0,43        |
| ENSG00000103994 | ZNF106      | -2,42    | 0,68        |
| ENSG00000110492 | MDK         | -2,42    | 0,53        |
| ENSG00000164086 | DUSP7       | -2,42    | 0,71        |
| ENSG00000103313 | MEFV        | -2,42    | 0,78        |
| ENSG00000140943 | MBTPS1      | -2,41    | 0,78        |
| ENSG00000074181 | NOTCH3      | -2,41    | 0,89        |
| ENSG00000127311 | HELB        | -2,41    | 0,68        |
| ENSG00000184992 | BRI3BP      | -2,41    | 0,79        |
| ENSG00000256771 | ZNF253      | -2,41    | 0,71        |
| ENSG00000047346 | FAM214A     | -2,41    | 0,73        |
| ENSG00000198121 | LPAR1       | -2,41    | 0,62        |

| ensembl gene    | gene symbol | Score(d) | Fold Change |
|-----------------|-------------|----------|-------------|
| ENSG00000153291 | SLC25A27    | -2,41    | 0,48        |
| ENSG00000108231 | LGI1        | -2,41    | 0,88        |
| ENSG00000162373 | BEND5       | -2,41    | 0,75        |
| ENSG00000182551 | ADI1        | -2,41    | 0,78        |
| ENSG00000166263 | STXBP4      | -2,41    | 0,68        |
| ENSG00000149403 | GRIK4       | -2,40    | 0,55        |
| ENSG00000173409 | ARV1        | -2,40    | 0,74        |
| ENSG00000136197 | C7orf25     | -2,40    | 0,66        |
| ENSG00000176732 | PFN4        | -2,40    | 0,83        |
| ENSG00000167968 | DNASE1L2    | -2,40    | 0,88        |
| ENSG00000072818 | ACAP1       | -2,40    | 0,65        |
| ENSG00000129194 | SOX15       | -2,40    | 0,86        |
| ENSG00000181817 | LSM10       | -2,40    | 0,79        |
| ENSG00000126804 | ZBTB1       | -2,40    | 0,85        |
| ENSG00000130479 | MAP1S       | -2,40    | 0,81        |
| ENSG00000143458 | GABPB2      | -2,40    | 0,69        |
| ENSG00000197165 | SULT1A2     | -2,40    | 0,82        |
| ENSG00000141556 | TBCD        | -2,39    | 0,77        |
| ENSG00000125844 | RRBP1       | -2,39    | 0,68        |
| ENSG00000136237 | RAPGEF5     | -2,39    | 0,47        |
| ENSG00000113194 | FAF2        | -2,39    | 0,82        |
| ENSG00000188735 | TMEM120B    | -2,39    | 0,80        |
| ENSG00000110719 | TCIRG1      | -2,39    | 0,76        |
| ENSG00000171703 | TCEA2       | -2,39    | 0,77        |
| ENSG00000177380 | PPFIA3      | -2,39    | 0,75        |
| ENSG00000164880 | INTS1       | -2,39    | 0,79        |
| ENSG00000149177 | PTPRJ       | -2,39    | 0,58        |
| ENSG00000172116 | CD8B        | -2,39    | 0,74        |
| ENSG00000089692 | LAG3        | -2,39    | 0,81        |
| ENSG00000197706 | OR6C74      | -2,39    | 0,86        |
| ENSG00000144028 | SNRNP200    | -2,39    | 0,85        |
| ENSG00000164754 | RAD21       | -2,39    | 0,84        |
| ENSG00000080166 | DCT         | -2,39    | 0,72        |
| ENSG00000223609 | HBD         | -2,38    | 0,69        |
| ENSG00000181991 | MRPS11      | -2,38    | 0,73        |
| ENSG00000160963 | COL26A1     | -2,38    | 0,90        |
| ENSG00000100711 | ZFYVE21     | -2,38    | 0,78        |
| ENSG00000065427 | KARS        | -2,38    | 0,79        |
| ENSG00000007129 | CEACAM21    | -2,38    | 0,76        |
| ENSG00000138079 | SLC3A1      | -2,38    | 0,79        |
| ENSG00000063046 | EIF4B       | -2,38    | 0,82        |
| ENSG00000184012 | TMPRSS2     | -2,38    | 0,75        |
| ENSG00000197062 | ZSCAN26     | -2,38    | 0,78        |
| ENSG00000106638 | TBL2        | -2,38    | 0,81        |
| ENSG00000186591 | UBE2H       | -2,38    | 0,80        |
| ENSG00000170745 | KCNS3       | -2,38    | 0,51        |
| ENSG00000176641 | RNF152      | -2,38    | 0,85        |
| ENSG00000058866 | DGKG        | -2,38    | 0,66        |
| ENSG00000150681 | RGS18       | -2,38    | 0,64        |

| ensembl gene    | gene symbol | Score(d) | Fold Change |
|-----------------|-------------|----------|-------------|
| ENSG00000105287 | PRKD2       | -2,38    | 0,68        |
| ENSG00000144468 | RHBDD1      | -2,38    | 0,75        |
| ENSG00000089199 | CHGB        | -2,38    | 0,81        |
| ENSG00000138768 | USO1        | -2,37    | 0,78        |
| ENSG00000145723 | GIN1        | -2,37    | 0,62        |
| ENSG00000164694 | FNDC1       | -2,37    | 0,76        |
| ENSG00000134152 | KATNBL1     | -2,37    | 0,57        |
| ENSG00000118418 | HMGN3       | -2,37    | 0,80        |
| ENSG00000230778 | ANKRD63     | -2,37    | 0,88        |
| ENSG00000135299 | ANKRD6      | -2,37    | 0,69        |
| ENSG00000070269 | TMEM260     | -2,37    | 0,76        |
| ENSG00000124602 | UNC5CL      | -2,37    | 0,87        |
| ENSG00000152443 | ZNF776      | -2,37    | 0,76        |
| ENSG00000184786 | TCTE3       | -2,37    | 0,74        |
| ENSG00000135046 | ANXA1       | -2,37    | 0,39        |
| ENSG00000166987 | MBD6        | -2,36    | 0,77        |
| ENSG00000138613 | APH1B       | -2,36    | 0,66        |
| ENSG00000124772 | CPNE5       | -2,36    | 0,64        |
| ENSG00000175283 | DOLK        | -2,36    | 0,80        |
| ENSG00000215545 | DEFB116     | -2,36    | 0,87        |
| ENSG00000099377 | HSD3B7      | -2,36    | 0,86        |
| ENSG00000134061 | CD180       | -2,36    | 0,48        |
| ENSG00000161921 | CXCL16      | -2,36    | 0,61        |
| ENSG00000082074 | FYB         | -2,36    | 0,61        |
| ENSG00000107554 | DNMBP       | -2,36    | 0,65        |
| ENSG00000253305 | PCDHGB6     | -2,36    | 0,61        |
| ENSG00000143512 | HHIPL2      | -2,36    | 0,83        |
| ENSG00000174547 | MRPL11      | -2,36    | 0,76        |
| ENSG00000111536 | IL26        | -2,36    | 0,78        |
| ENSG00000104093 | DMXL2       | -2,36    | 0,55        |
| ENSG00000182700 | IGIP        | -2,36    | 0,79        |
| ENSG00000187118 | CMC1        | -2,35    | 0,76        |
| ENSG00000163536 | SERPINI1    | -2,35    | 0,48        |
| ENSG00000101624 | CEP76       | -2,35    | 0,76        |
| ENSG00000172987 | HPSE2       | -2,35    | 0,87        |
| ENSG00000170291 | ELP5        | -2,35    | 0,79        |
| ENSG00000044090 | CUL7        | -2,35    | 0,82        |
| ENSG00000110074 | FOXRED1     | -2,35    | 0,80        |
| ENSG00000187123 | LYPD6       | -2,35    | 0,87        |
| ENSG00000135362 | PRR5L       | -2,35    | 0,80        |
| ENSG00000135637 | CCDC142     | -2,35    | 0,79        |
| ENSG00000198128 | OR2L3       | -2,35    | 0,85        |
| ENSG00000170545 | SMAGP       | -2,35    | 0,60        |
| ENSG00000126561 | STAT5A      | -2,35    | 0,60        |
| ENSG00000128272 | ATF4        | -2,35    | 0,87        |
| ENSG00000076067 | RBMS2       | -2,35    | 0,73        |
| ENSG00000169435 | RASSF6      | -2,35    | 0,54        |
| ENSG00000139133 | ALG10       | -2,35    | 0,71        |
| ENSG00000262576 | PCDHGA4     | -2,34    | 0,71        |



| ensembl gene    | gene symbol  | Score(d) | Fold Change |
|-----------------|--------------|----------|-------------|
| ENSG00000169641 | LUZP1        | -2,34    | 0,72        |
| ENSG00000178690 | DYNAP        | -2,34    | 0,85        |
| ENSG00000134917 | ADAMTS8      | -2,34    | 0,82        |
| ENSG00000154589 | LY96         | -2,34    | 0,61        |
| ENSG00000154642 | C21orf91     | -2,34    | 0,72        |
| ENSG00000145284 | SCD5         | -2,34    | 0,66        |
| ENSG00000152683 | SLC30A6      | -2,34    | 0,77        |
| ENSG00000178878 | APOLD1       | -2,34    | 0,82        |
| ENSG00000117461 | PIK3R3       | -2,34    | 0,62        |
| ENSG00000103569 | AQP9         | -2,34    | 0,57        |
| ENSG00000112378 | PERP         | -2,34    | 0,68        |
| ENSG00000160877 | NACC1        | -2,34    | 0,80        |
| ENSG00000158458 | NRG2         | -2,34    | 0,71        |
| ENSG00000120328 | PCDHB12      | -2,34    | 0,69        |
| ENSG00000145700 | ANKRD31      | -2,33    | 0,68        |
| ENSG00000183049 | CAMK1D       | -2,33    | 0,62        |
| ENSG00000101126 | ADNP         | -2,33    | 0,85        |
| ENSG00000215790 | SLC35E2      | -2,33    | 0,73        |
| ENSG00000189362 | NEMP2        | -2,33    | 0,74        |
| ENSG00000156009 | MAGEA8       | -2,33    | 0,87        |
| ENSG00000249242 | TMEM150C     | -2,33    | 0,80        |
| ENSG00000181035 | SLC25A42     | -2,33    | 0,74        |
| ENSG00000171853 | TRAPPC12     | -2,33    | 0,72        |
| ENSG00000114745 | GORASP1      | -2,33    | 0,78        |
| ENSG00000214891 | TRIM64C      | -2,33    | 0,83        |
| ENSG00000186409 | CCDC30       | -2,33    | 0,79        |
| ENSG00000171236 | LRG1         | -2,33    | 0,75        |
| ENSG00000154309 | DISP1        | -2,33    | 0,74        |
| ENSG00000167642 | SPINT2       | -2,33    | 0,49        |
| ENSG00000138193 | PLCE1        | -2,33    | 0,91        |
| ENSG00000112419 | PHACTR2      | -2,33    | 0,59        |
| ENSG00000118518 | RNF146       | -2,33    | 0,78        |
| ENSG00000026950 | BTN3A1       | -2,32    | 0,66        |
| ENSG00000197363 | ZNF517       | -2,32    | 0,86        |
| ENSG00000171444 | MCC          | -2,32    | 0,63        |
| ENSG00000153162 | BMP6         | -2,32    | 0,67        |
| ENSG00000100084 | HIRA         | -2,32    | 0,67        |
| ENSG00000213760 | ATP6V1G2     | -2,32    | 0,82        |
| ENSG00000127074 | RGS13        | -2,32    | 0,31        |
| ENSG00000140961 | OSGIN1       | -2,32    | 0,86        |
| ENSG00000125449 | ARMC7        | -2,32    | 0,81        |
| ENSG00000267561 | RP5-1052I5.2 | -2,32    | 0,71        |
| ENSG00000182481 | KPNA2        | -2,32    | 0,75        |
| ENSG00000107829 | FBXW4        | -2,32    | 0,76        |
| ENSG00000141965 | FEM1A        | -2,32    | 0,80        |
| ENSG00000117472 | TSPAN1       | -2,32    | 0,74        |
| ENSG00000041353 | RAB27B       | -2,32    | 0,74        |
| ENSG00000088766 | CRLS1        | -2,32    | 0,75        |
| ENSG00000163882 | POLR2H       | -2,32    | 0,72        |

| ensembl gene    | gene symbol | Score(d) | Fold Change |
|-----------------|-------------|----------|-------------|
| ENSG00000179388 | EGR3        | -2,32    | 0,74        |
| ENSG00000050438 | SLC4A8      | -2,32    | 0,82        |
| ENSG00000135480 | KRT7        | -2,31    | 0,74        |
| ENSG00000167081 | PBX3        | -2,31    | 0,71        |
| ENSG00000131089 | ARHGEF9     | -2,31    | 0,77        |
| ENSG00000122705 | CLTA        | -2,31    | 0,78        |
| ENSG00000162227 | TAF6L       | -2,31    | 0,79        |
| ENSG00000169570 | DTWD2       | -2,31    | 0,78        |
| ENSG00000264364 | DYNLL2      | -2,31    | 0,78        |
| ENSG00000121068 | TBX2        | -2,31    | 0,85        |
| ENSG00000132466 | ANKRD17     | -2,31    | 0,84        |
| ENSG00000162980 | ARL5A       | -2,31    | 0,71        |
| ENSG00000274750 | HIST1H3E    | -2,31    | 0,56        |
| ENSG00000139826 | ABHD13      | -2,31    | 0,80        |
| ENSG00000164080 | RAD54L2     | -2,31    | 0,85        |
| ENSG00000165186 | PTCHD1      | -2,31    | 0,81        |
| ENSG00000186431 | FCAR        | -2,31    | 0,65        |
| ENSG00000153790 | C7orf31     | -2,31    | 0,77        |
| ENSG00000172199 | OR8U1       | -2,31    | 0,87        |
| ENSG00000140398 | NEIL1       | -2,30    | 0,60        |
| ENSG00000182896 | TMEM95      | -2,30    | 0,89        |
| ENSG00000163121 | NEURL3      | -2,30    | 0,90        |
| ENSG00000186812 | ZNF397      | -2,30    | 0,75        |
| ENSG00000181458 | TMEM45A     | -2,30    | 0,70        |
| ENSG00000174928 | C3orf33     | -2,30    | 0,82        |
| ENSG00000198088 | NUP62CL     | -2,30    | 0,70        |
| ENSG00000172345 | STARD5      | -2,30    | 0,66        |
| ENSG00000186496 | ZNF396      | -2,30    | 0,84        |
| ENSG00000163539 | CLASP2      | -2,30    | 0,79        |
| ENSG00000119408 | NEK6        | -2,30    | 0,52        |
| ENSG00000006025 | OSBPL7      | -2,30    | 0,85        |
| ENSG00000166452 | AKIP1       | -2,30    | 0,75        |
| ENSG00000165699 | TSC1        | -2,30    | 0,85        |
| ENSG00000169760 | NLGN1       | -2,30    | 0,70        |
| ENSG00000258405 | ZNF578      | -2,30    | 0,81        |
| ENSG00000172201 | ID4         | -2,30    | 0,85        |
| ENSG00000075420 | FNDC3B      | -2,29    | 0,77        |
| ENSG00000106785 | TRIM14      | -2,29    | 0,87        |
| ENSG00000155974 | GRIP1       | -2,29    | 0,50        |
| ENSG00000121897 | LIAS        | -2,29    | 0,74        |
| ENSG00000122778 | KIAA1549    | -2,29    | 0,67        |
| ENSG00000108984 | MAP2K6      | -2,29    | 0,60        |
| ENSG00000063245 | EPN1        | -2,29    | 0,83        |
| ENSG00000179023 | KLHDC7A     | -2,29    | 0,88        |
| ENSG00000144840 | RABL3       | -2,29    | 0,77        |
| ENSG00000135547 | HEY2        | -2,29    | 0,49        |
| ENSG00000033800 | PIAS1       | -2,29    | 0,81        |
| ENSG00000170234 | PWWP2A      | -2,29    | 0,83        |
| ENSG00000115556 | PLCD4       | -2,29    | 0,72        |

| ensembl gene    | gene symbol   | Score(d) | Fold Change |
|-----------------|---------------|----------|-------------|
| ENSG00000270011 | ZNF559-ZNF177 | -2,29    | 0,61        |
| ENSG00000273749 | CYFIP1        | -2,29    | 0,69        |
| ENSG00000114735 | HEMK1         | -2,29    | 0,85        |
| ENSG00000122986 | HVCN1         | -2,29    | 0,66        |
| ENSG00000169857 | AVEN          | -2,29    | 0,75        |
| ENSG00000158773 | USF1          | -2,28    | 0,71        |
| ENSG00000043143 | JADE2         | -2,28    | 0,73        |
| ENSG00000120913 | PDLIM2        | -2,28    | 0,78        |
| ENSG00000187650 | VMAC          | -2,28    | 0,81        |
| ENSG00000166794 | PPIB          | -2,28    | 0,91        |
| ENSG00000147082 | CCNB3         | -2,28    | 0,69        |
| ENSG00000182685 | BRICD5        | -2,28    | 0,89        |
| ENSG00000111291 | GPRC5D        | -2,28    | 0,56        |
| ENSG00000174059 | CD34          | -2,28    | 0,84        |
| ENSG00000129151 | BBOX1         | -2,27    | 0,53        |
| ENSG00000144357 | UBR3          | -2,27    | 0,82        |
| ENSG00000244005 | NFS1          | -2,27    | 0,70        |
| ENSG00000143006 | DMRTB1        | -2,27    | 0,82        |
| ENSG00000188573 | FBLL1         | -2,27    | 0,89        |
| ENSG00000166181 | API5          | -2,27    | 0,84        |
| ENSG00000204257 | HLA-DMA       | -2,27    | 0,60        |
| ENSG00000089597 | GANAB         | -2,27    | 0,84        |
| ENSG00000204572 | KRTAP5-10     | -2,27    | 0,87        |
| ENSG00000136521 | NDUFB5        | -2,27    | 0,67        |
| ENSG00000269858 | EGLN2         | -2,26    | 0,66        |
| ENSG00000095059 | DHPS          | -2,26    | 0,72        |
| ENSG00000112658 | SRF           | -2,26    | 0,78        |
| ENSG00000113319 | RASGRF2       | -2,26    | 0,89        |
| ENSG00000158079 | PTPDC1        | -2,26    | 0,74        |
| ENSG00000185880 | TRIM69        | -2,26    | 0,56        |
| ENSG00000167380 | ZNF226        | -2,26    | 0,74        |
| ENSG00000197912 | SPG7          | -2,26    | 0,81        |
| ENSG00000183631 | PRR32         | -2,26    | 0,89        |
| ENSG00000215612 | HMX1          | -2,26    | 0,90        |
| ENSG00000083828 | ZNF586        | -2,26    | 0,79        |
| ENSG00000064607 | SUGP2         | -2,26    | 0,82        |
| ENSG00000125304 | TM9SF2        | -2,26    | 0,81        |
| ENSG00000166927 | MS4A7         | -2,26    | 0,64        |
| ENSG00000185775 | SPATA31A6     | -2,26    | 0,89        |
| ENSG00000152767 | FARP1         | -2,26    | 0,60        |
| ENSG00000051620 | HEBP2         | -2,26    | 0,77        |
| ENSG00000055118 | KCNH2         | -2,26    | 0,67        |
| ENSG00000203710 | CR1           | -2,26    | 0,65        |
| ENSG00000167535 | CACNB3        | -2,26    | 0,74        |
| ENSG00000113070 | HBEGF         | -2,25    | 0,69        |
| ENSG00000168036 | CTNNB1        | -2,25    | 0,76        |
| ENSG00000198018 | ENTPD7        | -2,25    | 0,77        |
| ENSG00000197798 | FAM118B       | -2,25    | 0,69        |
| ENSG00000176444 | CLK2          | -2,25    | 0,76        |

| ensembl gene    | gene symbol | Score(d) | Fold Change |
|-----------------|-------------|----------|-------------|
| ENSG00000107566 | ERLIN1      | -2,25    | 0,76        |
| ENSG00000161813 | LARP4       | -2,25    | 0,82        |
| ENSG00000243364 | EFNA4       | -2,25    | 0,72        |
| ENSG00000096070 | BRPF3       | -2,25    | 0,82        |
| ENSG00000214562 | NUTM2D      | -2,25    | 0,80        |
| ENSG00000078699 | CBFA2T2     | -2,25    | 0,72        |
| ENSG00000106348 | IMPDH1      | -2,25    | 0,84        |
| ENSG00000179002 | TAS1R2      | -2,25    | 0,82        |
| ENSG00000090382 | LYZ         | -2,25    | 0,55        |
| ENSG00000177984 | LCN15       | -2,25    | 0,88        |
| ENSG00000164068 | RNF123      | -2,25    | 0,78        |
| ENSG00000186265 | BTLA        | -2,25    | 0,70        |
| ENSG00000189114 | BLOC1S3     | -2,25    | 0,86        |
| ENSG00000072952 | MRVI1       | -2,25    | 0,88        |
| ENSG00000111275 | ALDH2       | -2,25    | 0,74        |
| ENSG00000162004 | CCDC78      | -2,24    | 0,80        |
| ENSG00000167220 | HDHD2       | -2,24    | 0,71        |
| ENSG00000159079 | C21orf59    | -2,24    | 0,81        |
| ENSG00000182798 | MAGEB17     | -2,24    | 0,87        |
| ENSG00000172209 | GPR22       | -2,24    | 0,86        |
| ENSG00000132704 | FCRL2       | -2,24    | 0,51        |
| ENSG00000187954 | CYHR1       | -2,24    | 0,89        |
| ENSG00000243264 | IGKV2D-29   | -2,24    | 0,58        |
| ENSG00000135469 | COQ10A      | -2,24    | 0,70        |
| ENSG00000165730 | STOX1       | -2,24    | 0,69        |
| ENSG00000172927 | MYEOV       | -2,24    | 0,60        |
| ENSG00000198841 | KTI12       | -2,24    | 0,78        |
| ENSG00000196345 | ZKSCAN7     | -2,24    | 0,71        |
| ENSG00000006282 | SPATA20     | -2,23    | 0,79        |
| ENSG00000060237 | WNK1        | -2,23    | 0,73        |
| ENSG00000258227 | CLEC5A      | -2,23    | 0,82        |
| ENSG00000089335 | ZNF302      | -2,23    | 0,83        |
| ENSG00000137393 | RNF144B     | -2,23    | 0,56        |
| ENSG00000140391 | TSPAN3      | -2,23    | 0,81        |
| ENSG00000081853 | PCDHGA2     | -2,23    | 0,72        |
| ENSG00000139651 | ZNF740      | -2,23    | 0,78        |
| ENSG00000119508 | NR4A3       | -2,23    | 0,58        |
| ENSG00000197381 | ADARB1      | -2,23    | 0,68        |
| ENSG00000189339 | SLC35E2B    | -2,23    | 0,73        |
| ENSG00000196427 | NBPF4       | -2,23    | 0,73        |
| ENSG00000123836 | PFKFB2      | -2,23    | 0,66        |
| ENSG00000007866 | TEAD3       | -2,23    | 0,82        |
| ENSG00000204414 | CSHL1       | -2,23    | 0,88        |
| ENSG00000175928 | LRRN1       | -2,23    | 0,71        |
| ENSG00000151135 | TMEM263     | -2,23    | 0,76        |
| ENSG00000039600 | SOX30       | -2,23    | 0,82        |
| ENSG00000138336 | TET1        | -2,22    | 0,65        |
| ENSG00000086548 | CEACAM6     | -2,22    | 0,61        |
| ENSG00000181690 | PLAG1       | -2,22    | 0,41        |

| ensembl gene    | gene symbol | Score(d) | Fold Change |
|-----------------|-------------|----------|-------------|
| ENSG00000092009 | CMA1        | -2,22    | 0,91        |
| ENSG00000180855 | ZNF443      | -2,22    | 0,72        |
| ENSG00000108691 | CCL2        | -2,22    | 0,41        |
| ENSG00000137040 | RANBP6      | -2,22    | 0,76        |
| ENSG00000129968 | ABHD17A     | -2,22    | 0,85        |
| ENSG00000198298 | ZNF485      | -2,22    | 0,86        |
| ENSG00000154553 | PDLIM3      | -2,22    | 0,53        |
| ENSG00000182871 | COL18A1     | -2,22    | 0,76        |
| ENSG00000150556 | LYPD6B      | -2,21    | 0,57        |
| ENSG00000196834 | POTEI       | -2,21    | 0,78        |
| ENSG00000119638 | NEK9        | -2,21    | 0,80        |
| ENSG00000205038 | PKHD1L1     | -2,21    | 0,65        |
| ENSG00000239704 | CDRT4       | -2,21    | 0,64        |
| ENSG00000134574 | DDB2        | -2,21    | 0,75        |
| ENSG00000095066 | HOOK2       | -2,21    | 0,72        |
| ENSG00000138430 | OLA1        | -2,21    | 0,79        |
| ENSG00000111863 | ADTRP       | -2,21    | 0,53        |
| ENSG00000169908 | TM4SF1      | -2,21    | 0,73        |
| ENSG00000149428 | HYOU1       | -2,21    | 0,84        |
| ENSG00000123901 | GPR83       | -2,21    | 0,86        |
| ENSG00000129009 | ISLR        | -2,21    | 0,47        |
| ENSG00000134452 | FBXO18      | -2,21    | 0,76        |
| ENSG00000125245 | GPR18       | -2,20    | 0,84        |
| ENSG00000157423 | HYDIN       | -2,20    | 0,70        |
| ENSG00000172663 | TMEM134     | -2,20    | 0,85        |
| ENSG00000157343 | ARMC12      | -2,20    | 0,82        |
| ENSG00000130300 | PLVAP       | -2,20    | 0,85        |
| ENSG00000166262 | FAM227B     | -2,20    | 0,73        |
| ENSG00000184761 | AC013269.5  | -2,20    | 0,84        |
| ENSG00000151304 | SRFBP1      | -2,20    | 0,77        |
| ENSG00000103222 | ABCC1       | -2,20    | 0,70        |
| ENSG00000276966 | HIST1H4E    | -2,20    | 0,55        |
| ENSG00000169764 | UGP2        | -2,20    | 0,79        |
| ENSG00000165682 | CLEC1B      | -2,20    | 0,79        |
| ENSG00000157637 | SLC38A10    | -2,20    | 0,78        |
| ENSG00000101307 | SIRPB1      | -2,20    | 0,61        |
| ENSG00000152455 | SUV39H2     | -2,20    | 0,71        |
| ENSG00000158445 | KCNB1       | -2,20    | 0,86        |
| ENSG00000100504 | PYGL        | -2,20    | 0,64        |
| ENSG00000106304 | SPAM1       | -2,19    | 0,90        |
| ENSG00000137502 | RAB30       | -2,19    | 0,70        |
| ENSG00000100678 | SLC8A3      | -2,19    | 0,66        |
| ENSG00000175048 | ZDHHC14     | -2,19    | 0,58        |
| ENSG00000131724 | IL13RA1     | -2,19    | 0,58        |
| ENSG00000253953 | PCDHGB4     | -2,19    | 0,68        |
| ENSG00000102383 | ZDHHC15     | -2,19    | 0,56        |
| ENSG00000121381 | TAS2R9      | -2,19    | 0,70        |
| ENSG00000170325 | PRDM10      | -2,19    | 0,83        |
| ENSG00000009709 | PAX7        | -2,19    | 0,88        |

| ensembl gene    | gene symbol | Score(d) | Fold Change |
|-----------------|-------------|----------|-------------|
| ENSG00000011465 | DCN         | -2,18    | 0,83        |
| ENSG00000060642 | PIGV        | -2,18    | 0,77        |
| ENSG00000086598 | TMED2       | -2,18    | 0,85        |
| ENSG00000168802 | CHTF8       | -2,18    | 0,84        |
| ENSG00000205078 | SYCE1L      | -2,18    | 0,82        |
| ENSG00000226887 | ERVMER34-1  | -2,18    | 0,76        |
| ENSG00000154380 | ENAH        | -2,18    | 0,57        |
| ENSG00000166803 | KIAA0101    | -2,18    | 0,75        |
| ENSG00000198283 | OR5B21      | -2,18    | 0,72        |
| ENSG00000020426 | MNAT1       | -2,18    | 0,76        |
| ENSG00000163202 | LCE3D       | -2,18    | 0,87        |
| ENSG00000119812 | FAM98A      | -2,18    | 0,78        |
| ENSG00000070761 | CFAP20      | -2,18    | 0,78        |
| ENSG00000159461 | AMFR        | -2,18    | 0,77        |
| ENSG00000198131 | ZNF544      | -2,18    | 0,58        |
| ENSG00000183044 | ABAT        | -2,17    | 0,82        |
| ENSG00000175040 | CHST2       | -2,17    | 0,61        |
| ENSG00000121481 | RNF2        | -2,17    | 0,74        |
| ENSG00000130158 | DOCK6       | -2,17    | 0,80        |
| ENSG00000162086 | ZNF75A      | -2,17    | 0,76        |
| ENSG00000165899 | OTOGL       | -2,17    | 0,62        |
| ENSG00000185386 | MAPK11      | -2,17    | 0,77        |
| ENSG00000205808 | PLPP6       | -2,17    | 0,84        |
| ENSG00000176563 | CNTD1       | -2,17    | 0,89        |
| ENSG00000119547 | ONECUT2     | -2,17    | 0,88        |
| ENSG00000131779 | PEX11B      | -2,17    | 0,73        |
| ENSG00000092607 | TBX15       | -2,17    | 0,66        |
| ENSG00000196584 | XRCC2       | -2,17    | 0,71        |
| ENSG00000106355 | LSM5        | -2,17    | 0,79        |
| ENSG00000186184 | POLR1D      | -2,17    | 0,79        |
| ENSG00000113448 | PDE4D       | -2,17    | 0,48        |
| ENSG00000272804 | KRTAP10-7   | -2,17    | 0,86        |
| ENSG00000173530 | TNFRSF10D   | -2,17    | 0,69        |
| ENSG00000140950 | TLDC1       | -2,16    | 0,87        |
| ENSG00000070182 | SPTB        | -2,16    | 0,83        |
| ENSG00000198369 | SPRED2      | -2,16    | 0,76        |
| ENSG00000197162 | ZNF785      | -2,16    | 0,73        |
| ENSG00000134480 | CCNH        | -2,16    | 0,79        |
| ENSG00000156869 | FRRS1       | -2,16    | 0,70        |
| ENSG00000184709 | LRRC26      | -2,16    | 0,77        |
| ENSG00000174607 | UGT8        | -2,16    | 0,49        |
| ENSG00000112787 | FBRSL1      | -2,16    | 0,82        |
| ENSG00000120324 | PCDHB10     | -2,16    | 0,71        |
| ENSG00000166595 | FAM96B      | -2,16    | 0,81        |
| ENSG00000188089 | PLA2G4E     | -2,16    | 0,83        |
| ENSG00000170209 | ANKK1       | -2,16    | 0,82        |
| ENSG00000206102 | KRTAP19-8   | -2,16    | 0,61        |
| ENSG00000185504 | FAAP100     | -2,15    | 0,83        |
| ENSG00000164764 | SBSPON      | -2,15    | 0,89        |

| ensembl gene    | gene symbol | Score(d) | Fold Change |
|-----------------|-------------|----------|-------------|
| ENSG00000198863 | RUNDC1      | -2,15    | 0,81        |
| ENSG00000142541 | RPL13A      | -2,15    | 0,72        |
| ENSG00000114503 | NCBP2       | -2,15    | 0,80        |
| ENSG00000160323 | ADAMTS13    | -2,15    | 0,91        |
| ENSG00000204348 | DXO         | -2,15    | 0,79        |
| ENSG00000166326 | TRIM44      | -2,15    | 0,82        |
| ENSG00000133063 | CHIT1       | -2,15    | 0,79        |
| ENSG00000108599 | AKAP10      | -2,15    | 0,83        |
| ENSG00000186912 | P2RY4       | -2,15    | 0,87        |
| ENSG00000152229 | PSTPIP2     | -2,15    | 0,62        |
| ENSG00000107338 | SHB         | -2,15    | 0,83        |
| ENSG00000152380 | FAM151B     | -2,15    | 0,69        |
| ENSG00000214113 | LYRM4       | -2,15    | 0,63        |
| ENSG00000175899 | A2M         | -2,15    | 0,66        |
| ENSG00000066294 | CD84        | -2,15    | 0,65        |
| ENSG00000205758 | CRYZL1      | -2,15    | 0,79        |
| ENSG00000136156 | ITM2B       | -2,15    | 0,79        |
| ENSG00000090534 | THPO        | -2,15    | 0,78        |
| ENSG00000203782 | LOR         | -2,15    | 0,91        |
| ENSG00000179564 | LSMEM2      | -2,15    | 0,89        |
| ENSG00000157303 | SUSD3       | -2,14    | 0,72        |
| ENSG00000116191 | RALGPS2     | -2,14    | 0,73        |
| ENSG00000234465 | PINLYP      | -2,14    | 0,80        |
| ENSG00000168509 | HFE2        | -2,14    | 0,86        |
| ENSG00000214013 | GANC        | -2,14    | 0,74        |
| ENSG00000133083 | DCLK1       | -2,14    | 0,57        |
| ENSG00000156042 | CFAP70      | -2,14    | 0,82        |
| ENSG00000188389 | PDCD1       | -2,14    | 0,88        |
| ENSG00000166377 | ATP9B       | -2,14    | 0,79        |
| ENSG00000160551 | TAOK1       | -2,14    | 0,82        |
| ENSG00000111537 | IFNG        | -2,14    | 0,72        |
| ENSG00000198326 | TMEM239     | -2,14    | 0,87        |
| ENSG00000159314 | ARHGAP27    | -2,14    | 0,83        |
| ENSG00000137077 | CCL21       | -2,14    | 0,91        |
| ENSG00000129128 | SPCS3       | -2,14    | 0,84        |
| ENSG00000104884 | ERCC2       | -2,14    | 0,80        |
| ENSG00000186790 | FOXE3       | -2,14    | 0,91        |
| ENSG00000162994 | CLHC1       | -2,14    | 0,75        |
| ENSG00000184988 | TMEM106A    | -2,14    | 0,78        |
| ENSG00000158966 | CACHD1      | -2,14    | 0,69        |
| ENSG00000130508 | PXDN        | -2,13    | 0,42        |
| ENSG00000169085 | C8orf46     | -2,13    | 0,77        |
| ENSG00000185340 | GAS2L1      | -2,13    | 0,86        |
| ENSG00000213339 | QTRT1       | -2,13    | 0,79        |
| ENSG00000124469 | CEACAM8     | -2,13    | 0,53        |
| ENSG00000117013 | KCNQ4       | -2,13    | 0,88        |
| ENSG00000145087 | STXBP5L     | -2,13    | 0,61        |
| ENSG00000101825 | MXRA5       | -2,13    | 0,88        |
| ENSG00000148090 | AUH         | -2,13    | 0,85        |

| ensembl gene    | gene symbol | Score(d) | Fold Change |
|-----------------|-------------|----------|-------------|
| ENSG00000003436 | TFPI        | -2,13    | 0,60        |
| ENSG00000133460 | SLC2A11     | -2,13    | 0,81        |
| ENSG00000112237 | CCNC        | -2,13    | 0,77        |
| ENSG00000155755 | TMEM237     | -2,13    | 0,68        |
| ENSG00000259431 | THTPA       | -2,13    | 0,77        |
| ENSG00000183117 | CSMD1       | -2,13    | 0,91        |
| ENSG00000198000 | NOL8        | -2,13    | 0,82        |
| ENSG00000205981 | DNAJC19     | -2,12    | 0,75        |
| ENSG00000113845 | TIMMDC1     | -2,12    | 0,73        |
| ENSG00000242715 | CCDC169     | -2,12    | 0,81        |
| ENSG00000005884 | ITGA3       | -2,12    | 0,81        |
| ENSG00000063241 | ISOC2       | -2,12    | 0,78        |
| ENSG00000204351 | SKIV2L      | -2,12    | 0,84        |
| ENSG00000106799 | TGFBR1      | -2,12    | 0,74        |
| ENSG00000182768 | NGRN        | -2,12    | 0,84        |
| ENSG00000181752 | OR8K5       | -2,12    | 0,89        |
| ENSG00000213654 | GPSM3       | -2,12    | 0,78        |
| ENSG00000171017 | LRRC8E      | -2,12    | 0,88        |
| ENSG00000108684 | ASIC2       | -2,12    | 0,83        |
| ENSG00000142405 | NLRP12      | -2,12    | 0,84        |
| ENSG00000164756 | SLC30A8     | -2,12    | 0,81        |
| ENSG00000188186 | LAMTOR4     | -2,12    | 0,81        |
| ENSG00000147443 | DOK2        | -2,12    | 0,75        |
| ENSG00000149256 | TENM4       | -2,11    | 0,73        |
| ENSG00000140526 | ABHD2       | -2,11    | 0,75        |
| ENSG00000141200 | KIF2B       | -2,11    | 0,91        |
| ENSG00000108846 | ABCC3       | -2,11    | 0,81        |
| ENSG00000155275 | TRMT44      | -2,11    | 0,83        |
| ENSG00000173406 | DAB1        | -2,11    | 0,85        |
| ENSG00000165810 | BTNL9       | -2,11    | 0,87        |
| ENSG00000160679 | CHTOP       | -2,11    | 0,77        |
| ENSG00000260325 | HSPB9       | -2,11    | 0,90        |
| ENSG00000236383 | LINC00854   | -2,11    | 0,83        |
| ENSG00000166886 | NAB2        | -2,11    | 0,82        |
| ENSG00000167766 | ZNF83       | -2,11    | 0,51        |
| ENSG00000144278 | GALNT13     | -2,11    | 0,67        |
| ENSG00000258223 | PRSS58      | -2,11    | 0,90        |
| ENSG00000113391 | FAM172A     | -2,11    | 0,81        |
| ENSG00000117971 | CHRNA4      | -2,11    | 0,81        |
| ENSG00000134882 | UBAC2       | -2,10    | 0,76        |
| ENSG00000148824 | MTG1        | -2,10    | 0,80        |
| ENSG00000204120 | GIGYF2      | -2,10    | 0,86        |
| ENSG00000196159 | FAT4        | -2,10    | 0,59        |
| ENSG00000187987 | ZSCAN23     | -2,10    | 0,83        |
| ENSG00000163803 | PLB1        | -2,10    | 0,79        |
| ENSG00000177947 | ODF3        | -2,10    | 0,88        |
| ENSG00000119929 | CUTC        | -2,10    | 0,85        |
| ENSG00000136478 | TEX2        | -2,10    | 0,79        |
| ENSG00000166002 | SMCO4       | -2,10    | 0,79        |



| ensembl gene    | gene symbol | Score(d) | Fold Change |
|-----------------|-------------|----------|-------------|
| ENSG00000140285 | FGF7        | -2,10    | 0,76        |
| ENSG00000143322 | ABL2        | -2,10    | 0,80        |
| ENSG00000108557 | RAI1        | -2,10    | 0,85        |
| ENSG00000159761 | C16orf86    | -2,10    | 0,84        |
| ENSG00000139974 | SLC38A6     | -2,10    | 0,73        |
| ENSG00000110435 | PDHX        | -2,10    | 0,82        |
| ENSG00000137265 | IRF4        | -2,10    | 0,75        |
| ENSG00000182600 | C2orf82     | -2,10    | 0,85        |
| ENSG00000023516 | AKAP11      | -2,09    | 0,75        |
| ENSG00000137078 | SIT1        | -2,09    | 0,69        |
| ENSG00000165323 | FAT3        | -2,09    | 0,86        |
| ENSG00000111707 | SUDS3       | -2,09    | 0,80        |
| ENSG00000136881 | BAAT        | -2,09    | 0,87        |
| ENSG00000085998 | POMGNT1     | -2,09    | 0,77        |
| ENSG00000162592 | CCDC27      | -2,09    | 0,87        |
| ENSG00000197296 | FITM2       | -2,09    | 0,73        |
| ENSG00000124164 | VAPB        | -2,09    | 0,80        |
| ENSG00000105852 | PON3        | -2,09    | 0,67        |
| ENSG00000078061 | ARAF        | -2,09    | 0,86        |
| ENSG00000131634 | TMEM204     | -2,09    | 0,87        |
| ENSG00000198752 | CDC42BPB    | -2,09    | 0,83        |
| ENSG00000169116 | PARM1       | -2,09    | 0,58        |
| ENSG00000180592 | SKIDA1      | -2,09    | 0,88        |
| ENSG00000164252 | AGGF1       | -2,09    | 0,83        |
| ENSG00000153789 | FAM92B      | -2,08    | 0,82        |
| ENSG00000102057 | KCND1       | -2,08    | 0,84        |
| ENSG00000171914 | TLN2        | -2,08    | 0,77        |
| ENSG00000188060 | RAB42       | -2,08    | 0,82        |
| ENSG00000137571 | SLCO5A1     | -2,08    | 0,58        |
| ENSG00000165059 | PRKACG      | -2,08    | 0,86        |
| ENSG00000122783 | C7orf49     | -2,08    | 0,83        |
| ENSG00000111640 | GAPDH       | -2,08    | 0,81        |
| ENSG00000119335 | SET         | -2,08    | 0,79        |
| ENSG00000198722 | UNC13B      | -2,08    | 0,74        |
| ENSG00000170734 | POLH        | -2,08    | 0,67        |
| ENSG00000168411 | RFWD3       | -2,08    | 0,79        |
| ENSG00000198856 | OSTC        | -2,08    | 0,83        |
| ENSG00000168081 | PNOC        | -2,08    | 0,71        |
| ENSG00000085063 | CD59        | -2,08    | 0,72        |
| ENSG00000165115 | KIF27       | -2,07    | 0,82        |
| ENSG00000180370 | PAK2        | -2,07    | 0,58        |
| ENSG00000154639 | CXADR       | -2,07    | 0,57        |
| ENSG00000127564 | PKMYT1      | -2,07    | 0,79        |
| ENSG00000116584 | ARHGEF2     | -2,07    | 0,62        |
| ENSG00000151348 | EXT2        | -2,07    | 0,79        |
| ENSG00000135451 | TROAP       | -2,07    | 0,79        |
| ENSG00000119899 | SLC17A5     | -2,07    | 0,76        |
| ENSG00000062370 | ZNF112      | -2,07    | 0,73        |
| ENSG00000177469 | PTRF        | -2,07    | 0,88        |

| ensembl gene    | gene symbol | Score(d) | Fold Change |
|-----------------|-------------|----------|-------------|
| ENSG00000094963 | FMO2        | -2,07    | 0,85        |
| ENSG00000183808 | RBM12B      | -2,07    | 0,77        |
| ENSG00000112578 | BYSL        | -2,07    | 0,78        |
| ENSG00000223865 | HLA-DPB1    | -2,07    | 0,65        |
| ENSG00000164070 | HSPA4L      | -2,07    | 0,53        |
| ENSG00000160007 | ARHGAP35    | -2,07    | 0,81        |
| ENSG00000121377 | TAS2R7      | -2,07    | 0,89        |
| ENSG00000178026 | LRRC75B     | -2,07    | 0,86        |
| ENSG00000116044 | NFE2L2      | -2,07    | 0,82        |
| ENSG00000179562 | GCC1        | -2,07    | 0,86        |
| ENSG00000117475 | BLZF1       | -2,07    | 0,71        |
| ENSG00000102780 | DGKH        | -2,06    | 0,71        |
| ENSG00000103168 | TAF1C       | -2,06    | 0,87        |
| ENSG00000108641 | B9D1        | -2,06    | 0,73        |
| ENSG00000162692 | VCAM1       | -2,06    | 0,66        |
| ENSG00000105401 | CDC37       | -2,06    | 0,88        |
| ENSG00000172296 | SPTLC3      | -2,06    | 0,76        |
| ENSG00000183313 | OR52L1      | -2,06    | 0,75        |
| ENSG00000112699 | GMDS        | -2,06    | 0,76        |
| ENSG00000136100 | VPS36       | -2,06    | 0,78        |
| ENSG00000184611 | KCNH7       | -2,06    | 0,86        |
| ENSG00000144559 | TAMM41      | -2,06    | 0,78        |
| ENSG00000147573 | TRIM55      | -2,06    | 0,63        |
| ENSG00000147576 | ADHFE1      | -2,06    | 0,75        |
| ENSG00000103707 | MTFMT       | -2,06    | 0,73        |
| ENSG00000109065 | NAT9        | -2,06    | 0,81        |
| ENSG00000182636 | NDN         | -2,06    | 0,81        |
| ENSG00000169442 | CD52        | -2,06    | 0,79        |
| ENSG00000106012 | IQCE        | -2,06    | 0,79        |
| ENSG00000122786 | CALD1       | -2,06    | 0,67        |
| ENSG00000174238 | PITPNA      | -2,06    | 0,83        |
| ENSG00000183856 | IQGAP3      | -2,06    | 0,84        |
| ENSG00000132026 | RTBDN       | -2,06    | 0,87        |
| ENSG00000106617 | PRKAG2      | -2,06    | 0,82        |
| ENSG00000108001 | EBF3        | -2,06    | 0,84        |
| ENSG00000076826 | CAMSAP3     | -2,06    | 0,76        |
| ENSG00000119630 | PGF         | -2,06    | 0,85        |
| ENSG00000133835 | HSD17B4     | -2,06    | 0,70        |
| ENSG00000165181 | C9orf84     | -2,06    | 0,90        |
| ENSG00000205250 | E2F4        | -2,06    | 0,85        |
| ENSG00000138472 | GUCA1C      | -2,05    | 0,77        |
| ENSG00000075643 | MOCOS       | -2,05    | 0,48        |
| ENSG00000118402 | ELOVL4      | -2,05    | 0,48        |
| ENSG00000115525 | ST3GAL5     | -2,05    | 0,67        |
| ENSG00000130741 | EIF2S3      | -2,05    | 0,79        |
| ENSG00000155465 | SLC7A7      | -2,05    | 0,68        |
| ENSG00000108590 | MED31       | -2,05    | 0,74        |
| ENSG00000114902 | SPCS1       | -2,05    | 0,89        |
| ENSG00000075624 | ACTB        | -2,05    | 0,71        |

| ensembl gene    | gene symbol | Score(d) | Fold Change |
|-----------------|-------------|----------|-------------|
| ENSG00000250305 | KIAA1456    | -2,05    | 0,61        |
| ENSG00000165509 | MAGEC3      | -2,05    | 0,58        |
| ENSG00000186115 | CYP4F2      | -2,05    | 0,77        |
| ENSG00000116017 | ARID3A      | -2,05    | 0,78        |
| ENSG00000168016 | TRANK1      | -2,05    | 0,65        |
| ENSG00000168646 | AXIN2       | -2,05    | 0,76        |
| ENSG00000172264 | MACROD2     | -2,05    | 0,75        |
| ENSG00000111669 | TPI1        | -2,05    | 0,85        |
| ENSG00000130830 | MPP1        | -2,05    | 0,73        |
| ENSG00000236320 | SLFN14      | -2,04    | 0,86        |
| ENSG00000166199 | ALKBH3      | -2,04    | 0,84        |
| ENSG00000172159 | FRMD3       | -2,04    | 0,85        |
| ENSG00000198829 | SUCNR1      | -2,04    | 0,87        |
| ENSG00000138061 | CYP1B1      | -2,04    | 0,83        |
| ENSG00000214050 | FBXO16      | -2,04    | 0,80        |
| ENSG00000185483 | ROR1        | -2,04    | 0,70        |
| ENSG00000183833 | MAATS1      | -2,04    | 0,55        |
| ENSG00000172273 | HINFP       | -2,04    | 0,78        |
| ENSG00000162843 | WDR64       | -2,04    | 0,83        |
| ENSG00000269343 | ZNF587B     | -2,04    | 0,83        |
| ENSG00000158623 | COPG2       | -2,04    | 0,80        |
| ENSG00000146350 | TBC1D32     | -2,04    | 0,62        |
| ENSG00000147454 | SLC25A37    | -2,04    | 0,76        |
| ENSG00000070770 | CSNK2A2     | -2,04    | 0,83        |
| ENSG00000145012 | LPP         | -2,04    | 0,73        |
| ENSG00000184454 | NCMAP       | -2,04    | 0,62        |
| ENSG00000185130 | HIST1H2BL   | -2,04    | 0,69        |
| ENSG00000099250 | NRP1        | -2,04    | 0,60        |
| ENSG00000155966 | AFF2        | -2,04    | 0,56        |
| ENSG00000104723 | TUSC3       | -2,04    | 0,63        |
| ENSG00000163534 | FCRL1       | -2,04    | 0,62        |
| ENSG00000177839 | PCDHB9      | -2,04    | 0,77        |
| ENSG00000196670 | ZFP62       | -2,04    | 0,78        |
| ENSG00000265190 | ANXA8       | -2,04    | 0,85        |
| ENSG00000122254 | HS3ST2      | -2,04    | 0,82        |
| ENSG00000163932 | PRKCD       | -2,04    | 0,76        |
| ENSG00000143457 | GOLPH3L     | -2,04    | 0,66        |
| ENSG00000162775 | RBM15       | -2,04    | 0,79        |
| ENSG00000166451 | CENPN       | -2,04    | 0,69        |
| ENSG00000137135 | ARHGEF39    | -2,04    | 0,81        |
| ENSG00000002726 | AOC1        | -2,04    | 0,70        |
| ENSG00000079739 | PGM1        | -2,03    | 0,78        |
| ENSG00000170035 | UBE2E3      | -2,03    | 0,68        |
| ENSG00000197037 | ZSCAN25     | -2,03    | 0,82        |
| ENSG00000105204 | DYRK1B      | -2,03    | 0,82        |
| ENSG00000165246 | NLGN4Y      | -2,03    | 0,52        |
| ENSG00000180806 | HOXC9       | -2,03    | 0,89        |
| ENSG00000162598 | C1orf87     | -2,03    | 0,80        |
| ENSG00000124786 | SLC35B3     | -2,03    | 0,79        |

| ensembl gene    | gene symbol | Score(d) | Fold Change |
|-----------------|-------------|----------|-------------|
| ENSG00000125207 | PIWIL1      | -2,03    | 0,86        |
| ENSG00000134201 | GSTM5       | -2,03    | 0,82        |
| ENSG00000167515 | TRAPPC2L    | -2,03    | 0,78        |
| ENSG00000153250 | RBMS1       | -2,03    | 0,75        |
| ENSG00000165494 | PCF11       | -2,03    | 0,81        |
| ENSG00000275066 | SYNRG       | -2,03    | 0,79        |
| ENSG00000159784 | FAM131B     | -2,03    | 0,85        |
| ENSG00000174469 | CNTNAP2     | -2,03    | 0,84        |
| ENSG00000149084 | HSD17B12    | -2,03    | 0,82        |
| ENSG00000165131 | C7orf34     | -2,03    | 0,88        |
| ENSG00000279906 | AP002962.1  | -2,03    | 0,89        |
| ENSG00000096654 | ZNF184      | -2,03    | 0,78        |
| ENSG00000134905 | CARS2       | -2,03    | 0,84        |
| ENSG00000105889 | STEAP1B     | -2,03    | 0,72        |
| ENSG00000139718 | SETD1B      | -2,02    | 0,81        |
| ENSG00000165695 | AK8         | -2,02    | 0,82        |
| ENSG00000172365 | OR5B2       | -2,02    | 0,87        |
| ENSG00000129103 | SUMF2       | -2,02    | 0,80        |
| ENSG00000124074 | ENKD1       | -2,02    | 0,86        |
| ENSG00000181143 | MUC16       | -2,02    | 0,91        |
| ENSG00000174292 | TNK1        | -2,02    | 0,88        |
| ENSG00000108784 | NAGLU       | -2,02    | 0,66        |
| ENSG00000187951 | ARHGAP11B   | -2,02    | 0,70        |
| ENSG00000117394 | SLC2A1      | -2,02    | 0,80        |
| ENSG00000110057 | UNC93B1     | -2,02    | 0,76        |
| ENSG00000128383 | APOBEC3A    | -2,02    | 0,68        |
| ENSG00000181481 | RNF135      | -2,02    | 0,84        |
| ENSG00000138738 | PRDM5       | -2,02    | 0,53        |
| ENSG00000167740 | CYB5D2      | -2,02    | 0,81        |
| ENSG00000176209 | SMIM19      | -2,02    | 0,76        |
| ENSG00000081087 | OSTM1       | -2,02    | 0,76        |
| ENSG00000131142 | CCL25       | -2,02    | 0,85        |
| ENSG00000157111 | TMEM171     | -2,02    | 0,78        |
| ENSG00000118849 | RARRES1     | -2,02    | 0,88        |
| ENSG00000033627 | ATP6V0A1    | -2,02    | 0,74        |
| ENSG00000105136 | ZNF419      | -2,02    | 0,78        |
| ENSG00000119392 | GLE1        | -2,02    | 0,84        |
| ENSG00000064270 | ATP2C2      | -2,02    | 0,84        |
| ENSG00000140379 | BCL2A1      | -2,02    | 0,71        |
| ENSG00000010932 | FMO1        | -2,02    | 0,81        |
| ENSG00000127920 | GNG11       | -2,01    | 0,69        |
| ENSG00000160208 | RRP1B       | -2,01    | 0,84        |
| ENSG00000203661 | OR2T5       | -2,01    | 0,85        |
| ENSG00000197465 | GYPE        | -2,01    | 0,73        |
| ENSG00000162711 | NLRP3       | -2,01    | 0,84        |
| ENSG00000179930 | ZNF648      | -2,01    | 0,90        |
| ENSG00000169738 | DCXR        | -2,01    | 0,77        |
| ENSG00000112576 | CCND3       | -2,01    | 0,72        |
| ENSG00000179869 | ABCA13      | -2,01    | 0,82        |

**Supplementary Table S3.** List of 628 specific differentially expressed coding genes in 7 t(11;14)-pPCL compared to 12 t(11;14)-MM cases. Transcripts are ordered according to SAM (d) score.

| ensembl gene    | gene symbol   | Score(d) | Fold Change |
|-----------------|---------------|----------|-------------|
| ENSG00000078043 | PIAS2         | 4,4      | 1,98        |
| ENSG00000165280 | VCP           | 4,21     | 1,44        |
| ENSG00000196705 | ZNF431        | 3,92     | 1,72        |
| ENSG00000088320 | REM1          | 3,8      | 1,31        |
| ENSG00000197647 | ZNF433        | 3,61     | 4,22        |
| ENSG00000177432 | NAP1L5        | 3,53     | 1,44        |
| ENSG00000166479 | TMX3          | 3,53     | 1,69        |
| ENSG00000099624 | ATP5D         | 3,41     | 1,59        |
| ENSG00000155622 | XAGE2         | 3,39     | 1,36        |
| ENSG00000154518 | ATP5G3        | 3,31     | 1,76        |
| ENSG00000103489 | XYLT1         | 3,28     | 4,55        |
| ENSG00000197969 | VPS13A        | 3,27     | 1,62        |
| ENSG00000078596 | ITM2A         | 3,26     | 2,02        |
| ENSG00000205189 | ZBTB10        | 3,26     | 3,05        |
| ENSG00000255302 | EID1          | 3,24     | 1,57        |
| ENSG00000169567 | HINT1         | 3,23     | 1,5         |
| ENSG00000104894 | CD37          | 3,22     | 2,87        |
| ENSG00000266412 | NCOA4         | 3,22     | 2,15        |
| ENSG00000005243 | COPZ2         | 3,2      | 2,59        |
| ENSG00000214194 | LINC00998     | 3,19     | 1,82        |
| ENSG00000116183 | PAPPA2        | 3,19     | 1,32        |
| ENSG00000214954 | LRRC69        | 3,15     | 1,59        |
| ENSG00000123144 | C19orf43      | 3,14     | 1,7         |
| ENSG00000046774 | MAGEC2        | 3,12     | 1,53        |
| ENSG00000204387 | C6orf48       | 3,11     | 1,85        |
| ENSG00000157322 | CLEC18A       | 3,1      | 1,36        |
| ENSG00000115170 | ACVR1         | 3,08     | 1,8         |
| ENSG00000031823 | RANBP3        | 3,07     | 1,24        |
| ENSG00000196660 | SLC30A10      | 3,04     | 1,25        |
| ENSG00000113758 | DBN1          | 3,03     | 2,01        |
| ENSG00000101670 | LIPG          | 3        | 1,8         |
| ENSG00000168539 | CHRM1         | 2,98     | 1,28        |
| ENSG00000183747 | ACSM2A        | 2,97     | 1,61        |
| ENSG00000171987 | C11orf40      | 2,97     | 1,22        |
| ENSG00000158715 | SLC45A3       | 2,95     | 1,4         |
| ENSG00000109193 | SULT1E1       | 2,94     | 1,39        |
| ENSG00000164172 | MOCS2         | 2,93     | 1,99        |
| ENSG00000137100 | DCTN3         | 2,92     | 1,82        |
| ENSG00000186480 | INSIG1        | 2,92     | 2,06        |
| ENSG00000184162 | NR2C2AP       | 2,92     | 1,5         |
| ENSG00000187231 | SESTD1        | 2,92     | 4,43        |
| ENSG00000163898 | LIPH          | 2,91     | 3,62        |
| ENSG00000156697 | UTP14A        | 2,89     | 1,4         |
| ENSG00000171130 | ATP6V0E2      | 2,86     | 1,51        |
| ENSG00000261341 | CTD-2568A17.1 | 2,86     | 1,44        |

| ensembl gene    | gene symbol | Score(d) | Fold Change |
|-----------------|-------------|----------|-------------|
| ENSG00000129654 | FOXJ1       | 2,85     | 1,46        |
| ENSG00000176294 | OR4N2       | 2,85     | 2,07        |
| ENSG00000101911 | PRPS2       | 2,84     | 1,91        |
| ENSG00000178498 | DTX3        | 2,83     | 1,77        |
| ENSG00000102195 | GPR50       | 2,83     | 1,3         |
| ENSG00000075413 | MARK3       | 2,83     | 1,31        |
| ENSG00000159261 | CLDN14      | 2,79     | 2,06        |
| ENSG00000168724 | DNAJC21     | 2,79     | 1,33        |
| ENSG00000081014 | AP4E1       | 2,78     | 1,42        |
| ENSG00000117984 | CTSD        | 2,77     | 1,41        |
| ENSG00000137824 | RMDN3       | 2,77     | 1,31        |
| ENSG00000165164 | CFAP47      | 2,72     | 1,77        |
| ENSG00000062524 | LTK         | 2,72     | 1,91        |
| ENSG00000171295 | ZNF440      | 2,72     | 1,42        |
| ENSG00000283526 | RP11-40A7.2 | 2,69     | 1,31        |
| ENSG00000159579 | RSPRY1      | 2,69     | 1,58        |
| ENSG00000197790 | OR52M1      | 2,68     | 1,33        |
| ENSG00000164647 | STEAP1      | 2,66     | 1,64        |
| ENSG00000033050 | ABCF2       | 2,64     | 1,43        |
| ENSG00000204520 | MICA        | 2,64     | 1,56        |
| ENSG00000148335 | NTMT1       | 2,64     | 1,43        |
| ENSG00000021355 | SERPINB1    | 2,64     | 1,53        |
| ENSG00000150456 | EEF1AKMT1   | 2,63     | 1,34        |
| ENSG00000185085 | INTS5       | 2,63     | 1,48        |
| ENSG00000157800 | SLC37A3     | 2,63     | 2,05        |
| ENSG00000105290 | APLP1       | 2,62     | 1,23        |
| ENSG00000138028 | CGREF1      | 2,62     | 1,36        |
| ENSG00000132286 | TIMM10B     | 2,62     | 1,47        |
| ENSG00000134982 | APC         | 2,61     | 1,58        |
| ENSG00000136717 | BIN1        | 2,61     | 1,75        |
| ENSG00000152223 | EPG5        | 2,61     | 1,31        |
| ENSG00000180573 | HIST1H2AC   | 2,6      | 2,31        |
| ENSG00000179055 | OR13D1      | 2,6      | 1,4         |
| ENSG00000183048 | SLC25A10    | 2,6      | 1,3         |
| ENSG00000133020 | MYH8        | 2,59     | 1,39        |
| ENSG00000115758 | ODC1        | 2,59     | 1,41        |
| ENSG00000135976 | ANKRD36     | 2,58     | 1,96        |
| ENSG00000141161 | UNC45B      | 2,58     | 1,17        |
| ENSG00000130755 | GMFG        | 2,56     | 1,75        |
| ENSG00000090266 | NDUFB2      | 2,56     | 1,43        |
| ENSG00000099785 | MARCHF2     | 2,55     | 1,36        |
| ENSG00000137831 | UACA        | 2,55     | 1,64        |
| ENSG00000147869 | CER1        | 2,54     | 1,26        |
| ENSG00000166869 | CHP2        | 2,54     | 1,28        |
| ENSG00000174137 | FAM53A      | 2,54     | 1,27        |
| ENSG00000048162 | NOP16       | 2,54     | 1,98        |
| ENSG00000128040 | SPINK2      | 2,54     | 1,37        |
| ENSG00000132467 | UTP3        | 2,54     | 1,64        |
| ENSG00000221878 | PSG7        | 2,52     | 1,31        |

| ensembl gene    | gene symbol  | Score(d) | Fold Change |
|-----------------|--------------|----------|-------------|
| ENSG00000139194 | RBP5         | 2,52     | 1,27        |
| ENSG00000167210 | LOXHD1       | 2,51     | 1,2         |
| ENSG00000163069 | SGCB         | 2,51     | 3,64        |
| ENSG00000148835 | TAF5         | 2,51     | 1,44        |
| ENSG00000127580 | WDR24        | 2,51     | 1,26        |
| ENSG00000008277 | ADAM22       | 2,5      | 2,28        |
| ENSG00000183644 | C11orf88     | 2,5      | 1,28        |
| ENSG00000242110 | AMACR        | 2,49     | 1,45        |
| ENSG00000104818 | CGB2         | 2,49     | 1,33        |
| ENSG00000165259 | HDX          | 2,49     | 1,57        |
| ENSG00000127530 | OR7C1        | 2,49     | 1,36        |
| ENSG00000171954 | CYP4F22      | 2,48     | 1,18        |
| ENSG00000086288 | NME8         | 2,48     | 1,65        |
| ENSG00000085741 | WNT11        | 2,48     | 1,46        |
| ENSG00000116783 | TNNI3K       | 2,47     | 1,84        |
| ENSG00000120215 | MLANA        | 2,45     | 1,21        |
| ENSG00000111046 | MYF6         | 2,45     | 2,31        |
| ENSG00000237515 | SHISA9       | 2,45     | 1,3         |
| ENSG00000067248 | DHX29        | 2,44     | 1,38        |
| ENSG00000181218 | HIST3H2A     | 2,44     | 2,22        |
| ENSG00000135972 | MRPS9        | 2,44     | 1,5         |
| ENSG00000105982 | RNF32        | 2,44     | 1,71        |
| ENSG00000167112 | TRUB2        | 2,44     | 1,54        |
| ENSG00000170128 | GPR25        | 2,43     | 1,28        |
| ENSG00000069424 | KCNAB2       | 2,43     | 1,41        |
| ENSG00000173464 | RNASE11      | 2,43     | 1,96        |
| ENSG00000118707 | TGIF2        | 2,43     | 1,6         |
| ENSG00000132846 | ZBED3        | 2,43     | 1,57        |
| ENSG00000169594 | BNC1         | 2,42     | 1,19        |
| ENSG00000181215 | C4orf50      | 2,42     | 1,2         |
| ENSG00000283697 | RP5-937E21.8 | 2,42     | 1,32        |
| ENSG00000146755 | TRIM50       | 2,42     | 1,39        |
| ENSG00000188761 | BCL2L15      | 2,41     | 1,62        |
| ENSG00000197603 | C5orf42      | 2,41     | 1,57        |
| ENSG00000163749 | CCDC158      | 2,41     | 1,82        |
| ENSG00000158315 | RHBDL2       | 2,41     | 1,28        |
| ENSG00000120725 | SIL1         | 2,41     | 1,59        |
| ENSG00000006042 | TMEM98       | 2,41     | 1,43        |
| ENSG00000213973 | ZNF99        | 2,41     | 1,29        |
| ENSG00000113318 | MSH3         | 2,4      | 1,32        |
| ENSG00000196368 | NUDT11       | 2,4      | 1,63        |
| ENSG00000166743 | ACSM1        | 2,39     | 1,43        |
| ENSG00000140471 | LINS1        | 2,39     | 1,48        |
| ENSG00000166557 | TMED3        | 2,39     | 1,69        |
| ENSG00000174963 | ZIC4         | 2,39     | 1,24        |
| ENSG00000197410 | DCHS2        | 2,38     | 1,27        |
| ENSG00000213160 | KLHL23       | 2,38     | 1,96        |
| ENSG00000105085 | MED26        | 2,38     | 1,67        |
| ENSG00000029725 | RABEP1       | 2,38     | 1,63        |

| ensembl gene    | gene symbol | Score(d) | Fold Change |
|-----------------|-------------|----------|-------------|
| ENSG00000214842 | RAD51AP2    | 2,38     | 1,14        |
| ENSG00000149050 | ZNF214      | 2,38     | 1,27        |
| ENSG00000086289 | EPDR1       | 2,37     | 2,01        |
| ENSG00000082516 | GEMIN5      | 2,37     | 1,7         |
| ENSG00000113580 | NR3C1       | 2,37     | 1,54        |
| ENSG00000138315 | OIT3        | 2,37     | 1,3         |
| ENSG00000241241 | KRTAP4-16   | 2,36     | 1,54        |
| ENSG00000125841 | NRSN2       | 2,36     | 1,59        |
| ENSG00000241128 | OR14A2      | 2,36     | 1,46        |
| ENSG00000176406 | RIMS2       | 2,36     | 3,4         |
| ENSG00000166582 | CENPV       | 2,35     | 1,7         |
| ENSG00000166411 | IDH3A       | 2,35     | 1,35        |
| ENSG00000186329 | TMEM212     | 2,35     | 1,46        |
| ENSG00000173335 | CST9        | 2,34     | 1,21        |
| ENSG00000196890 | HIST3H2BB   | 2,34     | 1,68        |
| ENSG00000109805 | NCAPG       | 2,34     | 2,12        |
| ENSG00000168143 | FAM83B      | 2,33     | 1,23        |
| ENSG00000069764 | PLA2G10     | 2,33     | 2,1         |
| ENSG00000227500 | SCAMP4      | 2,33     | 1,48        |
| ENSG00000172031 | EPHX4       | 2,32     | 1,43        |
| ENSG00000108479 | GALK1       | 2,32     | 1,21        |
| ENSG00000169856 | ONECUT1     | 2,31     | 1,28        |
| ENSG00000004975 | DVL2        | -2,14    | 0,75        |
| ENSG00000165457 | FOLR2       | -2,14    | 0,65        |
| ENSG00000140678 | ITGAX       | -2,14    | 0,61        |
| ENSG00000126773 | PCNX4       | -2,14    | 0,59        |
| ENSG00000179902 | C1orf194    | -2,15    | 0,83        |
| ENSG00000105479 | CCDC114     | -2,15    | 0,75        |
| ENSG00000196505 | GDAP2       | -2,15    | 0,71        |
| ENSG00000197584 | KCNMB2      | -2,15    | 0,36        |
| ENSG00000104643 | MTMR9       | -2,15    | 0,69        |
| ENSG00000071909 | MYO3B       | -2,15    | 0,38        |
| ENSG00000116690 | PRG4        | -2,15    | 0,72        |
| ENSG00000170989 | S1PR1       | -2,15    | 0,41        |
| ENSG00000160055 | TMEM234     | -2,15    | 0,76        |
| ENSG00000198894 | CIPC        | -2,16    | 0,73        |
| ENSG00000126456 | IRF3        | -2,16    | 0,69        |
| ENSG00000143353 | LYPLAL1     | -2,16    | 0,62        |
| ENSG00000132688 | NES         | -2,16    | 0,43        |
| ENSG00000112033 | PPARD       | -2,16    | 0,74        |
| ENSG00000103769 | RAB11A      | -2,16    | 0,73        |
| ENSG00000215343 | ZNF705D     | -2,16    | 0,8         |
| ENSG00000150967 | ABCB9       | -2,17    | 0,6         |
| ENSG00000001629 | ANKIB1      | -2,17    | 0,67        |
| ENSG00000196372 | ASB13       | -2,17    | 0,7         |
| ENSG00000168772 | CXXC4       | -2,17    | 0,4         |
| ENSG00000178852 | EFCAB13     | -2,17    | 0,63        |
| ENSG00000082482 | KCNK2       | -2,17    | 0,81        |
| ENSG00000197879 | MYO1C       | -2,17    | 0,65        |



| ensembl gene    | gene symbol | Score(d) | Fold Change |
|-----------------|-------------|----------|-------------|
| ENSG00000197428 | OR51D1      | -2,17    | 0,72        |
| ENSG00000131788 | PIAS3       | -2,17    | 0,74        |
| ENSG00000132424 | PNISR       | -2,17    | 0,77        |
| ENSG00000168447 | SCNN1B      | -2,17    | 0,42        |
| ENSG00000078269 | SYNJ2       | -2,17    | 0,75        |
| ENSG00000204186 | ZDBF2       | -2,17    | 0,62        |
| ENSG00000100246 | DNAL4       | -2,18    | 0,65        |
| ENSG00000100292 | HMOX1       | -2,18    | 0,51        |
| ENSG00000149243 | KLHL35      | -2,18    | 0,68        |
| ENSG00000184384 | MAML2       | -2,18    | 0,57        |
| ENSG00000156738 | MS4A1       | -2,18    | 0,15        |
| ENSG00000100330 | MTMR3       | -2,18    | 0,64        |
| ENSG00000177479 | ARIH2       | -2,19    | 0,78        |
| ENSG00000162819 | BROX        | -2,19    | 0,76        |
| ENSG00000159189 | C1QC        | -2,19    | 0,48        |
| ENSG00000108091 | CCDC6       | -2,19    | 0,48        |
| ENSG00000143776 | CDC42BPA    | -2,19    | 0,7         |
| ENSG00000165959 | CLMN        | -2,19    | 0,61        |
| ENSG00000152207 | CYSLTR2     | -2,19    | 0,42        |
| ENSG00000174989 | FBXW8       | -2,19    | 0,59        |
| ENSG00000169683 | LRRC45      | -2,19    | 0,71        |
| ENSG00000103150 | MLYCD       | -2,19    | 0,71        |
| ENSG00000141905 | NFIC        | -2,19    | 0,77        |
| ENSG00000046651 | OFD1        | -2,19    | 0,72        |
| ENSG00000135093 | USP30       | -2,19    | 0,7         |
| ENSG00000152213 | ARL11       | -2,2     | 0,66        |
| ENSG00000139624 | CERS5       | -2,2     | 0,71        |
| ENSG00000064961 | HMG20B      | -2,2     | 0,71        |
| ENSG00000123411 | IKZF4       | -2,2     | 0,65        |
| ENSG00000145414 | NAF1        | -2,2     | 0,72        |
| ENSG00000171649 | ZIK1        | -2,2     | 0,57        |
| ENSG00000268089 | GABRQ       | -2,21    | 0,84        |
| ENSG00000154478 | GPR26       | -2,21    | 0,84        |
| ENSG00000145979 | TBC1D7      | -2,21    | 0,62        |
| ENSG00000169905 | TOR1AIP2    | -2,21    | 0,75        |
| ENSG00000178764 | ZHX2        | -2,21    | 0,72        |
| ENSG00000113441 | LNPEP       | -2,22    | 0,54        |
| ENSG00000100023 | PPIL2       | -2,22    | 0,73        |
| ENSG00000132716 | DCAF8       | -2,23    | 0,65        |
| ENSG00000148180 | GSN         | -2,23    | 0,59        |
| ENSG00000196576 | PLXNB2      | -2,23    | 0,57        |
| ENSG00000157985 | AGAP1       | -2,24    | 0,5         |
| ENSG00000166825 | ANPEP       | -2,24    | 0,59        |
| ENSG00000145982 | FARS2       | -2,24    | 0,63        |
| ENSG00000178719 | GRINA       | -2,24    | 0,67        |
| ENSG00000140443 | IGF1R       | -2,24    | 0,55        |
| ENSG00000187193 | MT1X        | -2,24    | 0,4         |
| ENSG00000100228 | RAB36       | -2,24    | 0,48        |
| ENSG00000059804 | SLC2A3      | -2,24    | 0,49        |

| ensembl gene    | gene symbol   | Score(d) | Fold Change |
|-----------------|---------------|----------|-------------|
| ENSG00000176994 | SMCR8         | -2,24    | 0,73        |
| ENSG00000178917 | ZNF852        | -2,24    | 0,71        |
| ENSG00000166669 | ATF7IP2       | -2,25    | 0,4         |
| ENSG00000043039 | BARX2         | -2,25    | 0,57        |
| ENSG00000164597 | COG5          | -2,25    | 0,67        |
| ENSG00000166503 | RP11-382A20.3 | -2,25    | 0,81        |
| ENSG00000139874 | SSTR1         | -2,25    | 0,79        |
| ENSG00000197782 | ZNF780A       | -2,25    | 0,64        |
| ENSG00000182183 | FAM159A       | -2,26    | 0,53        |
| ENSG00000108306 | FBXL20        | -2,26    | 0,64        |
| ENSG00000168310 | IRF2          | -2,26    | 0,52        |
| ENSG00000116962 | NID1          | -2,26    | 0,77        |
| ENSG00000143811 | PYCR2         | -2,26    | 0,59        |
| ENSG00000157216 | SSBP3         | -2,26    | 0,7         |
| ENSG00000136295 | TTYH3         | -2,26    | 0,71        |
| ENSG00000035403 | VCL           | -2,26    | 0,62        |
| ENSG00000173210 | ABLIM3        | -2,27    | 0,78        |
| ENSG00000158435 | CNOT11        | -2,27    | 0,81        |
| ENSG00000175592 | FOSL1         | -2,27    | 0,79        |
| ENSG00000138944 | KIAA1644      | -2,27    | 0,76        |
| ENSG00000213626 | LBH           | -2,27    | 0,68        |
| ENSG00000156463 | SH3RF2        | -2,27    | 0,6         |
| ENSG00000111348 | ARHGDIB       | -2,28    | 0,73        |
| ENSG00000167861 | HID1          | -2,28    | 0,59        |
| ENSG00000175536 | LIPT2         | -2,28    | 0,74        |
| ENSG00000131368 | MRPS25        | -2,28    | 0,75        |
| ENSG00000122728 | TAF1L         | -2,28    | 0,79        |
| ENSG00000154945 | ANKRD40       | -2,29    | 0,74        |
| ENSG00000073598 | FNDC8         | -2,29    | 0,88        |
| ENSG00000135423 | GLS2          | -2,29    | 0,75        |
| ENSG00000163875 | MEAF6         | -2,29    | 0,74        |
| ENSG00000100600 | LGMN          | -2,3     | 0,41        |
| ENSG00000162148 | PPP1R32       | -2,3     | 0,81        |
| ENSG00000079841 | RIMS1         | -2,3     | 0,39        |
| ENSG00000137210 | TMEM14B       | -2,3     | 0,7         |
| ENSG00000158201 | ABHD3         | -2,31    | 0,68        |
| ENSG00000099814 | CEP170B       | -2,31    | 0,69        |
| ENSG00000112679 | DUSP22        | -2,31    | 0,6         |
| ENSG00000163545 | NUAK2         | -2,31    | 0,52        |
| ENSG00000115020 | PIKFYVE       | -2,31    | 0,65        |
| ENSG00000100218 | RSPH14        | -2,31    | 0,66        |
| ENSG00000162722 | TRIM58        | -2,31    | 0,78        |
| ENSG00000115446 | UNC50         | -2,31    | 0,73        |
| ENSG00000166432 | ZMAT1         | -2,31    | 0,46        |
| ENSG00000143621 | ILF2          | -2,32    | 0,79        |
| ENSG00000073169 | SELO          | -2,32    | 0,76        |
| ENSG00000185669 | SNAI3         | -2,32    | 0,75        |
| ENSG00000173890 | GPR160        | -2,33    | 0,53        |
| ENSG00000105650 | PDE4C         | -2,33    | 0,78        |

| ensembl gene    | gene symbol | Score(d) | Fold Change |
|-----------------|-------------|----------|-------------|
| ENSG00000130024 | PHF10       | -2,33    | 0,71        |
| ENSG00000149346 | SLX4IP      | -2,33    | 0,58        |
| ENSG00000179832 | MROH1       | -2,34    | 0,77        |
| ENSG00000169439 | SDC2        | -2,34    | 0,26        |
| ENSG00000125835 | SNRPB       | -2,34    | 0,62        |
| ENSG00000179085 | DPM3        | -2,35    | 0,63        |
| ENSG00000180447 | GAS1        | -2,35    | 0,67        |
| ENSG00000164654 | MIOS        | -2,35    | 0,57        |
| ENSG00000163877 | SNIP1       | -2,35    | 0,62        |
| ENSG00000137801 | THBS1       | -2,35    | 0,36        |
| ENSG00000089063 | TMEM230     | -2,35    | 0,76        |
| ENSG00000127837 | AAMP        | -2,36    | 0,74        |
| ENSG00000106077 | ABHD11      | -2,36    | 0,67        |
| ENSG00000013016 | EHD3        | -2,36    | 0,4         |
| ENSG00000177138 | FAM9B       | -2,36    | 0,77        |
| ENSG00000196126 | HLA-DRB1    | -2,36    | 0,34        |
| ENSG00000174943 | KCTD13      | -2,36    | 0,78        |
| ENSG00000162511 | LAPTM5      | -2,36    | 0,28        |
| ENSG00000180658 | OR2A4       | -2,36    | 0,75        |
| ENSG00000204531 | POU5F1      | -2,36    | 0,43        |
| ENSG00000088179 | PTPN4       | -2,36    | 0,66        |
| ENSG00000187147 | RNF220      | -2,37    | 0,75        |
| ENSG00000116497 | S100PBP     | -2,37    | 0,61        |
| ENSG00000129657 | SEC14L1     | -2,37    | 0,62        |
| ENSG00000072657 | TRHDE       | -2,37    | 0,63        |
| ENSG00000135686 | KLHL36      | -2,38    | 0,51        |
| ENSG00000063322 | MED29       | -2,38    | 0,8         |
| ENSG00000090402 | SI          | -2,38    | 0,59        |
| ENSG00000002745 | WNT16       | -2,38    | 0,61        |
| ENSG00000178665 | ZNF713      | -2,38    | 0,46        |
| ENSG00000260314 | MRC1        | -2,39    | 0,7         |
| ENSG00000078177 | N4BP2       | -2,39    | 0,63        |
| ENSG00000225973 | PIGBOS1     | -2,39    | 0,76        |
| ENSG00000154822 | PLCL2       | -2,39    | 0,5         |
| ENSG00000040487 | PQLC2       | -2,39    | 0,68        |
| ENSG00000125409 | TEKT3       | -2,39    | 0,67        |
| ENSG00000204815 | TTC25       | -2,39    | 0,78        |
| ENSG00000130208 | APOC1       | -2,4     | 0,58        |
| ENSG00000228439 | TSTD3       | -2,4     | 0,63        |
| ENSG00000172466 | ZNF24       | -2,4     | 0,72        |
| ENSG00000197070 | ARRDC1      | -2,41    | 0,69        |
| ENSG00000178585 | CTNNBIP1    | -2,41    | 0,82        |
| ENSG00000115866 | DARS        | -2,41    | 0,61        |
| ENSG00000185112 | FAM43A      | -2,41    | 0,54        |
| ENSG00000162729 | IGSF8       | -2,41    | 0,67        |
| ENSG00000167419 | LPO         | -2,41    | 0,63        |
| ENSG00000161664 | ASB16       | -2,42    | 0,72        |
| ENSG00000112303 | VNN2        | -2,42    | 0,38        |
| ENSG00000185278 | ZBTB37      | -2,42    | 0,67        |

| ensembl gene    | gene symbol | Score(d) | Fold Change |
|-----------------|-------------|----------|-------------|
| ENSG00000196569 | LAMA2       | -2,43    | 0,28        |
| ENSG00000089022 | MAPKAPK5    | -2,43    | 0,76        |
| ENSG00000134744 | ZCCHC11     | -2,43    | 0,64        |
| ENSG00000187474 | FPR3        | -2,44    | 0,64        |
| ENSG00000213015 | ZNF580      | -2,44    | 0,82        |
| ENSG00000221869 | CEBPD       | -2,45    | 0,71        |
| ENSG00000133878 | DUSP26      | -2,45    | 0,43        |
| ENSG00000100578 | KIAA0586    | -2,45    | 0,64        |
| ENSG00000091106 | NLRC4       | -2,45    | 0,79        |
| ENSG00000091490 | SEL1L3      | -2,45    | 0,56        |
| ENSG00000116525 | TRIM62      | -2,45    | 0,64        |
| ENSG00000187815 | ZFP69       | -2,45    | 0,65        |
| ENSG00000119725 | ZNF410      | -2,45    | 0,43        |
| ENSG00000138175 | ARL3        | -2,46    | 0,64        |
| ENSG00000173065 | FAM222B     | -2,46    | 0,68        |
| ENSG00000010626 | LRRC23      | -2,46    | 0,68        |
| ENSG00000160058 | BSDC1       | -2,47    | 0,66        |
| ENSG00000180340 | FZD2        | -2,47    | 0,78        |
| ENSG00000107147 | KCNT1       | -2,47    | 0,67        |
| ENSG00000185900 | POMK        | -2,47    | 0,54        |
| ENSG00000149212 | SESN3       | -2,47    | 0,66        |
| ENSG00000106868 | SUSD1       | -2,47    | 0,42        |
| ENSG00000116918 | TSNAX       | -2,47    | 0,36        |
| ENSG00000163795 | ZNF513      | -2,47    | 0,77        |
| ENSG00000104765 | BNIP3L      | -2,48    | 0,71        |
| ENSG00000167346 | MMP26       | -2,48    | 0,77        |
| ENSG00000188021 | UBQLN2      | -2,48    | 0,65        |
| ENSG00000158195 | WASF2       | -2,48    | 0,68        |
| ENSG00000100299 | ARSA        | -2,49    | 0,59        |
| ENSG00000168763 | CNNM3       | -2,49    | 0,73        |
| ENSG00000111652 | COPS7A      | -2,49    | 0,65        |
| ENSG00000118260 | CREB1       | -2,49    | 0,7         |
| ENSG00000147654 | EBAG9       | -2,5     | 0,74        |
| ENSG00000046647 | GEMIN8      | -2,5     | 0,65        |
| ENSG00000133818 | RRAS2       | -2,5     | 0,2         |
| ENSG00000053770 | AP5M1       | -2,51    | 0,71        |
| ENSG00000051523 | CYBA        | -2,51    | 0,64        |
| ENSG00000108950 | FAM20A      | -2,51    | 0,71        |
| ENSG00000162735 | PEX19       | -2,51    | 0,69        |
| ENSG00000196812 | ZSCAN16     | -2,51    | 0,65        |
| ENSG00000132906 | CASP9       | -2,52    | 0,77        |
| ENSG00000109220 | CHIC2       | -2,52    | 0,61        |
| ENSG00000121316 | PLBD1       | -2,52    | 0,37        |
| ENSG00000282218 | RP1-179P9.3 | -2,52    | 0,51        |
| ENSG00000143252 | SDHC        | -2,52    | 0,62        |
| ENSG00000109133 | TMEM33      | -2,52    | 0,71        |
| ENSG00000168556 | ING2        | -2,53    | 0,73        |
| ENSG00000109436 | TBC1D9      | -2,53    | 0,58        |
| ENSG00000188167 | TMPPE       | -2,53    | 0,59        |

| ensembl gene    | gene symbol | Score(d) | Fold Change |
|-----------------|-------------|----------|-------------|
| ENSG00000170634 | ACYP2       | -2,54    | 0,75        |
| ENSG00000085224 | ATRX        | -2,54    | 0,63        |
| ENSG00000173372 | C1QA        | -2,54    | 0,53        |
| ENSG00000144677 | CTDSPL      | -2,54    | 0,64        |
| ENSG00000213859 | KCTD11      | -2,54    | 0,68        |
| ENSG00000090975 | PITPNM2     | -2,54    | 0,7         |
| ENSG00000136059 | VILL        | -2,54    | 0,76        |
| ENSG00000178562 | CD28        | -2,55    | 0,22        |
| ENSG00000133114 | GPALPP1     | -2,55    | 0,68        |
| ENSG00000163884 | KLF15       | -2,55    | 0,65        |
| ENSG00000075914 | EXOSC7      | -2,56    | 0,69        |
| ENSG00000237541 | HLA-DQA2    | -2,56    | 0,75        |
| ENSG00000087253 | LPCAT2      | -2,56    | 0,37        |
| ENSG00000138593 | SECISBP2L   | -2,56    | 0,56        |
| ENSG00000175137 | SH3BP5L     | -2,56    | 0,57        |
| ENSG00000135605 | TEC         | -2,56    | 0,55        |
| ENSG00000155659 | VSIG4       | -2,56    | 0,63        |
| ENSG00000167363 | FN3K        | -2,57    | 0,29        |
| ENSG00000011405 | PIK3C2A     | -2,57    | 0,63        |
| ENSG00000109099 | PMP22       | -2,57    | 0,6         |
| ENSG00000149634 | SPATA25     | -2,57    | 0,66        |
| ENSG00000215454 | KRTAP10-4   | -2,58    | 0,71        |
| ENSG00000107719 | PALD1       | -2,58    | 0,52        |
| ENSG00000120594 | PLXDC2      | -2,58    | 0,47        |
| ENSG00000184716 | SERINC4     | -2,58    | 0,59        |
| ENSG00000163633 | C4orf36     | -2,59    | 0,69        |
| ENSG00000257365 | FNTB        | -2,59    | 0,56        |
| ENSG00000135525 | MAP7        | -2,59    | 0,41        |
| ENSG00000197943 | PLCG2       | -2,6     | 0,59        |
| ENSG00000203943 | SAMD13      | -2,6     | 0,54        |
| ENSG00000120088 | CRHR1       | -2,61    | 0,57        |
| ENSG00000100105 | PATZ1       | -2,61    | 0,67        |
| ENSG00000174695 | TMEM167A    | -2,61    | 0,71        |
| ENSG00000184867 | ARMCX2      | -2,62    | 0,49        |
| ENSG00000179941 | BBS10       | -2,62    | 0,63        |
| ENSG00000163528 | CHCHD4      | -2,62    | 0,74        |
| ENSG00000213416 | KRTAP4-12   | -2,62    | 0,72        |
| ENSG00000197629 | MPEG1       | -2,62    | 0,37        |
| ENSG00000166428 | PLD4        | -2,62    | 0,28        |
| ENSG00000009413 | REV3L       | -2,62    | 0,63        |
| ENSG00000089775 | ZBTB25      | -2,62    | 0,72        |
| ENSG00000164048 | ZNF589      | -2,62    | 0,61        |
| ENSG00000126759 | CFP         | -2,63    | 0,74        |
| ENSG00000118496 | FBXO30      | -2,63    | 0,64        |
| ENSG00000280165 | PCDH20      | -2,63    | 0,5         |
| ENSG00000052126 | PLEKHA5     | -2,63    | 0,38        |
| ENSG00000013392 | RWDD2A      | -2,63    | 0,67        |
| ENSG00000143183 | TMCO1       | -2,63    | 0,68        |
| ENSG00000250254 | PTTG2       | -2,64    | 0,66        |

| ensembl gene    | gene symbol   | Score(d) | Fold Change |
|-----------------|---------------|----------|-------------|
| ENSG00000104450 | SPAG1         | -2,64    | 0,57        |
| ENSG00000116194 | ANGPTL1       | -2,65    | 0,59        |
| ENSG00000106080 | FKBP14        | -2,65    | 0,62        |
| ENSG00000152240 | HAUS1         | -2,65    | 0,53        |
| ENSG00000047597 | XK            | -2,65    | 0,63        |
| ENSG00000180660 | MAB21L1       | -2,66    | 0,5         |
| ENSG00000168026 | TTC21A        | -2,66    | 0,61        |
| ENSG00000111666 | CHPT1         | -2,67    | 0,45        |
| ENSG00000148730 | EIF4EBP2      | -2,67    | 0,69        |
| ENSG00000158711 | ELK4          | -2,67    | 0,76        |
| ENSG00000143614 | GATAD2B       | -2,67    | 0,73        |
| ENSG00000144401 | METTL21A      | -2,67    | 0,54        |
| ENSG00000156467 | UQCRB         | -2,67    | 0,7         |
| ENSG00000153048 | CARHSP1       | -2,68    | 0,67        |
| ENSG00000187239 | FNBP1         | -2,68    | 0,17        |
| ENSG00000178922 | HYI           | -2,68    | 0,59        |
| ENSG00000197646 | PDCD1LG2      | -2,68    | 0,44        |
| ENSG00000164548 | TRA2A         | -2,68    | 0,75        |
| ENSG00000171606 | ZNF274        | -2,68    | 0,65        |
| ENSG00000184640 | SEPTIN9       | -2,68    | 0,56        |
| ENSG00000101938 | CHRD1         | -2,69    | 0,61        |
| ENSG00000144445 | KANSL1L       | -2,69    | 0,44        |
| ENSG00000072042 | RDH11         | -2,69    | 0,65        |
| ENSG00000038427 | VCAN          | -2,69    | 0,57        |
| ENSG00000135974 | C2orf49       | -2,7     | 0,66        |
| ENSG00000135678 | CPM           | -2,7     | 0,34        |
| ENSG00000118922 | KLF12         | -2,7     | 0,45        |
| ENSG00000175482 | POLD4         | -2,7     | 0,56        |
| ENSG00000144792 | ZNF660        | -2,7     | 0,32        |
| ENSG00000090659 | CD209         | -2,71    | 0,55        |
| ENSG00000196092 | PAX5          | -2,71    | 0,51        |
| ENSG00000138777 | PPA2          | -2,71    | 0,56        |
| ENSG00000258644 | SYNJ2BP-COX16 | -2,71    | 0,51        |
| ENSG00000134717 | BTF3L4        | -2,72    | 0,63        |
| ENSG00000011600 | TYROBP        | -2,72    | 0,54        |
| ENSG00000111254 | AKAP3         | -2,73    | 0,65        |
| ENSG00000111642 | CHD4          | -2,74    | 0,77        |
| ENSG00000132199 | ENOSF1        | -2,74    | 0,55        |
| ENSG00000185442 | FAM174B       | -2,74    | 0,5         |
| ENSG00000158869 | FCER1G        | -2,74    | 0,38        |
| ENSG00000182255 | KCNA4         | -2,74    | 0,59        |
| ENSG00000112394 | SLC16A10      | -2,74    | 0,59        |
| ENSG00000049618 | ARID1B        | -2,75    | 0,66        |
| ENSG00000149418 | ST14          | -2,75    | 0,31        |
| ENSG00000143258 | USP21         | -2,75    | 0,65        |
| ENSG00000185101 | ANO9          | -2,76    | 0,58        |
| ENSG00000100632 | ERH           | -2,76    | 0,53        |
| ENSG00000143442 | POGZ          | -2,76    | 0,66        |
| ENSG00000004468 | CD38          | -2,77    | 0,68        |

| ensembl gene    | gene symbol | Score(d) | Fold Change |
|-----------------|-------------|----------|-------------|
| ENSG00000205593 | DENND6B     | -2,77    | 0,43        |
| ENSG00000215251 | FASTKD5     | -2,77    | 0,62        |
| ENSG00000142599 | RERE        | -2,77    | 0,49        |
| ENSG00000139971 | C14orf37    | -2,78    | 0,58        |
| ENSG00000116285 | ERRFI1      | -2,78    | 0,44        |
| ENSG00000187210 | GCNT1       | -2,78    | 0,55        |
| ENSG00000134375 | TIMM17A     | -2,78    | 0,54        |
| ENSG00000196998 | WDR45       | -2,78    | 0,69        |
| ENSG00000130787 | HIP1R       | -2,79    | 0,69        |
| ENSG00000169403 | PTAFR       | -2,79    | 0,64        |
| ENSG00000166833 | NAV2        | -2,8     | 0,43        |
| ENSG00000095397 | WHRN        | -2,8     | 0,4         |
| ENSG00000135338 | LCA5        | -2,81    | 0,39        |
| ENSG00000203737 | GPR52       | -2,83    | 0,48        |
| ENSG00000170962 | PDGFD       | -2,83    | 0,53        |
| ENSG00000117533 | VAMP4       | -2,83    | 0,57        |
| ENSG00000160345 | C9orf116    | -2,84    | 0,44        |
| ENSG00000185477 | GPRIN3      | -2,84    | 0,26        |
| ENSG00000136161 | RCBTB2      | -2,84    | 0,49        |
| ENSG00000143013 | LMO4        | -2,85    | 0,63        |
| ENSG00000164920 | OSR2        | -2,85    | 0,6         |
| ENSG00000182185 | RAD51B      | -2,85    | 0,5         |
| ENSG00000187676 | B3GLCT      | -2,86    | 0,47        |
| ENSG00000133704 | IPO8        | -2,87    | 0,47        |
| ENSG00000135048 | TMEM2       | -2,87    | 0,29        |
| ENSG00000135144 | DTX1        | -2,88    | 0,38        |
| ENSG00000186951 | PPARA       | -2,88    | 0,64        |
| ENSG00000197249 | SERPINA1    | -2,89    | 0,47        |
| ENSG00000078140 | UBE2K       | -2,89    | 0,65        |
| ENSG00000100445 | SDR39U1     | -2,91    | 0,7         |
| ENSG00000168038 | ULK4        | -2,91    | 0,51        |
| ENSG00000006740 | ARHGAP44    | -2,92    | 0,29        |
| ENSG00000147144 | CCDC120     | -2,92    | 0,51        |
| ENSG00000179979 | CRIPAK      | -2,92    | 0,6         |
| ENSG00000174206 | C12orf66    | -2,93    | 0,71        |
| ENSG00000175470 | PPP2R2D     | -2,93    | 0,67        |
| ENSG00000196405 | EVL         | -2,95    | 0,51        |
| ENSG00000147316 | MCPH1       | -2,95    | 0,66        |
| ENSG00000242114 | MTFP1       | -2,95    | 0,55        |
| ENSG00000177732 | SOX12       | -2,95    | 0,74        |
| ENSG00000189241 | TSPYL1      | -2,95    | 0,71        |
| ENSG00000147408 | CSGALNACT1  | -2,96    | 0,37        |
| ENSG00000101384 | JAG1        | -2,96    | 0,42        |
| ENSG00000125952 | MAX         | -2,96    | 0,68        |
| ENSG00000184905 | TCEAL2      | -2,96    | 0,69        |
| ENSG00000090316 | MAEA        | -2,97    | 0,73        |
| ENSG00000170525 | PFKFB3      | -2,97    | 0,36        |
| ENSG00000102710 | SUPT20H     | -2,97    | 0,57        |
| ENSG00000167165 | UGT1A6      | -2,97    | 0,62        |

| ensembl gene    | gene symbol | Score(d) | Fold Change |
|-----------------|-------------|----------|-------------|
| ENSG00000118579 | MED28       | -2,98    | 0,62        |
| ENSG00000060749 | QSER1       | -2,98    | 0,71        |
| ENSG00000124557 | BTN1A1      | -2,99    | 0,38        |
| ENSG00000178568 | ERBB4       | -2,99    | 0,26        |
| ENSG00000173369 | C1QB        | -3       | 0,34        |
| ENSG00000152904 | GGPS1       | -3       | 0,61        |
| ENSG00000169499 | PLEKHA2     | -3       | 0,54        |
| ENSG00000119685 | TTLL5       | -3       | 0,61        |
| ENSG00000127507 | ADGRE2      | -3,02    | 0,52        |
| ENSG00000164603 | BMT2        | -3,02    | 0,53        |
| ENSG00000160856 | FCRL3       | -3,02    | 0,36        |
| ENSG00000116574 | RHOU        | -3,03    | 0,63        |
| ENSG00000182578 | CSF1R       | -3,04    | 0,52        |
| ENSG00000175471 | MCTP1       | -3,04    | 0,54        |
| ENSG00000173209 | AHSA2       | -3,05    | 0,67        |
| ENSG00000141441 | GAREM1      | -3,05    | 0,22        |
| ENSG00000144560 | VGLL4       | -3,05    | 0,51        |
| ENSG00000143603 | KCNN3       | -3,07    | 0,43        |
| ENSG00000271605 | MILR1       | -3,07    | 0,29        |
| ENSG00000136643 | RPS6KC1     | -3,09    | 0,45        |
| ENSG00000065970 | FOXJ2       | -3,1     | 0,6         |
| ENSG00000169213 | RAB3B       | -3,1     | 0,33        |
| ENSG00000183291 | SELENOF     | -3,11    | 0,71        |
| ENSG00000145246 | ATP10D      | -3,11    | 0,47        |
| ENSG00000221916 | C19orf73    | -3,11    | 0,56        |
| ENSG00000170949 | ZNF160      | -3,13    | 0,66        |
| ENSG00000114423 | CBLB        | -3,14    | 0,51        |
| ENSG00000101224 | CDC25B      | -3,14    | 0,53        |
| ENSG00000110077 | MS4A6A      | -3,14    | 0,29        |
| ENSG00000011295 | TTC19       | -3,14    | 0,52        |
| ENSG00000137486 | ARRB1       | -3,15    | 0,42        |
| ENSG00000125753 | VASP        | -3,16    | 0,56        |
| ENSG00000170166 | HOXD4       | -3,19    | 0,64        |
| ENSG00000262180 | OCLM        | -3,19    | 0,59        |
| ENSG00000174574 | AKIRIN1     | -3,2     | 0,69        |
| ENSG00000104529 | EEF1D       | -3,2     | 0,7         |
| ENSG00000140525 | FANCI       | -3,2     | 0,56        |
| ENSG00000146701 | MDH2        | -3,21    | 0,59        |
| ENSG00000155903 | RASA2       | -3,21    | 0,51        |
| ENSG00000104671 | DCTN6       | -3,22    | 0,69        |
| ENSG00000160255 | ITGB2       | -3,22    | 0,53        |
| ENSG00000110079 | MS4A4A      | -3,23    | 0,33        |
| ENSG00000166068 | SPRED1      | -3,23    | 0,22        |
| ENSG00000122417 | ODF2L       | -3,24    | 0,45        |
| ENSG00000125818 | PSMF1       | -3,25    | 0,73        |
| ENSG00000139289 | PHLDA1      | -3,26    | 0,26        |
| ENSG00000187116 | LILRA5      | -3,27    | 0,56        |
| ENSG00000198799 | LRIG2       | -3,3     | 0,63        |
| ENSG00000159958 | TNFRSF13C   | -3,3     | 0,32        |



| ensembl gene    | gene symbol | Score(d) | Fold Change |
|-----------------|-------------|----------|-------------|
| ENSG00000213020 | ZNF611      | -3,31    | 0,47        |
| ENSG00000196712 | NF1         | -3,32    | 0,51        |
| ENSG00000198081 | ZBTB14      | -3,32    | 0,51        |
| ENSG00000196236 | XPNPEP3     | -3,33    | 0,61        |
| ENSG00000173166 | RAPH1       | -3,34    | 0,18        |
| ENSG00000129538 | RNASE1      | -3,35    | 0,27        |
| ENSG00000140022 | STON2       | -3,35    | 0,38        |
| ENSG00000139687 | RB1         | -3,36    | 0,39        |
| ENSG00000219626 | FAM228B     | -3,38    | 0,58        |
| ENSG00000068971 | PPP2R5B     | -3,38    | 0,62        |
| ENSG00000205497 | OR51A4      | -3,42    | 0,52        |
| ENSG00000116668 | SWT1        | -3,43    | 0,48        |
| ENSG00000100564 | PIGH        | -3,49    | 0,65        |
| ENSG00000165028 | NIPSNAP3B   | -3,52    | 0,33        |
| ENSG00000181631 | P2RY13      | -3,52    | 0,39        |
| ENSG00000132003 | ZSWIM4      | -3,52    | 0,57        |
| ENSG00000107669 | ATE1        | -3,53    | 0,66        |
| ENSG00000136869 | TLR4        | -3,53    | 0,49        |
| ENSG00000181381 | DDX60L      | -3,55    | 0,46        |
| ENSG00000157869 | RAB28       | -3,58    | 0,55        |
| ENSG00000117020 | AKT3        | -3,61    | 0,21        |
| ENSG00000233822 | HIST1H2BN   | -3,62    | 0,53        |
| ENSG00000134243 | SORT1       | -3,62    | 0,24        |
| ENSG00000205659 | LIN52       | -3,72    | 0,53        |
| ENSG00000133800 | LYVE1       | -3,75    | 0,22        |
| ENSG00000072121 | ZFYVE26     | -3,76    | 0,65        |
| ENSG00000160094 | ZNF362      | -3,76    | 0,66        |
| ENSG00000119616 | FCF1        | -3,79    | 0,63        |
| ENSG00000254598 | CSNK2A3     | -3,83    | 0,55        |
| ENSG00000128218 | VPREB3      | -3,83    | 0,12        |
| ENSG00000241058 | NSUN6       | -3,9     | 0,51        |
| ENSG00000008226 | DLEC1       | -3,92    | 0,51        |
| ENSG00000144791 | LIMD1       | -3,96    | 0,43        |
| ENSG00000136715 | SAP130      | -3,97    | 0,46        |
| ENSG00000078747 | ITCH        | -4,01    | 0,78        |
| ENSG00000131100 | ATP6V1E1    | -4,19    | 0,52        |
| ENSG00000197980 | LEKR1       | -4,25    | 0,54        |
| ENSG00000139318 | DUSP6       | -4,45    | 0,27        |
| ENSG00000006468 | ETV1        | -4,46    | 0,07        |
| ENSG00000119688 | ABCD4       | -4,6     | 0,58        |
| ENSG00000119669 | IRF2BPL     | -4,73    | 0,55        |
| ENSG00000119711 | ALDH6A1     | -4,84    | 0,39        |
| ENSG00000119650 | IFT43       | -4,85    | 0,55        |
| ENSG00000139132 | FGD4        | -5,26    | 0,19        |

**Supplementary Table S4.** List of the significantly enriched Annotation Clusters for the 628 differentially expressed protein coding genes (Enrichment Score >1.3) by DAVID 6.8 Bioinformatics tool.

|                      | GO Term                                                                                                                    | Count | P-Value | Fold Enrichment | Enrichment Score | Genes                                                                                                                                                                                                                                                                                                                                                                                                                                                                                                                                                                                                                                                                                                                                                                                                                                                                                                                                                                                                                                                                                                                                                                  |
|----------------------|----------------------------------------------------------------------------------------------------------------------------|-------|---------|-----------------|------------------|------------------------------------------------------------------------------------------------------------------------------------------------------------------------------------------------------------------------------------------------------------------------------------------------------------------------------------------------------------------------------------------------------------------------------------------------------------------------------------------------------------------------------------------------------------------------------------------------------------------------------------------------------------------------------------------------------------------------------------------------------------------------------------------------------------------------------------------------------------------------------------------------------------------------------------------------------------------------------------------------------------------------------------------------------------------------------------------------------------------------------------------------------------------------|
| Annotation Cluster 1 | GO:0044212~transcription regulatory region DNA binding                                                                     | 40    | 0,005   | 1,560           | 2,208            | RB1, CEBPD, MAX, CHD4, ARRB1, NR3C1, BARX2, IKZF4, ELK4, WNT11, ERBB4, KANSL1L, PATZ1, ZIK1, OSR2, ZNF660, KLF12, ZBTB14, LMO4, SNAI3, FOXJ2, FOXJ1, ETV1, SOX12, PAX5, KLF15, POU5F1, GATAD2B, FOSL1, CREB1, IRF3, NFIC, IRF2, MYF6, ZNF713, ZNF513, TAF5, PPARA, SSBP3, ZNF431                                                                                                                                                                                                                                                                                                                                                                                                                                                                                                                                                                                                                                                                                                                                                                                                                                                                                       |
| Annotation Cluster 2 | GO:0043167~ion binding                                                                                                     | 155   | 0,012   | 1,17            | 1,883            | ZBTB25, ACSM1, CBLB, MT1X, NR3C1, IKZF4, ZDBF2, NUDT11, RIMS2, RIMS1, ZFYVE26, ANPEP, FNTB, POGZ, CHP2, ACVR1, CSGALNACT1, OSR2, ZNF440, ARSA, PIAS3, ZNF705D, LMO4, ZNF160, APLP1, ZBTB37, EPDR1, ZNF99, SDHC, CYBA, TNNI3K, PIAS2, PPA2, PLA2G10, ZNF713, STEAP1, ZNF433, ZNF431, ZNF274, MTMR3, ARL3, DTX1, AGAP1, LPO, DTX3, ZNF24, CYP4F22, NID1, TRHDE, NUAKE2, ZMAT1, DNAJC21, HMOX1, PATZ1, ZSCAN16, ZBED3, ZNF660, JAG1, ZBTB14, PHF10, SNAI3, PCDH20, ZBTB10, LNPEP, FBXO30, TIMM10B, ZFP69, EHD3, SESTD1, DCHS2, CD209, NF1, ZNF410, RNF220, RERE, CPM, ZCCHC11, MCTP1, BNC1, FKBP14, ITGB2, ACSM2A, CHD4, LIMD1, WDR45, FARS2, IRF2BPL, ADGRE2, ING2, MMP26, ENOSF1, REV3L, ITGAX, ARIH2, OIT3, IDH3A, RSPRY1, ZIK1, KLF12, ZNF362, ZHX2, TRIM62, GGPS1, PDE4C, ATRX, CTDSPL, TBC1D9, KLF15, VCAN, PITPNM2, RASA2, TRIM58, RHOU, ZNF513, ZNF780A, PPARA, PAPP2, PPARD, PRPS2, RNF32, TRIM50, ATP10D, KCNA4, NLRC4, THBS1, CXXC4, FGD4, ABLIM3, ZNF589, ZSWIM4, UGT1A6, TSNA, CGREF1, GSN, ANKIB1, ZNF580, USP21, SUSD1, HIP1R, PLEKHA5, ZIC4, CDC42BPA, GATAD2B, TMPPE, SH3RF2, PIKFYVE, TEC, XPNPEP3, APOC1, LPCAT2, CHPT1, ZNF611, FOLR2, ZNF214, ZNF852 |
| Annotation Cluster 3 | GO:1903214~regulation of protein targeting to mitochondrion                                                                | 10    | 0,004   | 3,210           | 1,859            | BNIP3L, GPR26, ABLIM3, GLS2, ITGAX, ARIH2, SNIP1, RHOU, KCNN3, ZBED3                                                                                                                                                                                                                                                                                                                                                                                                                                                                                                                                                                                                                                                                                                                                                                                                                                                                                                                                                                                                                                                                                                   |
| Annotation Cluster 4 | GO:0001228~transcriptional activator activity, RNA polymerase II transcription regulatory region sequence-specific binding | 19    | 0,009   | 1,935           | 1,731            | OSR2, CEBPD, ONECUT1, FOXJ2, FOXJ1, ETV1, SOX12, PAX5, NR3C1, KLF15, BARX2, FOSL1, CREB1, NFIC, IRF2, MYF6, PATZ1, PPARA, SSBP3                                                                                                                                                                                                                                                                                                                                                                                                                                                                                                                                                                                                                                                                                                                                                                                                                                                                                                                                                                                                                                        |

|                      | GO Term                                                                                  | Count | P-Value | Fold Enrichment | Enrichment Score | Genes                                                                                                                                  |
|----------------------|------------------------------------------------------------------------------------------|-------|---------|-----------------|------------------|----------------------------------------------------------------------------------------------------------------------------------------|
| Annotation Cluster 5 | GO:0042089~cytokine biosynthetic process                                                 | 9     | 0,016   | 2,755           | 1,655            | ERRFI1, IRF3, PTAFR, CD28, HMOX1, FOXJ1, TNFRSF13C, THBS1, TLR4                                                                        |
| Annotation Cluster 6 | GO:0000978~RNA polymerase II core promoter proximal region sequence-specific DNA binding | 20    | 0,011   | 1,865           | 1,521            | CEBPD, MAX, SNAI3, FOXJ2, FOXJ1, ETV1, CHD4, PAX5, NR3C1, GATAD2B, FOSL1, CREB1, IRF3, NFIC, MYF6, ZNF713, PATZ1, PPARA, SSBP3, ZNF431 |
| Annotation Cluster 7 | GO:0048002~antigen processing and presentation of peptide antigen                        | 12    | 0,027   | 2,114           | 1,469            | DCTN6, FCER1G, CD209, DCTN3, LNPEP, CYBA, ABCB9, PSMF1, CTSD, HLA-DQA2, HLA-DRB1, LGMN                                                 |
| Annotation Cluster 8 | GO:0090316~positive regulation of intracellular protein transport                        | 16    | 0,016   | 1,970           | 1,329            | GPR26, CHRM1, RANBP3, GLS2, POU5F1, MYO1C, ABLIM3, ERBB4, ITGAX, CHP2, ARIH2, SNIP1, RHOU, KCNN3, TLR4, ZBED3                          |

**Supplementary Table S5.** List of positively (red) or negatively (blue) enriched gene sets in pPCL with t(11;14) compared to MM cases with t(11;14), by GSEA analysis on pre-ranked 628 protein coding gene list. Gene sets (version 7.1) are selected according to nominal p-value (<0.05), and ordered according to Normalized Enrichment Score (NES) in each gene set collection. Size, NES, Nominal p-value, and FDR q-value are reported for each gene set.

| NAME                                                                                                       | SIZE | NES     | NOM p-val | FDR q-val |
|------------------------------------------------------------------------------------------------------------|------|---------|-----------|-----------|
| <b>HALLMARK</b>                                                                                            |      |         |           |           |
| HALLMARK_IL2_STAT5_SIGNALING                                                                               | 9    | 1,741   | 0,043     | 0,119     |
| HALLMARK_ANDROGEN_RESPONSE                                                                                 | 5    | 1,576   | 0,026     | 0,177     |
| <b>REACTOME</b>                                                                                            |      |         |           |           |
| REACTOME_CELL_CYCLE_MITOTIC                                                                                | 15   | -2,346  | 0,000     | 0,000     |
| REACTOME_CELL_CYCLE                                                                                        | 16   | -2,199  | 0,000     | 0,020     |
| REACTOME_DISEASES_OF_SIGNAL_TRANSDUCTION_BY_GROWTH_FACTOR_RECEPTORS_AND_SECOND_MESSENGERS                  | 17   | -1,973  | 0,016     | 0,032     |
| <b>KEGG</b>                                                                                                |      |         |           |           |
| <b>C2-Gene Perturbations gene sets selected for "Multiple Myeloma" term</b>                                |      |         |           |           |
| MOREAUX_MULTIPLE_MYELOMA_BY_TACI_UP                                                                        | 17   | -2,1089 | 0         | 0.094     |
| <b>Gene Ontology (GO): Biological Process (BP), Cellular Component (CC), molecular function (MF) terms</b> |      |         |           |           |
| GOBP_NEGATIVE_REGULATION_OF_INTRACELLULAR_SIGNAL_TRANSDUCTION                                              | 28   | -2,646  | 0,000     | 0.0       |
| GOBP_POSITIVE_REGULATION_OF_IMMUNE_SYSTEM_PROCESS                                                          | 46   | -2,506  | 0,000     | 0.008     |
| GOBP_MAPK_CASCADE                                                                                          | 29   | -2,342  | 0,000     | 0.059     |
| GOBP_REGULATION_OF_PHOSPHORUS_METABOLIC_PROCESS                                                            | 49   | -2,340  | 0,000     | 0.047     |
| GOBP_REGULATION_OF_INTRACELLULAR_SIGNAL_TRANSDUCTION                                                       | 61   | -2,326  | 0,000     | 0.041     |
| GOBP_NEGATIVE_REGULATION_OF_CELL_DIFFERENTIATION                                                           | 20   | -2,325  | 0,000     | 0.035     |
| GOBP_REGULATION_OF_IMMUNE_SYSTEM_PROCESS                                                                   | 54   | -2,276  | 0,000     | 0.035     |
| GOBP_NEGATIVE_REGULATION_OF_DEVELOPMENTAL_PROCESS                                                          | 29   | -2,275  | 0,000     | 0.031     |
| GOBP_POSITIVE_REGULATION_OF_IMMUNE_RESPONSE                                                                | 31   | -2,265  | 0,000     | 0.032     |
| GOBP_REGULATION_OF_CELL_ACTIVATION                                                                         | 27   | -2,173  | 0,000     | 0.043     |
| GOBP_ACTIVATION_OF_IMMUNE_RESPONSE                                                                         | 27   | -2,115  | 0,000     | 0.060     |
| GOBP_REGULATION_OF_RESPONSE_TO_EXTERNAL_STIMULUS                                                           | 32   | -2,109  | 0,000     | 0.057     |
| GOBP_IMMUNE_RESPONSE_REGULATING_SIGNALING_PATHWAY                                                          | 20   | -2,100  | 0,000     | 0.055     |
| GOBP_REGULATION_OF_MAPK_CASCADE                                                                            | 26   | -2,064  | 0,000     | 0.066     |
| GOBP_POSITIVE_REGULATION_OF_PHOSPHORUS_METABOLIC_PROCESS                                                   | 28   | -2,012  | 0,016     | 0.081     |
| GOBP_REGULATION_OF_CELL_CELL_ADHESION                                                                      | 15   | -1,968  | 0,000     | 0.102     |
| GOBP_REGULATION_OF_PROTEIN_PHOSPHORYLATION                                                                 | 35   | -1,965  | 0,000     | 0.101     |
| GOBP_REGULATION_OF_TRANSFERASE_ACTIVITY                                                                    | 31   | -1,960  | 0,000     | 0.101     |
| GOBP_REGULATION_OF_ANATOMICAL_STRUCTURE_MORPHOGENESIS                                                      | 26   | -1,925  | 0,015     | 0.119     |
| GOBP_REGULATION_OF_PROTEIN_KINASE_ACTIVITY                                                                 | 24   | -1,913  | 0,000     | 0.125     |
| GOBP_REGULATION_OF_LYMPHOCYTE_ACTIVATION                                                                   | 16   | -1,908  | 0,000     | 0.126     |
| GOBP_DEFENSE_RESPONSE                                                                                      | 52   | -1,903  | 0,014     | 0.124     |
| GOBP_LEUKOCYTE_CELL_CELL_ADHESION                                                                          | 15   | -1,901  | 0,018     | 0.124     |
| GOBP_REGULATION_OF_IMMUNE_RESPONSE                                                                         | 35   | -1,897  | 0,000     | 0.122     |

| NAME                                                          | SIZE      | NES          | NOM p-val    | FDR q-val  |
|---------------------------------------------------------------|-----------|--------------|--------------|------------|
| GOBP_POSITIVE_REGULATION_OF_CELL_POPULATION_PROLIFERATION     | 31        | -1,895       | 0,000        | 0.121      |
| GOBP_NEGATIVE_REGULATION_OF_RESPONSE_TO_STIMULUS              | 61        | -1,861       | 0,015        | 0.150      |
| GOBP_POSITIVE_REGULATION_OF_RESPONSE_TO_EXTERNAL_STIMULUS     | 19        | -1,854       | 0,020        | 0.147      |
| GOBP_NEURON_DIFFERENTIATION                                   | 44        | -1,836       | 0,000        | 0.152      |
| GOBP_REGULATION_OF_DEFENSE_RESPONSE                           | 22        | -1,809       | 0,019        | 0.174      |
| GOCC_MICROTUBULE_ORGANIZING_CENTER                            | 25        | -1,806       | 0,000        | 0.171      |
| GOBP_NEUROGENESIS                                             | 53        | -1,797       | 0,000        | 0.177      |
| GOBP_DEFENSE_RESPONSE_TO_OTHER_ORGANISM                       | 34        | -1,796       | 0,017        | 0.176      |
| GOBP_LEUKOCYTE_PROLIFERATION                                  | 15        | -1,771       | 0,030        | 0.186      |
| GOBP_POSITIVE_REGULATION_OF_INTRACELLULAR_SIGNAL_TRANSDUCTION | 32        | -1,767       | 0,016        | 0.181      |
| GOBP_REGULATION_OF_RESPONSE_TO_STRESS                         | 43        | -1,766       | 0,016        | 0.178      |
| GOBP_NEGATIVE_REGULATION_OF_CATALYTIC_ACTIVITY                | 26        | -1,759       | 0,015        | 0.176      |
| GOBP_POSITIVE_REGULATION_OF_PROTEIN_MODIFICATION_PROCESS      | 27        | -1,751       | 0,033        | 0.177      |
| GOBP_INNATE_IMMUNE_RESPONSE                                   | 31        | -1,750       | 0,015        | 0.175      |
| GOBP_ANATOMICAL_STRUCTURE_HOMEOSTASIS                         | 16        | -1,747       | 0,032        | 0.177      |
| GOBP_CYTOKINE_PRODUCTION                                      | 28        | -1,745       | 0,031        | 0.175      |
| GOBP_PROTEIN_PHOSPHORYLATION                                  | 48        | -1,737       | 0,000        | 0.179      |
| GOBP_POSITIVE_REGULATION_OF_TRANSFERASE_ACTIVITY              | 19        | -1,732       | 0,034        | 0.180      |
| GOBP_CELL_MIGRATION                                           | 56        | -1,731       | 0,030        | 0.178      |
| GOBP_RESPONSE_TO_CYTOKINE                                     | 33        | -1,730       | 0,000        | 0.176      |
| GOBP_NEURON_DEVELOPMENT                                       | 32        | -1,725       | 0,034        | 0.180      |
| GOBP_CELL_MORPHOGENESIS                                       | 28        | -1,718       | 0,016        | 0.179      |
| GOBP_INFLAMMATORY_RESPONSE                                    | 26        | -1,713       | 0,031        | 0.181      |
| GOMF_PHOSPHOLIPID_BINDING                                     | 24        | -1,702       | 0,033        | 0.191      |
| GOBP_POSITIVE_REGULATION_OF_CELL_DEATH                        | 26        | -1,671       | 0,029        | 0.214      |
| GOBP_REGULATION_OF_VESICLE_MEDIATED_TRANSPORT                 | 21        | -1,665       | 0,016        | 0.215      |
| GOCC_CENTROSOME                                               | 17        | -1,655       | 0,050        | 0.221      |
| GOCC_CELL_LEADING_EDGE                                        | 19        | -1,653       | 0,046        | 0.221      |
| GOBP_CELL_CELL_ADHESION                                       | 24        | -1,652       | 0,000        | 0.219      |
| GOBP_CIRCULATORY_SYSTEM_DEVELOPMENT                           | 38        | -1,626       | 0,000        | 0.232      |
| GOBP_REGULATION_OF_RESPONSE_TO_BIOTIC_STIMULUS                | 15        | -1,621       | 0,049        | 0.231      |
| GOBP_POSITIVE_REGULATION_OF_PROTEIN_PHOSPHORYLATION           | 17        | -1,603       | 0,036        | 0.240      |
| GOBP_POSITIVE_REGULATION_OF_MAPK_CASCADE                      | 19        | -1,597       | 0,016        | 0.24       |
| GOMF_ENZYME_BINDING                                           | 70        | -1,591       | 0,043        | 0.24       |
| <b>GOBP_CHEMICAL_HOMEOSTASIS</b>                              | <b>29</b> | <b>2,162</b> | <b>0,000</b> | <b>0.0</b> |

**Supplementary Table S6.** Selected gene sets (shown in Figure 2) obtained using Gene Set Enrichment Analysis on the list of 628 DE protein-coding genes that were ranked based on fold change values (NES >1.5 or < -1.5; p-value <0.05, NES: Normalized Enrichment Score).

| NAME                                                      | SIZE | NES   | NOM<br>p-val | gene list*                                                                                                                                                                                                                              |
|-----------------------------------------------------------|------|-------|--------------|-----------------------------------------------------------------------------------------------------------------------------------------------------------------------------------------------------------------------------------------|
| GOBP_REGULATION_OF<br>_CELL_CELL_ADHESION                 | 15   | -1.96 | 0.000        | FOXJ1, HLA-DRB1, LAPTM5, <b>CD28, VSIG4, PDCD1LG2, CD209, PTAFR, DTX1, PPARA, SOX12, JAG1, CBLB, ITGB2, TNFRSF13C</b>                                                                                                                   |
| GOBP_REGULATION_OF<br>_RESPONSE_TO_EXTERN<br>AL_STIMULUS  | 32   | -2.10 | 0.0000       | MICA, S1PR1, PPARD, IRF3, LGMN, <b>THBS1, HLA-DRB1, SEC14L1, ZNF580, NLRC4, MMP26, CYBA, CD28, VSIG4, FNTB, PLCG2, CD209, TYROBP, FCER1G, PDGFD, PPARA, UBE2K, MCPH1, CSF1R, AKIRIN1, PSMF1, LILRA5, LRIG2, RB1, ZSWIM4, TLR4, ITCH</b> |
| GOBP_NEGATIVE_REGU<br>LATION_OF_CELL_DIFFE<br>RENTIATIONE | 20   | -2.32 | 0.0000       | INSIG1, FOXJ1, TMEM98, PPARD, PIAS3, C1QC, ZHX2, TRIM62, <b>DTX1, PPARA, JAG1, MED28, FOXJ2, AKIRIN1, SPRED1, NF1, RB1, TLR4, SORT1, LIMD1</b>                                                                                          |
| REACTOME_CELL_CYCLE<br>_MITOTIC                           | 15   | -2.34 | 0.0000       | DCTN3, NCAPG, OFD1, HAUS1, POLD4, <b>PPP2R2D, MCPH1, MAX, CDC25B, PSMF1, PHLDA1, RB1, PPP2R5B, AKT3, LIN52</b>                                                                                                                          |
| HALLMARK_IL2_STATS_<br>SIGNALING                          | 9    | 1.74  | 0.0425       | <b>EEF1AKMT1, APLP1, ODC1, AMACR, MYO1C, IKZF4, SLC2A3, IGF1R, PHLDA1</b>                                                                                                                                                               |
| MOREAUX_MULTIPLE_<br>MYELOMA_BY_TACI_UP                   | 17   | -2.11 | 0.0000       | REM1, IKZF4, LBH, CEP170B, KIAA0586, PLEKHA5, HYI, <b>ARHGAP44, SOX12, TCEAL2, BTN1A1, ARRB1, VASP, NF1, RNASE1, ZNF362, ETV1</b>                                                                                                       |

\* Core Enrichment genes are shown in bold

**Supplementary Table S7.** List of 31 differentially expressed lncRNAs in 15 pPCL compared to 50 MM cases, by SAM analysis at q-value=0. Transcripts are ordered according to SAM (d) score.

| ensembl gene*   | lncRNA        | Score(d) | Fold Change |
|-----------------|---------------|----------|-------------|
| ENSG00000282033 | RP11-506F3.1  | 5,79     | 1,81        |
| ENSG00000235531 | MSC-AS1       | 5,23     | 3,11        |
| ENSG00000248773 | RP11-231L11.3 | 4,02     | 2,65        |
| ENSG00000259287 | AC010809.1    | -4,87    | 0,36        |
| ENSG00000229228 | LINC00582     | -4,74    | 0,25        |
| ENSG00000236901 | MIR600HG      | -4,57    | 0,38        |
| ENSG00000248980 | AC019163.1    | -4,24    | 0,62        |
| ENSG00000259291 | RP11-617F23.1 | -4,14    | 0,44        |
| ENSG00000268751 | SCGB1B2P      | -3,82    | 0,62        |
| ENSG00000243276 | RP11-384F7.1  | -3,62    | 0,43        |
| ENSG00000247157 | LINC01252     | -3,45    | 0,43        |
| ENSG00000232884 | AF127936.3    | -3,42    | 0,25        |
| ENSG00000259408 | RP11-3D4.3    | -3,39    | 0,61        |
| ENSG00000244513 | CTD-2013N24.2 | -3,33    | 0,63        |
| ENSG00000241525 | AC108004.3    | -3,24    | 0,51        |
| ENSG00000236051 | MYCBP2-AS1    | -3,23    | 0,52        |
| ENSG00000255183 | RP11-720D4.3  | -3,23    | 0,26        |
| ENSG00000253686 | LINC01484     | -3,20    | 0,33        |
| ENSG00000223381 | RP11-655H13.2 | -3,20    | 0,80        |
| ENSG00000257151 | PWAR6         | -3,20    | 0,48        |
| ENSG00000224626 | AC106053.1    | -3,18    | 0,52        |
| ENSG00000276759 | RP11-80I3.1   | -3,18    | 0,25        |
| ENSG00000263327 | TAPT1-AS1     | -3,15    | 0,38        |
| ENSG00000247774 | PCED1B-AS1    | -3,14    | 0,28        |
| ENSG00000237513 | RP11-325F22.2 | -3,14    | 0,42        |
| ENSG00000225218 | AP001628.6    | -3,11    | 0,69        |
| ENSG00000258474 | RP11-187E13.1 | -3,10    | 0,80        |
| ENSG00000253315 | CTB-11I22.2   | -3,00    | 0,77        |
| ENSG00000255310 | AF131215.2    | -2,99    | 0,50        |
| ENSG00000249096 | LINC02362     | -2,94    | 0,34        |
| ENSG00000235127 | AC068286.1    | -2,93    | 0,72        |

\* Red colored ensembl genes are those in common with the 38-list of differentially expressed lncRNAs between MM and pPCL with t(11;14).

**Supplementary Table S8.** Ensembl Annotation (GRCh38.p13) of top 33 DE lncRNAs differentially expressed lncRNAs in 7 t(11;14)-pPCL compared to 12 t(11;14)-MM cases, by SAM analysis at q-value=0. Transcripts are ordered according to SAM (d) score.

| Gene stable ID  | Gene name          | Score(d) | Fold Change | Description                                                                        | Chr. | start (bp) | end (bp)  | Strand |
|-----------------|--------------------|----------|-------------|------------------------------------------------------------------------------------|------|------------|-----------|--------|
| ENSG00000197989 | <b>SNHG12</b>      | 5,19     | 2,178365    | small nucleolar RNA host gene 12<br>[Source:HGNC Symbol;Acc:HGNC:30062]            | 1    | 28578538   | 28583132  | -1     |
| ENSG00000227912 | <b>AL441943.2</b>  | 4,76     | 1,682956    | novel transcript (FLJ31539)                                                        | 10   | 2150480    | 2169460   | 1      |
| ENSG00000245910 | <b>SNHG6</b>       | 4,63     | 6,527392    | small nucleolar RNA host gene 6<br>[Source:HGNC Symbol;Acc:HGNC:32965]             | 8    | 66921684   | 66926398  | -1     |
| ENSG00000253524 | <b>AC124290.2</b>  | -3,63    | 0,184553    | novel transcript                                                                   | 8    | 36004316   | 36095046  | -1     |
| ENSG00000177406 | <b>NINJ2-AS1</b>   | -3,64    | 0,545158    | NINJ2 antisense RNA 1 [Source:HGNC Symbol;Acc:HGNC:40405]                          | 12   | 630858     | 664196    | 1      |
| ENSG00000258757 | <b>AL133453.1</b>  | -3,68    | 0,465076    | novel transcript, antisense to ERO1L                                               | 14   | 52640839   | 52641566  | 1      |
| ENSG00000272189 | <b>AL024508.1</b>  | -3,71    | 0,695147    | novel transcript, antisense to MAP7                                                | 6    | 136550661  | 136552554 | 1      |
| ENSG00000234684 | <b>SDCBP2-AS1</b>  | -3,73    | 0,544211    | SDCBP2 antisense RNA 1 [Source:HGNC Symbol;Acc:HGNC:44314]                         | 20   | 1325405    | 1378735   | 1      |
| ENSG00000224220 | <b>DTNB-AS1</b>    | -3,73    | 0,243588    | DTNB antisense RNA 1 [Source:HGNC Symbol;Acc:HGNC:40198]                           | 2    | 25421117   | 25427643  | 1      |
| ENSG00000225655 | <b>BX255923.1</b>  | -3,78    | 0,556919    | novel transcript                                                                   | 9    | 41073710   | 41076392  | 1      |
| ENSG00000270069 | <b>MIR222HG</b>    | -3,79    | 0,117648    | miR222/221 cluster host gene [Source:HGNC Symbol;Acc:HGNC:49555]                   | X    | 45745211   | 45770274  | -1     |
| ENSG00000240875 | <b>LINC00886</b>   | -3,79    | 0,44795     | long intergenic non-protein coding RNA 886<br>[Source:HGNC Symbol;Acc:HGNC:48572]  | 3    | 156747343  | 156817062 | -1     |
| ENSG00000236144 | <b>TMEM147-AS1</b> | -3,85    | 0,437088    | TMEM147 antisense RNA 1 [Source:HGNC Symbol;Acc:HGNC:51273]                        | 19   | 35540738   | 35546029  | -1     |
| ENSG00000257759 | <b>AL357153.2</b>  | -3,86    | 0,430814    | novel transcript                                                                   | 14   | 70425812   | 70547464  | -1     |
| ENSG00000229502 | <b>AL391863.1</b>  | -3,86    | 0,404444    | novel transcript                                                                   | 6    | 157872571  | 157875210 | -1     |
| ENSG00000245534 | <b>RORA-AS1</b>    | -3,93    | 0,439143    | RORA antisense RNA 1 [Source:HGNC Symbol;Acc:HGNC:51410]                           | 15   | 60479152   | 60630637  | 1      |
| ENSG00000247081 | <b>BAALC-AS1</b>   | -3,95    | 0,514999    | BAALC antisense RNA 1 [Source:HGNC Symbol;Acc:HGNC:50461]                          | 8    | 103153394  | 103298772 | -1     |
| ENSG00000253948 | <b>VPS13B-DT</b>   | -3,99    | 0,390776    | VPS13B divergent transcript [Source:HGNC Symbol;Acc:HGNC:54375]                    | 8    | 98958277   | 99013743  | -1     |
| ENSG00000269391 | <b>AC010139.1</b>  | -4,09    | 0,536944    | novel transcript                                                                   | 3    | 16524800   | 16531807  | 1      |
| ENSG00000234361 | <b>AL391863.2</b>  | -4,09    | 0,410476    | novel transcript                                                                   | 6    | 157829143  | 157830573 | -1     |
| ENSG00000232613 | <b>LINC02576</b>   | -4,12    | 0,10995     | long intergenic non-protein coding RNA 2576<br>[Source:HGNC Symbol;Acc:HGNC:53748] | 2    | 65030727   | 65053017  | 1      |
| ENSG00000255949 | <b>RPS6KB2-AS1</b> | -4,14    | 0,562092    | RPS6KB2 antisense RNA 1 [Source:HGNC Symbol;Acc:HGNC:53744]                        | 11   | 67431367   | 67435399  | -1     |
| ENSG00000223642 | <b>AC008277.1</b>  | -4,17    | 0,499357    | novel transcript, antisense to BAZ2B                                               | 2    | 159386367  | 159404636 | 1      |
| ENSG00000179406 | <b>LINC00174</b>   | -4,18    | 0,443413    | long intergenic non-protein coding RNA 174<br>[Source:HGNC Symbol;Acc:HGNC:27788]  | 7    | 66376044   | 66493566  | -1     |
| ENSG00000247092 | <b>SNHG10</b>      | -4,18    | 0,480974    | small nucleolar RNA host gene 10<br>[Source:HGNC Symbol;Acc:HGNC:27510]            | 14   | 95521943   | 95534889  | -1     |
| ENSG00000253686 | <b>LINC01484</b>   | -4,19    | 0,095893    | long intergenic non-protein coding RNA 1484<br>[Source:HGNC Symbol;Acc:HGNC:51136] | 5    | 173707614  | 173746279 | -1     |



| Gene stable ID  | Gene name         | Score(d) | Fold<br>Change | Description                                                                          | Chr. | start (bp) | end (bp) | Strand |
|-----------------|-------------------|----------|----------------|--------------------------------------------------------------------------------------|------|------------|----------|--------|
| ENSG00000257453 | <b>AC011611.3</b> | -4,29    | 0,33742        | novel transcript, antisense to PHLDA1                                                | 12   | 76030494   | 76031378 | 1      |
| ENSG00000224972 | <b>AL513412.1</b> | -4,32    | 0,511749       | novel transcript                                                                     | 9    | 6902670    | 6978859  | 1      |
| ENSG00000236723 | <b>AL606760.2</b> | -4,38    | 0,550533       | novel transcript, antisense to CPT2                                                  | 1    | 53209783   | 53213775 | -1     |
| ENSG00000282851 | <b>BISPR</b>      | -4,67    | 0,476566       | BST2 interferon stimulated positive regulator<br>[Source:HGNC Symbol;Acc:HGNC:51290] | 19   | 17405686   | 17419324 | 1      |
| ENSG00000251323 | <b>LINC02728</b>  | -4,86    | 0,402352       | long intergenic non-protein coding RNA 2728<br>[Source:HGNC Symbol;Acc:HGNC:54245]   | 11   | 78423982   | 78429836 | -1     |
| ENSG00000232455 | <b>LARS2-AS1</b>  | -4,88    | 0,518806       | LARS2 antisense RNA 1 [Source:HGNC<br>Symbol;Acc:HGNC:40796]                         | 3    | 45483974   | 45509545 | -1     |
| ENSG00000251364 | <b>AC107884.1</b> | -4,95    | 0,318859       | novel transcript, antisense to OLFML1                                                | 11   | 7418826    | 7513644  | -1     |

**Supplementary Table S9.** Results of Pearson's correlation between the expression levels of the 33 lncRNAs and the overlapping/nearby transcripts globally profiled in 774 MM CoMMpass cohort. In bold, those lncRNA-gene pairs with at least 0.5 significant Pearson's correlation. BH adjustment was applied.

| lncRNA Gene ID  | lncRNA Gene Name  | overlapping/nearby Gene ID | overlapping/nearby Gene Name | Pearson's Correlation#           | biotype* |
|-----------------|-------------------|----------------------------|------------------------------|----------------------------------|----------|
| ENSG00000177406 | NINJ2-AS1         | ENSG00000171840            | NINJ2                        | r=0.24, q-value =3.6E-11         | PC       |
|                 |                   | ENSG00000256020            | AC006205.2                   | r=0.05, q-value =0.132           | lncRNA   |
|                 |                   | ENSG00000238370            | RNU7-103P                    | r=0.009, q-value =0.8            | snRNA    |
|                 |                   | ENSG00000255825            | AC006205.1                   | r=0.098, q-value =0.009          | lncRNA   |
|                 |                   | ENSG00000256672            | LINC02455                    | r=0.20, q-value =1.52E-8         | lncRNA   |
| ENSG00000179406 | LINC00174         | ENSG00000169902            | TPST1                        | r=0.03, q-value =0.492           | PC       |
|                 |                   | ENSG00000252126            | RNU6-313P                    | r=0.01, q-value =0.69            | snRNA    |
|                 |                   | ENSG00000251451            | <b>GTF2IP9</b>               | <b>r=0.82, q-value =4.5E-191</b> | TUP      |
|                 |                   | ENSG00000231234            | <b>SKP1P1</b>                | <b>r=0.51, q-value =6.8E-53</b>  | TPP      |
|                 |                   | ENSG00000237310            | GS1-124K5.4                  | r=0.35, q-value =4.9E-24         | lncRNA   |
| ENSG00000197989 | SNHG12            | ENSG00000180198            | RCC1                         | r=0.19, q-value =1.5E-07         | PC       |
|                 |                   | ENSG00000180098            | TRNAU1AP                     | r=0.3, q-value =4.4E-17          | PC       |
|                 |                   | ENSG00000221539            | <b>SNORD99</b>               | <b>r=0.51, q-value =3.9E-52</b>  | snoRNA   |
|                 |                   | ENSG00000120656            | TAF12                        | r=0.19, q-value =1.5E-07         | PC       |
|                 |                   | ENSG00000188060            | RAB42                        | r=0.13, q-value =0.0002          | PC       |
| ENSG00000223642 | <b>AC008277.1</b> | ENSG00000123636            | <b>BAZ2B</b>                 | <b>r=0.53, q-value =1.4E-57</b>  | PC       |
| ENSG00000224220 | <b>DTNB-AS1</b>   | ENSG00000235072            | ARNILA                       | r=0.10, q-value =0.0028          | lncRNA   |
|                 |                   | ENSG00000138101            | <b>DTNB</b>                  | <b>r=0.89, q-value =4.3E-272</b> | PC       |
| ENSG00000224972 | AL513412.1        | ENSG00000107077            | KDM4C                        | r=0.30, q-value =3.5E-18         | PC       |
| ENSG00000225655 | BX255923.1        | ENSG00000276291            | FRG1HP                       | not present                      | TUP      |
|                 |                   | ENSG00000277778            | PGM5P2                       | not present                      | TUP      |
| ENSG00000227912 | AL441943.2        | ENSG00000231326            | LINC02662                    | r=-0.004, q-value =0.9           | lncRNA   |
|                 |                   | ENSG00000212156            | RNU6-576P                    | r=-0.032, q-value =0.57          | snRNA    |
| ENSG00000229502 | <b>AL391863.1</b> | ENSG00000130340            | <b>SNX9</b>                  | <b>r=0.65, q-value =3.5E-95</b>  | PC       |
|                 |                   | ENSG00000234361            | <b>AL391863.2</b>            | <b>r=0.65, q-value =7.0E-93</b>  | lncRNA   |
|                 |                   | ENSG00000236324            | <b>SNX9-AS1</b>              | <b>r=0.86, q-value =8.7E-230</b> | lncRNA   |

| lncRNA Gene ID  | lncRNA Gene Name | overlapping/nearby Gene ID | overlapping/nearby Gene Name | Pearson's Correlation#     | biotype* |
|-----------------|------------------|----------------------------|------------------------------|----------------------------|----------|
| ENSG00000234361 | AL391863.2       | ENSG00000220867            | HSPE1P26                     | r=0.80, q-value =4.8E-165  | PP       |
|                 |                  | ENSG00000130340            | SNX9                         | r=0.58, q-value =2.4E-71   | PC       |
|                 |                  | ENSG00000229502            | AL391863.1                   | r=0.65, q-value =7.0E-93   | lncRNA   |
| ENSG00000232613 | LINC02576        | ENSG00000237638            | LINC02245                    | r=0.46, q-value =6.0E-42   | lncRNA   |
|                 |                  | ENSG00000115902            | SLC1A4                       | r=0.36, q-value =2.4E-24   | PC       |
|                 |                  | ENSG00000252892            | RNU6-548P                    | r=0.33, q-value =6.0E-21   | snRNA    |
|                 |                  | ENSG00000011523            | CEP68                        | r=0.23, q-value =1.8E-10   | PC       |
|                 |                  | ENSG00000138069            | RAB1A                        | r=0.04, q-value =0.27      | PC       |
|                 |                  | ENSG00000011376            | LARS2                        | r=0.27, q-value =1.7E-14   | PC       |
| ENSG00000232455 | LARS2-AS1        | ENSG00000144791            | LIMD1                        | r=0.37, q-value =1.0E-18   | PC       |
|                 |                  | ENSG00000244588            | RAD21L1                      | r=0.08, q-value =0.021     | PC       |
| ENSG00000234684 | SDCBP2-AS1       | ENSG00000101298            | SNPH                         | r=0.27, q-value =1.5E-14   | PC       |
|                 |                  | ENSG00000125775            | SDCBP2                       | r=- 0.19, q-value =0.0011  | PC       |
|                 |                  | ENSG00000274322            | AL136531.2                   | not present                | PC       |
|                 |                  | ENSG00000229728            | AL136531.1                   | r=0.72, q-value =1.9E-123  | lncRNA   |
|                 |                  | ENSG00000088832            | FKBP1A                       | r=0.56, q-value =1.8E-64   | PC       |
|                 |                  | ENSG00000284436            | MIR6869                      | not present                | miRNA    |
|                 |                  | ENSG00000188508            | KRTDAP                       | r=0.05, q-value =0.19      | PC       |
| ENSG00000236144 | TMEM147-AS1      | ENSG00000161249            | DMKN                         | r=0.08, q-value =0.035     | PC       |
|                 |                  | ENSG00000189001            | SBSN                         | r=0.23, q-value =1.3E-10   | PC       |
|                 |                  | ENSG00000105679            | GAPDHS                       | r=0.25, q-value =1.4E-12   | PC       |
|                 |                  | ENSG00000105677            | TMEM147                      | r=0.30, q-value =5.9E-17   | PC       |
|                 |                  | ENSG00000105675            | ATP4A                        | r=0.15, q-value =4.7E-5    | PC       |
|                 |                  | ENSG00000283907            | AD000090.1                   | not present                | lncRNA   |
|                 |                  | ENSG00000283758            | PMIS2                        | not present                | PC       |
|                 |                  | ENSG00000157184            | CPT2                         | r=- 0.23, q-value =2.1E-07 | PC       |
| ENSG00000236723 | AL606760.2       | ENSG00000162384            | CZIB                         | r=0.007, q-value =0.85     | PC       |
|                 |                  | ENSG00000259818            | CZIB-DT                      | r=- 0.03, q-value =0.50    | lncRNA   |
|                 |                  | ENSG00000162385            | MAGOH                        | r=0.08, q-value =0.06      | PC       |
|                 |                  | ENSG00000226754            | RP5-1024G6.5                 | r=- 0.007, q-value =0.85   | lncRNA   |
|                 |                  |                            |                              |                            |          |

| lncRNA Gene ID  | lncRNA Gene Name | overlapping/nearby Gene ID | overlapping/nearby Gene Name | Pearson's Correlation#           | biotype* |
|-----------------|------------------|----------------------------|------------------------------|----------------------------------|----------|
| ENSG00000240875 | LINC00886        | ENSG00000157193            | LRP8                         | r=- 0.12, q-value =0.0011        | PC       |
|                 |                  | ENSG00000163659            | TIPARP                       | r=0.11, q-value =0.0018          | PC       |
|                 |                  | ENSG00000174912            | <b>METTL15P1</b>             | <b>r=0.59, q-value =4.5E-75</b>  | PP       |
|                 |                  | ENSG00000230457            | PA2G4P4                      | r=0.32, q-value =1.1E-15         | PP       |
|                 |                  | ENSG00000197980            | LEKR1                        | r=0.40, q-value =3.2E-17         | PC       |
| ENSG00000245534 | RORA-AS1         | ENSG00000128915            | <b>ICE2</b>                  | <b>r=0.51, q-value =1.5E-38</b>  | PC       |
|                 |                  | ENSG00000069667            | RORA                         | r=0.02, q-value =0.52            | PC       |
|                 |                  | ENSG00000259274            | <b>AC107241.1</b>            | <b>r=0.59, q-value =1.0E-73</b>  | lncRNA   |
|                 |                  | ENSG00000259513            | CYCSP38                      | r=0.41, q-value =4.4E-29         | TPP      |
|                 |                  | ENSG00000273958            | AC009560.1                   | not present                      | lncRNA   |
|                 |                  | ENSG00000286457            | AC009560.3                   | not present                      | lncRNA   |
|                 |                  | ENSG00000287508            | AC009560.4                   | not present                      | lncRNA   |
| ENSG00000245910 | SNHG6            | ENSG00000178460            | MCMDC2                       | r=0.19, q-value =1.4E-07         | PC       |
|                 |                  | ENSG00000261787            | TCF24                        | r=0.017, q-value =0.63           | PC       |
|                 |                  | ENSG00000178125            | PPP1R42                      | r=- 0.02, q-value =0.63          | PC       |
| ENSG00000247081 | BAALC-AS1        | ENSG00000250929            | <b>LINC01181</b>             | <b>r=0.55, q-value =4.9E-61</b>  | lncRNA   |
|                 |                  | ENSG00000236939            | BAALC-AS2                    | r=0.22, q-value =8.9E-10         | lncRNA   |
|                 |                  | ENSG00000164929            | BAALC                        | r=- 0.001, q-value =0.98         | PC       |
|                 |                  | ENSG00000265657            | MIR3151                      | r=0.38, q-value =1.2E-28         | miRNA    |
|                 |                  | ENSG00000253851            | AC025370.1                   | r=0.07, q-value =0.065           | lncRNA   |
|                 |                  | ENSG00000164930            | <b>FZD6</b>                  | <b>r=0.84, q-value =1.5E-209</b> | PC       |
|                 |                  | ENSG00000286337            | AC025370.2                   | not present                      | lncRNA   |
| ENSG00000247092 | SNHG10           | ENSG00000176438            | SYNE3                        | r=0.02, q-value =0.49            | PC       |
|                 |                  | ENSG00000258572            | AL133467.1                   | r=0.17, q-value =1.7E-06         | lncRNA   |
|                 |                  | ENSG00000252481            | <b>SCARNA13</b>              | <b>r=0.59, q-value =4.8E-74</b>  | scaRNA   |
|                 |                  | ENSG00000182512            | GLRX5                        | r=0.41, q-value =1.4E-32         | PC       |
|                 |                  | ENSG00000258390            | LINC02318                    | r=0.26, q-value =1.4E-10         | lncRNA   |
| ENSG00000251323 | LINC02728        | ENSG00000033327            | GAB2                         | r=0.37, q-value =5.3E-12         | PC       |
|                 |                  | ENSG00000254420            | AP003086.1                   | r=0.32, q-value =1.0E-15         | lncRNA   |
|                 |                  | ENSG00000254649            | AP003086.2                   | r=0.21, q-value =2.9E-09         | lncRNA   |

| lncRNA Gene ID  | lncRNA Gene Name  | overlapping/nearby Gene ID | overlapping/nearby Gene Name | Pearson's Correlation#           | biotype* |
|-----------------|-------------------|----------------------------|------------------------------|----------------------------------|----------|
| ENSG00000251364 | <b>AC107884.1</b> | ENSG00000137513            | NARS2                        | r=0.42, q-value =1.6E-30         | PC       |
|                 |                   | ENSG00000170743            | SYT9                         | r=0.39, q-value =1.2E-29         | PC       |
|                 |                   | ENSG00000183801            | <b>OLFML1</b>                | <b>r=0.61, q-value =2.2E-79</b>  | PC       |
|                 |                   | ENSG00000166387            | PPFIBP2                      | r=0.49, q-value =3.7E-34         | PC       |
| ENSG00000253524 | AC124290.2        | ENSG00000253452            | AC124290.1                   | r=0.21, q-value =6.3E-09         | lncRNA   |
| ENSG00000253686 | <b>LINC01484</b>  | ENSG00000253959            | <b>LINC01863</b>             | <b>r=0.54, q-value =1.0E-44</b>  | lncRNA   |
|                 |                   | ENSG00000253428            | <b>LINC01942</b>             | <b>r=0.75, q-value =4.4E-139</b> | lncRNA   |
|                 |                   | ENSG00000287003            | AC008674.1                   | not present                      | lncRNA   |
|                 |                   | ENSG00000254211            | LINC01485                    | r=0.48, q-value =3.4E-45         | lncRNA   |
| ENSG00000253948 | VPS13B-DT         | ENSG00000104375            | STK3                         | r=0.22, q-value =1.2E-09         | PC       |
|                 |                   | ENSG00000271930            | AC016877.3                   | r=0.05, q-value =0,044           | lncRNA   |
|                 |                   | ENSG00000164920            | OSR2                         | r=- 0.02, q-value =0.54          | PC       |
|                 |                   | ENSG00000229625            | AC016877.1                   | r=0.12, q-value =0,00075         | lncRNA   |
|                 |                   | ENSG00000132549            | VPS13B                       | r=0.28, q-value =3.3E-15         | PC       |
| ENSG00000255949 | RPS6KB2-AS1       | ENSG00000172613            | RAD9A                        | r=0.03, q-value =0.63            | PC       |
|                 |                   | ENSG00000253024            | RNU6-1238P                   | r=- 0.08, q-value =0.18          | snRNA    |
|                 |                   | ENSG00000172531            | PPP1CA                       | r=0.06, q-value =0.32            | PC       |
|                 |                   | ENSG00000175463            | TBC1D10C                     | r=0.04, q-value =0.40            | PC       |
|                 |                   | ENSG00000172508            | CARNS1                       | r=0.02, q-value =0.69            | PC       |
|                 |                   | ENSG00000175634            | RPS6KB2                      | r=0.06, q-value =0.32            | PC       |
|                 |                   | ENSG00000213402            | PTPRCAP                      | r=0.02, q-value =0.63            | PC       |
|                 |                   | ENSG00000172725            | CORO1B                       | r=0.04, q-value =0.40            | PC       |
|                 |                   | ENSG00000175514            | GPR152                       | r=0.01, q-value =0.74            | PC       |
|                 |                   | ENSG00000175544            | CABP4                        | r=0.05, q-value =0.34            | PC       |
|                 |                   | ENSG00000172663            | TMEM134                      | r=0.01, q-value =0.71            | PC       |
|                 |                   | ENSG00000110711            | AIP                          | r=0.02, q-value =0.65            | PC       |
| ENSG00000257453 | <b>AC011611.3</b> | ENSG00000258077            | <b>AC078923.1</b>            | <b>r=0.54, q-value =9.6E-46</b>  | lncRNA   |
|                 |                   | ENSG00000139289            | <b>PHLDA1</b>                | <b>r=0.87, q-value =1.2E-233</b> | PC       |
|                 |                   | ENSG00000257839            | RP11-290L1.2                 | r=0.38, q-value =1.4E-25         | lncRNA   |
|                 |                   | ENSG00000187109            | NAP1L1                       | r=0.08, q-value =0.014           | PC       |

| lncRNA Gene ID  | lncRNA Gene Name   | overlapping/nearby Gene ID | overlapping/nearby Gene Name | Pearson's Correlation#    | biotype* |
|-----------------|--------------------|----------------------------|------------------------------|---------------------------|----------|
| ENSG00000257759 | AL357153.2         | ENSG00000133983            | COX16                        | r=0.21, q-value =5.0E-09  | PC       |
|                 |                    | ENSG00000258644            | SYNJ2BP-COX16                | r=- 0.007, q-value =0.84  | PC       |
|                 |                    | ENSG00000213463            | SYNJ2BP                      | r=0.48, q-value =9.0E-45  | PC       |
|                 |                    | ENSG00000139985            | ADAM21                       | r=0.28, q-value =4.0E-15  | PC       |
|                 |                    | ENSG00000259158            | ADAM20P1                     | r=0.34, q-value =3.3E-08  | TUP      |
|                 |                    | ENSG00000252263            | RNU6-659P                    | r=0.01, q-value =0.77     | snRNA    |
|                 |                    | ENSG00000134007            | ADAM20                       | r=0.15, q-value =3.3E-09  | PC       |
|                 |                    | ENSG00000133997            | MED6                         | r=0.22, q-value =4.2E-10  | PC       |
| ENSG00000258757 | AL133453.1         | ENSG00000180998            | GPR137C                      | r=- 0.02, q-value =0.54   | PC       |
|                 |                    | ENSG00000197930            | ERO1A                        | r=- 0.10, q-value =0.0064 | PC       |
| ENSG00000269391 | AC010139.1         | ENSG00000233570            | LINC00690                    | r=0.09, q-value =0.013    | lncRNA   |
| ENSG00000270069 | MIR222HG           | ENSG00000204915            | MFFP3                        | r=0.15, q-value =4.8E-05  | PP       |
|                 |                    | ENSG00000207870            | MIR221                       | r=0.95, q-value =0.0E-00  | miRNA    |
|                 |                    | ENSG00000207725            | MIR222                       | r=0.35, q-value =6.6E-21  | miRNA    |
|                 |                    | ENSG00000269902            | AC234772.1                   | r=0.90, q-value =5.0E-295 | lncRNA   |
| ENSG00000272189 | AL024508.1         | ENSG00000135525            | MAP7                         | r=0.55, q-value =1.6E-63  | PC       |
|                 |                    | ENSG00000271765            | RN7SKP299                    | r=0.31, q-value =2.4E-18  | misc_RNA |
|                 |                    | ENSG00000197442            | MAP3K5                       | r=0.19, q-value =1.3E-07  | PC       |
| ENSG00000282851 | BISPR <sup>#</sup> | ENSG00000130300            | PLVAP                        | -                         | PC       |
|                 |                    | ENSG00000269350            | AC010463.2                   | -                         | lncRNA   |
|                 |                    | ENSG00000269720            | CCDC194                      | -                         | PC       |
|                 |                    | ENSG00000130303            | BST2                         | -                         | PC       |
|                 |                    | ENSG00000141971            | MVB12A                       | -                         | PC       |
|                 |                    | ENSG00000269481            | AC010319.4                   | -                         | lncRNA   |
|                 |                    | ENSG00000269053            | AC010319.3                   | -                         | lncRNA   |
|                 |                    | ENSG00000188051            | TMEM221                      | -                         | PC       |
|                 |                    | ENSG00000269035            | AC010319.2                   | -                         | PC       |
|                 |                    | ENSG00000269736            | AC010319.5                   | -                         | lncRNA   |
|                 |                    | ENSG00000171773            | NXNL1                        | -                         | PC       |

| <b>lncRNA Gene ID</b> | <b>lncRNA Gene Name</b> | <b>overlapping/nearby Gene ID</b> | <b>overlapping/nearby Gene Name</b> | <b>Pearson's Correlation#</b> | <b>biotype*</b> |
|-----------------------|-------------------------|-----------------------------------|-------------------------------------|-------------------------------|-----------------|
|                       |                         | ENSG00000130304                   | SLC27A1                             | -                             | PC              |

# - No correlation as BIPR is absent in coMMpass matrix; \* PC= Protein coding; TUP=transcribed unprocessed pseudogene; PP= processed pseudogene; TPP=transcribed processed pseudogene

**Supplementary Table S10.** Results of Cox regression multivariate analysis for selected lncRNAs in high versus low expression group, together with significant clinical and molecular variables respectively in PFS and OS, in 497 MM patients of CoMMpass cohort. The number (N) and percentage of MM cases at higher expression levels are reported for each lncRNA. Hazard Ratio (HR) and 95% Confidence Interval (95% CI) are reported for each variable. Global p-value from Log-Rank test is also indicated for each analysis.

| <b>Multivariate Cox Analysis</b>                 |                  |                         |                   |                    |
|--------------------------------------------------|------------------|-------------------------|-------------------|--------------------|
| <b>Variable</b>                                  | <b>OS</b>        |                         | <b>PFS</b>        |                    |
|                                                  | <b>P-value</b>   | <b>HR (95% CI)</b>      | <b>P-value</b>    | <b>HR (95% CI)</b> |
| <b>ENSG00000245910_high.level (N=262, 52,7%)</b> | <b>1,40E-02</b>  | <b>1,62 (1,10-2,39)</b> |                   |                    |
| del1p.CDKN2C                                     | 1,98E-01         | 1.32 (0,87-2,00)        |                   |                    |
| del13q.RB1                                       | 7,30E-02         | 1.52 (0,96-2,39)        |                   |                    |
| HD                                               | 2,15E-01         | 0,77 (0,51-1,16)        |                   |                    |
| TP53.alt.1q.gain.amp                             | <0,001           | 3,58 (1,74-7,40)        |                   |                    |
| gain.amp.1q                                      | 1,80E-02         | 1.63 (1,09-2,44)        |                   |                    |
| DIS3mut                                          | 2,94E-01         | 1.31 (0,79-2,16)        |                   |                    |
| t4.14                                            | 6,09E-01         | 0,87 (0,51-1,49)        |                   |                    |
| trx.MAF                                          | 9,50E-01         | 1.02 (0,53-1,98)        |                   |                    |
| ISS I                                            | <0,001           | 0,40 (0,23-0,69)        |                   |                    |
| ISS III                                          | 4,90E-02         | 1.51 (1,00-2,27)        |                   |                    |
| <i>Log-Rank global p-value</i>                   | <b>p=9,1e-11</b> |                         |                   |                    |
| <b>ENSG00000240875_high.level (N=240, 48%)</b>   | 3,02E-01         | 0,82 (0,56-1,20)        | 3,64E-01          | 0,88 (0,68-1,15)   |
| del1p.CDKN2C                                     | 1,90E-01         | 1.32 (0,87-2,00)        | -                 | -                  |
| del13q.RB1                                       | 6,10E-02         | 1.54 (0,98-2,43)        | 2,90E-02          | 1.40 (1,03-1,91)   |
| HD                                               | 1,69E-01         | 0,75 (0,50-1,13)        | 3,70E-02          | 0,74 (0,55-0,98)   |
| TP53.alt.1q.gain.amp                             | 1,00E-03         | 3,29 (1,60-6,77)        | 1,60E-02          | 2,13 (1,15-3,94)   |
| gain.amp.1q                                      | 3,70E-02         | 1.53 (1,02-2,28)        | 8,60E-02          | 1,28 (0,97-1,69)   |
| DIS3mut                                          | 3,08E-01         | 1.29 (0,79-2,12)        | 2,71E-01          | 1,22 (0,86-1,73)   |
| t4.14                                            | 2,60E-01         | 0,74 (0,43-1,25)        | 8,42E-01          | 0,96 (0,65-1,42)   |
| trx.MAF                                          | 9,80E-01         | 1.01 (0,52-1,95)        | 9,26E-01          | 1.02 (0,62-1,69)   |
| trx.MYC                                          | -                | -                       | 2,80E-02          | 1.89 (1,07-3,34)   |
| ISS I                                            | <0,001           | 0,40 (0,23-0,69)        | 2,00E-03          | 0,58 (0,42-0,82)   |
| ISS III                                          | 4,90E-02         | 1.51 (1,00-2,20)        | 3,10E-02          | 1.39 (1,03-1,87)   |
| <i>Log-Rank global p-value</i>                   | <b>p=8,3e-10</b> |                         | <b>p=8,1e-11</b>  |                    |
| <b>ENSG00000251323_high.level (N=263, 53%)</b>   |                  |                         | 4,36E-01          | 0,90 (0,68-1,18)   |
| del13q.RB1                                       |                  |                         | 2,30E-02          | 1.42 (1,05-1,92)   |
| HD                                               |                  |                         | 4,10E-02          | 0,74 (0,56-0,99)   |
| TP53.alt.1q.gain.amp                             |                  |                         | 2,10E-02          | 2,08 (1,12-3,86)   |
| gain.amp.1q                                      |                  |                         | 1,17E-01          | 1,25 (0,96-1,66)   |
| DIS3mut                                          |                  |                         | 2,54E-01          | 1,23 (0,86-1,75)   |
| t4.14                                            |                  |                         | 8,05E-01          | 0,95 (0,64-1,41)   |
| trx.MAF                                          |                  |                         | 9,78E-01          | 1,01 (0,61-1,66)   |
| trx.MYC                                          |                  |                         | 2,10E-02          | 1,97 (1,11-3,50)   |
| ISS I                                            |                  |                         | 1,00E-03          | 0,57 (0,41-0,80)   |
| ISS III                                          |                  |                         | 3,60E-02          | 1,38 (1,02-1,86)   |
| <i>Log-Rank global p-value</i>                   |                  |                         | <b>p=8,96e-11</b> |                    |



| <i>Variable</i>                         | <i>OS</i>      |                    | <i>PFS</i>       |                    |
|-----------------------------------------|----------------|--------------------|------------------|--------------------|
|                                         | <i>P-value</i> | <i>HR (95% CI)</i> | <i>P-value</i>   | <i>HR (95% CI)</i> |
| ENSG00000177406_high.level (N=246, 49%) |                |                    | 8,40E-02         | 0,79 (0,60-1,03)   |
| del13q.RB1                              |                |                    | 2,10E-02         | 1.43 (1,06-1,93)   |
| HD                                      |                |                    | 1,50E-02         | 0,69 (0,51-0,93)   |
| TP53.alt.1q.gain.amp                    |                |                    | 2,00E-02         | 2,08 (1,12-3,85)   |
| gain.amp.1q                             |                |                    | 1,46E-01         | 1,23 (0,93-1,63)   |
| DIS3mut                                 |                |                    | 2,44E-01         | 1.23 (0,87-1,74)   |
| t4.14                                   |                |                    | 8,66E-01         | 0,97 (0,66-1,43)   |
| trx.MAF                                 |                |                    | 9,84E-01         | 0,99 (0,60-1,64)   |
| trx.MYC                                 |                |                    | 5,00E-02         | 1.77 (1,00-3,15)   |
| ISS I                                   |                |                    | 2,00E-03         | 0,59 (0,42-0,82)   |
| ISS III                                 |                |                    | 3,10E-02         | 1.39 (1,03-1,88)   |
| <i>Log-Rank global p-value</i>          |                |                    | <i>p=3,1e-11</i> |                    |

**Supplementary Table S11.** Fisher's exact test measuring the correlation between low and high *SNHG6* expression level and the occurrence of main IgH translocations (trx), copy number alterations (CNAs) and non-synonymous somatic mutations in recurrently mutated genes in coMMpass MM cases. del(13q) refers to 13q14, 13q34 cytobands or *RB1* locus; 1q gain to 1q21 cytoband; del(1p) to 1p22 or *CDKN2C* locus; del(17p) to 17p13 or *TP53* locus; HD to hyperdiploid condition. The total number of MM samples analyzed for each kind of data is reported. Significant adjusted p-values (<0.05) were in bold.

| IgH trx (497 MM)                  |     | <i>SNHG6</i> low N | <i>SNHG6</i> high N | P-value      |
|-----------------------------------|-----|--------------------|---------------------|--------------|
| <b>t(4;14)</b>                    | neg | 194                | 234                 | <b>0,03</b>  |
|                                   | pos | 41                 | 28                  |              |
| <b>MAF.trx</b>                    | neg | 223                | 241                 | 0,21         |
|                                   | pos | 12                 | 21                  |              |
| <b>t(11;14)</b>                   | neg | 193                | 202                 | 0,18         |
|                                   | pos | 42                 | 60                  |              |
| <b>MYC.trx</b>                    | neg | 229                | 248                 | 0,17         |
|                                   | pos | 6                  | 14                  |              |
| CNA (497 MM)                      |     | <i>SNHG6</i> low N | <i>SNHG6</i> high N | P-value      |
| <b>1q21 gain</b>                  | neg | 143                | 190                 | <b>0,007</b> |
|                                   | pos | 92                 | 72                  |              |
| <b>del(13q)</b>                   | neg | 117                | 122                 | 0,53         |
|                                   | pos | 118                | 140                 |              |
| <b>1p loss</b>                    | neg | 169                | 185                 | 0,62         |
|                                   | pos | 66                 | 77                  |              |
| <b>del(17p)/TP53</b>              | neg | 214                | 227                 | 0,15         |
|                                   | pos | 21                 | 35                  |              |
| <b>HD</b>                         | neg | 99                 | 117                 | 0,58         |
|                                   | pos | 136                | 145                 |              |
| <b>TP53alt/1q21 gain</b>          | neg | 226                | 252                 | 1            |
|                                   | pos | 9                  | 10                  |              |
| Nonsyn. Somatic Mutation (497 MM) |     | <i>SNHG6</i> low N | <i>SNHG6</i> high N | P-value      |
| <b>N-RAS</b>                      | WT  | 187                | 193                 | 0,41         |
|                                   | mut | 48                 | 69                  |              |
| <b>K-RAS</b>                      | WT  | 181                | 195                 | 0,8200       |
|                                   | mut | 54                 | 67                  |              |
| <b>DIS3</b>                       | WT  | 211                | 236                 | 1            |
|                                   | mut | 24                 | 26                  |              |
| <b>BRAF</b>                       | WT  | 218                | 243                 | 1            |
|                                   | mut | 17                 | 19                  |              |
| <b>TP53alt</b>                    | WT  | 222                | 235                 | 0,36         |
|                                   | mut | 13                 | 27                  |              |
| <b>FAM46C</b>                     | WT  | 213                | 235                 | 0,9400       |
|                                   | mut | 22                 | 27                  |              |



| BCL-2            |       |                |              |                  |
|------------------|-------|----------------|--------------|------------------|
|                  | N     | MM<br>t(11;14) | MM           | pPCL<br>t(11;14) |
| MM<br>t(11;14)   |       | <b>0.0043</b>  |              |                  |
| MM               |       | <b>0.035</b>   | <b>0.043</b> |                  |
| pPCL<br>t(11;14) | 0.053 | 0.14           | 0.44         |                  |
| pPCL             | 0.064 | 0.09           | 0.47         | 0.43             |

| BCL2L1           |               |                |               |                  |
|------------------|---------------|----------------|---------------|------------------|
|                  | N             | MM<br>t(11;14) | MM            | pPCL<br>t(11;14) |
| MM<br>t(11;14)   |               | <b>0.0063</b>  |               |                  |
| MM               | 0.10          | <b>0.010</b>   |               |                  |
| pPCL<br>t(11;14) | <b>0.0001</b> | <b>0.039</b>   | <b>0.0000</b> |                  |
| pPCL             | <b>0.045</b>  | 0.18           | 0.17          | <b>0.0083</b>    |

| BCL2L2           |              |                |              |                  |
|------------------|--------------|----------------|--------------|------------------|
|                  | N            | MM<br>t(11;14) | MM           | pPCL<br>t(11;14) |
| MM<br>t(11;14)   | 0.39         |                |              |                  |
| MM               | 0.12         | 0.08           |              |                  |
| pPCL<br>t(11;14) | <b>0.014</b> | <b>0.0056</b>  | <b>0.032</b> |                  |
| pPCL             | 0.19         | 0.20           | 0.43         | 0.054            |

| MCL1             |               |                |              |                  |
|------------------|---------------|----------------|--------------|------------------|
|                  | N             | MM<br>t(11;14) | MM           | pPCL<br>t(11;14) |
| MM<br>t(11;14)   |               | <b>0.019</b>   |              |                  |
| MM               |               | <b>0.0027</b>  | 0.20         |                  |
| pPCL<br>t(11;14) | 0.14          | 0.13           | <b>0.026</b> |                  |
| pPCL             | <b>0.0023</b> | 0.11           | 0.24         | <b>0.019</b>     |

| BCL2A1 |  |  |  |  |
|  | N | MM t(11;14) | MM | pPCL t(11;14) |
| MM t(11;14) | 0.14 |  |  |  |
| MM | 0.13 | 0.44 |  |  |
| pPCL t(11;14) | 0.27 | **0.018** | **0.010** |  |
| pPCL | 0.18 | 0.43 | 0.47 | **0.03** |
| HRK |  |  |  |  |
|  | N | MM t(11;14) | MM | pPCL t(11;14) |
| MM t(11;14) | 0.07 |  |  |  |
| MM | **0.008** | 0.1 |  |  |
| pPCL t(11;14) | **0.034** | 0.27 | 0.37 |  |
| pPCL | 0.11 | 0.39 | 0.08 | 0.21 |
| BAD |  |  |  |  |
|  | N | MM t(11;14) | MM | pPCL t(11;14) |
| MM t(11;14) | 0.43 |  |  |  |
| MM | 0.172 | 0.11 |  |  |
| pPCL t(11;14) | 0.23 | 0.23 | 0.45 |  |
| pPCL | 0.33 | 0.36 | 0.27 | 0.35 |
| BMF |  |  |  |  |
|  | N | MM t(11;14) | MM | pPCL t(11;14) |
| MM t(11;14) | 0.30 |  |  |  |
| MM | **0.04** | **0.03** |  |  |
| pPCL t(11;14) | 0.47 | 0.29 | **0.020** |  |
| pPCL | 0.32 | 0.48 | 0.06 | 0.32 |
| PMAIP1 |  |  |  |  |
|  | N | MM t(11;14) | MM | pPCL t(11;14) |
| MM t(11;14) | 0.057 |  |  |  |
| MM | 0.42 | **0.0069** |  |  |
| pPCL t(11;14) | **0.0078** | 0.10 | **0.0003** |  |
| pPCL | 0.25 | 0.13 | 0.20 | **0.01** |
| BBC3 |  |  |  |  |
|  | N | MM t(11;14) | MM | pPCL t(11;14) |
| MM t(11;14) | 0.26 |  |  |  |
| MM | 0.33 | 0.33 |  |  |
| pPCL t(11;14) | 0.43 | 0.29 | 0.39 |  |
| pPCL | 0.36 | 0.36 | 0.49 | 0.41 |
| BCL2L11 |  |  |  |  |
|  | N | MM t(11;14) | MM | pPCL t(11;14) |
| MM t(11;14) | **0.0099** |  |  |  |
| MM | 0.12 | **0.011** |  |  |
| pPCL t(11;14) | 0.07 | 0.17 | 0.23 |  |
| pPCL | 0.12 | 0.07 | 0.39 | 0.35 |
| BID |  |  |  |  |
|  | N | MM t(11;14) | MM | pPCL t(11;14) |
| MM t(11;14) | **0.0016** |  |  |  |
| MM | **0.0002** | 0.33 |  |  |
| pPCL t(11;14) | 0.06 | 0.06 | **0.0178** |  |
| pPCL | **0.0102** | 0.27 | 0.14 | 0.19 |
| BAK1 |  |  |  |  |
|  | N | MM t(11;14) | MM | pPCL t(11;14) |
| MM t(11;14) | 0.20 |  |  |  |
| MM | **0.0050** | **0.0040** |  |  |
| pPCL t(11;14) | 0.23 | 0.48 | **0.0145** |  |
| pPCL | **0.0129** | **0.026** | 0.49 | **0.039** |
| BAX |  |  |  |  |
|  | N | MM t(11;14) | MM | pPCL t(11;14) |
| MM t(11;14) | 0.39 |  |  |  |
| MM | 0.092 | **0.0051** |  |  |
| pPCL t(11;14) | 0.13 | **0.0355** | 0.49 |  |
| pPCL | 0.06 | **0.0084** | 0.26 | 0.32 |
| BCL-2/BCL2L1 |  |  |  |  |
|  | N | MM t(11;14) | MM | pPCL t(11;14) |
| MM t(11;14) | **0.0005** |  |  |  |
| MM | 0.053 | **0.0007** |  |  |
| pPCL t(11;14) | **0.0001** | 0.13 | **0.0001** |  |
| pPCL | **0.022** | 0.07 | 0.15 | **0.011** |
| BCL-2/MCL1 |  |  |  |  |
|  | N | MM t(11;14) | MM | pPCL t(11;14) |
| MM t(11;14) | 0.227 |  |  |  |
| MM | 0.386 | **0.039** |  |  |
| pPCL t(11;14) | 0.250 | 0.491 | 0.08 |  |
| pPCL | 0.254 | **0.033** | 0.257 | 0.055 |

**Supplementary Figure S2:** Results of Dunn's test evaluating the differences in the expression of BCL2 gene family in MM and pPCL stratified by the presence of t(11;14), and in normal controls (N). Significant p-value<0.05 is marked red-bold. Expression levels are plotted in Figure 3B-C .

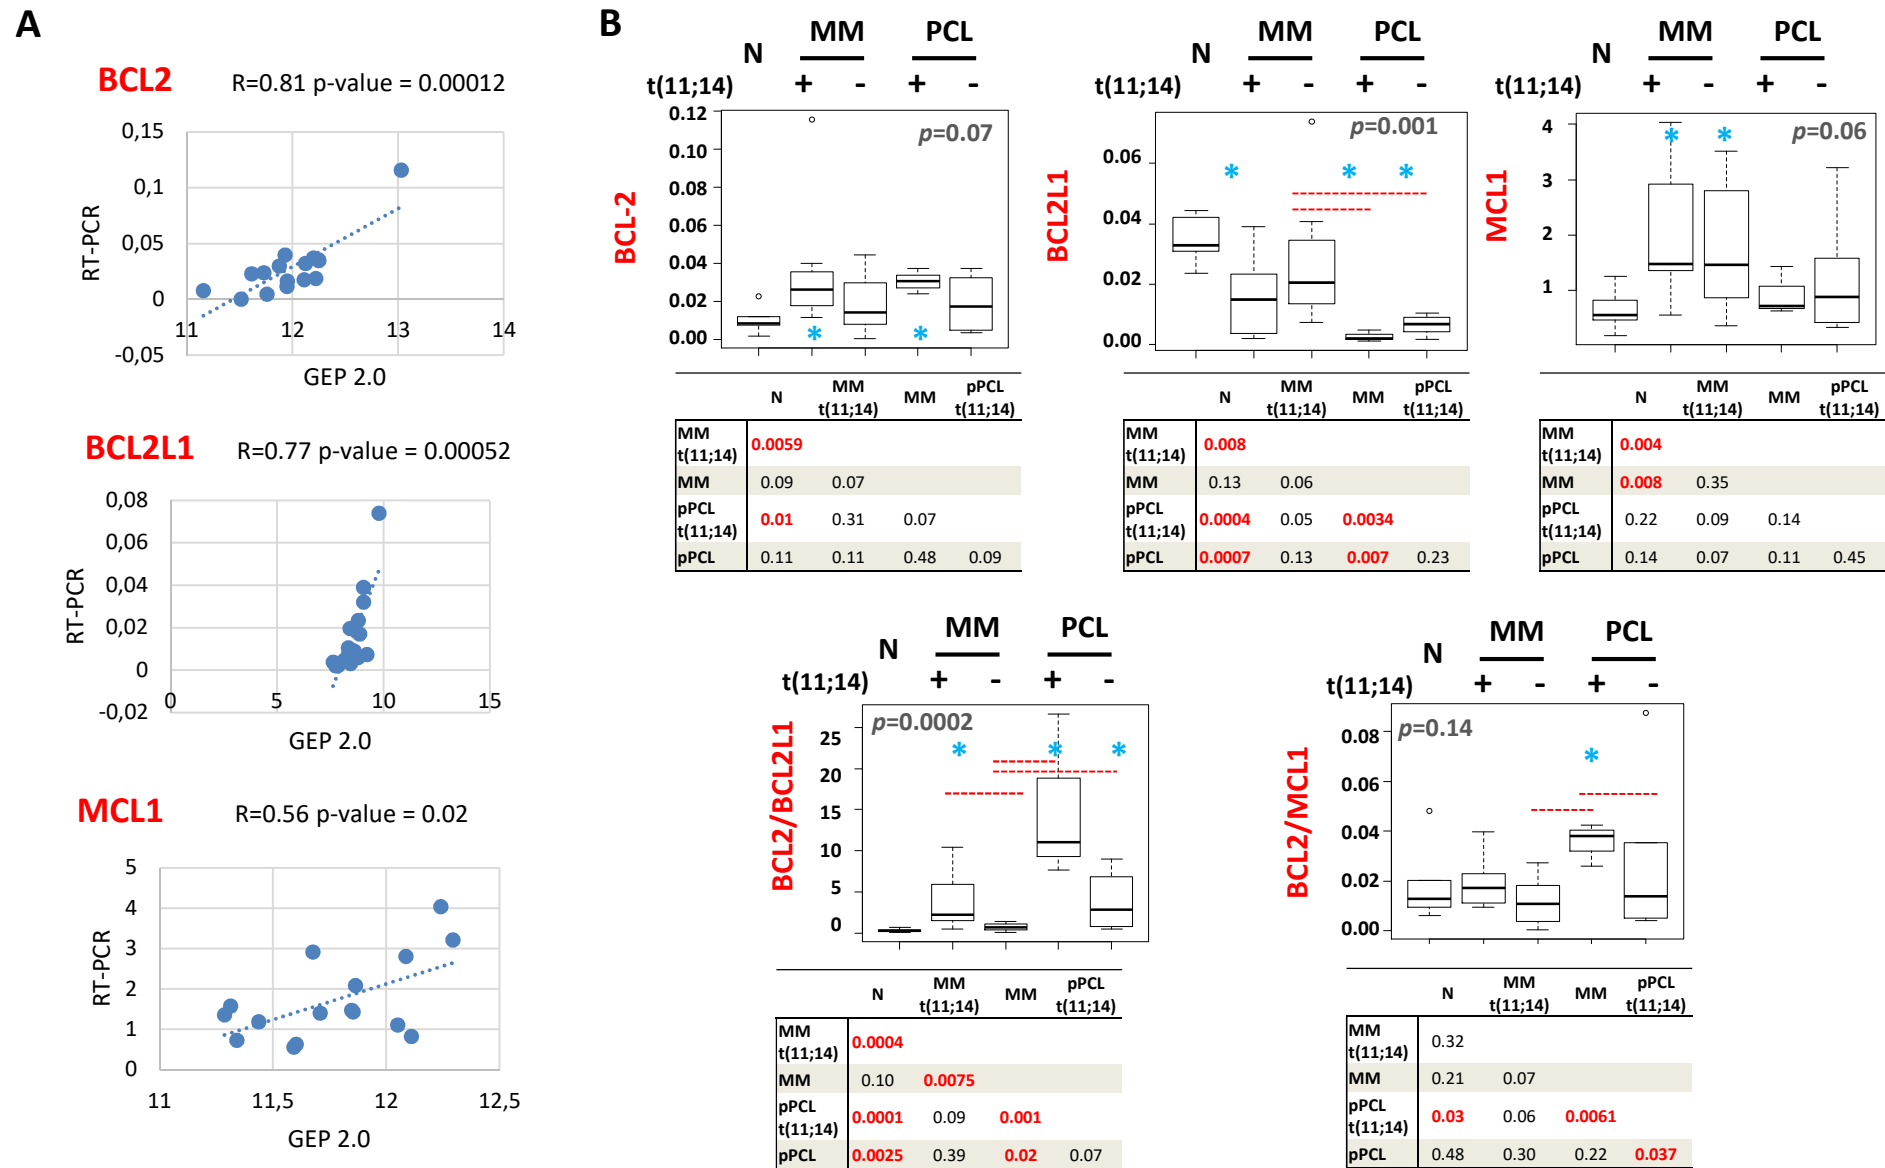

**SupplementaryFigure S3:** Quantitative RT-PCR validation of BCL2, BCL2L1, and MCL1 expression levels. **(A)** Pearson's correlation coefficient was calculated between GEP data and quantitative RT-PCR results expressed as  $2^{-\Delta Ct}$  in 16 samples. **(B)** Box plot representation of the gene expression levels in 34 samples including 6 normal controls (N), 9 MM patients carrying t(11;14), 10 MMs without t(11;14), 3 pPCL patients carrying t(11;14), and 6 pPCLs without t(11;14) evaluated by Kruskal-Wallis test ( $p$ -values are shown for each panel). The expression levels are represented as  $2^{-\Delta Ct}$ . In each panel, red dashed lines above two groups indicate significant differences in their gene expression level, blue asterisks indicate significant differences between the indicated group and N evaluated by Dunn's test (table under the corresponding box plot, significant  $p$ -value  $< 0.05$  is marked red-bold).

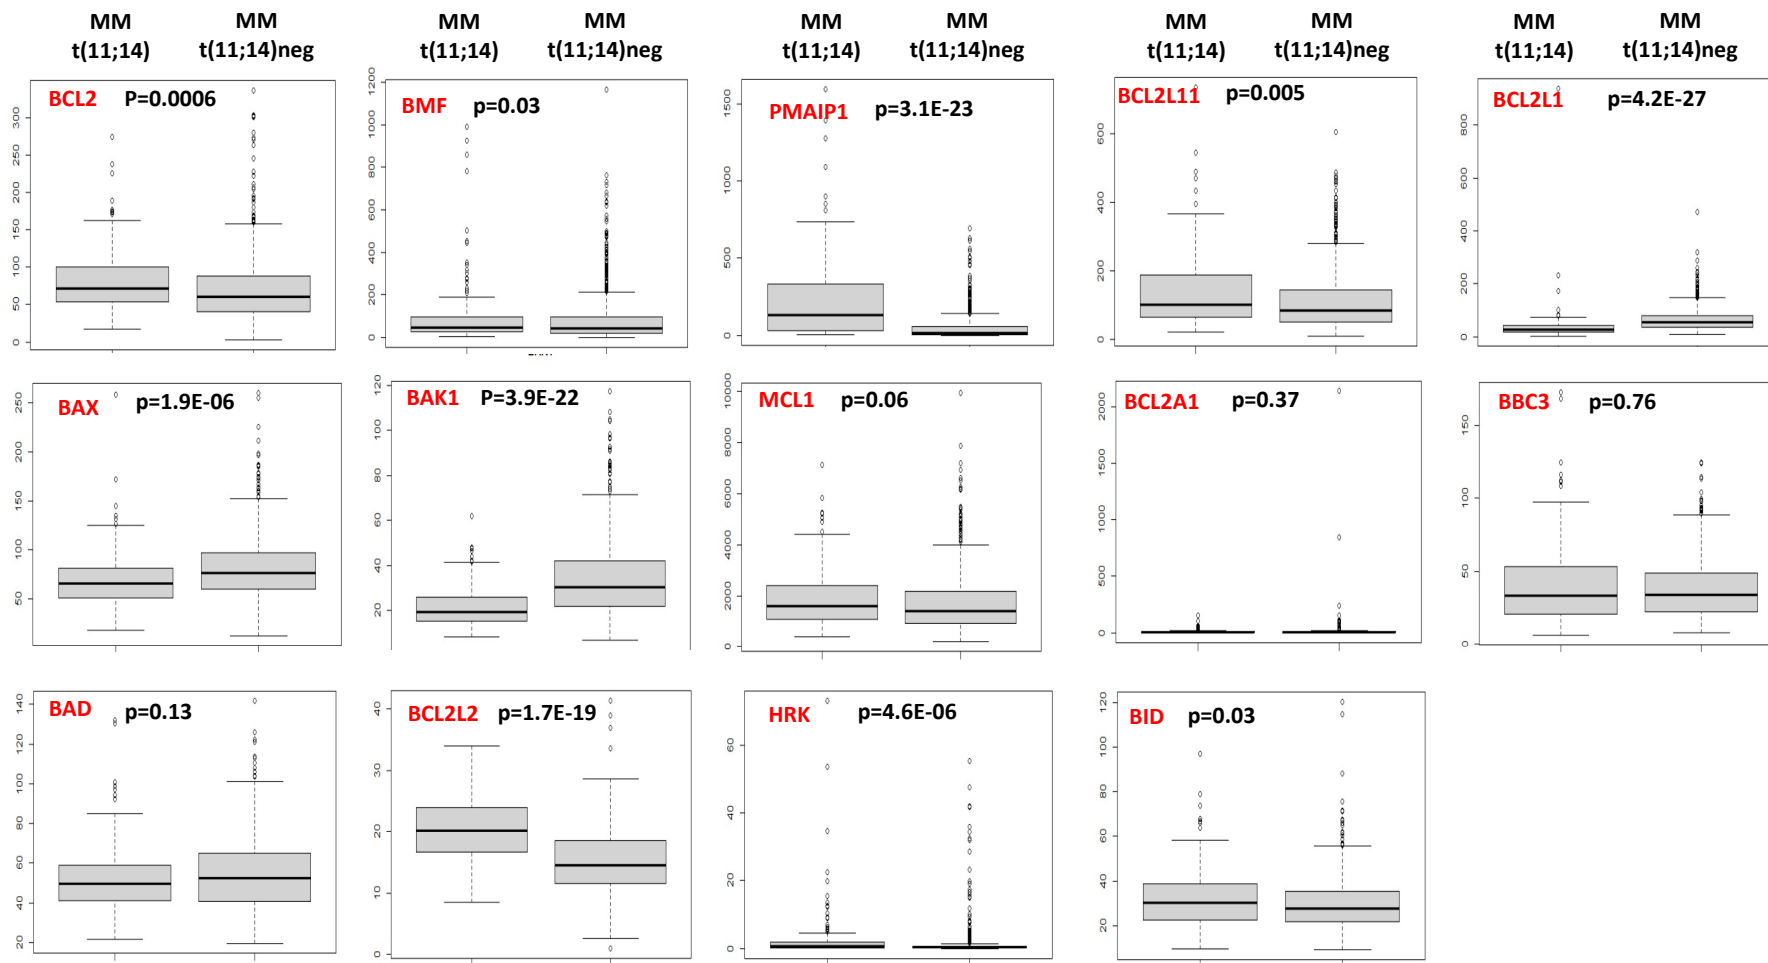

**Supplementary Figure S4:** Box plot representation of the mRNA expression of BCL2 family genes in 156 MM with t(11;14) and 618 MM without t(11;14) from the CoMMpass database. For each plot BH adjusted p-value is reported.

**MS4A1**

|               | N            | MM t(11;14)   | MM   | pPCL t(11;14) |
|---------------|--------------|---------------|------|---------------|
| MM t(11;14)   | 0.49         |               |      |               |
| MM            | <b>0.011</b> | <b>0.0002</b> |      |               |
| pPCL t(11;14) | <b>0.032</b> | <b>0.0075</b> | 0.47 |               |
| pPCL          | <b>0.040</b> | <b>0.0100</b> | 0.37 | 0.42          |

**VPREB3**

|               | N             | MM t(11;14)   | MM   | pPCL t(11;14) |
|---------------|---------------|---------------|------|---------------|
| MM t(11;14)   | 0.28          |               |      |               |
| MM            | <b>0.0020</b> | <b>0.0000</b> |      |               |
| pPCL t(11;14) | <b>0.0058</b> | <b>0.0016</b> | 0.43 |               |
| pPCL          | <b>0.0009</b> | <b>0.0001</b> | 0.15 | 0.26          |

**RASGRP2**

|               | N             | MM t(11;14) | MM   | pPCL t(11;14) |
|---------------|---------------|-------------|------|---------------|
| MM t(11;14)   | <b>0.013</b>  |             |      |               |
| MM            | <b>0.0006</b> | 0.10        |      |               |
| pPCL t(11;14) | <b>0.0006</b> | 0.056       | 0.20 |               |
| pPCL          | <b>0.014</b>  | 0.44        | 0.17 | 0.09          |

**PIK3AP1**

|               | N             | MM t(11;14)   | MM    | pPCL t(11;14) |
|---------------|---------------|---------------|-------|---------------|
| MM t(11;14)   | <b>0.044</b>  |               |       |               |
| MM            | <b>0.0024</b> | 0.06          |       |               |
| pPCL t(11;14) | <b>0.0004</b> | <b>0.0084</b> | 0.059 |               |
| pPCL          | <b>0.0003</b> | <b>0.0073</b> | 0.055 | 0.48          |

**CD79A**

|               | N             | MM t(11;14)   | MM   | pPCL t(11;14) |
|---------------|---------------|---------------|------|---------------|
| MM t(11;14)   | 0.5           |               |      |               |
| MM            | <b>0.0016</b> | <b>0.0000</b> |      |               |
| pPCL t(11;14) | <b>0.0040</b> | <b>0.0002</b> | 0.38 |               |
| pPCL          | <b>0.0004</b> | <b>0.0000</b> | 0.10 | 0.23          |

**STAT5A**

|               | N             | MM t(11;14)   | MM   | pPCL t(11;14) |
|---------------|---------------|---------------|------|---------------|
| MM t(11;14)   | 0.12          |               |      |               |
| MM            | <b>0.0025</b> | <b>0.0070</b> |      |               |
| pPCL t(11;14) | <b>0.0018</b> | <b>0.0070</b> | 0.19 |               |
| pPCL          | <b>0.0005</b> | <b>0.0015</b> | 0.08 | 0.36          |

**SORT1**

|               | N             | MM t(11;14)   | MM   | pPCL t(11;14) |
|---------------|---------------|---------------|------|---------------|
| MM t(11;14)   | <b>0.0014</b> |               |      |               |
| MM            | 0.44          | <b>0.0000</b> |      |               |
| pPCL t(11;14) | 0.19          | <b>0.0064</b> | 0.13 |               |
| pPCL          | 0.20          | <b>0.0000</b> | 0.06 | <b>0.021</b>  |

**BEND5**

|               | N             | MM t(11;14)   | MM   | pPCL t(11;14) |
|---------------|---------------|---------------|------|---------------|
| MM t(11;14)   | 0.44          |               |      |               |
| MM            | <b>0.0018</b> | <b>0.0000</b> |      |               |
| pPCL t(11;14) | <b>0.0013</b> | <b>0.0001</b> | 0.18 |               |
| pPCL          | <b>0.0015</b> | <b>0.0001</b> | 0.23 | 0.43          |

**IL4R**

|               | N             | MM t(11;14) | MM   | pPCL t(11;14) |
|---------------|---------------|-------------|------|---------------|
| MM t(11;14)   | <b>0.016</b>  |             |      |               |
| MM            | <b>0.020</b>  | 0.31        |      |               |
| pPCL t(11;14) | <b>0.0052</b> | 0.21        | 0.09 |               |
| pPCL          | <b>0.049</b>  | 0.31        | 0.43 | 0.12          |

**REL**

|               | N             | MM t(11;14)   | MM   | pPCL t(11;14) |
|---------------|---------------|---------------|------|---------------|
| MM t(11;14)   | 0.35          |               |      |               |
| MM            | <b>0.0089</b> | <b>0.0009</b> |      |               |
| pPCL t(11;14) | <b>0.033</b>  | <b>0.024</b>  | 0.40 |               |
| pPCL          | <b>0.031</b>  | <b>0.021</b>  | 0.39 | 0.49          |

**CXCR5**

|               | N             | MM t(11;14) | MM   | pPCL t(11;14) |
|---------------|---------------|-------------|------|---------------|
| MM t(11;14)   | <b>0.023</b>  |             |      |               |
| MM            | <b>0.0094</b> | 0.39        |      |               |
| pPCL t(11;14) | 0.134         | 0.16        | 0.09 |               |
| pPCL          | <b>0.029</b>  | 0.49        | 0.41 | 0.18          |

**BATF**

|               | N             | MM t(11;14)   | MM           | pPCL t(11;14) |
|---------------|---------------|---------------|--------------|---------------|
| MM t(11;14)   | <b>0.0023</b> |               |              |               |
| MM            | <b>0.023</b>  | <b>0.037</b>  |              |               |
| pPCL t(11;14) | 0.32          | <b>0.0024</b> | <b>0.033</b> |               |
| pPCL          | <b>0.028</b>  | 0.15          | 0.37         | <b>0.04</b>   |

**Supplementary Figure S5:** Results of Dunn's test evaluating the differences in the expression of B-cell genes from the signature of venetoclax sensitive myeloma in MM and PCL stratified by the presence of t(11;14), and in normal controls (N). Significant p-value<0.05 is marked red-bold. Expression levels are plotted in Figure 4.

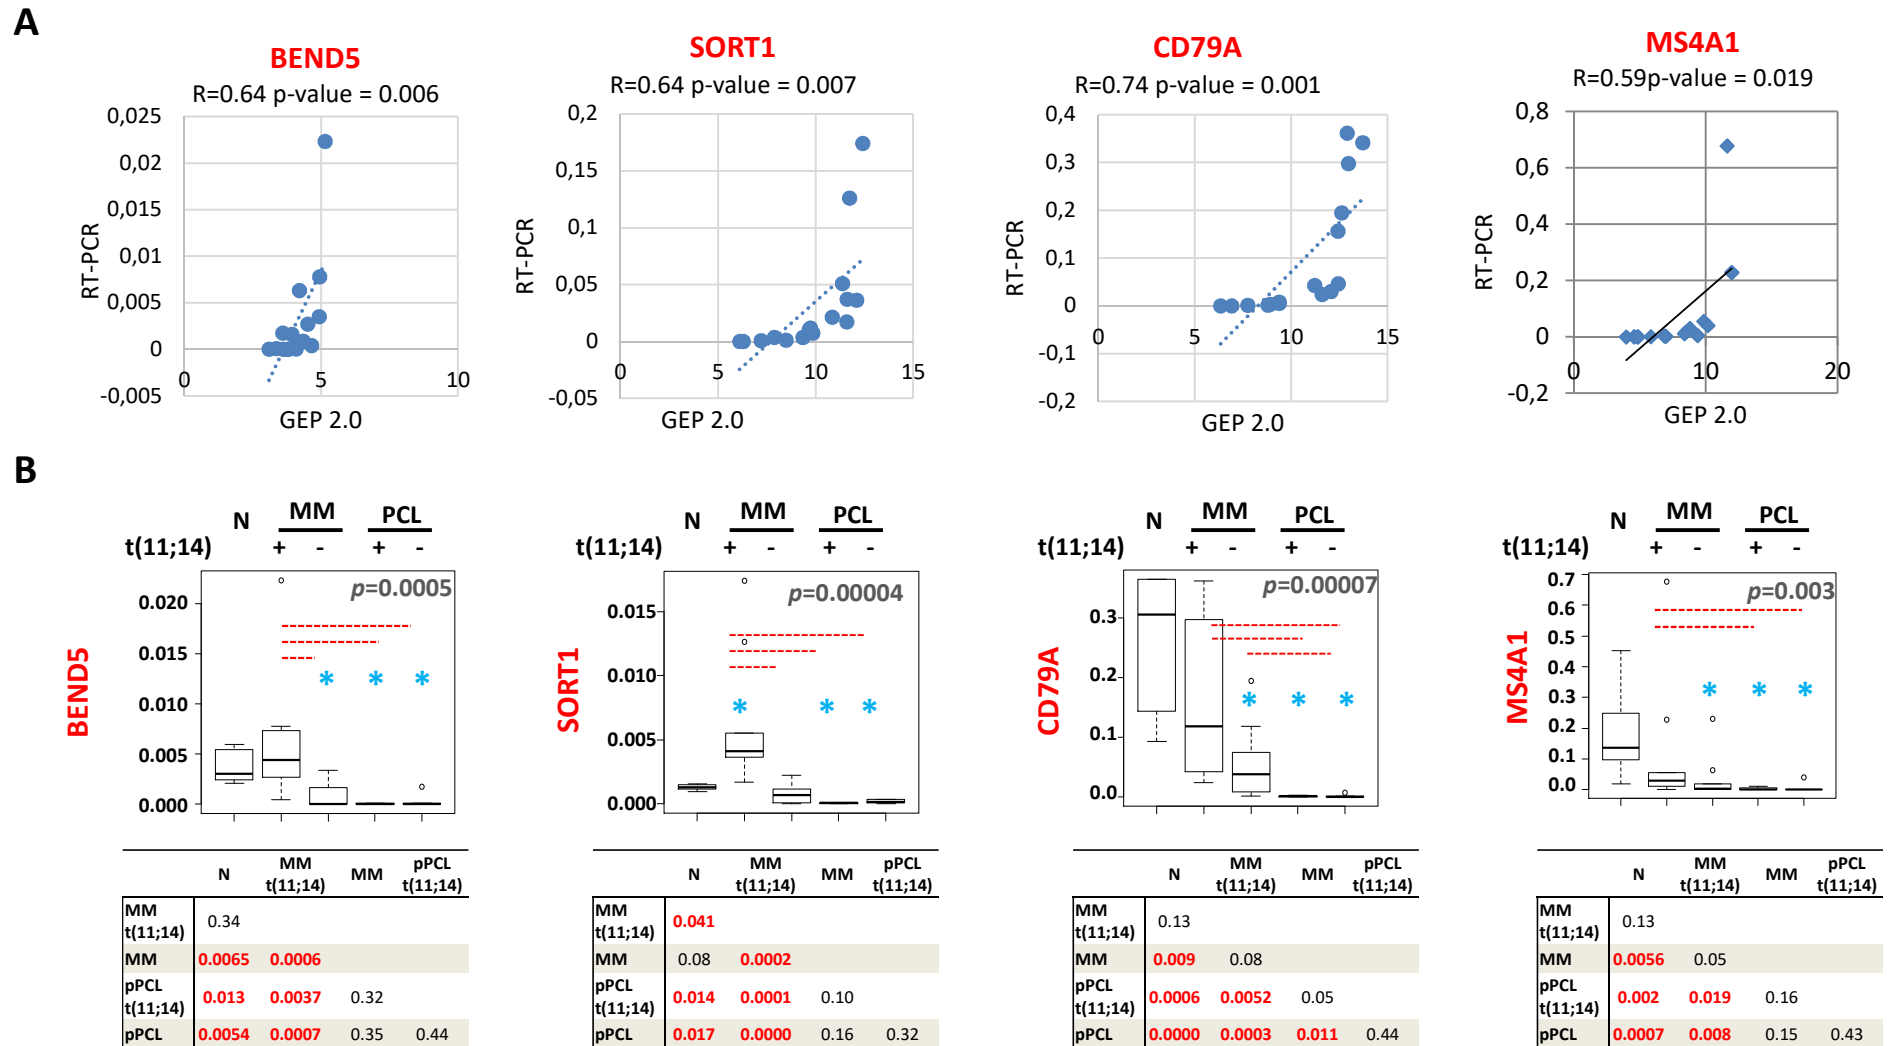

**SupplementaryFigure S6:** Quantitative RT-PCR validation of BEND5, SORT1, CD79A, and MS4A1 expression levels **(A)** Pearson's correlation coefficient was calculated between GEP data and quantitative RT-PCR results expressed as  $2^{-\Delta Ct}$  in 16 samples. **(B)** Box plot representation of the gene expression levels in 34 samples including 6 normal controls (N), 9 MM patients carrying t(11;14), 10 MM patients without t(11;14), 3 pPCL patients carrying t(11;14), and 6 pPCLs without t(11;14) evaluated by Kruskal-Wallis test (p-values are shown for each panel). The expression levels are represented as  $2^{-\Delta Ct}$ . In each panel, red dashed lines above two groups indicate significant differences in their gene expression level, blue asterisks indicate significant differences between the indicated group and N evaluated by Dunn's test (table under the corresponding box plot, significant p-value < 0.05 is marked red-bold).



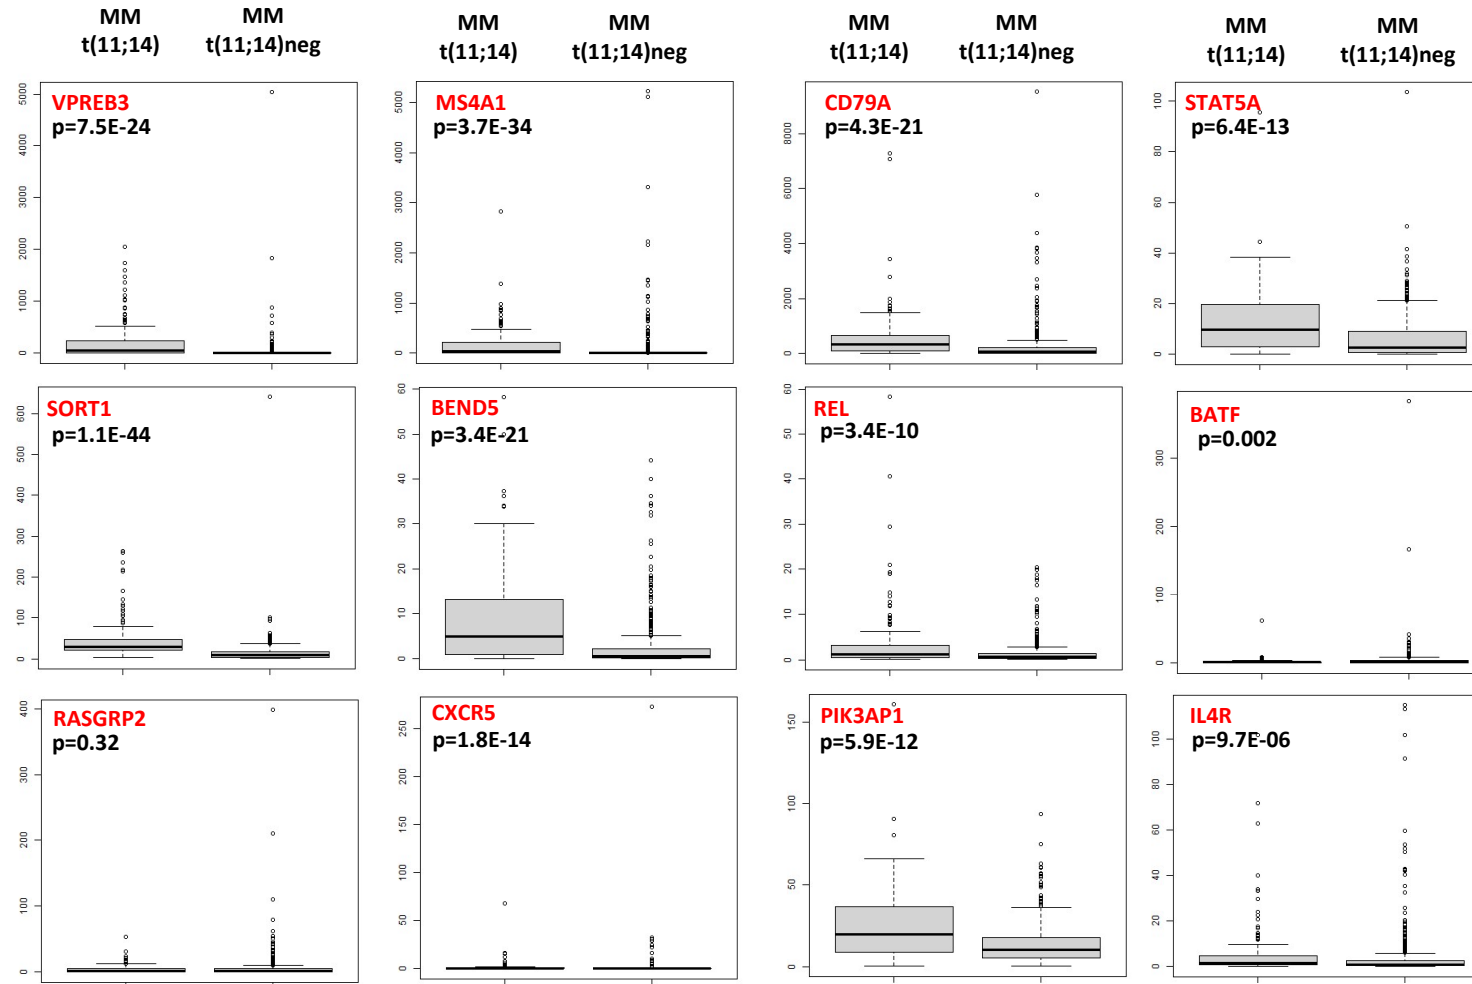

**Supplementary Figure S7:** Box plot representation of the mRNA expression of the signature of venetoclax sensitive myeloma in 156 MM with t(11;14) and 618 MM without t(11;14) from the CoMMpass database. For each plot BH adjusted p-value is reported.

**A**

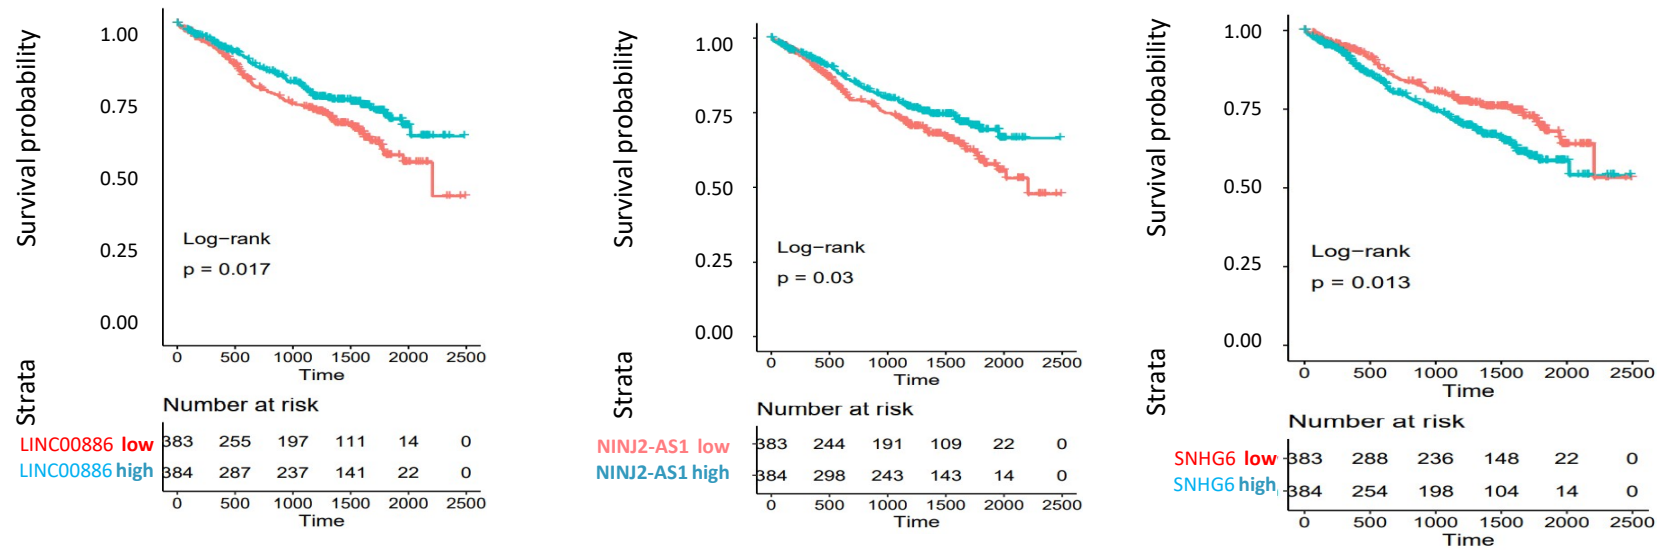

**B**

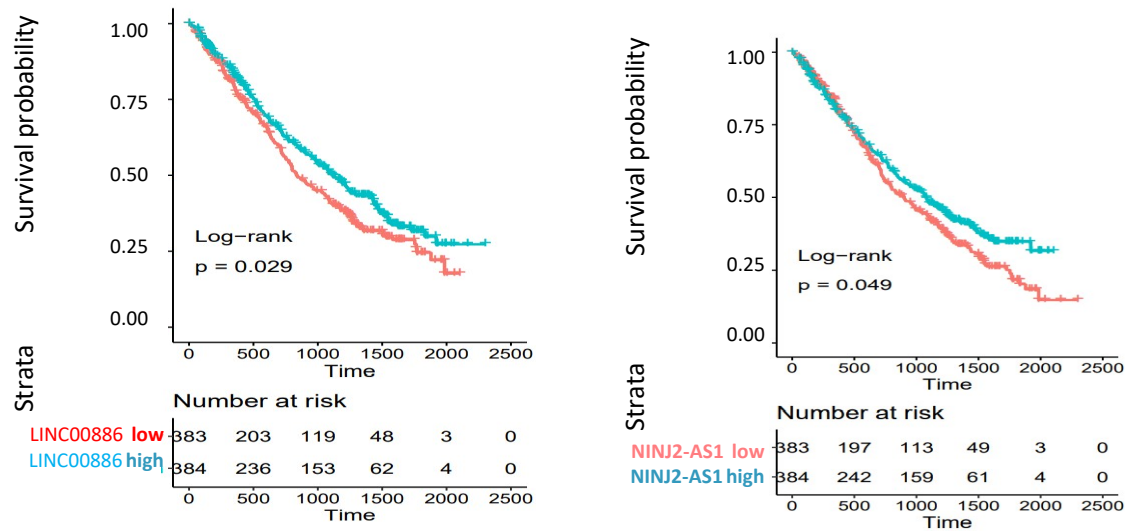

**Supplementary Figure S8:** Kaplan-Meiersurvivalcurvesin767BM\_1MMcasesstratifiedaccordingtotheexpressionlevel ofthespecifiedlncRNAwithrespecttoOS (A) and PFS (B).

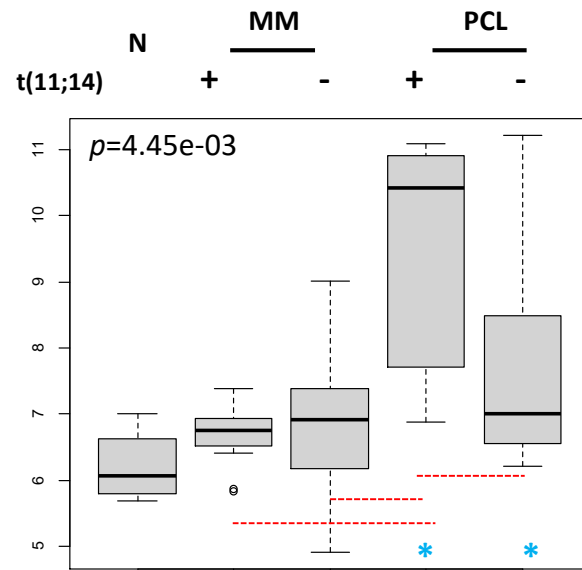

|               | N             | MM t(11;14)   | MM            | pPCL t(11;14) |
|---------------|---------------|---------------|---------------|---------------|
| MM t(11;14)   | 0.184         |               |               |               |
| MM            | 0.069         | 0.215         |               |               |
| pPCL t(11;14) | <b>0.0005</b> | <b>0.0006</b> | <b>0.0010</b> |               |
| pPCL          | <b>0.0313</b> | 0.086         | 0.17          | <b>0.039</b>  |

**Supplementary Figure S9:** Boxplot representation of SNHG6 gene expression in 4 normal controls (N), 12 MM patients carrying t(11;14), 38 MM without t(11;14), 7 pPCL patients carrying t(11;14), and 8 pPCL without t(11;14) evaluated by GeneChip® Human Gene 2.0 ST array (GSE116294). Red dashed lines below two groups indicate significant differences in their gene expression level, blue asterisks indicate significant differences between the indicated group and N (Dunn's test, p-value < 0.05 reported in the table on the right). Kruskal-Wallis test p-value is reported.
